# Supplementary material
Source: PubMed Central journal article supplement (PMC519088)
Supplement: plntphys_135_3_1765__1.pdf [file plntphys_135_3_1765__1.pdf]

**Table S1. All reproductive genes.**

| <b>Gene</b> | <b>P in I</b> | <b>P in II</b> | <b>P in III</b> | <b>Specific</b> |
|-------------|---------------|----------------|-----------------|-----------------|
| Atlg01030   | +             |                |                 |                 |
| Atlg01040   | +             | +              | +               |                 |
| Atlg01050   | +             | +              | +               |                 |
| Atlg01060   | +             | +              | +               |                 |
| Atlg01070   | +             | +              |                 |                 |
| Atlg01080   | +             | +              | +               |                 |
| Atlg01090   | +             | +              | +               |                 |
| Atlg01100   | +             | +              | +               |                 |
| Atlg01110   | +             |                |                 | +               |
| Atlg01120   | +             | +              | +               |                 |
| Atlg01130   |               |                | +               | +               |
| Atlg01140   | +             | +              | +               |                 |
| Atlg01160   | +             | +              | +               |                 |
| Atlg01170   | +             | +              | +               |                 |
| Atlg01220   | +             | +              | +               |                 |
| Atlg01225   | +             | +              | +               |                 |
| Atlg01230   | +             | +              | +               |                 |
| Atlg01240   | +             | +              | +               |                 |
| Atlg01250   |               | +              | +               | +               |
| Atlg01260   | +             | +              | +               |                 |
| Atlg01280   | +             |                |                 | +               |
| Atlg01290   | +             | +              | +               |                 |
| Atlg01300   | +             | +              | +               |                 |
| Atlg01310   | +             | +              |                 | +               |
| Atlg01320   | +             | +              | +               |                 |
| Atlg01330   | +             | +              | +               |                 |
| Atlg01360   | +             | +              | +               |                 |
| Atlg01370   | +             | +              | +               |                 |
| Atlg01430   | +             | +              | +               |                 |
| Atlg01440   | +             | +              | +               |                 |
| Atlg01460   |               | +              |                 | +               |
| Atlg01470   | +             | +              | +               |                 |
| Atlg01480   |               |                | +               | +               |
| Atlg01490   | +             | +              | +               |                 |
| Atlg01500   | +             | +              | +               |                 |
| Atlg01510   | +             | +              | +               |                 |
| Atlg01520   | +             |                |                 | +               |
| Atlg01540   | +             | +              | +               |                 |
| Atlg01550   | +             | +              | +               |                 |
| Atlg01560   | +             | +              | +               |                 |
| Atlg01570   | +             | +              |                 |                 |
| Atlg01600   | +             | +              | +               | +               |
| Atlg01610   | +             | +              | +               |                 |
| Atlg01620   | +             | +              | +               |                 |
| Atlg01630   | +             | +              | +               |                 |
| Atlg01640   | +             | +              | +               |                 |
| Atlg01650   | +             | +              | +               |                 |
| Atlg01670   | +             | +              |                 |                 |

|           |   |   |   |   |
|-----------|---|---|---|---|
| Atlg01710 | + | + | + |   |
| Atlg01720 | + | + | + |   |
| Atlg01725 | + | + | + |   |
| Atlg01730 | + | + | + |   |
| Atlg01740 | + | + | + |   |
| Atlg01750 | + | + |   |   |
| Atlg01770 | + | + | + |   |
| Atlg01780 | + | + | + |   |
| Atlg01790 | + | + | + |   |
| Atlg01800 | + | + | + |   |
| Atlg01820 | + | + | + |   |
| Atlg01830 | + | + | + |   |
| Atlg01840 | + |   | + |   |
| Atlg01860 | + | + | + |   |
| Atlg01900 | + | + | + |   |
| Atlg01910 | + | + | + |   |
| Atlg01920 | + | + | + |   |
| Atlg01930 | + | + | + |   |
| Atlg01940 | + | + | + |   |
| Atlg01950 | + | + | + |   |
| Atlg01960 | + | + | + |   |
| Atlg01970 | + | + | + |   |
| Atlg01980 |   | + | + | + |
| Atlg01990 | + | + | + |   |
| Atlg02000 | + | + | + |   |
| Atlg02020 | + | + | + |   |
| Atlg02050 | + |   |   |   |
| Atlg02060 | + |   |   |   |
| Atlg02070 | + | + | + | + |
| Atlg02080 | + | + | + |   |
| Atlg02090 | + | + | + |   |
| Atlg02100 | + | + | + |   |
| Atlg02110 | + | + | + |   |
| Atlg02120 | + | + | + |   |
| Atlg02130 | + | + | + |   |
| Atlg02140 | + | + | + |   |
| Atlg02150 | + | + | + |   |
| Atlg02160 | + | + | + |   |
| Atlg02170 | + | + | + |   |
| Atlg02180 | + | + | + |   |
| Atlg02190 | + | + | + | + |
| Atlg02200 | + | + | + |   |
| Atlg02205 | + | + | + |   |
| Atlg02220 |   | + | + |   |
| Atlg02260 | + | + | + |   |
| Atlg02270 | + | + | + |   |
| Atlg02280 | + | + | + |   |
| Atlg02300 | + | + | + |   |
| Atlg02305 | + | + | + |   |
| Atlg02310 |   | + | + |   |
| Atlg02330 | + | + | + |   |
| Atlg02340 | + | + | + |   |

|           |   |   |   |   |
|-----------|---|---|---|---|
| Atlg02370 | + | + | + |   |
| Atlg02390 | + | + | + |   |
| Atlg02400 | + | + |   |   |
| Atlg02410 | + | + | + |   |
| Atlg02450 | + | + | + |   |
| Atlg02470 | + | + |   | + |
| Atlg02475 | + | + | + |   |
| Atlg02500 | + | + | + |   |
| Atlg02530 | + | + | + |   |
| Atlg02560 | + | + | + |   |
| Atlg02640 | + | + | + |   |
| Atlg02660 | + | + | + |   |
| Atlg02670 | + |   |   | + |
| Atlg02680 | + | + | + |   |
| Atlg02690 | + | + | + |   |
| Atlg02730 | + | + | + |   |
| Atlg02750 | + | + | + |   |
| Atlg02780 | + | + | + |   |
| Atlg02790 | + | + | + | + |
| Atlg02800 | + | + |   | + |
| Atlg02810 | + | + | + |   |
| Atlg02813 | + |   |   |   |
| Atlg02816 | + | + | + |   |
| Atlg02820 | + | + |   |   |
| Atlg02840 | + | + | + |   |
| Atlg02850 | + | + | + |   |
| Atlg02860 | + | + | + |   |
| Atlg02870 | + | + | + |   |
| Atlg02890 | + | + | + |   |
| Atlg02900 | + |   | + |   |
| Atlg02910 | + | + | + |   |
| Atlg02930 | + | + | + |   |
| Atlg02940 |   |   | + |   |
| Atlg02950 | + | + | + |   |
| Atlg02960 | + | + | + |   |
| Atlg02970 | + | + | + |   |
| Atlg02980 |   |   | + | + |
| Atlg03000 | + | + | + |   |
| Atlg03010 |   |   | + |   |
| Atlg03020 |   | + |   |   |
| Atlg03030 | + | + | + |   |
| Atlg03040 | + | + | + |   |
| Atlg03050 | + | + |   | + |
| Atlg03055 | + |   | + |   |
| Atlg03060 | + | + | + |   |
| Atlg03070 | + | + | + |   |
| Atlg03080 | + | + | + |   |
| Atlg03090 | + | + | + |   |
| Atlg03100 |   | + | + |   |
| Atlg03110 | + | + | + |   |
| Atlg03130 | + | + | + |   |
| Atlg03140 | + | + | + |   |

|           |   |   |   |   |
|-----------|---|---|---|---|
| Atlg03150 | + | + | + |   |
| Atlg03160 | + | + | + |   |
| Atlg03170 | + | + | + | + |
| Atlg03180 |   | + | + |   |
| Atlg03190 | + | + | + |   |
| Atlg03210 | + | + | + |   |
| Atlg03220 | + | + | + |   |
| Atlg03240 | + | + | + |   |
| Atlg03250 | + | + | + |   |
| Atlg03260 | + | + | + |   |
| Atlg03270 | + | + | + |   |
| Atlg03280 | + | + | + |   |
| Atlg03290 | + | + | + |   |
| Atlg03300 | + | + | + |   |
| Atlg03310 | + | + | + |   |
| Atlg03330 | + | + | + |   |
| Atlg03350 | + | + | + |   |
| Atlg03360 | + | + | + |   |
| Atlg03370 | + | + | + |   |
| Atlg03380 | + | + | + |   |
| Atlg03390 | + |   |   | + |
| Atlg03400 | + | + | + |   |
| Atlg03420 | + | + | + |   |
| Atlg03430 | + | + | + |   |
| Atlg03440 | + | + | + |   |
| Atlg03457 | + | + | + |   |
| Atlg03470 | + |   |   |   |
| Atlg03475 | + | + | + |   |
| Atlg03510 |   |   | + |   |
| Atlg03520 | + | + | + |   |
| Atlg03530 | + | + | + |   |
| Atlg03550 | + | + | + |   |
| Atlg03560 | + | + | + |   |
| Atlg03590 | + | + | + |   |
| Atlg03600 | + | + | + |   |
| Atlg03610 | + | + | + |   |
| Atlg03620 | + | + |   |   |
| Atlg03630 | + | + | + |   |
| Atlg03660 |   | + |   |   |
| Atlg03675 | + | + | + |   |
| Atlg03687 | + | + | + |   |
| Atlg03710 | + | + | + | + |
| Atlg03730 | + | + | + |   |
| Atlg03740 | + | + | + |   |
| Atlg03750 | + | + | + |   |
| Atlg03760 | + | + | + |   |
| Atlg03770 | + | + | + |   |
| Atlg03780 | + | + | + |   |
| Atlg03820 | + | + | + |   |
| Atlg03830 | + |   |   | + |
| Atlg03850 | + | + | + |   |
| Atlg03860 | + | + | + |   |

|           |   |   |   |   |
|-----------|---|---|---|---|
| Atlg03870 | + | + | + |   |
| Atlg03900 | + | + | + |   |
| Atlg03910 | + | + | + |   |
| Atlg03920 | + | + | + |   |
| Atlg03930 | + | + | + |   |
| Atlg03940 |   | + |   | + |
| Atlg03950 | + | + | + |   |
| Atlg03960 | + | + | + |   |
| Atlg03970 | + | + | + |   |
| Atlg03980 |   |   | + |   |
| Atlg04000 | + | + | + |   |
| Atlg04010 | + |   | + |   |
| Atlg04020 | + | + | + |   |
| Atlg04030 | + | + | + |   |
| Atlg04040 | + |   | + |   |
| Atlg04050 | + | + | + |   |
| Atlg04070 | + | + | + |   |
| Atlg04080 | + | + | + |   |
| Atlg04090 | + |   |   | + |
| Atlg04100 | + |   |   |   |
| Atlg04110 | + | + | + |   |
| Atlg04120 | + | + | + |   |
| Atlg04130 | + | + | + |   |
| Atlg04140 | + | + | + |   |
| Atlg04150 | + | + | + |   |
| Atlg04160 | + | + | + |   |
| Atlg04170 | + | + | + |   |
| Atlg04190 | + | + | + |   |
| Atlg04200 | + | + | + |   |
| Atlg04220 | + | + | + |   |
| Atlg04230 | + | + | + |   |
| Atlg04240 | + | + | + |   |
| Atlg04250 | + | + | + |   |
| Atlg04260 | + | + | + |   |
| Atlg04270 | + | + | + |   |
| Atlg04290 | + | + | + |   |
| Atlg04300 | + | + | + |   |
| Atlg04310 | + | + | + |   |
| Atlg04340 | + | + | + |   |
| Atlg04350 | + | + | + |   |
| Atlg04400 | + | + | + |   |
| Atlg04410 | + | + | + |   |
| Atlg04420 | + | + | + |   |
| Atlg04430 | + | + | + |   |
| Atlg04440 | + | + | + |   |
| Atlg04470 | + | + | + | + |
| Atlg04480 | + | + | + |   |
| Atlg04500 | + |   |   | + |
| Atlg04510 | + | + | + |   |
| Atlg04520 | + | + | + |   |
| Atlg04530 | + | + | + |   |
| Atlg04540 | + | + | + | + |

|           |   |   |   |   |
|-----------|---|---|---|---|
| Atlg04550 | + | + | + |   |
| Atlg04580 | + |   |   | + |
| Atlg04590 | + | + | + |   |
| Atlg04600 | + | + |   |   |
| Atlg04610 |   | + |   |   |
| Atlg04620 | + | + | + |   |
| Atlg04640 | + | + | + |   |
| Atlg04645 | + | + | + | + |
| Atlg04650 | + |   |   |   |
| Atlg04660 | + | + |   | + |
| Atlg04670 | + |   |   | + |
| Atlg04680 | + | + | + |   |
| Atlg04690 | + | + | + |   |
| Atlg04700 | + | + | + |   |
| Atlg04710 | + | + | + |   |
| Atlg04730 | + | + | + |   |
| Atlg04750 | + | + | + |   |
| Atlg04760 | + | + | + |   |
| Atlg04770 | + | + | + |   |
| Atlg04780 | + | + | + |   |
| Atlg04790 | + | + | + |   |
| Atlg04800 | + | + | + |   |
| Atlg04810 | + | + | + |   |
| Atlg04820 | + | + | + |   |
| Atlg04830 | + | + | + |   |
| Atlg04850 | + | + | + |   |
| Atlg04860 | + | + | + |   |
| Atlg04870 | + | + | + |   |
| Atlg04880 | + | + |   | + |
| Atlg04900 | + | + | + |   |
| Atlg04910 | + | + | + |   |
| Atlg04920 | + |   |   | + |
| Atlg04930 | + | + |   |   |
| Atlg04940 | + | + | + | + |
| Atlg04950 | + | + | + |   |
| Atlg04960 | + | + | + |   |
| Atlg04970 | + | + | + |   |
| Atlg04980 | + | + | + |   |
| Atlg04985 | + | + | + |   |
| Atlg04990 | + | + | + |   |
| Atlg05000 | + | + |   |   |
| Atlg05010 | + | + | + |   |
| Atlg05020 | + |   |   |   |
| Atlg05030 | + | + | + |   |
| Atlg05040 | + |   |   | + |
| Atlg05050 | + | + | + |   |
| Atlg05060 | + | + | + |   |
| Atlg05070 | + | + | + |   |
| Atlg05100 |   | + |   | + |
| Atlg05120 | + | + | + |   |
| Atlg05140 | + | + | + |   |
| Atlg05150 | + | + | + |   |

|           |   |   |   |   |
|-----------|---|---|---|---|
| Atlg05160 | + | + | + |   |
| Atlg05170 | + | + | + |   |
| Atlg05180 | + | + | + |   |
| Atlg05190 | + | + | + |   |
| Atlg05200 | + |   | + |   |
| Atlg05205 | + | + | + |   |
| Atlg05210 | + | + | + |   |
| Atlg05230 | + | + | + |   |
| Atlg05260 | + |   | + |   |
| Atlg05270 | + | + | + |   |
| Atlg05290 | + |   |   | + |
| Atlg05320 | + | + | + |   |
| Atlg05340 |   | + | + |   |
| Atlg05350 | + | + | + |   |
| Atlg05360 | + | + | + |   |
| Atlg05380 | + | + | + |   |
| Atlg05385 | + | + | + |   |
| Atlg05410 | + | + | + |   |
| Atlg05430 | + | + | + |   |
| Atlg05440 | + | + | + |   |
| Atlg05450 | + | + |   |   |
| Atlg05460 | + |   | + |   |
| Atlg05470 | + | + | + |   |
| Atlg05480 | + | + | + | + |
| Atlg05490 | + | + | + | + |
| Atlg05500 | + | + | + |   |
| Atlg05520 | + | + | + |   |
| Atlg05540 | + | + | + |   |
| Atlg05550 |   |   | + |   |
| Atlg05560 | + | + | + |   |
| Atlg05570 | + | + | + |   |
| Atlg05590 | + | + | + |   |
| Atlg05600 | + | + | + |   |
| Atlg05610 | + |   | + |   |
| Atlg05620 | + | + | + |   |
| Atlg05630 | + | + | + |   |
| Atlg05670 | + | + | + | + |
| Atlg05680 | + | + | + | + |
| Atlg05690 | + |   |   |   |
| Atlg05710 | + | + | + |   |
| Atlg05720 | + | + | + |   |
| Atlg05760 | + | + | + |   |
| Atlg05790 | + | + | + |   |
| Atlg05805 | + | + | + |   |
| Atlg05810 | + | + | + |   |
| Atlg05840 | + | + | + |   |
| Atlg05850 | + | + | + |   |
| Atlg05860 | + | + | + |   |
| Atlg05890 | + | + | + |   |
| Atlg05900 |   | + | + |   |
| Atlg05910 | + | + | + |   |
| Atlg05940 | + | + | + |   |

|           |   |   |   |   |
|-----------|---|---|---|---|
| Atlg05950 | + |   |   | + |
| Atlg05960 | + | + | + |   |
| Atlg06000 | + | + | + |   |
| Atlg06010 | + | + | + |   |
| Atlg06040 | + | + | + |   |
| Atlg06050 | + | + | + |   |
| Atlg06060 | + | + | + |   |
| Atlg06070 | + | + | + |   |
| Atlg06080 | + | + | + |   |
| Atlg06100 | + | + | + |   |
| Atlg06110 | + | + | + |   |
| Atlg06130 | + | + | + |   |
| Atlg06170 | + |   |   | + |
| Atlg06180 | + | + |   |   |
| Atlg06190 | + | + | + |   |
| Atlg06200 | + | + | + |   |
| Atlg06210 | + | + | + |   |
| Atlg06220 | + | + | + |   |
| Atlg06230 | + | + | + |   |
| Atlg06240 | + | + | + |   |
| Atlg06250 | + |   |   |   |
| Atlg06260 | + |   |   | + |
| Atlg06340 |   |   | + | + |
| Atlg06350 | + | + | + |   |
| Atlg06380 | + | + | + |   |
| Atlg06390 | + | + | + |   |
| Atlg06400 | + | + | + |   |
| Atlg06410 | + | + | + |   |
| Atlg06420 | + | + | + | + |
| Atlg06430 | + | + | + |   |
| Atlg06450 | + | + | + |   |
| Atlg06460 | + | + | + |   |
| Atlg06470 | + | + | + |   |
| Atlg06490 | + | + | + |   |
| Atlg06500 | + | + | + |   |
| Atlg06510 | + | + | + |   |
| Atlg06520 | + | + | + |   |
| Atlg06530 | + | + | + |   |
| Atlg06550 | + | + | + |   |
| Atlg06560 | + | + | + |   |
| Atlg06570 | + | + | + |   |
| Atlg06590 | + |   | + |   |
| Atlg06630 | + | + | + |   |
| Atlg06640 | + | + | + |   |
| Atlg06650 | + | + | + |   |
| Atlg06670 | + | + | + |   |
| Atlg06680 | + | + | + |   |
| Atlg06690 | + | + | + |   |
| Atlg06700 | + | + | + |   |
| Atlg06710 | + | + | + |   |
| Atlg06720 | + | + | + |   |
| Atlg06730 | + | + | + |   |



|           |   |   |   |   |
|-----------|---|---|---|---|
| Atlg06740 | + |   |   |   |
| Atlg06760 | + | + | + |   |
| Atlg06770 | + | + | + |   |
| Atlg06780 | + | + | + |   |
| Atlg06790 | + | + | + |   |
| Atlg06820 | + | + | + |   |
| Atlg06830 | + | + |   |   |
| Atlg06840 | + | + |   |   |
| Atlg06850 | + | + | + |   |
| Atlg06870 | + | + | + |   |
| Atlg06890 | + | + | + |   |
| Atlg06900 | + | + | + |   |
| Atlg06930 | + | + | + |   |
| Atlg06950 | + | + | + |   |
| Atlg06960 | + | + | + |   |
| Atlg06990 | + |   |   | + |
| Atlg07000 |   | + |   |   |
| Atlg07010 | + | + | + |   |
| Atlg07020 | + | + | + |   |
| Atlg07030 | + | + | + |   |
| Atlg07040 | + | + | + |   |
| Atlg07070 | + | + | + |   |
| Atlg07080 | + | + | + |   |
| Atlg07090 | + | + | + |   |
| Atlg07110 | + | + | + |   |
| Atlg07130 | + | + |   |   |
| Atlg07140 | + | + | + |   |
| Atlg07170 | + | + | + |   |
| Atlg07180 | + | + | + |   |
| Atlg07210 | + | + | + |   |
| Atlg07220 | + | + | + |   |
| Atlg07230 | + | + | + |   |
| Atlg07240 | + | + |   |   |
| Atlg07250 | + | + | + |   |
| Atlg07270 | + | + | + |   |
| Atlg07280 | + | + | + |   |
| Atlg07300 | + | + |   |   |
| Atlg07310 | + | + | + |   |
| Atlg07320 | + | + | + |   |
| Atlg07330 | + |   |   | + |
| Atlg07340 | + | + |   |   |
| Atlg07350 | + | + | + |   |
| Atlg07360 | + | + | + |   |
| Atlg07370 | + | + | + |   |
| Atlg07380 | + | + |   |   |
| Atlg07390 | + | + | + |   |
| Atlg07410 | + | + | + |   |
| Atlg07420 | + | + | + |   |
| Atlg07430 | + | + | + |   |
| Atlg07440 | + | + | + |   |
| Atlg07450 | + | + | + |   |
| Atlg07470 | + | + | + |   |

|           |   |   |   |   |
|-----------|---|---|---|---|
| Atlg07490 |   |   | + |   |
| Atlg07510 | + | + | + |   |
| Atlg07520 | + |   | + |   |
| Atlg07530 | + | + | + |   |
| Atlg07540 | + |   |   | + |
| Atlg07570 | + | + | + |   |
| Atlg07590 |   | + |   | + |
| Atlg07600 | + | + | + |   |
| Atlg07610 | + | + | + |   |
| Atlg07620 | + | + | + |   |
| Atlg07630 | + | + | + |   |
| Atlg07640 | + | + | + |   |
| Atlg07650 | + | + | + |   |
| Atlg07670 | + | + | + |   |
| Atlg07700 | + | + | + |   |
| Atlg07705 | + | + | + |   |
| Atlg07720 | + | + | + |   |
| Atlg07750 | + | + | + |   |
| Atlg07770 | + | + | + |   |
| Atlg07790 | + | + | + |   |
| Atlg07795 | + |   |   |   |
| Atlg07820 | + | + | + |   |
| Atlg07830 | + | + | + |   |
| Atlg07840 | + | + | + |   |
| Atlg07850 | + |   |   | + |
| Atlg07870 | + | + | + |   |
| Atlg07890 | + | + | + |   |
| Atlg07910 | + | + | + |   |
| Atlg07960 | + | + | + |   |
| Atlg07970 | + | + | + |   |
| Atlg07980 | + | + | + |   |
| Atlg07990 | + | + | + |   |
| Atlg08000 | + | + | + |   |
| Atlg08020 | + | + | + |   |
| Atlg08030 | + | + | + |   |
| Atlg08040 | + | + | + |   |
| Atlg08060 | + | + | + |   |
| Atlg08065 | + |   |   | + |
| Atlg08110 | + | + | + |   |
| Atlg08130 | + | + | + |   |
| Atlg08150 | + |   |   |   |
| Atlg08180 | + | + | + |   |
| Atlg08190 | + | + | + |   |
| Atlg08210 | + | + | + |   |
| Atlg08220 | + | + | + |   |
| Atlg08230 | + | + | + |   |
| Atlg08250 | + | + | + |   |
| Atlg08260 | + | + | + |   |
| Atlg08280 | + | + | + |   |
| Atlg08320 | + | + | + |   |
| Atlg08325 | + |   |   |   |
| Atlg08340 | + | + | + |   |

|           |   |   |   |
|-----------|---|---|---|
| Atlg08350 | + | + | + |
| Atlg08360 | + | + | + |
| Atlg08370 | + | + | + |
| Atlg08380 | + | + | + |
| Atlg08390 | + |   | + |
| Atlg08410 | + | + | + |
| Atlg08420 | + | + | + |
| Atlg08450 | + | + | + |
| Atlg08460 | + | + | + |
| Atlg08470 | + | + | + |
| Atlg08480 | + | + | + |
| Atlg08490 | + | + | + |
| Atlg08510 | + | + | + |
| Atlg08520 | + | + | + |
| Atlg08540 | + |   | + |
| Atlg08550 | + | + | + |
| Atlg08560 | + | + | + |
| Atlg08570 | + | + | + |
| Atlg08580 | + | + | + |
| Atlg08590 | + | + | + |
| Atlg08600 | + | + | + |
| Atlg08610 | + | + | + |
| Atlg08620 | + | + | + |
| Atlg08630 | + | + | + |
| Atlg08640 | + | + | + |
| Atlg08650 | + | + |   |
| Atlg08660 | + | + | + |
| Atlg08680 | + |   |   |
| Atlg08690 | + | + | + |
| Atlg08700 | + | + | + |
| Atlg08710 | + | + | + |
| Atlg08720 | + | + | + |
| Atlg08730 | + |   |   |
| Atlg08750 | + | + | + |
| Atlg08770 | + | + | + |
| Atlg08780 | + | + | + |
| Atlg08800 | + | + | + |
| Atlg08810 |   |   | + |
| Atlg08830 | + | + | + |
| Atlg08840 | + | + | + |
| Atlg08880 | + | + | + |
| Atlg08920 | + | + | + |
| Atlg08930 | + | + | + |
| Atlg08940 | + | + | + |
| Atlg08960 | + | + | + |
| Atlg08970 | + | + | + |
| Atlg08980 | + | + |   |
| Atlg09010 | + | + | + |
| Atlg09020 | + | + | + |
| Atlg09060 | + | + | + |
| Atlg09070 | + | + | + |
| Atlg09080 | + | + | + |

|           |   |   |   |   |
|-----------|---|---|---|---|
| Atlg09100 | + | + | + |   |
| Atlg09130 | + | + | + |   |
| Atlg09140 | + | + | + |   |
| Atlg09150 | + | + | + |   |
| Atlg09155 | + | + |   |   |
| Atlg09160 | + | + | + |   |
| Atlg09170 | + |   |   |   |
| Atlg09180 | + | + | + |   |
| Atlg09200 | + | + | + |   |
| Atlg09210 | + | + | + |   |
| Atlg09230 | + | + | + |   |
| Atlg09240 | + | + | + |   |
| Atlg09250 | + | + | + |   |
| Atlg09270 | + | + | + |   |
| Atlg09280 | + | + | + |   |
| Atlg09290 | + | + | + |   |
| Atlg09300 | + | + | + |   |
| Atlg09310 | + | + | + |   |
| Atlg09320 | + | + | + |   |
| Atlg09330 | + | + | + |   |
| Atlg09340 | + | + | + |   |
| Atlg09370 |   | + | + | + |
| Atlg09380 | + |   | + |   |
| Atlg09390 | + | + | + |   |
| Atlg09415 | + | + | + |   |
| Atlg09420 | + | + | + |   |
| Atlg09430 | + | + | + |   |
| Atlg09440 | + |   | + | + |
| Atlg09450 | + | + | + |   |
| Atlg09460 | + | + | + |   |
| Atlg09480 | + | + | + |   |
| Atlg09500 |   | + | + |   |
| Atlg09510 |   |   | + | + |
| Atlg09520 | + | + | + |   |
| Atlg09530 | + | + | + |   |
| Atlg09540 |   |   | + |   |
| Atlg09560 | + | + | + |   |
| Atlg09570 | + | + | + |   |
| Atlg09575 | + | + | + |   |
| Atlg09600 | + | + | + |   |
| Atlg09610 | + |   |   |   |
| Atlg09620 | + | + | + |   |
| Atlg09630 | + | + | + |   |
| Atlg09640 | + | + | + |   |
| Atlg09660 | + | + | + |   |
| Atlg09660 | + | + | + |   |
| Atlg09690 | + | + | + |   |
| Atlg09700 | + | + | + |   |
| Atlg09720 |   | + |   |   |
| Atlg09730 | + | + | + |   |
| Atlg09750 | + | + | + |   |
| Atlg09760 | + | + | + |   |

|           |   |   |   |   |
|-----------|---|---|---|---|
| Atlg09770 | + | + | + |   |
| Atlg09780 | + | + | + |   |
| Atlg09790 | + | + | + |   |
| Atlg09795 | + | + | + |   |
| Atlg09800 | + | + | + |   |
| Atlg09810 | + | + | + |   |
| Atlg09815 | + | + | + |   |
| Atlg09820 | + | + | + |   |
| Atlg09830 | + | + | + |   |
| Atlg09840 | + | + | + |   |
| Atlg09850 | + | + | + |   |
| Atlg09870 | + | + | + |   |
| Atlg09890 | + |   | + |   |
| Atlg09900 | + | + | + |   |
| Atlg09910 | + | + | + |   |
| Atlg09920 | + | + | + |   |
| Atlg09940 |   | + |   |   |
| Atlg09960 | + | + | + |   |
| Atlg09970 | + | + | + |   |
| Atlg09980 | + | + | + |   |
| Atlg09990 | + | + | + |   |
| Atlg10020 | + | + | + |   |
| Atlg10030 | + | + | + |   |
| Atlg10060 | + | + | + |   |
| Atlg10070 | + | + | + |   |
| Atlg10080 | + | + | + |   |
| Atlg10110 | + | + | + |   |
| Atlg10120 | + | + | + |   |
| Atlg10130 | + | + | + |   |
| Atlg10140 | + | + | + |   |
| Atlg10150 | + | + | + |   |
| Atlg10170 | + | + | + |   |
| Atlg10180 | + | + | + |   |
| Atlg10200 | + | + | + |   |
| Atlg10230 | + | + | + |   |
| Atlg10240 | + | + | + |   |
| Atlg10250 | + | + | + |   |
| Atlg10270 | + | + | + |   |
| Atlg10290 | + | + | + |   |
| Atlg10300 |   | + | + | + |
| Atlg10310 | + | + | + |   |
| Atlg10320 | + | + | + |   |
| Atlg10350 | + | + | + |   |
| Atlg10360 | + | + | + |   |
| Atlg10370 | + | + | + |   |
| Atlg10380 | + | + | + |   |
| Atlg10390 | + | + | + |   |
| Atlg10410 | + | + | + |   |
| Atlg10430 | + | + | + |   |
| Atlg10470 | + | + | + |   |
| Atlg10490 | + | + | + |   |
| Atlg10500 | + | + | + |   |

|           |   |   |   |   |
|-----------|---|---|---|---|
| Atlg10510 | + | + | + |   |
| Atlg10522 | + | + | + |   |
| Atlg10540 | + | + | + |   |
| Atlg10550 |   | + | + |   |
| Atlg10570 | + | + | + |   |
| Atlg10580 | + | + | + |   |
| Atlg10590 | + | + | + |   |
| Atlg10610 | + |   | + |   |
| Atlg10630 | + | + | + |   |
| Atlg10640 | + | + | + |   |
| Atlg10650 | + | + | + |   |
| Atlg10660 | + | + | + |   |
| Atlg10670 | + | + | + |   |
| Atlg10700 | + |   | + |   |
| Atlg10720 | + | + | + |   |
| Atlg10740 | + | + | + |   |
| Atlg10750 | + | + | + |   |
| Atlg10760 | + | + | + |   |
| Atlg10770 | + | + | + |   |
| Atlg10780 | + | + | + |   |
| Atlg10830 | + | + | + |   |
| Atlg10840 | + | + | + |   |
| Atlg10850 | + | + | + |   |
| Atlg10870 | + | + | + |   |
| Atlg10900 | + | + | + |   |
| Atlg10910 | + | + | + |   |
| Atlg10920 | + | + | + |   |
| Atlg10930 | + | + | + |   |
| Atlg10940 | + | + | + |   |
| Atlg10950 | + | + | + |   |
| Atlg10960 | + | + | + |   |
| Atlg10970 | + | + | + |   |
| Atlg10980 | + |   |   | + |
| Atlg11000 | + | + | + | + |
| Atlg11020 | + | + | + |   |
| Atlg11040 | + |   |   |   |
| Atlg11050 | + | + | + |   |
| Atlg11060 | + | + | + |   |
| Atlg11080 | + | + | + |   |
| Atlg11090 | + | + | + |   |
| Atlg11100 | + | + | + |   |
| Atlg11120 | + |   |   |   |
| Atlg11130 | + | + | + |   |
| Atlg11140 | + | + | + |   |
| Atlg11160 | + | + | + |   |
| Atlg11170 | + | + | + |   |
| Atlg11190 | + | + | + |   |
| Atlg11200 | + | + | + |   |
| Atlg11240 | + | + | + |   |
| Atlg11250 | + | + |   | + |
| Atlg11260 | + | + | + |   |
| Atlg11280 | + | + | + |   |

|           |   |   |   |   |
|-----------|---|---|---|---|
| Atlg11300 | + |   |   | + |
| Atlg11310 | + | + | + |   |
| Atlg11320 |   | + | + |   |
| Atlg11330 | + | + | + |   |
| Atlg11360 | + | + | + |   |
| Atlg11380 | + | + | + |   |
| Atlg11390 | + |   | + |   |
| Atlg11400 | + | + | + |   |
| Atlg11410 | + | + | + |   |
| Atlg11420 | + | + | + |   |
| Atlg11430 | + | + | + |   |
| Atlg11440 | + | + | + |   |
| Atlg11480 | + | + | + |   |
| Atlg11520 | + | + | + |   |
| Atlg11540 |   | + | + |   |
| Atlg11545 | + | + | + |   |
| Atlg11560 | + |   |   |   |
| Atlg11570 | + |   |   |   |
| Atlg11580 | + | + | + |   |
| Atlg11600 | + | + |   |   |
| Atlg11630 | + | + | + |   |
| Atlg11650 | + | + | + |   |
| Atlg11660 | + | + | + |   |
| Atlg11670 | + | + | + |   |
| Atlg11680 | + | + | + |   |
| Atlg11700 | + | + | + |   |
| Atlg11720 | + | + | + |   |
| Atlg11730 | + | + | + |   |
| Atlg11750 | + | + | + |   |
| Atlg11760 | + | + | + |   |
| Atlg11770 | + | + |   |   |
| Atlg11780 | + | + | + |   |
| Atlg11790 | + | + | + |   |
| Atlg11800 | + | + | + |   |
| Atlg11820 | + | + | + |   |
| Atlg11840 | + | + | + |   |
| Atlg11850 | + | + | + |   |
| Atlg11860 | + | + | + |   |
| Atlg11870 | + | + | + |   |
| Atlg11880 | + |   | + |   |
| Atlg11890 | + | + | + |   |
| Atlg11900 | + | + | + |   |
| Atlg11910 | + | + | + |   |
| Atlg11930 | + | + | + |   |
| Atlg11940 | + | + | + |   |
| Atlg11950 | + | + | + |   |
| Atlg11960 | + | + | + |   |
| Atlg11990 | + | + |   | + |
| Atlg12000 | + | + | + |   |
| Atlg12010 |   |   | + |   |
| Atlg12020 | + | + | + |   |
| Atlg12050 | + | + | + |   |

|           |   |   |   |   |
|-----------|---|---|---|---|
| Atlg12070 | + | + | + | + |
| Atlg12080 | + | + | + |   |
| Atlg12090 | + | + | + |   |
| Atlg12110 |   | + |   |   |
| Atlg12120 | + | + | + |   |
| Atlg12140 | + | + | + |   |
| Atlg12200 | + | + | + |   |
| Atlg12230 | + | + | + |   |
| Atlg12240 | + | + | + |   |
| Atlg12250 | + | + | + |   |
| Atlg12270 | + | + | + |   |
| Atlg12310 | + | + | + |   |
| Atlg12320 | + | + | + |   |
| Atlg12330 | + | + | + |   |
| Atlg12340 | + | + | + |   |
| Atlg12360 | + | + | + |   |
| Atlg12370 | + | + | + |   |
| Atlg12410 | + | + | + |   |
| Atlg12430 | + | + | + |   |
| Atlg12450 | + | + | + |   |
| Atlg12460 | + | + | + |   |
| Atlg12470 | + | + | + |   |
| Atlg12500 | + | + | + |   |
| Atlg12520 | + | + | + |   |
| Atlg12530 | + | + | + |   |
| Atlg12550 | + | + |   |   |
| Atlg12570 | + | + | + | + |
| Atlg12580 | + | + | + |   |
| Atlg12600 | + |   |   | + |
| Atlg12620 | + | + |   |   |
| Atlg12640 | + | + | + |   |
| Atlg12650 | + | + | + |   |
| Atlg12680 | + | + | + |   |
| Atlg12710 | + | + | + |   |
| Atlg12730 | + |   | + |   |
| Atlg12750 |   | + | + |   |
| Atlg12780 | + | + | + |   |
| Atlg12790 | + | + | + |   |
| Atlg12800 | + | + | + |   |
| Atlg12810 | + | + | + |   |
| Atlg12820 | + | + | + |   |
| Atlg12830 | + | + | + |   |
| Atlg12840 | + | + | + |   |
| Atlg12845 | + | + | + |   |
| Atlg12850 | + | + | + |   |
| Atlg12860 | + | + | + |   |
| Atlg12880 | + | + | + |   |
| Atlg12900 | + | + | + |   |
| Atlg12910 | + | + | + |   |
| Atlg12930 | + | + | + |   |
| Atlg12970 | + | + | + |   |
| Atlg12990 | + | + | + |   |



|           |   |   |   |   |
|-----------|---|---|---|---|
| Atlg13000 | + | + | + |   |
| Atlg13020 | + | + | + |   |
| Atlg13030 | + | + | + |   |
| Atlg13050 |   |   | + |   |
| Atlg13060 | + | + | + |   |
| Atlg13070 |   | + |   | + |
| Atlg13080 | + | + | + |   |
| Atlg13090 | + | + | + |   |
| Atlg13110 | + | + |   |   |
| Atlg13120 | + | + | + |   |
| Atlg13130 | + |   | + | + |
| Atlg13140 | + |   |   |   |
| Atlg13150 | + |   |   | + |
| Atlg13160 | + | + | + |   |
| Atlg13170 | + | + | + |   |
| Atlg13180 | + | + | + |   |
| Atlg13190 | + | + | + |   |
| Atlg13195 | + | + | + |   |
| Atlg13210 | + |   |   |   |
| Atlg13220 | + | + | + | + |
| Atlg13230 | + | + | + |   |
| Atlg13250 | + | + | + |   |
| Atlg13260 | + | + | + |   |
| Atlg13270 | + | + | + |   |
| Atlg13280 | + | + | + |   |
| Atlg13290 | + |   |   |   |
| Atlg13320 | + | + | + |   |
| Atlg13330 |   | + |   |   |
| Atlg13350 | + | + | + |   |
| Atlg13380 | + | + | + |   |
| Atlg13440 | + | + | + |   |
| Atlg13450 | + | + | + |   |
| Atlg13460 | + | + | + |   |
| Atlg13470 |   | + |   |   |
| Atlg13560 | + | + | + |   |
| Atlg13570 | + | + | + |   |
| Atlg13580 | + | + | + |   |
| Atlg13600 | + | + | + |   |
| Atlg13640 | + | + | + |   |
| Atlg13650 | + | + | + |   |
| Atlg13680 |   |   | + | + |
| Atlg13690 | + | + | + |   |
| Atlg13730 | + | + | + |   |
| Atlg13740 | + | + | + |   |
| Atlg13750 | + | + | + |   |
| Atlg13790 | + | + | + |   |
| Atlg13810 | + | + | + |   |
| Atlg13830 | + |   | + |   |
| Atlg13870 | + | + | + |   |
| Atlg13880 | + | + | + |   |
| Atlg13890 | + | + |   | + |
| Atlg13900 | + | + | + |   |

|           |   |   |   |   |
|-----------|---|---|---|---|
| Atlg13910 | + | + |   |   |
| Atlg13920 | + |   | + |   |
| Atlg13930 | + | + | + |   |
| Atlg13940 | + | + | + |   |
| Atlg13950 | + |   |   |   |
| Atlg13960 | + | + | + |   |
| Atlg13970 | + | + | + |   |
| Atlg13980 | + | + | + |   |
| Atlg13990 | + | + | + |   |
| Atlg14000 | + | + | + |   |
| Atlg14020 | + | + | + |   |
| Atlg14030 | + | + | + |   |
| Atlg14040 | + | + | + |   |
| Atlg14050 |   | + | + |   |
| Atlg14090 | + | + | + |   |
| Atlg14130 | + | + | + |   |
| Atlg14140 | + | + | + |   |
| Atlg14150 | + | + | + |   |
| Atlg14180 | + |   | + | + |
| Atlg14200 | + | + | + |   |
| Atlg14210 | + | + | + |   |
| Atlg14240 | + | + | + |   |
| Atlg14250 | + | + | + |   |
| Atlg14260 | + | + | + |   |
| Atlg14270 | + | + | + |   |
| Atlg14280 | + | + | + |   |
| Atlg14290 | + | + | + |   |
| Atlg14300 | + | + | + |   |
| Atlg14310 | + | + | + |   |
| Atlg14320 | + | + | + |   |
| Atlg14330 | + | + | + |   |
| Atlg14340 | + | + | + |   |
| Atlg14345 | + | + | + |   |
| Atlg14350 | + | + | + |   |
| Atlg14360 | + | + | + |   |
| Atlg14380 | + | + | + |   |
| Atlg14400 | + | + | + |   |
| Atlg14410 | + | + | + |   |
| Atlg14420 | + | + | + | + |
| Atlg14440 | + | + | + |   |
| Atlg14450 | + | + | + |   |
| Atlg14460 | + | + | + |   |
| Atlg14480 | + | + | + |   |
| Atlg14510 | + | + | + |   |
| Atlg14520 | + |   |   |   |
| Atlg14530 | + | + | + |   |
| Atlg14560 | + | + | + |   |
| Atlg14570 | + | + | + |   |
| Atlg14580 | + |   | + |   |
| Atlg14610 | + | + | + |   |
| Atlg14620 | + | + | + |   |
| Atlg14640 | + |   |   |   |

|           |   |   |   |   |
|-----------|---|---|---|---|
| Atlg14650 | + | + | + |   |
| Atlg14670 | + | + | + |   |
| Atlg14680 | + |   |   | + |
| Atlg14685 | + | + | + |   |
| Atlg14700 | + | + | + |   |
| Atlg14710 | + | + | + |   |
| Atlg14720 | + | + | + |   |
| Atlg14730 |   | + | + |   |
| Atlg14740 | + | + | + |   |
| Atlg14770 | + | + | + |   |
| Atlg14780 | + | + | + |   |
| Atlg14790 | + | + | + |   |
| Atlg14810 | + | + | + |   |
| Atlg14820 | + | + | + |   |
| Atlg14830 | + | + | + |   |
| Atlg14840 | + | + | + |   |
| Atlg14850 | + | + | + |   |
| Atlg14870 | + | + | + |   |
| Atlg14890 | + | + | + |   |
| Atlg14900 | + | + | + |   |
| Atlg14910 | + | + | + |   |
| Atlg14920 | + | + | + |   |
| Atlg14980 | + | + | + |   |
| Atlg14990 | + | + | + |   |
| Atlg15000 | + | + | + |   |
| Atlg15020 | + |   | + |   |
| Atlg15060 | + | + | + |   |
| Atlg15100 | + | + | + |   |
| Atlg15110 | + | + | + |   |
| Atlg15120 | + | + | + |   |
| Atlg15130 | + | + | + |   |
| Atlg15140 | + | + | + |   |
| Atlg15170 | + | + | + |   |
| Atlg15180 | + | + |   |   |
| Atlg15200 | + | + | + |   |
| Atlg15220 | + |   | + |   |
| Atlg15230 | + | + | + |   |
| Atlg15250 | + | + | + |   |
| Atlg15260 | + | + | + |   |
| Atlg15270 | + | + | + |   |
| Atlg15280 | + | + | + |   |
| Atlg15290 | + | + | + |   |
| Atlg15310 | + | + | + |   |
| Atlg15330 | + | + | + |   |
| Atlg15340 | + | + | + |   |
| Atlg15350 | + | + | + |   |
| Atlg15360 | + |   |   | + |
| Atlg15370 | + | + | + |   |
| Atlg15380 | + | + | + |   |
| Atlg15390 | + | + | + |   |
| Atlg15400 | + | + | + |   |
| Atlg15410 | + | + | + |   |

|           |   |   |   |
|-----------|---|---|---|
| Atlg15425 | + | + | + |
| Atlg15430 | + | + | + |
| Atlg15440 | + | + | + |
| Atlg15460 | + |   |   |
| Atlg15470 | + | + | + |
| Atlg15490 | + | + | + |
| Atlg15500 | + | + | + |
| Atlg15510 | + | + | + |
| Atlg15520 |   | + |   |
| Atlg15550 |   | + | + |
| Atlg15570 | + | + | + |
| Atlg15600 | + | + | + |
| Atlg15660 | + | + | + |
| Atlg15670 | + | + | + |
| Atlg15690 | + | + | + |
| Atlg15700 | + | + | + |
| Atlg15710 | + | + | + |
| Atlg15730 | + | + | + |
| Atlg15740 | + | + | + |
| Atlg15750 | + | + | + |
| Atlg15780 | + | + | + |
| Atlg15790 |   | + |   |
| Atlg15800 | + | + | + |
| Atlg15810 | + | + | + |
| Atlg15820 | + | + | + |
| Atlg15860 | + | + | + |
| Atlg15870 | + | + | + |
| Atlg15880 | + | + | + |
| Atlg15910 | + | + | + |
| Atlg15920 | + | + | + |
| Atlg15930 | + | + | + |
| Atlg15940 | + | + | + |
| Atlg15950 | + | + | + |
| Atlg15980 | + | + | + |
| Atlg16000 | + | + | + |
| Atlg16010 | + | + | + |
| Atlg16020 | + | + | + |
| Atlg16030 |   | + | + |
| Atlg16040 | + | + | + |
| Atlg16050 | + |   |   |
| Atlg16060 | + | + | + |
| Atlg16070 | + | + | + |
| Atlg16080 | + | + | + |
| Atlg16170 | + | + | + |
| Atlg16180 | + | + | + |
| Atlg16190 | + | + | + |
| Atlg16210 | + | + | + |
| Atlg16220 | + |   |   |
| Atlg16240 | + | + | + |
| Atlg16260 |   |   | + |
| Atlg16280 | + | + | + |
| Atlg16290 | + | + | + |

|           |   |   |   |   |
|-----------|---|---|---|---|
| Atlg16310 | + |   |   |   |
| Atlg16330 | + | + | + |   |
| Atlg16340 | + | + | + |   |
| Atlg16350 | + | + | + |   |
| Atlg16360 | + | + |   |   |
| Atlg16390 |   |   | + |   |
| Atlg16430 | + | + | + |   |
| Atlg16460 | + | + | + |   |
| Atlg16470 | + | + | + |   |
| Atlg16490 |   | + | + |   |
| Atlg16500 | + | + | + |   |
| Atlg16510 | + | + | + |   |
| Atlg16520 | + | + | + |   |
| Atlg16540 | + | + | + |   |
| Atlg16570 | + | + | + |   |
| Atlg16570 | + | + | + |   |
| Atlg16590 | + | + | + |   |
| Atlg16610 | + | + | + |   |
| Atlg16640 | + | + | + |   |
| Atlg16650 | + | + |   |   |
| Atlg16670 | + | + | + |   |
| Atlg16680 | + | + | + |   |
| Atlg16690 | + |   | + |   |
| Atlg16705 | + | + | + | + |
| Atlg16710 | + | + | + |   |
| Atlg16720 | + | + | + |   |
| Atlg16740 | + | + | + |   |
| Atlg16750 | + | + | + |   |
| Atlg16760 | + | + |   | + |
| Atlg16780 | + | + | + |   |
| Atlg16790 | + | + | + |   |
| Atlg16800 |   | + | + |   |
| Atlg16810 | + | + | + |   |
| Atlg16820 | + | + |   |   |
| Atlg16840 | + | + | + |   |
| Atlg16860 | + | + | + |   |
| Atlg16870 | + | + | + |   |
| Atlg16880 | + | + | + |   |
| Atlg16900 | + | + | + |   |
| Atlg16920 | + | + | + |   |
| Atlg16940 |   |   | + |   |
| Atlg16950 |   | + |   | + |
| Atlg16970 | + | + | + |   |
| Atlg16980 |   |   | + |   |
| Atlg17020 |   | + | + |   |
| Atlg17040 | + | + |   |   |
| Atlg17050 | + | + | + |   |
| Atlg17070 | + | + | + |   |
| Atlg17080 | + | + | + |   |
| Atlg17100 | + | + | + |   |
| Atlg17110 | + | + | + |   |
| Atlg17120 | + | + | + |   |

|           |   |   |   |   |
|-----------|---|---|---|---|
| Atlg17130 | + | + | + |   |
| Atlg17140 | + | + | + |   |
| Atlg17145 | + | + | + |   |
| Atlg17160 | + | + | + |   |
| Atlg17190 | + | + |   |   |
| Atlg17200 | + | + | + |   |
| Atlg17210 | + | + | + |   |
| Atlg17220 | + | + | + |   |
| Atlg17260 | + | + | + |   |
| Atlg17280 | + | + | + |   |
| Atlg17290 | + | + | + |   |
| Atlg17330 | + |   | + |   |
| Atlg17340 | + | + | + |   |
| Atlg17350 | + | + | + |   |
| Atlg17360 | + | + | + |   |
| Atlg17370 | + | + | + |   |
| Atlg17380 | + | + | + |   |
| Atlg17410 | + | + | + |   |
| Atlg17420 | + | + | + |   |
| Atlg17430 | + | + | + |   |
| Atlg17440 | + | + | + |   |
| Atlg17450 | + | + | + |   |
| Atlg17455 | + |   | + |   |
| Atlg17460 | + | + | + |   |
| Atlg17470 | + | + | + |   |
| Atlg17480 | + |   | + |   |
| Atlg17490 | + | + | + |   |
| Atlg17500 | + | + | + |   |
| Atlg17510 | + | + | + |   |
| Atlg17520 | + | + | + |   |
| Atlg17530 | + | + | + |   |
| Atlg17540 | + | + | + | + |
| Atlg17550 | + | + | + |   |
| Atlg17560 | + | + | + |   |
| Atlg17580 | + | + | + |   |
| Atlg17620 | + | + | + |   |
| Atlg17640 | + | + | + |   |
| Atlg17650 | + | + | + |   |
| Atlg17680 | + | + | + |   |
| Atlg17690 | + | + | + |   |
| Atlg17700 | + | + | + |   |
| Atlg17710 | + |   |   |   |
| Atlg17720 | + | + | + |   |
| Atlg17730 | + | + | + |   |
| Atlg17745 | + | + | + |   |
| Atlg17750 |   |   | + |   |
| Atlg17760 | + | + | + |   |
| Atlg17790 | + | + | + |   |
| Atlg17840 | + | + | + |   |
| Atlg17850 | + | + | + |   |
| Atlg17860 |   | + | + |   |
| Atlg17880 | + | + | + |   |

|           |   |   |   |   |
|-----------|---|---|---|---|
| Atlg17890 | + |   | + |   |
| Atlg17920 | + | + | + |   |
| Atlg17930 | + | + | + |   |
| Atlg17950 | + |   |   |   |
| Atlg17970 | + | + | + |   |
| Atlg17980 | + | + | + |   |
| Atlg17990 | + | + | + |   |
| Atlg18010 | + | + | + |   |
| Atlg18030 | + | + | + |   |
| Atlg18040 | + | + | + |   |
| Atlg18060 | + | + | + |   |
| Atlg18070 | + | + | + |   |
| Atlg18080 | + | + | + |   |
| Atlg18090 | + | + | + |   |
| Atlg18150 | + | + | + |   |
| Atlg18160 | + | + | + |   |
| Atlg18170 | + | + | + |   |
| Atlg18180 | + | + | + |   |
| Atlg18190 | + | + | + |   |
| Atlg18200 | + |   |   |   |
| Atlg18210 | + | + | + |   |
| Atlg18250 | + | + | + |   |
| Atlg18260 | + | + | + |   |
| Atlg18270 | + | + | + |   |
| Atlg18280 | + | + |   | + |
| Atlg18320 | + | + | + |   |
| Atlg18330 | + | + | + |   |
| Atlg18340 | + | + | + |   |
| Atlg18360 | + | + | + |   |
| Atlg18370 | + | + | + |   |
| Atlg18390 | + | + | + |   |
| Atlg18400 | + | + | + |   |
| Atlg18440 | + | + | + |   |
| Atlg18450 | + | + | + |   |
| Atlg18460 | + | + | + |   |
| Atlg18470 | + | + | + |   |
| Atlg18480 | + | + | + |   |
| Atlg18490 | + | + | + |   |
| Atlg18500 | + | + | + |   |
| Atlg18520 | + |   |   | + |
| Atlg18540 | + | + | + |   |
| Atlg18560 |   | + | + |   |
| Atlg18580 | + |   | + |   |
| Atlg18590 |   |   | + |   |
| Atlg18600 | + | + | + |   |
| Atlg18610 | + | + | + |   |
| Atlg18620 | + | + | + |   |
| Atlg18630 | + | + | + |   |
| Atlg18640 | + | + | + |   |
| Atlg18650 | + | + | + |   |
| Atlg18660 | + | + | + |   |
| Atlg18670 | + |   | + |   |

|           |   |   |   |   |
|-----------|---|---|---|---|
| Atlg18690 | + |   |   |   |
| Atlg18700 | + | + | + |   |
| Atlg18720 | + | + | + |   |
| Atlg18730 | + | + | + |   |
| Atlg18740 | + | + | + |   |
| Atlg18750 | + | + |   |   |
| Atlg18800 | + | + | + |   |
| Atlg18810 |   | + |   |   |
| Atlg18840 | + | + | + |   |
| Atlg18850 | + | + | + |   |
| Atlg18870 | + |   | + |   |
| Atlg18880 | + | + | + |   |
| Atlg18890 | + | + | + |   |
| Atlg18900 | + | + | + | + |
| Atlg18950 | + | + | + |   |
| Atlg18990 | + | + | + | + |
| Atlg19000 | + | + | + |   |
| Atlg19010 | + | + | + |   |
| Atlg19020 |   | + |   |   |
| Atlg19025 |   |   | + |   |
| Atlg19050 | + | + | + |   |
| Atlg19080 | + | + | + |   |
| Atlg19100 | + | + | + |   |
| Atlg19110 | + | + | + |   |
| Atlg19120 | + | + | + |   |
| Atlg19130 | + | + | + |   |
| Atlg19140 | + | + | + |   |
| Atlg19150 | + | + | + |   |
| Atlg19160 |   |   | + |   |
| Atlg19170 | + | + | + |   |
| Atlg19180 | + | + | + |   |
| Atlg19220 | + | + | + |   |
| Atlg19230 | + |   |   |   |
| Atlg19240 | + | + | + |   |
| Atlg19270 | + | + | + |   |
| Atlg19290 | + |   |   | + |
| Atlg19300 | + | + | + |   |
| Atlg19310 | + | + | + |   |
| Atlg19330 | + | + | + |   |
| Atlg19350 | + | + | + |   |
| Atlg19360 | + | + | + |   |
| Atlg19380 | + | + | + |   |
| Atlg19430 | + | + | + |   |
| Atlg19440 | + | + | + |   |
| Atlg19450 | + | + | + |   |
| Atlg19480 | + | + | + |   |
| Atlg19485 | + | + | + |   |
| Atlg19500 | + | + | + | + |
| Atlg19510 | + | + |   |   |
| Atlg19520 | + | + | + |   |
| Atlg19525 | + | + | + |   |
| Atlg19540 | + | + | + |   |



|           |   |   |   |   |
|-----------|---|---|---|---|
| Atlg19570 | + | + | + |   |
| Atlg19580 | + | + | + |   |
| Atlg19600 | + | + | + |   |
| Atlg19640 | + | + | + | + |
| Atlg19650 | + | + | + |   |
| Atlg19660 | + | + | + |   |
| Atlg19670 | + | + | + |   |
| Atlg19680 | + | + | + |   |
| Atlg19690 | + | + | + |   |
| Atlg19700 | + | + | + |   |
| Atlg19710 | + | + | + |   |
| Atlg19720 | + | + | + |   |
| Atlg19730 | + | + | + |   |
| Atlg19740 | + | + | + |   |
| Atlg19770 | + | + | + |   |
| Atlg19800 | + | + | + |   |
| Atlg19830 | + | + | + | + |
| Atlg19835 | + | + | + |   |
| Atlg19850 | + | + | + |   |
| Atlg19860 | + | + | + |   |
| Atlg19870 | + | + | + |   |
| Atlg19880 | + | + | + |   |
| Atlg19890 | + | + |   | + |
| Atlg19920 | + | + | + |   |
| Atlg19940 | + | + | + |   |
| Atlg19950 | + | + | + |   |
| Atlg19960 | + |   |   |   |
| Atlg19970 | + | + | + |   |
| Atlg19980 | + | + | + |   |
| Atlg20010 | + | + | + |   |
| Atlg20020 | + | + | + |   |
| Atlg20030 | + |   |   |   |
| Atlg20050 | + | + | + |   |
| Atlg20070 | + | + | + |   |
| Atlg20080 | + |   |   | + |
| Atlg20090 | + | + | + |   |
| Atlg20100 | + | + | + |   |
| Atlg20110 | + | + | + |   |
| Atlg20120 | + | + |   | + |
| Atlg20130 | + |   |   |   |
| Atlg20150 | + |   |   |   |
| Atlg20160 | + | + | + |   |
| Atlg20180 | + | + | + | + |
| Atlg20190 | + | + |   |   |
| Atlg20200 | + | + | + |   |
| Atlg20220 | + | + | + |   |
| Atlg20230 | + | + | + |   |
| Atlg20270 | + | + | + |   |
| Atlg20300 | + | + | + |   |
| Atlg20310 | + |   |   |   |
| Atlg20330 | + | + | + |   |
| Atlg20340 | + | + | + |   |

|           |   |   |   |
|-----------|---|---|---|
| Atlg20350 | + | + | + |
| Atlg20370 | + | + | + |
| Atlg20380 | + | + | + |
| Atlg20410 | + | + | + |
| Atlg20430 | + | + | + |
| Atlg20440 | + | + | + |
| Atlg20450 | + | + | + |
| Atlg20510 | + | + | + |
| Atlg20540 | + | + | + |
| Atlg20550 | + | + | + |
| Atlg20560 | + | + | + |
| Atlg20575 | + | + | + |
| Atlg20580 | + | + | + |
| Atlg20590 | + | + | + |
| Atlg20620 | + | + | + |
| Atlg20630 | + | + | + |
| Atlg20640 | + | + | + |
| Atlg20650 | + | + | + |
| Atlg20670 | + | + | + |
| Atlg20693 | + | + | + |
| Atlg20696 | + | + | + |
| Atlg20700 | + |   |   |
| Atlg20760 | + | + | + |
| Atlg20770 | + | + | + |
| Atlg20780 |   | + |   |
| Atlg20810 | + | + | + |
| Atlg20816 | + | + |   |
| Atlg20823 | + | + | + |
| Atlg20830 | + | + | + |
| Atlg20840 | + | + | + |
| Atlg20850 | + | + | + |
| Atlg20870 | + |   | + |
| Atlg20880 | + | + | + |
| Atlg20890 | + | + | + |
| Atlg20910 | + | + | + |
| Atlg20920 | + | + | + |
| Atlg20930 | + | + | + |
| Atlg20940 |   |   | + |
| Atlg20950 | + | + | + |
| Atlg20960 | + | + | + |
| Atlg20980 | + | + | + |
| Atlg21000 | + | + |   |
| Atlg21010 | + | + | + |
| Atlg21050 | + | + | + |
| Atlg21065 | + | + | + |
| Atlg21070 | + | + | + |
| Atlg21080 | + | + | + |
| Atlg21090 | + | + | + |
| Atlg21140 | + | + | + |
| Atlg21160 | + | + | + |
| Atlg21170 | + |   | + |
| Atlg21190 | + | + | + |

|           |   |   |   |   |
|-----------|---|---|---|---|
| Atlg21200 | + | + | + |   |
| Atlg21250 | + | + | + |   |
| Atlg21270 | + |   |   |   |
| Atlg21350 | + | + | + |   |
| Atlg21370 | + | + | + |   |
| Atlg21380 | + | + | + |   |
| Atlg21400 | + | + | + |   |
| Atlg21410 | + | + | + |   |
| Atlg21440 | + | + | + |   |
| Atlg21450 | + | + | + |   |
| Atlg21460 | + | + | + |   |
| Atlg21480 | + | + | + |   |
| Atlg21500 | + | + | + |   |
| Atlg21540 | + |   |   | + |
| Atlg21550 | + | + |   |   |
| Atlg21560 | + | + | + |   |
| Atlg21570 | + | + | + |   |
| Atlg21580 | + |   | + |   |
| Atlg21590 | + | + | + |   |
| Atlg21600 | + | + | + |   |
| Atlg21610 | + | + | + |   |
| Atlg21630 | + | + | + |   |
| Atlg21640 | + | + | + |   |
| Atlg21650 | + | + | + |   |
| Atlg21660 | + | + | + |   |
| Atlg21670 | + | + | + |   |
| Atlg21680 | + | + | + |   |
| Atlg21690 | + | + | + |   |
| Atlg21700 | + | + | + |   |
| Atlg21710 | + | + | + |   |
| Atlg21720 | + | + | + |   |
| Atlg21740 | + |   |   |   |
| Atlg21750 | + | + | + |   |
| Atlg21760 | + | + | + |   |
| Atlg21770 | + | + | + |   |
| Atlg21780 | + | + | + |   |
| Atlg21790 | + | + | + |   |
| Atlg21820 | + | + | + |   |
| Atlg21830 | + | + | + |   |
| Atlg21840 | + | + | + |   |
| Atlg21850 |   |   | + | + |
| Atlg21880 | + | + | + |   |
| Atlg21900 | + | + | + |   |
| Atlg21910 | + | + | + |   |
| Atlg21920 | + | + | + |   |
| Atlg21980 | + | + | + |   |
| Atlg22015 | + | + |   | + |
| Atlg22020 | + | + | + |   |
| Atlg22030 | + | + | + |   |
| Atlg22040 | + | + | + |   |
| Atlg22050 | + | + | + |   |
| Atlg22060 | + | + | + |   |

|           |   |   |   |   |
|-----------|---|---|---|---|
| Atlg22070 | + | + | + |   |
| Atlg22110 | + |   |   | + |
| Atlg22130 | + |   |   | + |
| Atlg22140 | + | + | + |   |
| Atlg22150 | + |   |   | + |
| Atlg22160 | + | + | + |   |
| Atlg22170 | + | + | + |   |
| Atlg22180 | + |   | + |   |
| Atlg22190 | + | + | + |   |
| Atlg22200 | + | + | + |   |
| Atlg22210 |   |   | + |   |
| Atlg22240 | + | + | + |   |
| Atlg22270 | + | + | + |   |
| Atlg22280 | + | + | + |   |
| Atlg22300 | + | + | + |   |
| Atlg22310 | + | + | + |   |
| Atlg22330 |   | + | + |   |
| Atlg22335 | + | + | + |   |
| Atlg22380 | + | + |   |   |
| Atlg22400 | + | + | + |   |
| Atlg22410 | + | + | + |   |
| Atlg22430 | + | + | + |   |
| Atlg22450 | + | + | + |   |
| Atlg22460 | + | + | + |   |
| Atlg22490 | + | + | + |   |
| Atlg22510 | + | + | + |   |
| Atlg22520 | + | + | + |   |
| Atlg22530 | + | + | + |   |
| Atlg22540 | + | + | + |   |
| Atlg22550 | + | + | + |   |
| Atlg22590 | + | + | + |   |
| Atlg22610 | + | + | + |   |
| Atlg22620 | + | + | + |   |
| Atlg22630 | + | + | + |   |
| Atlg22640 | + | + | + |   |
| Atlg22650 | + |   |   |   |
| Atlg22660 | + | + | + |   |
| Atlg22690 | + | + | + |   |
| Atlg22700 | + | + | + |   |
| Atlg22710 | + | + | + |   |
| Atlg22720 | + |   |   |   |
| Atlg22730 | + | + | + |   |
| Atlg22740 | + | + | + |   |
| Atlg22750 | + | + | + |   |
| Atlg22760 | + | + | + | + |
| Atlg22770 | + | + | + |   |
| Atlg22780 | + | + | + |   |
| Atlg22790 | + | + | + |   |
| Atlg22800 | + | + | + |   |
| Atlg22830 | + |   |   |   |
| Atlg22840 | + | + | + |   |
| Atlg22850 | + | + | + |   |

|           |   |   |   |   |
|-----------|---|---|---|---|
| Atlg22860 | + | + | + |   |
| Atlg22870 | + | + | + |   |
| Atlg22885 | + | + | + |   |
| Atlg22890 | + | + | + |   |
| Atlg22910 | + | + | + |   |
| Atlg22920 | + | + | + |   |
| Atlg22930 | + | + | + |   |
| Atlg22940 | + | + | + |   |
| Atlg22970 | + | + | + |   |
| Atlg22985 | + | + | + |   |
| Atlg22990 |   | + |   |   |
| Atlg23000 | + | + |   |   |
| Atlg23010 | + | + | + |   |
| Atlg23020 | + | + |   |   |
| Atlg23030 | + | + | + |   |
| Atlg23040 | + | + | + |   |
| Atlg23060 | + | + | + |   |
| Atlg23070 | + |   |   |   |
| Atlg23080 | + | + | + |   |
| Atlg23090 | + | + | + |   |
| Atlg23100 | + | + | + |   |
| Atlg23130 | + | + |   |   |
| Atlg23140 | + |   | + |   |
| Atlg23180 | + | + | + |   |
| Atlg23190 | + | + | + |   |
| Atlg23200 | + | + |   |   |
| Atlg23205 | + | + | + |   |
| Atlg23220 | + | + | + |   |
| Atlg23230 | + | + | + |   |
| Atlg23240 | + | + |   |   |
| Atlg23250 | + |   |   | + |
| Atlg23260 | + | + | + |   |
| Atlg23280 | + | + | + |   |
| Atlg23290 | + | + | + |   |
| Atlg23310 | + | + | + |   |
| Atlg23330 | + | + | + |   |
| Atlg23340 | + | + | + |   |
| Atlg23350 | + | + | + | + |
| Atlg23360 | + | + | + |   |
| Atlg23380 | + |   |   |   |
| Atlg23380 | + |   |   |   |
| Atlg23390 | + | + | + |   |
| Atlg23400 | + | + | + |   |
| Atlg23410 | + | + | + |   |
| Atlg23420 | + | + | + | + |
| Atlg23430 | + | + | + |   |
| Atlg23440 | + | + |   |   |
| Atlg23450 | + |   |   |   |
| Atlg23460 | + | + | + |   |
| Atlg23480 | + | + | + |   |
| Atlg23490 | + | + | + |   |
| Atlg23510 | + |   |   | + |

|           |   |   |   |   |
|-----------|---|---|---|---|
| Atlg23520 | + |   |   | + |
| Atlg23530 |   |   | + |   |
| Atlg23550 | + | + | + |   |
| Atlg23560 | + |   |   |   |
| Atlg23570 | + | + |   | + |
| Atlg23580 | + |   |   | + |
| Atlg23590 | + |   |   | + |
| Atlg23600 | + |   |   | + |
| Atlg23670 | + |   |   |   |
| Atlg23690 | + |   |   |   |
| Atlg23700 | + |   |   |   |
| Atlg23710 | + | + | + |   |
| Atlg23730 | + | + | + |   |
| Atlg23740 | + | + | + |   |
| Atlg23750 | + | + | + |   |
| Atlg23760 | + | + |   |   |
| Atlg23780 | + | + | + |   |
| Atlg23800 | + |   |   |   |
| Atlg23810 | + |   |   |   |
| Atlg23820 | + | + | + |   |
| Atlg23860 | + | + | + |   |
| Atlg23870 | + | + | + |   |
| Atlg23880 | + | + |   |   |
| Atlg23890 | + | + | + |   |
| Atlg23940 | + | + | + |   |
| Atlg23950 | + | + | + |   |
| Atlg23960 | + | + | + |   |
| Atlg23980 | + | + | + |   |
| Atlg24000 |   |   | + | + |
| Atlg24010 |   | + | + | + |
| Atlg24020 | + | + | + |   |
| Atlg24040 | + |   |   |   |
| Atlg24040 | + | + | + |   |
| Atlg24050 | + | + | + |   |
| Atlg24070 | + | + | + |   |
| Atlg24090 | + | + | + |   |
| Atlg24100 | + | + | + |   |
| Atlg24110 |   | + |   | + |
| Atlg24120 | + | + | + |   |
| Atlg24140 | + |   |   |   |
| Atlg24150 | + |   | + |   |
| Atlg24170 | + | + | + |   |
| Atlg24180 | + | + | + |   |
| Atlg24190 | + | + | + |   |
| Atlg24240 | + | + | + |   |
| Atlg24260 | + | + | + |   |
| Atlg24280 | + | + | + |   |
| Atlg24310 | + | + | + |   |
| Atlg24330 | + | + | + |   |
| Atlg24340 | + | + | + |   |
| Atlg24350 | + | + | + |   |
| Atlg24360 | + | + | + |   |

|           |   |   |   |   |
|-----------|---|---|---|---|
| Atlg24400 | + | + |   |   |
| Atlg24440 | + | + | + |   |
| Atlg24450 | + | + | + |   |
| Atlg24460 | + | + | + |   |
| Atlg24470 | + | + | + |   |
| Atlg24490 | + | + | + |   |
| Atlg24510 | + | + | + |   |
| Atlg24520 | + | + | + |   |
| Atlg24530 | + | + | + |   |
| Atlg24540 |   | + | + | + |
| Atlg24560 | + | + | + |   |
| Atlg24575 | + | + | + |   |
| Atlg24600 | + | + | + |   |
| Atlg24610 | + | + | + |   |
| Atlg24620 | + | + |   |   |
| Atlg24706 | + | + | + |   |
| Atlg24764 | + | + | + |   |
| Atlg25170 | + | + | + |   |
| Atlg25190 | + | + | + |   |
| Atlg25220 | + | + | + |   |
| Atlg25230 | + | + | + |   |
| Atlg25240 | + | + | + |   |
| Atlg25250 | + | + | + |   |
| Atlg25260 | + | + | + |   |
| Atlg25275 | + | + | + |   |
| Atlg25280 | + | + | + |   |
| Atlg25290 | + | + | + |   |
| Atlg25320 | + | + | + |   |
| Atlg25330 | + | + | + | + |
| Atlg25340 | + |   |   | + |
| Atlg25350 | + | + | + |   |
| Atlg25360 | + |   |   |   |
| Atlg25370 | + | + | + |   |
| Atlg25375 | + | + | + |   |
| Atlg25380 | + | + | + |   |
| Atlg25390 | + | + | + |   |
| Atlg25420 | + | + | + |   |
| Atlg25450 | + | + | + |   |
| Atlg25460 |   |   | + |   |
| Atlg25470 | + | + | + |   |
| Atlg25490 | + | + | + |   |
| Atlg25500 | + | + | + |   |
| Atlg25510 | + | + | + |   |
| Atlg25520 | + | + | + |   |
| Atlg25530 | + | + | + |   |
| Atlg25540 | + | + | + |   |
| Atlg25550 | + | + | + |   |
| Atlg25560 | + | + | + |   |
| Atlg25570 | + | + | + |   |
| Atlg25580 | + | + | + |   |
| Atlg25988 | + | + | + |   |
| Atlg26090 | + | + | + |   |

|           |   |   |   |   |
|-----------|---|---|---|---|
| Atlg26100 | + | + | + |   |
| Atlg26110 | + | + | + |   |
| Atlg26130 | + | + | + |   |
| Atlg26150 | + | + | + |   |
| Atlg26160 | + | + | + |   |
| Atlg26170 | + | + | + |   |
| Atlg26180 | + | + | + |   |
| Atlg26190 | + | + | + |   |
| Atlg26210 | + | + |   |   |
| Atlg26220 | + | + | + |   |
| Atlg26230 | + | + | + |   |
| Atlg26260 | + | + | + |   |
| Atlg26270 | + | + | + |   |
| Atlg26280 | + | + | + |   |
| Atlg26300 | + | + | + |   |
| Atlg26310 | + | + | + |   |
| Atlg26320 | + |   |   | + |
| Atlg26340 | + | + | + |   |
| Atlg26370 | + | + | + |   |
| Atlg26440 | + | + | + |   |
| Atlg26450 | + | + | + |   |
| Atlg26460 | + | + | + |   |
| Atlg26470 | + | + | + |   |
| Atlg26480 | + | + |   | + |
| Atlg26520 | + | + | + |   |
| Atlg26530 |   |   | + | + |
| Atlg26540 | + | + | + | + |
| Atlg26550 | + | + | + |   |
| Atlg26560 | + | + | + |   |
| Atlg26570 | + | + | + |   |
| Atlg26580 | + | + | + |   |
| Atlg26590 | + |   |   |   |
| Atlg26600 | + |   |   |   |
| Atlg26610 | + | + | + |   |
| Atlg26620 | + | + | + |   |
| Atlg26630 | + | + | + |   |
| Atlg26640 | + | + | + |   |
| Atlg26650 | + | + | + |   |
| Atlg26660 | + | + | + |   |
| Atlg26665 | + | + | + |   |
| Atlg26670 | + | + | + |   |
| Atlg26690 | + | + | + |   |
| Atlg26700 | + | + | + |   |
| Atlg26710 | + |   |   |   |
| Atlg26730 | + | + | + |   |
| Atlg26740 | + | + | + |   |
| Atlg26750 | + | + | + |   |
| Atlg26760 | + | + | + |   |
| Atlg26770 | + | + | + |   |
| Atlg26780 | + |   |   | + |
| Atlg26795 | + | + |   |   |
| Atlg26800 | + | + |   |   |



|           |   |   |   |   |
|-----------|---|---|---|---|
| Atlg26820 | + | + | + |   |
| Atlg26830 | + | + | + |   |
| Atlg26840 | + | + | + |   |
| Atlg26850 | + | + | + |   |
| Atlg26880 | + | + | + |   |
| Atlg26910 | + | + | + |   |
| Atlg26920 | + | + | + |   |
| Atlg26930 | + | + | + |   |
| Atlg26940 | + | + | + |   |
| Atlg26960 | + | + | + |   |
| Atlg27000 | + | + | + |   |
| Atlg27030 |   | + | + |   |
| Atlg27040 | + | + | + | + |
| Atlg27050 | + | + | + |   |
| Atlg27070 | + | + | + |   |
| Atlg27080 | + | + | + |   |
| Atlg27090 | + | + | + |   |
| Atlg27100 | + | + | + |   |
| Atlg27120 | + | + | + |   |
| Atlg27130 | + | + | + |   |
| Atlg27150 | + | + | + |   |
| Atlg27190 | + | + | + |   |
| Atlg27200 | + | + | + |   |
| Atlg27210 | + | + | + |   |
| Atlg27290 | + | + | + |   |
| Atlg27300 | + | + | + |   |
| Atlg27310 | + | + | + |   |
| Atlg27320 | + | + | + |   |
| Atlg27330 | + | + | + |   |
| Atlg27340 | + | + | + |   |
| Atlg27360 | + | + | + | + |
| Atlg27370 | + | + | + |   |
| Atlg27385 | + | + | + |   |
| Atlg27390 | + | + | + |   |
| Atlg27400 | + | + | + |   |
| Atlg27410 | + | + | + |   |
| Atlg27435 | + | + | + |   |
| Atlg27440 | + |   | + |   |
| Atlg27450 | + | + | + |   |
| Atlg27460 |   |   | + |   |
| Atlg27480 | + | + | + |   |
| Atlg27510 | + | + | + |   |
| Atlg27520 | + | + | + |   |
| Atlg27530 | + | + | + |   |
| Atlg27580 | + | + | + |   |
| Atlg27595 | + | + | + |   |
| Atlg27600 | + | + | + |   |
| Atlg27610 | + |   |   |   |
| Atlg27630 | + | + | + |   |
| Atlg27650 | + | + | + |   |
| Atlg27680 | + | + | + |   |
| Atlg27690 | + | + | + |   |

|           |   |   |   |   |
|-----------|---|---|---|---|
| Atlg27700 | + | + | + |   |
| Atlg27730 | + |   |   |   |
| Atlg27760 | + | + | + |   |
| Atlg27770 | + | + | + |   |
| Atlg27840 | + | + | + |   |
| Atlg27840 | + | + | + |   |
| Atlg27850 | + | + | + |   |
| Atlg27880 | + | + | + |   |
| Atlg27900 | + | + | + |   |
| Atlg27910 | + |   | + |   |
| Atlg27920 | + | + | + |   |
| Atlg27930 | + | + | + |   |
| Atlg27940 | + |   | + | + |
| Atlg27950 | + | + | + |   |
| Atlg27960 | + | + | + |   |
| Atlg27970 | + | + | + |   |
| Atlg27980 | + | + | + |   |
| Atlg28030 |   |   | + |   |
| Atlg28060 | + | + | + |   |
| Atlg28070 | + | + | + |   |
| Atlg28090 | + | + | + |   |
| Atlg28100 | + | + | + |   |
| Atlg28110 | + | + | + |   |
| Atlg28120 | + | + | + |   |
| Atlg28130 | + | + | + |   |
| Atlg28140 | + | + | + |   |
| Atlg28150 | + | + | + |   |
| Atlg28200 | + | + | + |   |
| Atlg28210 | + | + | + |   |
| Atlg28220 | + | + | + |   |
| Atlg28230 | + | + | + |   |
| Atlg28240 | + | + | + |   |
| Atlg28250 | + | + | + |   |
| Atlg28260 | + | + | + |   |
| Atlg28270 | + | + | + | + |
| Atlg28280 | + | + | + |   |
| Atlg28290 | + | + | + |   |
| Atlg28320 | + | + | + |   |
| Atlg28340 | + | + | + |   |
| Atlg28370 |   |   | + |   |
| Atlg28375 | + |   |   | + |
| Atlg28380 | + | + | + |   |
| Atlg28390 | + | + | + |   |
| Atlg28395 | + | + | + |   |
| Atlg28400 | + | + | + |   |
| Atlg28410 | + | + | + |   |
| Atlg28420 | + | + | + |   |
| Atlg28430 | + |   |   | + |
| Atlg28440 | + | + | + |   |
| Atlg28470 | + |   | + |   |
| Atlg28480 | + | + |   |   |
| Atlg28490 | + | + | + |   |

|           |   |   |   |   |
|-----------|---|---|---|---|
| Atlg28500 | + |   |   | + |
| Atlg28510 | + | + | + |   |
| Atlg28520 | + | + | + |   |
| Atlg28530 | + | + | + |   |
| Atlg28540 | + | + | + |   |
| Atlg28550 | + |   |   | + |
| Atlg28560 | + | + | + |   |
| Atlg28570 | + | + | + |   |
| Atlg28580 | + | + | + |   |
| Atlg28600 | + | + | + |   |
| Atlg28610 | + | + | + |   |
| Atlg28680 | + | + | + |   |
| Atlg28710 | + | + | + |   |
| Atlg28760 | + | + | + |   |
| Atlg28960 | + | + | + |   |
| Atlg29040 | + | + | + |   |
| Atlg29050 | + | + | + |   |
| Atlg29060 | + | + | + |   |
| Atlg29070 | + | + | + |   |
| Atlg29080 |   |   | + | + |
| Atlg29130 | + | + | + |   |
| Atlg29140 | + | + | + | + |
| Atlg29150 | + | + | + |   |
| Atlg29160 | + | + | + |   |
| Atlg29180 |   |   | + |   |
| Atlg29195 | + | + | + |   |
| Atlg29200 | + |   |   | + |
| Atlg29220 | + | + | + |   |
| Atlg29230 | + | + | + |   |
| Atlg29240 | + | + | + |   |
| Atlg29250 | + | + | + |   |
| Atlg29260 | + | + | + |   |
| Atlg29310 | + | + | + |   |
| Atlg29330 | + | + | + |   |
| Atlg29340 | + | + | + |   |
| Atlg29350 | + | + | + |   |
| Atlg29390 | + | + | + |   |
| Atlg29395 | + | + | + |   |
| Atlg29400 | + | + | + |   |
| Atlg29410 | + | + | + |   |
| Atlg29430 | + | + | + |   |
| Atlg29440 |   | + | + |   |
| Atlg29460 | + | + | + |   |
| Atlg29470 | + | + | + |   |
| Atlg29490 |   | + |   |   |
| Atlg29500 | + | + | + |   |
| Atlg29510 | + | + | + |   |
| Atlg29520 | + | + | + |   |
| Atlg29530 | + | + | + |   |
| Atlg29550 | + | + | + |   |
| Atlg29660 | + | + | + |   |
| Atlg29670 | + | + | + |   |

|           |   |   |   |   |
|-----------|---|---|---|---|
| Atlg29690 | + | + | + |   |
| Atlg29700 | + | + | + |   |
| Atlg29710 | + | + | + |   |
| Atlg29750 | + | + | + |   |
| Atlg29760 | + | + | + |   |
| Atlg29790 | + | + | + |   |
| Atlg29820 | + | + | + |   |
| Atlg29850 | + | + | + |   |
| Atlg29880 | + | + | + |   |
| Atlg29900 | + | + | + |   |
| Atlg29910 | + | + | + |   |
| Atlg29940 | + | + | + |   |
| Atlg29950 | + | + | + |   |
| Atlg29960 |   |   | + |   |
| Atlg29970 | + | + | + |   |
| Atlg29980 | + | + | + |   |
| Atlg29990 | + | + | + |   |
| Atlg30000 | + | + | + |   |
| Atlg30010 | + |   | + |   |
| Atlg30020 | + |   |   |   |
| Atlg30040 | + | + | + | + |
| Atlg30070 | + | + | + |   |
| Atlg30080 | + |   |   |   |
| Atlg30090 | + | + | + |   |
| Atlg30110 | + | + | + |   |
| Atlg30120 | + | + | + |   |
| Atlg30130 | + | + | + |   |
| Atlg30135 | + |   |   |   |
| Atlg30200 | + | + | + |   |
| Atlg30210 | + | + | + |   |
| Atlg30220 | + | + | + |   |
| Atlg30240 | + | + | + |   |
| Atlg30270 | + | + | + |   |
| Atlg30290 | + | + | + |   |
| Atlg30300 | + | + | + |   |
| Atlg30330 | + | + | + |   |
| Atlg30350 | + |   |   | + |
| Atlg30360 | + | + | + |   |
| Atlg30380 | + | + | + |   |
| Atlg30400 | + | + | + |   |
| Atlg30410 | + | + | + |   |
| Atlg30440 | + | + | + |   |
| Atlg30480 | + | + | + |   |
| Atlg30490 | + | + | + |   |
| Atlg30510 | + | + | + |   |
| Atlg30515 | + |   |   |   |
| Atlg30520 | + | + | + |   |
| Atlg30530 | + | + | + |   |
| Atlg30540 | + | + |   |   |
| Atlg30550 | + | + | + |   |
| Atlg30570 | + |   |   |   |
| Atlg30580 | + | + | + |   |

|           |   |   |   |   |
|-----------|---|---|---|---|
| Atlg30600 | + | + | + |   |
| Atlg30610 | + | + | + |   |
| Atlg30620 | + | + | + |   |
| Atlg30630 | + | + | + |   |
| Atlg30640 | + | + | + |   |
| Atlg30660 | + | + |   |   |
| Atlg30690 | + | + | + |   |
| Atlg30710 |   | + |   | + |
| Atlg30760 |   |   | + |   |
| Atlg30780 |   |   | + |   |
| Atlg30795 | + | + | + | + |
| Atlg30810 | + | + |   |   |
| Atlg30820 | + | + | + |   |
| Atlg30825 | + | + | + |   |
| Atlg30840 | + | + | + |   |
| Atlg30880 | + | + | + |   |
| Atlg30890 | + | + | + |   |
| Atlg30900 | + | + | + |   |
| Atlg30910 | + | + | + |   |
| Atlg30940 | + | + | + |   |
| Atlg30960 | + | + | + |   |
| Atlg30970 | + | + | + |   |
| Atlg31010 | + | + | + |   |
| Atlg31020 | + | + | + |   |
| Atlg31040 | + | + |   | + |
| Atlg31070 | + | + | + |   |
| Atlg31130 | + | + | + |   |
| Atlg31150 | + |   | + |   |
| Atlg31160 | + | + | + |   |
| Atlg31170 | + | + | + |   |
| Atlg31180 | + | + | + |   |
| Atlg31190 | + | + | + |   |
| Atlg31220 |   | + |   |   |
| Atlg31230 | + | + | + |   |
| Atlg31240 | + |   |   |   |
| Atlg31280 | + | + | + |   |
| Atlg31290 |   | + | + |   |
| Atlg31300 | + | + | + |   |
| Atlg31310 | + | + | + |   |
| Atlg31320 | + |   |   |   |
| Atlg31330 | + | + | + |   |
| Atlg31335 | + |   | + |   |
| Atlg31340 | + | + | + |   |
| Atlg31350 | + | + | + |   |
| Atlg31360 | + | + | + |   |
| Atlg31410 |   |   | + |   |
| Atlg31420 | + | + | + |   |
| Atlg31470 | + | + | + |   |
| Atlg31480 | + | + | + |   |
| Atlg31490 |   | + | + | + |
| Atlg31500 | + | + | + |   |
| Atlg31550 | + | + | + |   |

|           |   |   |   |   |
|-----------|---|---|---|---|
| Atlg31580 |   | + |   |   |
| Atlg31600 | + | + | + |   |
| Atlg31650 | + | + | + |   |
| Atlg31660 | + | + | + |   |
| Atlg31730 | + | + | + |   |
| Atlg31750 | + | + |   |   |
| Atlg31760 | + |   |   | + |
| Atlg31770 | + | + | + |   |
| Atlg31780 | + | + | + |   |
| Atlg31800 | + | + | + |   |
| Atlg31810 | + | + | + |   |
| Atlg31812 | + | + | + |   |
| Atlg31814 | + | + | + |   |
| Atlg31817 | + | + | + |   |
| Atlg31820 | + |   |   |   |
| Atlg31830 | + | + | + |   |
| Atlg31840 |   | + | + |   |
| Atlg31850 | + | + | + |   |
| Atlg31860 | + | + | + |   |
| Atlg31870 | + | + | + |   |
| Atlg31910 | + | + | + |   |
| Atlg31920 | + |   | + |   |
| Atlg31930 | + | + | + |   |
| Atlg31940 | + | + | + |   |
| Atlg31950 |   |   | + |   |
| Atlg31970 | + | + | + |   |
| Atlg32050 | + | + | + |   |
| Atlg32060 | + | + | + |   |
| Atlg32070 | + | + | + |   |
| Atlg32080 | + | + | + |   |
| Atlg32090 | + | + | + |   |
| Atlg32100 | + | + | + |   |
| Atlg32120 | + | + |   |   |
| Atlg32130 | + | + | + |   |
| Atlg32150 | + | + | + |   |
| Atlg32160 | + | + | + |   |
| Atlg32170 | + | + | + |   |
| Atlg32190 | + | + | + |   |
| Atlg32200 | + | + | + |   |
| Atlg32210 | + | + | + |   |
| Atlg32220 | + | + | + |   |
| Atlg32230 | + | + | + |   |
| Atlg32240 | + | + | + |   |
| Atlg32250 | + |   |   | + |
| Atlg32260 | + |   | + |   |
| Atlg32310 | + | + | + |   |
| Atlg32330 | + | + | + |   |
| Atlg32340 | + | + | + |   |
| Atlg32360 | + | + | + |   |
| Atlg32370 | + | + | + |   |
| Atlg32375 | + |   |   |   |
| Atlg32400 | + | + | + |   |

|           |   |   |   |   |
|-----------|---|---|---|---|
| Atlg32410 | + | + | + |   |
| Atlg32430 | + | + |   |   |
| Atlg32440 | + | + | + |   |
| Atlg32450 | + | + | + |   |
| Atlg32460 | + | + | + |   |
| Atlg32470 | + | + | + |   |
| Atlg32490 | + | + | + |   |
| Atlg32500 | + | + | + |   |
| Atlg32520 | + | + | + |   |
| Atlg32530 | + | + | + |   |
| Atlg32540 | + | + | + |   |
| Atlg32550 | + | + | + |   |
| Atlg32580 | + | + | + |   |
| Atlg32610 | + |   | + |   |
| Atlg32630 | + | + |   |   |
| Atlg32640 | + | + | + |   |
| Atlg32690 | + | + |   |   |
| Atlg32700 | + | + | + |   |
| Atlg32730 | + |   | + |   |
| Atlg32740 | + | + |   |   |
| Atlg32750 | + | + | + |   |
| Atlg32760 | + | + | + | + |
| Atlg32780 | + | + |   |   |
| Atlg32790 | + | + | + |   |
| Atlg32810 | + | + | + |   |
| Atlg32860 |   |   | + |   |
| Atlg32870 | + | + | + |   |
| Atlg32900 | + | + | + |   |
| Atlg32920 | + | + | + |   |
| Atlg32930 | + | + | + |   |
| Atlg32940 |   | + |   |   |
| Atlg32990 | + | + | + |   |
| Atlg33040 | + | + | + |   |
| Atlg33050 | + | + | + |   |
| Atlg33110 | + | + | + |   |
| Atlg33120 | + | + | + |   |
| Atlg33170 | + | + | + |   |
| Atlg33230 | + | + | + |   |
| Atlg33240 | + | + | + |   |
| Atlg33250 | + | + | + |   |
| Atlg33265 | + | + | + |   |
| Atlg33270 | + | + | + |   |
| Atlg33290 | + | + | + |   |
| Atlg33330 | + | + | + |   |
| Atlg33360 | + | + |   |   |
| Atlg33390 | + | + | + |   |
| Atlg33400 | + | + | + |   |
| Atlg33410 | + | + | + |   |
| Atlg33420 | + | + | + |   |
| Atlg33430 | + |   |   |   |
| Atlg33440 | + |   |   |   |
| Atlg33470 | + | + | + |   |

|           |   |   |   |
|-----------|---|---|---|
| Atlg33480 | + |   |   |
| Atlg33490 | + | + | + |
| Atlg33560 | + | + | + |
| Atlg33590 | + | + | + |
| Atlg33600 | + | + | + |
| Atlg33660 | + |   |   |
| Atlg33680 | + |   | + |
| Atlg33690 | + | + | + |
| Atlg33700 | + |   |   |
| Atlg33720 | + |   |   |
| Atlg33770 | + | + |   |
| Atlg33780 | + | + | + |
| Atlg33800 | + | + | + |
| Atlg33810 | + | + | + |
| Atlg33811 | + | + | + |
| Atlg33940 | + | + | + |
| Atlg33960 |   | + | + |
| Atlg33970 | + | + | + |
| Atlg33980 | + | + | + |
| Atlg33990 | + | + | + |
| Atlg34000 | + | + | + |
| Atlg34010 | + | + | + |
| Atlg34020 | + | + | + |
| Atlg34030 | + | + | + |
| Atlg34040 | + | + | + |
| Atlg34065 | + | + | + |
| Atlg34100 | + | + | + |
| Atlg34110 | + | + | + |
| Atlg34120 | + | + |   |
| Atlg34130 | + | + | + |
| Atlg34150 | + | + | + |
| Atlg34190 | + | + | + |
| Atlg34200 | + | + | + |
| Atlg34210 | + | + | + |
| Atlg34220 | + | + | + |
| Atlg34245 | + | + |   |
| Atlg34260 | + | + | + |
| Atlg34270 | + | + | + |
| Atlg34280 | + |   |   |
| Atlg34300 | + | + | + |
| Atlg34310 | + | + | + |
| Atlg34320 | + | + | + |
| Atlg34340 | + | + | + |
| Atlg34350 | + | + | + |
| Atlg34355 | + |   | + |
| Atlg34360 | + | + | + |
| Atlg34370 | + | + | + |
| Atlg34380 | + | + | + |
| Atlg34430 | + | + | + |
| Atlg34440 |   |   | + |
| Atlg34460 | + | + | + |
| Atlg34470 | + | + | + |



|           |   |   |   |   |
|-----------|---|---|---|---|
| Atlg34550 | + | + | + |   |
| Atlg34570 | + | + | + |   |
| Atlg34575 |   |   | + | + |
| Atlg34580 | + | + | + |   |
| Atlg34630 | + | + | + |   |
| Atlg34640 | + | + | + |   |
| Atlg34750 | + | + | + |   |
| Atlg34770 | + | + | + |   |
| Atlg34780 | + | + | + |   |
| Atlg35140 | + | + | + |   |
| Atlg35180 | + | + | + |   |
| Atlg35190 | + | + | + |   |
| Atlg35220 | + | + | + |   |
| Atlg35290 | + | + | + |   |
| Atlg35310 | + | + | + |   |
| Atlg35340 | + | + | + |   |
| Atlg35350 |   | + |   |   |
| Atlg35420 | + | + | + |   |
| Atlg35430 | + | + | + |   |
| Atlg35460 | + | + | + |   |
| Atlg35470 | + | + | + |   |
| Atlg35490 | + | + | + | + |
| Atlg35510 | + | + | + |   |
| Atlg35530 | + | + | + |   |
| Atlg35550 | + | + | + |   |
| Atlg35580 | + | + | + |   |
| Atlg35620 | + | + | + |   |
| Atlg35660 | + | + | + |   |
| Atlg35670 | + | + | + |   |
| Atlg35680 | + | + | + |   |
| Atlg35710 | + | + |   |   |
| Atlg35720 | + | + | + |   |
| Atlg35730 | + |   |   |   |
| Atlg35780 | + | + | + |   |
| Atlg35910 |   | + | + |   |
| Atlg36050 | + | + | + |   |
| Atlg36070 | + | + | + |   |
| Atlg36150 | + |   |   | + |
| Atlg36160 | + | + | + |   |
| Atlg36180 | + |   | + |   |
| Atlg36240 | + |   |   |   |
| Atlg36310 | + | + | + |   |
| Atlg36320 | + | + | + |   |
| Atlg36340 |   | + |   | + |
| Atlg36370 | + | + | + |   |
| Atlg36380 | + | + | + |   |
| Atlg36390 | + | + | + |   |
| Atlg36620 |   |   | + |   |
| Atlg36730 | + | + | + |   |
| Atlg36980 | + | + | + |   |
| Atlg36990 | + | + | + |   |
| Atlg37130 | + | + | + |   |

|           |   |   |   |   |
|-----------|---|---|---|---|
| Atlg38131 | + | + | + |   |
| Atlg40088 |   | + | + |   |
| Atlg40871 | + |   |   |   |
| Atlg41830 | + | + | + |   |
| Atlg41880 | + | + | + |   |
| Atlg42360 |   |   | + |   |
| Atlg42440 | + | + | + |   |
| Atlg42470 | + | + | + |   |
| Atlg42480 | + | + | + |   |
| Atlg42540 | + | + | + |   |
| Atlg42550 | + | + | + |   |
| Atlg42560 | + |   |   | + |
| Atlg42960 | + | + | + |   |
| Atlg42970 | + | + | + |   |
| Atlg42990 | + | + | + |   |
| Atlg43130 | + | + | + |   |
| Atlg43170 | + | + | + |   |
| Atlg43190 | + | + | + |   |
| Atlg43560 | + | + | + |   |
| Atlg43580 | + | + | + |   |
| Atlg43620 | + | + | + |   |
| Atlg43630 | + | + | + |   |
| Atlg43640 |   |   | + | + |
| Atlg43650 | + |   | + |   |
| Atlg43670 | + | + | + |   |
| Atlg43680 |   |   | + |   |
| Atlg43690 | + | + | + |   |
| Atlg43700 | + | + | + |   |
| Atlg43710 | + | + | + |   |
| Atlg43790 | + | + | + |   |
| Atlg43850 | + | + | + |   |
| Atlg43860 | + | + | + |   |
| Atlg43890 | + | + | + |   |
| Atlg43900 | + | + | + |   |
| Atlg43910 | + | + | + |   |
| Atlg44000 | + | + | + |   |
| Atlg44100 | + | + | + |   |
| Atlg44110 | + | + | + |   |
| Atlg44120 | + | + |   | + |
| Atlg44130 |   |   | + | + |
| Atlg44160 | + | + |   |   |
| Atlg44170 | + | + | + |   |
| Atlg44180 | + | + | + |   |
| Atlg44254 | + |   |   | + |
| Atlg44350 | + | + | + |   |
| Atlg44446 | + | + | + |   |
| Atlg44575 | + | + | + |   |
| Atlg44750 | + | + | + |   |
| Atlg44760 | + | + | + |   |
| Atlg44770 | + | + | + |   |
| Atlg44780 | + | + | + |   |
| Atlg44790 | + | + | + |   |

|           |   |   |   |   |
|-----------|---|---|---|---|
| Atlg44800 | + | + | + |   |
| Atlg44810 | + | + | + |   |
| Atlg44830 |   | + | + |   |
| Atlg44835 | + | + | + |   |
| Atlg44900 | + | + | + |   |
| Atlg44910 | + | + | + |   |
| Atlg44920 | + | + | + |   |
| Atlg44960 | + | + | + |   |
| Atlg44970 | + | + | + |   |
| Atlg45000 | + | + | + |   |
| Atlg45050 | + | + | + |   |
| Atlg45110 | + | + | + |   |
| Atlg45130 | + | + | + |   |
| Atlg45145 | + | + | + |   |
| Atlg45150 | + | + |   |   |
| Atlg45160 | + | + | + |   |
| Atlg45170 | + | + | + |   |
| Atlg45180 | + | + | + |   |
| Atlg45190 |   | + |   | + |
| Atlg45261 | + | + | + |   |
| Atlg45474 | + | + | + |   |
| Atlg45688 | + | + | + |   |
| Atlg45976 | + | + | + |   |
| Atlg46264 | + | + | + |   |
| Atlg47128 | + | + | + |   |
| Atlg47200 | + | + | + |   |
| Atlg47210 | + | + | + |   |
| Atlg47230 | + | + | + |   |
| Atlg47240 | + | + | + |   |
| Atlg47250 | + |   | + |   |
| Atlg47260 | + | + | + |   |
| Atlg47270 | + | + | + |   |
| Atlg47280 | + | + |   | + |
| Atlg47290 | + | + | + |   |
| Atlg47310 | + | + | + |   |
| Atlg47330 | + | + | + |   |
| Atlg47340 | + | + | + |   |
| Atlg47380 | + | + | + |   |
| Atlg47410 | + | + | + |   |
| Atlg47420 | + | + | + |   |
| Atlg47470 |   | + |   | + |
| Atlg47485 |   |   | + | + |
| Atlg47500 | + | + | + |   |
| Atlg47530 | + | + | + |   |
| Atlg47550 | + | + | + |   |
| Atlg47570 | + | + | + |   |
| Atlg47610 | + | + | + |   |
| Atlg47630 | + | + | + |   |
| Atlg47670 | + | + | + |   |
| Atlg47710 | + | + | + |   |
| Atlg47740 | + | + | + |   |
| Atlg47750 | + | + | + |   |

|           |   |   |   |   |
|-----------|---|---|---|---|
| Atlg47770 | + |   |   |   |
| Atlg47820 | + | + | + |   |
| Atlg47830 | + | + | + |   |
| Atlg47870 | + | + | + |   |
| Atlg47900 | + | + | + |   |
| Atlg47960 | + | + | + |   |
| Atlg47970 | + | + | + |   |
| Atlg47980 | + |   |   | + |
| Atlg48000 |   | + |   |   |
| Atlg48030 | + | + | + |   |
| Atlg48040 | + | + | + |   |
| Atlg48050 | + | + | + |   |
| Atlg48090 | + | + | + |   |
| Atlg48100 | + | + | + |   |
| Atlg48110 | + | + | + |   |
| Atlg48120 | + | + | + |   |
| Atlg48140 | + | + | + |   |
| Atlg48160 | + | + | + |   |
| Atlg48170 | + | + | + |   |
| Atlg48180 | + |   |   | + |
| Atlg48200 | + | + | + |   |
| Atlg48210 | + | + | + |   |
| Atlg48230 | + | + | + |   |
| Atlg48240 | + | + | + |   |
| Atlg48260 |   | + |   |   |
| Atlg48270 | + | + | + |   |
| Atlg48280 | + | + | + |   |
| Atlg48300 | + | + | + |   |
| Atlg48310 | + | + | + |   |
| Atlg48320 | + | + | + |   |
| Atlg48330 | + | + |   |   |
| Atlg48350 | + | + | + |   |
| Atlg48360 | + | + | + |   |
| Atlg48370 | + | + | + |   |
| Atlg48380 | + |   | + |   |
| Atlg48410 | + | + | + |   |
| Atlg48420 | + | + | + |   |
| Atlg48430 | + | + | + |   |
| Atlg48440 | + | + | + |   |
| Atlg48450 | + | + | + |   |
| Atlg48460 | + | + | + |   |
| Atlg48470 | + | + |   | + |
| Atlg48480 | + | + | + |   |
| Atlg48520 | + | + | + |   |
| Atlg48550 | + | + | + |   |
| Atlg48560 | + | + | + |   |
| Atlg48570 | + | + | + |   |
| Atlg48580 | + |   |   |   |
| Atlg48600 | + | + | + |   |
| Atlg48610 | + | + | + | + |
| Atlg48620 | + | + | + |   |
| Atlg48630 | + | + | + |   |

|           |   |   |   |   |
|-----------|---|---|---|---|
| Atlg48650 | + | + | + |   |
| Atlg48750 | + | + | + |   |
| Atlg48760 | + | + | + |   |
| Atlg48790 | + | + | + |   |
| Atlg48830 | + | + | + |   |
| Atlg48840 | + | + | + |   |
| Atlg48850 | + | + | + |   |
| Atlg48860 | + | + | + |   |
| Atlg48900 | + | + | + |   |
| Atlg48920 | + | + | + |   |
| Atlg48940 | + |   |   | + |
| Atlg48950 | + | + | + |   |
| Atlg48960 | + | + |   |   |
| Atlg48970 | + | + | + |   |
| Atlg49010 | + | + | + |   |
| Atlg49040 | + | + | + |   |
| Atlg49050 | + | + | + |   |
| Atlg49140 | + | + | + |   |
| Atlg49150 | + |   |   |   |
| Atlg49160 | + | + |   |   |
| Atlg49170 | + | + | + |   |
| Atlg49180 | + |   |   |   |
| Atlg49200 |   | + | + |   |
| Atlg49240 | + | + | + |   |
| Atlg49245 | + | + | + |   |
| Atlg49260 | + | + | + |   |
| Atlg49270 |   | + |   | + |
| Atlg49290 | + | + | + | + |
| Atlg49300 | + | + | + |   |
| Atlg49320 |   | + |   |   |
| Atlg49340 | + | + | + |   |
| Atlg49350 | + | + | + |   |
| Atlg49380 | + | + | + |   |
| Atlg49400 | + | + | + |   |
| Atlg49410 | + | + | + |   |
| Atlg49430 | + | + | + |   |
| Atlg49450 | + |   |   |   |
| Atlg49470 | + | + | + |   |
| Atlg49480 | + | + | + |   |
| Atlg49490 | + | + | + | + |
| Atlg49500 | + | + | + |   |
| Atlg49510 | + | + | + |   |
| Atlg49560 | + | + | + |   |
| Atlg49580 | + | + | + |   |
| Atlg49590 | + | + | + |   |
| Atlg49600 | + | + | + |   |
| Atlg49620 | + |   |   | + |
| Atlg49630 |   | + |   |   |
| Atlg49660 | + | + | + |   |
| Atlg49670 | + | + | + |   |
| Atlg49700 | + | + |   |   |
| Atlg49710 | + | + | + |   |

|           |   |   |   |
|-----------|---|---|---|
| Atlg49720 | + | + | + |
| Atlg49730 | + |   | + |
| Atlg49740 | + | + | + |
| Atlg49750 | + | + | + |
| Atlg49760 | + | + | + |
| Atlg49780 | + | + | + |
| Atlg49790 | + |   |   |
| Atlg49800 |   | + | + |
| Atlg49820 | + | + | + |
| Atlg49840 | + | + | + |
| Atlg49850 | + | + | + |
| Atlg49860 |   |   | + |
| Atlg49880 | + |   | + |
| Atlg49890 | + | + | + |
| Atlg49930 | + | + | + |
| Atlg49950 | + |   | + |
| Atlg49970 | + | + | + |
| Atlg49975 | + | + | + |
| Atlg49980 | + | + | + |
| Atlg50000 | + |   |   |
| Atlg50010 | + | + | + |
| Atlg50020 | + | + | + |
| Atlg50030 | + | + | + |
| Atlg50110 | + | + | + |
| Atlg50120 | + | + | + |
| Atlg50140 | + | + | + |
| Atlg50170 | + | + | + |
| Atlg50200 | + | + | + |
| Atlg50230 | + | + | + |
| Atlg50240 | + | + | + |
| Atlg50250 | + | + | + |
| Atlg50260 | + | + | + |
| Atlg50290 | + | + | + |
| Atlg50300 | + | + | + |
| Atlg50310 | + | + | + |
| Atlg50320 | + | + | + |
| Atlg50350 | + |   | + |
| Atlg50360 | + | + | + |
| Atlg50370 | + | + | + |
| Atlg50380 | + | + | + |
| Atlg50390 |   | + |   |
| Atlg50400 | + | + | + |
| Atlg50410 | + | + | + |
| Atlg50420 | + | + | + |
| Atlg50430 | + | + | + |
| Atlg50440 | + | + | + |
| Atlg50450 | + | + | + |
| Atlg50460 | + | + | + |
| Atlg50480 | + | + | + |
| Atlg50490 | + | + | + |
| Atlg50500 | + | + | + |
| Atlg50510 | + | + | + |

|           |   |   |   |   |
|-----------|---|---|---|---|
| Atlg50570 | + | + | + |   |
| Atlg50575 | + | + | + |   |
| Atlg50590 | + | + | + |   |
| Atlg50600 | + | + | + |   |
| Atlg50610 | + | + |   | + |
| Atlg50620 | + | + | + |   |
| Atlg50630 | + | + | + |   |
| Atlg50640 | + | + |   |   |
| Atlg50660 | + | + | + |   |
| Atlg50670 | + | + | + |   |
| Atlg50700 | + |   |   |   |
| Atlg50710 | + | + | + |   |
| Atlg50730 | + | + | + |   |
| Atlg50740 | + | + | + |   |
| Atlg50840 | + | + | + |   |
| Atlg50890 | + | + | + |   |
| Atlg50900 | + | + | + |   |
| Atlg50910 | + |   | + |   |
| Atlg50920 | + | + | + |   |
| Atlg50940 | + | + | + |   |
| Atlg50950 | + | + | + |   |
| Atlg50990 | + | + |   |   |
| Atlg51060 | + | + | + |   |
| Atlg51070 | + | + | + |   |
| Atlg51080 |   |   | + |   |
| Atlg51100 | + | + | + |   |
| Atlg51110 | + | + | + |   |
| Atlg51115 | + | + | + |   |
| Atlg51140 | + | + | + |   |
| Atlg51160 | + | + | + |   |
| Atlg51170 | + | + | + |   |
| Atlg51200 | + | + | + |   |
| Atlg51210 | + |   |   |   |
| Atlg51250 | + | + | + | + |
| Atlg51260 | + | + | + |   |
| Atlg51270 | + | + | + |   |
| Atlg51300 |   | + | + |   |
| Atlg51310 | + | + | + |   |
| Atlg51340 | + | + | + |   |
| Atlg51350 | + | + | + |   |
| Atlg51380 | + | + | + |   |
| Atlg51390 | + | + | + |   |
| Atlg51400 | + | + | + |   |
| Atlg51410 | + |   |   | + |
| Atlg51420 | + |   |   |   |
| Atlg51440 |   | + |   |   |
| Atlg51450 | + | + | + |   |
| Atlg51460 | + | + | + |   |
| Atlg51490 | + | + | + | + |
| Atlg51500 | + | + | + |   |
| Atlg51510 | + | + | + |   |
| Atlg51520 | + |   |   |   |

|           |   |   |   |   |
|-----------|---|---|---|---|
| Atlg51540 | + | + | + |   |
| Atlg51550 | + | + | + |   |
| Atlg51570 | + | + | + |   |
| Atlg51580 | + | + | + |   |
| Atlg51590 | + | + | + |   |
| Atlg51600 | + | + | + |   |
| Atlg51610 | + | + | + |   |
| Atlg51650 | + | + | + |   |
| Atlg51660 | + | + | + |   |
| Atlg51670 | + | + | + | + |
| Atlg51680 | + | + | + |   |
| Atlg51690 | + | + | + |   |
| Atlg51700 | + | + | + |   |
| Atlg51710 | + | + | + |   |
| Atlg51720 | + | + | + |   |
| Atlg51730 | + | + | + |   |
| Atlg51740 | + | + | + |   |
| Atlg51745 | + | + | + |   |
| Atlg51780 | + | + | + |   |
| Atlg51800 |   | + |   |   |
| Atlg51805 | + | + | + |   |
| Atlg51850 |   | + |   |   |
| Atlg51915 | + |   |   | + |
| Atlg51940 | + | + | + |   |
| Atlg51950 | + | + | + |   |
| Atlg51980 | + | + | + |   |
| Atlg52000 | + | + |   |   |
| Atlg52040 | + | + | + |   |
| Atlg52080 | + | + | + |   |
| Atlg52140 | + | + | + |   |
| Atlg52150 | + | + | + |   |
| Atlg52160 | + | + | + |   |
| Atlg52180 |   | + | + |   |
| Atlg52190 | + | + | + |   |
| Atlg52220 | + | + | + |   |
| Atlg52230 | + | + | + |   |
| Atlg52240 | + | + |   |   |
| Atlg52250 |   | + | + |   |
| Atlg52280 | + | + | + |   |
| Atlg52290 | + | + | + |   |
| Atlg52300 | + | + | + |   |
| Atlg52310 | + | + | + |   |
| Atlg52320 | + | + | + |   |
| Atlg52340 | + | + | + |   |
| Atlg52360 | + | + | + |   |
| Atlg52380 | + | + | + |   |
| Atlg52400 | + | + | + |   |
| Atlg52410 | + | + | + |   |
| Atlg52420 | + | + | + |   |
| Atlg52470 |   |   | + |   |
| Atlg52510 | + | + | + |   |
| Atlg52510 | + | + | + |   |



|           |   |   |   |   |
|-----------|---|---|---|---|
| Atlg52520 | + | + | + |   |
| Atlg52530 | + | + | + |   |
| Atlg52540 | + | + | + |   |
| Atlg52550 | + | + | + |   |
| Atlg52570 | + | + | + |   |
| Atlg52580 | + | + | + | + |
| Atlg52590 | + | + | + |   |
| Atlg52600 | + | + | + |   |
| Atlg52620 | + | + | + |   |
| Atlg52630 | + | + | + |   |
| Atlg52640 | + | + | + |   |
| Atlg52670 | + | + | + |   |
| Atlg52680 | + | + | + | + |
| Atlg52690 | + | + | + |   |
| Atlg52720 | + | + | + |   |
| Atlg52730 | + | + | + |   |
| Atlg52740 | + | + | + |   |
| Atlg52760 | + | + | + |   |
| Atlg52810 | + |   | + |   |
| Atlg52830 |   | + | + |   |
| Atlg52870 | + | + | + |   |
| Atlg52880 | + | + | + |   |
| Atlg52890 | + | + | + |   |
| Atlg52910 | + | + | + |   |
| Atlg52920 | + | + |   |   |
| Atlg52930 | + | + | + |   |
| Atlg52970 |   | + |   | + |
| Atlg52980 | + | + | + |   |
| Atlg52990 | + | + | + |   |
| Atlg53000 | + | + | + |   |
| Atlg53020 | + |   |   |   |
| Atlg53030 | + | + | + |   |
| Atlg53035 | + | + | + |   |
| Atlg53050 | + | + | + |   |
| Atlg53060 | + |   |   |   |
| Atlg53070 | + | + | + |   |
| Atlg53090 | + | + | + |   |
| Atlg53110 | + | + | + |   |
| Atlg53120 | + | + | + |   |
| Atlg53140 | + | + | + |   |
| Atlg53160 | + | + | + |   |
| Atlg53165 | + | + | + |   |
| Atlg53170 | + | + | + |   |
| Atlg53180 | + |   |   |   |
| Atlg53200 | + | + | + |   |
| Atlg53210 | + | + | + |   |
| Atlg53230 | + | + | + |   |
| Atlg53240 | + | + | + |   |
| Atlg53280 | + | + | + |   |
| Atlg53290 | + | + | + |   |
| Atlg53300 | + | + | + |   |
| Atlg53310 | + | + | + |   |

|           |   |   |   |   |
|-----------|---|---|---|---|
| Atlg53320 | + | + | + |   |
| Atlg53360 | + | + | + |   |
| Atlg53380 | + | + | + |   |
| Atlg53390 | + | + | + |   |
| Atlg53400 | + | + | + |   |
| Atlg53430 | + | + | + |   |
| Atlg53440 | + | + | + |   |
| Atlg53450 | + |   |   |   |
| Atlg53460 | + | + | + |   |
| Atlg53490 | + |   |   |   |
| Atlg53500 | + | + | + |   |
| Atlg53510 | + | + | + |   |
| Atlg53520 | + | + | + |   |
| Atlg53530 | + | + | + |   |
| Atlg53560 | + | + | + |   |
| Atlg53570 | + | + | + |   |
| Atlg53580 | + | + | + |   |
| Atlg53590 | + | + | + |   |
| Atlg53640 |   | + | + |   |
| Atlg53645 | + | + | + |   |
| Atlg53650 | + |   | + |   |
| Atlg53670 | + | + | + |   |
| Atlg53700 |   | + |   |   |
| Atlg53710 | + | + | + |   |
| Atlg53720 | + | + | + |   |
| Atlg53730 | + | + | + |   |
| Atlg53750 | + | + | + |   |
| Atlg53760 | + | + | + |   |
| Atlg53770 | + | + | + |   |
| Atlg53790 | + | + |   |   |
| Atlg53800 | + | + | + |   |
| Atlg53830 |   | + |   |   |
| Atlg53840 | + | + | + |   |
| Atlg53850 | + | + | + |   |
| Atlg53870 | + | + |   |   |
| Atlg53880 | + | + | + |   |
| Atlg53885 | + | + |   |   |
| Atlg53910 | + | + | + |   |
| Atlg53920 | + | + | + |   |
| Atlg54010 | + | + | + |   |
| Atlg54020 |   |   | + | + |
| Atlg54030 | + | + | + |   |
| Atlg54040 | + | + | + |   |
| Atlg54050 | + |   | + |   |
| Atlg54060 | + | + | + |   |
| Atlg54070 | + | + | + | + |
| Atlg54080 | + | + | + |   |
| Atlg54090 | + | + | + |   |
| Atlg54100 | + | + | + |   |
| Atlg54110 | + | + | + |   |
| Atlg54115 | + | + | + |   |
| Atlg54120 | + |   | + |   |

|           |   |   |   |   |
|-----------|---|---|---|---|
| Atlg54130 | + | + | + |   |
| Atlg54140 | + | + | + |   |
| Atlg54150 | + | + | + |   |
| Atlg54170 | + | + | + |   |
| Atlg54180 | + | + | + |   |
| Atlg54200 | + | + | + |   |
| Atlg54210 | + | + | + |   |
| Atlg54220 | + | + | + |   |
| Atlg54250 | + | + | + |   |
| Atlg54260 | + | + | + |   |
| Atlg54270 | + | + | + |   |
| Atlg54280 | + | + |   | + |
| Atlg54290 | + | + | + |   |
| Atlg54310 | + | + | + |   |
| Atlg54320 | + | + | + |   |
| Atlg54340 | + | + | + |   |
| Atlg54350 | + | + | + |   |
| Atlg54360 | + | + | + |   |
| Atlg54370 | + | + | + |   |
| Atlg54380 | + | + | + |   |
| Atlg54390 | + | + | + |   |
| Atlg54410 | + | + | + |   |
| Atlg54440 | + | + | + |   |
| Atlg54450 | + |   |   |   |
| Atlg54460 | + | + | + |   |
| Atlg54490 | + | + | + |   |
| Atlg54500 | + | + | + |   |
| Atlg54510 | + | + | + |   |
| Atlg54520 | + | + | + |   |
| Atlg54560 | + |   |   |   |
| Atlg54570 | + | + | + |   |
| Atlg54610 | + | + | + |   |
| Atlg54630 | + | + | + |   |
| Atlg54650 | + |   | + |   |
| Atlg54680 | + | + | + |   |
| Atlg54690 | + | + | + |   |
| Atlg54710 | + | + | + |   |
| Atlg54730 | + | + | + |   |
| Atlg54740 | + | + | + |   |
| Atlg54770 | + | + | + |   |
| Atlg54780 | + | + | + |   |
| Atlg54790 | + | + | + |   |
| Atlg54820 | + | + | + |   |
| Atlg54830 | + | + | + |   |
| Atlg54840 | + |   |   | + |
| Atlg54850 | + | + | + |   |
| Atlg54860 | + |   |   | + |
| Atlg54870 | + |   |   | + |
| Atlg54890 |   | + |   |   |
| Atlg54920 | + | + | + |   |
| Atlg54940 | + |   |   |   |
| Atlg54960 | + | + | + |   |

|           |   |   |   |   |
|-----------|---|---|---|---|
| Atlg54990 | + | + | + |   |
| Atlg55000 | + | + | + |   |
| Atlg55020 | + | + | + |   |
| Atlg55030 | + |   |   |   |
| Atlg55080 | + | + | + |   |
| Atlg55090 | + | + | + |   |
| Atlg55110 | + | + | + |   |
| Atlg55120 | + | + | + |   |
| Atlg55130 | + | + | + |   |
| Atlg55150 | + | + | + |   |
| Atlg55160 | + | + | + |   |
| Atlg55170 | + | + | + |   |
| Atlg55190 | + | + | + |   |
| Atlg55200 | + | + | + | + |
| Atlg55210 | + | + | + |   |
| Atlg55250 | + | + |   |   |
| Atlg55255 | + |   |   | + |
| Atlg55260 | + | + | + |   |
| Atlg55265 | + | + | + |   |
| Atlg55270 | + | + | + |   |
| Atlg55280 | + | + | + |   |
| Atlg55300 | + | + | + |   |
| Atlg55310 | + | + | + |   |
| Atlg55320 | + | + | + |   |
| Atlg55330 | + | + | + |   |
| Atlg55350 | + | + | + |   |
| Atlg55360 | + | + | + |   |
| Atlg55370 | + | + | + |   |
| Atlg55460 | + | + | + |   |
| Atlg55480 | + | + | + |   |
| Atlg55490 | + | + | + |   |
| Atlg55500 | + | + | + |   |
| Atlg55510 | + | + | + |   |
| Atlg55520 | + | + | + |   |
| Atlg55530 | + | + | + |   |
| Atlg55540 | + | + | + |   |
| Atlg55545 | + | + | + |   |
| Atlg55560 | + | + | + | + |
| Atlg55570 | + | + | + | + |
| Atlg55590 | + | + | + |   |
| Atlg55610 |   |   | + |   |
| Atlg55620 | + | + | + |   |
| Atlg55670 | + | + | + |   |
| Atlg55680 | + | + | + |   |
| Atlg55690 | + | + | + |   |
| Atlg55730 | + | + | + |   |
| Atlg55750 | + | + | + |   |
| Atlg55760 | + | + | + |   |
| Atlg55780 |   | + |   |   |
| Atlg55805 | + | + | + |   |
| Atlg55810 | + | + | + |   |
| Atlg55820 |   | + |   |   |

|           |   |   |   |   |
|-----------|---|---|---|---|
| Atlg55830 | + | + | + |   |
| Atlg55840 | + | + | + |   |
| Atlg55850 | + | + | + |   |
| Atlg55870 | + | + |   |   |
| Atlg55880 |   |   | + |   |
| Atlg55890 | + | + | + |   |
| Atlg55900 | + | + | + |   |
| Atlg55910 |   | + | + |   |
| Atlg55920 | + | + | + |   |
| Atlg55930 | + | + | + |   |
| Atlg55960 | + | + | + |   |
| Atlg55970 | + | + | + |   |
| Atlg56000 | + | + | + |   |
| Atlg56050 | + | + | + |   |
| Atlg56060 | + | + |   |   |
| Atlg56075 | + | + | + |   |
| Atlg56080 | + |   | + |   |
| Atlg56090 | + | + | + |   |
| Atlg56100 |   | + | + | + |
| Atlg56110 | + | + | + |   |
| Atlg56120 | + | + | + |   |
| Atlg56145 | + | + | + |   |
| Atlg56150 | + |   | + |   |
| Atlg56170 | + | + | + |   |
| Atlg56180 | + | + | + |   |
| Atlg56190 | + | + | + |   |
| Atlg56200 | + | + | + |   |
| Atlg56210 | + | + | + |   |
| Atlg56220 | + | + | + |   |
| Atlg56230 | + | + | + |   |
| Atlg56260 | + | + | + |   |
| Atlg56280 | + | + | + |   |
| Atlg56290 | + | + | + |   |
| Atlg56300 | + | + | + |   |
| Atlg56310 |   | + |   |   |
| Atlg56330 | + | + | + |   |
| Atlg56340 | + | + | + |   |
| Atlg56345 |   | + | + |   |
| Atlg56350 | + | + | + |   |
| Atlg56360 | + |   |   | + |
| Atlg56440 | + |   |   |   |
| Atlg56450 | + | + | + |   |
| Atlg56500 | + | + | + |   |
| Atlg56505 | + | + | + |   |
| Atlg56510 | + | + | + |   |
| Atlg56540 |   |   | + |   |
| Atlg56560 | + | + | + |   |
| Atlg56580 | + | + | + |   |
| Atlg56590 | + | + | + |   |
| Atlg56610 | + | + | + |   |
| Atlg56650 |   | + |   |   |
| Atlg56700 | + | + | + |   |

|           |   |   |   |   |
|-----------|---|---|---|---|
| Atlg56710 |   |   | + |   |
| Atlg56720 | + | + | + |   |
| Atlg57540 | + | + | + |   |
| Atlg57550 | + |   |   | + |
| Atlg57590 |   | + |   |   |
| Atlg57600 | + | + | + |   |
| Atlg57620 | + | + | + |   |
| Atlg57680 | + | + | + |   |
| Atlg57700 | + | + | + |   |
| Atlg57750 | + | + | + | + |
| Atlg57760 | + | + | + |   |
| Atlg57770 |   | + | + |   |
| Atlg57790 | + | + | + |   |
| Atlg57820 | + | + | + |   |
| Atlg57830 | + |   |   |   |
| Atlg57860 | + | + | + |   |
| Atlg57870 | + | + | + |   |
| Atlg57990 | + | + | + |   |
| Atlg58032 | + | + | + |   |
| Atlg58050 | + | + | + |   |
| Atlg58080 | + | + | + |   |
| Atlg58100 | + | + | + |   |
| Atlg58110 | + | + |   |   |
| Atlg58120 | + | + |   | + |
| Atlg58170 | + |   | + |   |
| Atlg58180 | + | + | + |   |
| Atlg58200 | + | + | + |   |
| Atlg58220 | + | + | + |   |
| Atlg58230 | + | + | + |   |
| Atlg58250 | + | + | + |   |
| Atlg58270 | + |   |   |   |
| Atlg58290 | + | + | + |   |
| Atlg58340 | + | + | + |   |
| Atlg58360 | + | + | + |   |
| Atlg58370 | + | + | + |   |
| Atlg58380 | + | + | + |   |
| Atlg58420 | + | + | + |   |
| Atlg58430 | + | + | + | + |
| Atlg58440 | + | + | + |   |
| Atlg58470 | + | + | + |   |
| Atlg58848 | + | + | + |   |
| Atlg59124 | + | + | + |   |
| Atlg59500 |   |   | + |   |
| Atlg59520 | + | + | + |   |
| Atlg59540 | + | + | + |   |
| Atlg59560 | + | + | + |   |
| Atlg59580 | + | + | + |   |
| Atlg59600 | + | + | + |   |
| Atlg59610 | + | + | + |   |
| Atlg59620 | + |   |   |   |
| Atlg59650 | + | + | + |   |
| Atlg59660 | + | + |   | + |

|           |   |   |   |   |
|-----------|---|---|---|---|
| Atlg59700 | + | + | + |   |
| Atlg59710 | + | + | + |   |
| Atlg59730 |   |   | + |   |
| Atlg59740 | + | + | + |   |
| Atlg59750 | + | + | + |   |
| Atlg59760 | + | + | + |   |
| Atlg59790 | + |   |   |   |
| Atlg59800 |   |   | + | + |
| Atlg59820 | + | + | + |   |
| Atlg59830 | + | + | + |   |
| Atlg59840 | + | + | + |   |
| Atlg59860 | + |   |   |   |
| Atlg59870 | + | + | + |   |
| Atlg59890 | + | + | + |   |
| Atlg59900 | + | + | + |   |
| Atlg59910 | + | + | + |   |
| Atlg59960 |   | + | + |   |
| Atlg59970 | + | + |   |   |
| Atlg59990 | + | + | + |   |
| Atlg60000 | + | + | + |   |
| Atlg60010 | + | + | + |   |
| Atlg60030 | + | + | + | + |
| Atlg60060 | + | + | + |   |
| Atlg60070 | + | + | + |   |
| Atlg60080 | + | + | + |   |
| Atlg60140 | + | + | + |   |
| Atlg60160 | + | + | + |   |
| Atlg60170 | + | + | + |   |
| Atlg60200 | + | + | + |   |
| Atlg60210 | + |   |   | + |
| Atlg60220 | + | + | + |   |
| Atlg60240 | + | + |   | + |
| Atlg60260 | + | + |   |   |
| Atlg60390 | + | + | + |   |
| Atlg60420 | + | + | + |   |
| Atlg60440 | + | + | + |   |
| Atlg60490 | + | + | + |   |
| Atlg60550 | + | + | + |   |
| Atlg60560 | + | + | + |   |
| Atlg60570 | + |   |   |   |
| Atlg60590 | + | + | + |   |
| Atlg60600 | + | + | + |   |
| Atlg60610 | + | + | + |   |
| Atlg60630 |   |   | + |   |
| Atlg60650 | + | + | + |   |
| Atlg60660 | + | + | + |   |
| Atlg60670 | + | + | + |   |
| Atlg60690 | + | + | + |   |
| Atlg60710 | + | + | + |   |
| Atlg60740 | + | + | + |   |
| Atlg60770 | + | + | + |   |
| Atlg60780 | + | + | + |   |

|           |   |   |   |   |
|-----------|---|---|---|---|
| Atlg60800 | + | + | + |   |
| Atlg60810 | + | + | + |   |
| Atlg60830 | + | + | + |   |
| Atlg60850 | + | + | + |   |
| Atlg60860 | + | + | + |   |
| Atlg60870 | + | + | + |   |
| Atlg60890 | + | + | + |   |
| Atlg60940 | + | + | + |   |
| Atlg60950 | + | + | + |   |
| Atlg60960 | + | + | + |   |
| Atlg60990 | + | + | + |   |
| Atlg61000 | + | + | + |   |
| Atlg61010 | + | + | + |   |
| Atlg61040 | + | + | + |   |
| Atlg61065 | + | + | + |   |
| Atlg61070 | + |   |   | + |
| Atlg61100 | + | + | + |   |
| Atlg61110 | + |   |   | + |
| Atlg61140 | + | + | + |   |
| Atlg61150 | + | + | + |   |
| Atlg61170 | + | + | + |   |
| Atlg61180 | + | + | + |   |
| Atlg61240 | + |   |   |   |
| Atlg61250 | + | + | + |   |
| Atlg61320 |   |   | + | + |
| Atlg61350 | + | + | + |   |
| Atlg61360 | + |   |   |   |
| Atlg61380 | + | + | + |   |
| Atlg61400 |   |   | + |   |
| Atlg61450 | + |   |   |   |
| Atlg61520 | + | + | + |   |
| Atlg61560 | + | + |   |   |
| Atlg61566 | + | + | + | + |
| Atlg61570 | + | + | + |   |
| Atlg61580 | + | + | + |   |
| Atlg61590 | + |   |   |   |
| Atlg61620 | + | + | + |   |
| Atlg61630 | + |   |   |   |
| Atlg61640 | + | + | + |   |
| Atlg61660 | + | + | + |   |
| Atlg61667 | + | + | + |   |
| Atlg61670 | + | + | + |   |
| Atlg61680 | + | + |   | + |
| Atlg61690 | + | + | + |   |
| Atlg61700 | + |   |   | + |
| Atlg61720 |   |   | + | + |
| Atlg61730 | + | + | + |   |
| Atlg61740 | + | + | + |   |
| Atlg61760 |   |   | + | + |
| Atlg61770 | + | + | + |   |
| Atlg61780 | + | + | + |   |
| Atlg61790 | + | + | + |   |



|           |   |   |   |   |
|-----------|---|---|---|---|
| Atlg61800 | + | + | + | + |
| Atlg61810 | + | + | + |   |
| Atlg61820 | + | + | + |   |
| Atlg61850 | + | + | + |   |
| Atlg61860 | + | + | + |   |
| Atlg61870 | + | + | + |   |
| Atlg61890 | + | + | + |   |
| Atlg61900 | + | + | + |   |
| Atlg61930 | + | + | + |   |
| Atlg61990 | + | + | + |   |
| Atlg62010 | + | + | + |   |
| Atlg62020 | + | + | + |   |
| Atlg62030 | + | + | + | + |
| Atlg62040 | + | + | + |   |
| Atlg62045 | + |   | + |   |
| Atlg62130 | + | + | + |   |
| Atlg62180 | + | + | + |   |
| Atlg62200 | + | + | + |   |
| Atlg62250 | + | + | + |   |
| Atlg62280 |   | + |   |   |
| Atlg62290 | + |   |   |   |
| Atlg62300 |   | + |   |   |
| Atlg62310 | + | + | + |   |
| Atlg62330 | + | + | + |   |
| Atlg62360 | + | + | + | + |
| Atlg62380 | + | + | + |   |
| Atlg62390 | + | + | + |   |
| Atlg62420 | + | + | + |   |
| Atlg62430 | + | + | + |   |
| Atlg62450 | + | + |   |   |
| Atlg62480 | + | + | + |   |
| Atlg62500 | + | + | + |   |
| Atlg62570 | + | + | + |   |
| Atlg62610 | + | + | + |   |
| Atlg62630 | + | + | + |   |
| Atlg62640 | + | + | + |   |
| Atlg62660 | + | + | + |   |
| Atlg62710 | + | + |   |   |
| Atlg62730 | + | + | + |   |
| Atlg62740 | + | + | + |   |
| Atlg62750 | + | + | + |   |
| Atlg62763 | + |   |   | + |
| Atlg62770 | + | + | + |   |
| Atlg62780 | + | + | + |   |
| Atlg62790 | + | + | + |   |
| Atlg62800 | + | + | + |   |
| Atlg62810 | + | + | + |   |
| Atlg62820 | + | + | + |   |
| Atlg62830 | + | + | + |   |
| Atlg62850 | + | + | + |   |
| Atlg62870 |   | + | + |   |
| Atlg62880 | + | + | + |   |

|           |   |   |   |   |
|-----------|---|---|---|---|
| Atlg62910 | + |   |   |   |
| Atlg62930 | + | + | + |   |
| Atlg62940 | + |   |   | + |
| Atlg62950 | + |   | + |   |
| Atlg62960 | + | + | + |   |
| Atlg62970 | + | + | + |   |
| Atlg62990 | + | + | + |   |
| Atlg63000 | + | + | + |   |
| Atlg63010 | + | + | + |   |
| Atlg63020 |   | + |   | + |
| Atlg63050 | + | + | + |   |
| Atlg63060 | + |   |   | + |
| Atlg63080 | + | + | + |   |
| Atlg63090 | + | + | + |   |
| Atlg63100 | + | + | + |   |
| Atlg63110 | + | + | + |   |
| Atlg63120 | + | + | + |   |
| Atlg63130 | + | + | + |   |
| Atlg63160 | + | + | + |   |
| Atlg63170 | + | + | + |   |
| Atlg63180 | + | + | + |   |
| Atlg63200 | + |   | + |   |
| Atlg63220 | + | + | + |   |
| Atlg63240 | + | + | + |   |
| Atlg63260 | + | + | + |   |
| Atlg63290 | + | + | + |   |
| Atlg63300 |   |   | + |   |
| Atlg63310 | + | + | + |   |
| Atlg63330 | + | + |   |   |
| Atlg63420 | + | + | + |   |
| Atlg63430 | + | + | + |   |
| Atlg63460 | + | + | + |   |
| Atlg63470 | + | + | + |   |
| Atlg63480 | + | + | + |   |
| Atlg63490 | + | + | + |   |
| Atlg63500 | + | + | + |   |
| Atlg63540 | + | + | + |   |
| Atlg63610 | + | + | + |   |
| Atlg63640 | + | + | + |   |
| Atlg63650 | + | + | + | + |
| Atlg63660 | + | + | + |   |
| Atlg63670 | + | + | + |   |
| Atlg63680 | + | + | + |   |
| Atlg63690 | + | + | + |   |
| Atlg63700 | + | + | + |   |
| Atlg63710 | + | + | + | + |
| Atlg63720 | + | + | + |   |
| Atlg63730 | + | + | + |   |
| Atlg63740 | + | + | + |   |
| Atlg63770 | + | + | + |   |
| Atlg63780 | + | + | + |   |
| Atlg63800 | + | + | + |   |

|           |   |   |   |   |
|-----------|---|---|---|---|
| Atlg63810 | + | + | + |   |
| Atlg63820 |   | + |   |   |
| Atlg63830 | + | + | + |   |
| Atlg63840 | + | + | + |   |
| Atlg63850 | + | + | + |   |
| Atlg63890 | + | + | + |   |
| Atlg63900 | + | + | + |   |
| Atlg63930 | + |   |   |   |
| Atlg63940 | + | + | + |   |
| Atlg63950 |   | + | + | + |
| Atlg63970 | + | + | + |   |
| Atlg63980 | + | + | + |   |
| Atlg64040 | + | + | + |   |
| Atlg64050 | + | + | + |   |
| Atlg64060 | + | + | + |   |
| Atlg64090 | + | + | + |   |
| Atlg64105 | + | + | + |   |
| Atlg64110 | + |   |   |   |
| Atlg64140 | + | + | + |   |
| Atlg64150 | + | + | + |   |
| Atlg64185 | + | + | + |   |
| Atlg64190 | + | + | + |   |
| Atlg64200 | + | + | + |   |
| Atlg64230 | + | + | + |   |
| Atlg64280 | + | + |   |   |
| Atlg64300 | + | + |   | + |
| Atlg64320 | + |   |   | + |
| Atlg64330 | + | + | + |   |
| Atlg64350 | + | + | + |   |
| Atlg64355 | + | + | + |   |
| Atlg64360 |   | + |   |   |
| Atlg64370 |   | + |   |   |
| Atlg64380 | + | + | + |   |
| Atlg64390 | + | + | + |   |
| Atlg64400 |   | + | + |   |
| Atlg64405 |   | + |   |   |
| Atlg64440 | + | + | + |   |
| Atlg64450 | + |   |   |   |
| Atlg64460 | + | + | + |   |
| Atlg64470 | + | + | + |   |
| Atlg64490 |   | + |   |   |
| Atlg64500 | + | + | + |   |
| Atlg64510 | + | + | + |   |
| Atlg64520 | + | + | + |   |
| Atlg64530 | + | + | + |   |
| Atlg64550 | + | + | + |   |
| Atlg64570 | + | + | + |   |
| Atlg64580 | + |   | + |   |
| Atlg64600 | + | + | + |   |
| Atlg64610 | + | + | + |   |
| Atlg64620 | + | + | + |   |
| Atlg64630 | + | + | + |   |

|           |   |   |   |   |
|-----------|---|---|---|---|
| Atlg64640 | + | + | + |   |
| Atlg64650 | + | + | + |   |
| Atlg64660 | + | + | + |   |
| Atlg64670 | + | + | + |   |
| Atlg64680 | + | + | + |   |
| Atlg64690 | + |   | + |   |
| Atlg64720 | + | + | + |   |
| Atlg64740 | + | + | + |   |
| Atlg64750 | + | + | + |   |
| Atlg64770 | + | + | + |   |
| Atlg64780 | + | + | + |   |
| Atlg64790 | + | + | + |   |
| Atlg64800 | + | + |   |   |
| Atlg64810 | + | + | + |   |
| Atlg64830 |   |   | + | + |
| Atlg64850 | + | + | + |   |
| Atlg64860 | + | + | + |   |
| Atlg64880 | + | + | + |   |
| Atlg64890 | + | + | + |   |
| Atlg64900 | + | + | + |   |
| Atlg64960 | + | + | + |   |
| Atlg64970 | + | + | + |   |
| Atlg64980 | + | + | + |   |
| Atlg65010 | + | + | + |   |
| Atlg65020 | + | + | + |   |
| Atlg65040 | + | + | + |   |
| Atlg65060 | + | + | + |   |
| Atlg65070 | + | + | + |   |
| Atlg65080 |   | + |   |   |
| Atlg65170 | + | + |   |   |
| Atlg65190 | + |   |   |   |
| Atlg65220 | + | + | + |   |
| Atlg65230 | + | + | + |   |
| Atlg65240 | + | + | + |   |
| Atlg65260 | + | + | + |   |
| Atlg65270 | + | + | + |   |
| Atlg65280 | + | + | + |   |
| Atlg65290 | + | + | + |   |
| Atlg65295 | + | + | + |   |
| Atlg65330 |   |   | + | + |
| Atlg65360 | + |   |   |   |
| Atlg65370 | + | + | + |   |
| Atlg65380 | + | + | + |   |
| Atlg65400 | + | + |   |   |
| Atlg65410 | + | + | + |   |
| Atlg65420 | + | + | + |   |
| Atlg65430 | + | + | + |   |
| Atlg65440 | + | + | + |   |
| Atlg65445 | + | + | + | + |
| Atlg65450 | + | + | + |   |
| Atlg65470 | + | + | + |   |
| Atlg65480 | + | + | + |   |

|           |   |   |   |   |
|-----------|---|---|---|---|
| Atlg65490 | + | + | + |   |
| Atlg65500 |   | + |   |   |
| Atlg65520 | + | + | + |   |
| Atlg65530 | + | + | + |   |
| Atlg65540 | + | + | + |   |
| Atlg65560 | + | + | + |   |
| Atlg65580 | + | + | + |   |
| Atlg65620 | + | + |   | + |
| Atlg65650 | + | + | + |   |
| Atlg65660 | + | + | + |   |
| Atlg65690 |   | + |   |   |
| Atlg65700 | + | + | + |   |
| Atlg65720 | + | + | + |   |
| Atlg65730 | + | + | + | + |
| Atlg65760 | + |   |   |   |
| Atlg65790 | + | + | + |   |
| Atlg65820 | + | + | + |   |
| Atlg65840 | + | + | + |   |
| Atlg65900 | + | + | + |   |
| Atlg65910 | + | + | + |   |
| Atlg65920 |   | + | + | + |
| Atlg65930 | + | + | + |   |
| Atlg65960 | + | + | + |   |
| Atlg65980 | + | + | + |   |
| Atlg66020 |   |   | + |   |
| Atlg66070 | + | + | + |   |
| Atlg66080 | + | + | + |   |
| Atlg66120 |   | + |   | + |
| Atlg66130 | + |   | + |   |
| Atlg66150 | + | + | + |   |
| Atlg66160 |   | + | + |   |
| Atlg66180 | + | + | + |   |
| Atlg66200 | + | + | + |   |
| Atlg66210 | + | + | + | + |
| Atlg66240 | + | + | + |   |
| Atlg66250 | + | + | + |   |
| Atlg66260 | + | + | + |   |
| Atlg66330 | + | + | + |   |
| Atlg66340 | + | + | + |   |
| Atlg66350 | + | + | + |   |
| Atlg66360 | + | + | + | + |
| Atlg66370 | + |   |   |   |
| Atlg66400 | + | + | + |   |
| Atlg66410 | + | + | + |   |
| Atlg66430 | + | + | + |   |
| Atlg66460 | + |   | + |   |
| Atlg66480 | + | + | + |   |
| Atlg66510 | + |   | + | + |
| Atlg66520 | + | + | + |   |
| Atlg66530 | + | + | + |   |
| Atlg66540 | + | + |   |   |
| Atlg66580 | + | + | + |   |

|           |   |   |   |   |
|-----------|---|---|---|---|
| Atlg66590 | + | + | + |   |
| Atlg66620 |   |   | + |   |
| Atlg66660 | + | + | + |   |
| Atlg66670 | + | + | + |   |
| Atlg66680 | + | + | + |   |
| Atlg66730 | + |   |   |   |
| Atlg66740 | + | + | + |   |
| Atlg66750 | + | + | + |   |
| Atlg66760 | + |   |   |   |
| Atlg66780 |   |   | + |   |
| Atlg66810 | + |   | + |   |
| Atlg66820 | + | + | + |   |
| Atlg66840 | + | + | + |   |
| Atlg66850 | + | + |   | + |
| Atlg66880 | + | + |   |   |
| Atlg66890 | + | + | + |   |
| Atlg66900 | + | + | + |   |
| Atlg66920 | + |   |   |   |
| Atlg66940 | + | + | + |   |
| Atlg66950 | + |   |   |   |
| Atlg66970 | + | + | + |   |
| Atlg66980 | + | + | + |   |
| Atlg67040 | + | + | + |   |
| Atlg67050 | + | + | + |   |
| Atlg67060 | + | + | + |   |
| Atlg67070 | + | + | + |   |
| Atlg67080 | + | + | + |   |
| Atlg67090 | + | + | + |   |
| Atlg67110 | + |   |   |   |
| Atlg67120 | + | + | + |   |
| Atlg67140 | + | + | + |   |
| Atlg67180 | + | + | + |   |
| Atlg67230 | + | + | + |   |
| Atlg67250 | + | + | + |   |
| Atlg67280 | + | + | + |   |
| Atlg67290 | + | + | + |   |
| Atlg67300 | + | + | + |   |
| Atlg67310 | + | + | + |   |
| Atlg67320 | + | + | + |   |
| Atlg67340 | + | + | + |   |
| Atlg67350 | + | + | + |   |
| Atlg67360 | + | + | + |   |
| Atlg67410 | + | + | + |   |
| Atlg67420 | + | + | + |   |
| Atlg67430 | + | + | + |   |
| Atlg67440 | + | + | + |   |
| Atlg67480 | + | + | + |   |
| Atlg67490 | + | + | + |   |
| Atlg67510 | + | + | + |   |
| Atlg67520 | + | + | + |   |
| Atlg67530 | + |   | + |   |
| Atlg67540 | + |   |   | + |

|           |   |   |   |   |
|-----------|---|---|---|---|
| Atlg67550 |   | + |   |   |
| Atlg67560 | + | + | + |   |
| Atlg67570 | + | + | + |   |
| Atlg67580 | + | + | + |   |
| Atlg67590 | + | + | + |   |
| Atlg67620 | + | + | + |   |
| Atlg67630 | + | + | + |   |
| Atlg67640 |   | + | + | + |
| Atlg67660 | + | + | + |   |
| Atlg67680 | + | + | + |   |
| Atlg67690 | + | + | + |   |
| Atlg67700 | + | + | + |   |
| Atlg67720 | + | + | + |   |
| Atlg67730 | + | + | + |   |
| Atlg67740 | + | + | + |   |
| Atlg67750 | + | + | + |   |
| Atlg67760 | + |   |   |   |
| Atlg67800 | + | + | + |   |
| Atlg67810 |   | + |   |   |
| Atlg67820 | + | + | + |   |
| Atlg67830 | + | + | + |   |
| Atlg67840 | + | + | + |   |
| Atlg67850 | + | + | + |   |
| Atlg67860 | + | + | + |   |
| Atlg67865 | + | + | + |   |
| Atlg67870 | + | + | + |   |
| Atlg67880 | + | + | + |   |
| Atlg67890 | + | + | + |   |
| Atlg67910 | + | + | + |   |
| Atlg67920 | + |   |   |   |
| Atlg67930 | + | + | + |   |
| Atlg67940 | + | + | + |   |
| Atlg67950 | + | + | + |   |
| Atlg67960 | + | + | + |   |
| Atlg67970 | + | + | + |   |
| Atlg67980 |   | + |   |   |
| Atlg67990 | + |   |   |   |
| Atlg68000 | + | + | + |   |
| Atlg68010 | + | + | + |   |
| Atlg68020 | + | + | + |   |
| Atlg68050 | + | + | + |   |
| Atlg68060 | + | + | + |   |
| Atlg68070 | + | + | + |   |
| Atlg68080 | + | + | + |   |
| Atlg68090 | + |   |   | + |
| Atlg68100 | + | + | + |   |
| Atlg68110 | + | + | + |   |
| Atlg68130 | + | + | + |   |
| Atlg68140 | + | + | + |   |
| Atlg68160 | + | + | + |   |
| Atlg68170 |   |   | + | + |
| Atlg68185 | + | + | + |   |

|           |   |   |   |
|-----------|---|---|---|
| Atlg68220 | + | + | + |
| Atlg68230 | + | + | + |
| Atlg68250 |   |   | + |
| Atlg68260 | + | + | + |
| Atlg68290 | + | + | + |
| Atlg68300 | + | + | + |
| Atlg68320 | + | + | + |
| Atlg68330 | + | + | + |
| Atlg68340 | + |   |   |
| Atlg68360 | + | + | + |
| Atlg68370 | + | + | + |
| Atlg68400 | + | + | + |
| Atlg68410 | + | + | + |
| Atlg68430 | + | + | + |
| Atlg68440 | + | + | + |
| Atlg68470 | + | + | + |
| Atlg68480 | + | + |   |
| Atlg68490 | + | + | + |
| Atlg68500 | + | + | + |
| Atlg68520 | + | + | + |
| Atlg68530 | + | + | + |
| Atlg68540 | + | + | + |
| Atlg68550 | + | + | + |
| Atlg68560 | + | + | + |
| Atlg68570 | + | + | + |
| Atlg68580 | + | + | + |
| Atlg68585 | + | + | + |
| Atlg68590 | + | + | + |
| Atlg68600 | + |   |   |
| Atlg68610 | + | + | + |
| Atlg68620 |   | + | + |
| Atlg68630 | + |   |   |
| Atlg68650 | + | + | + |
| Atlg68660 | + | + | + |
| Atlg68670 | + | + | + |
| Atlg68680 | + | + | + |
| Atlg68690 | + | + |   |
| Atlg68710 | + | + | + |
| Atlg68720 | + | + | + |
| Atlg68740 | + | + | + |
| Atlg68750 | + | + |   |
| Atlg68760 | + | + | + |
| Atlg68780 | + |   | + |
| Atlg68790 | + | + | + |
| Atlg68810 | + | + | + |
| Atlg68820 | + | + | + |
| Atlg68830 | + | + | + |
| Atlg68875 | + |   | + |
| Atlg68910 | + | + | + |
| Atlg68920 | + | + | + |
| Atlg68980 | + | + | + |
| Atlg68990 | + | + | + |



|           |   |   |   |   |
|-----------|---|---|---|---|
| Atlg69010 | + | + | + |   |
| Atlg69020 | + | + | + |   |
| Atlg69030 | + | + | + |   |
| Atlg69040 | + | + | + |   |
| Atlg69050 | + | + | + | + |
| Atlg69070 | + | + | + |   |
| Atlg69100 |   | + |   | + |
| Atlg69120 | + | + | + | + |
| Atlg69160 | + | + | + |   |
| Atlg69170 | + |   |   |   |
| Atlg69180 | + | + |   | + |
| Atlg69200 | + | + | + |   |
| Atlg69210 | + | + | + |   |
| Atlg69220 | + | + | + |   |
| Atlg69230 |   |   | + |   |
| Atlg69250 | + | + | + |   |
| Atlg69260 | + |   | + |   |
| Atlg69270 | + | + | + |   |
| Atlg69295 | + | + | + |   |
| Atlg69310 |   | + | + |   |
| Atlg69330 | + | + | + |   |
| Atlg69340 | + | + | + |   |
| Atlg69360 | + | + | + |   |
| Atlg69370 | + | + | + |   |
| Atlg69380 | + | + | + |   |
| Atlg69390 | + | + | + |   |
| Atlg69400 | + | + | + |   |
| Atlg69410 | + | + | + |   |
| Atlg69420 | + | + | + |   |
| Atlg69430 | + |   |   |   |
| Atlg69440 | + | + |   |   |
| Atlg69450 | + | + | + |   |
| Atlg69480 | + | + |   |   |
| Atlg69490 | + | + | + |   |
| Atlg69500 | + | + |   | + |
| Atlg69510 | + | + | + |   |
| Atlg69523 | + | + | + |   |
| Atlg69526 | + |   | + |   |
| Atlg69530 | + | + | + |   |
| Atlg69560 | + |   |   |   |
| Atlg69580 | + | + | + |   |
| Atlg69600 | + | + | + |   |
| Atlg69620 | + | + | + |   |
| Atlg69640 | + | + | + |   |
| Atlg69670 | + | + | + |   |
| Atlg69680 | + | + | + |   |
| Atlg69690 | + | + | + |   |
| Atlg69700 | + | + | + |   |
| Atlg69720 | + | + | + |   |
| Atlg69740 | + | + | + |   |
| Atlg69760 | + | + | + |   |
| Atlg69770 | + | + | + |   |

|           |   |   |   |   |
|-----------|---|---|---|---|
| Atlg69780 | + | + | + |   |
| Atlg69790 | + | + | + |   |
| Atlg69800 | + | + | + |   |
| Atlg69820 |   |   | + |   |
| Atlg69830 | + | + | + |   |
| Atlg69840 | + | + | + |   |
| Atlg69850 | + | + | + |   |
| Atlg69870 | + | + | + |   |
| Atlg69880 |   |   | + |   |
| Atlg69890 | + | + | + |   |
| Atlg69910 | + | + | + |   |
| Atlg69935 | + | + | + |   |
| Atlg69950 | + | + | + |   |
| Atlg69960 | + | + | + |   |
| Atlg69980 | + | + | + |   |
| Atlg69990 | + | + |   |   |
| Atlg70000 | + |   | + |   |
| Atlg70060 | + | + | + |   |
| Atlg70070 | + | + | + |   |
| Atlg70090 | + | + | + |   |
| Atlg70100 | + | + | + |   |
| Atlg70140 | + |   |   |   |
| Atlg70160 | + | + | + |   |
| Atlg70170 | + | + |   |   |
| Atlg70180 | + | + | + |   |
| Atlg70190 | + | + | + |   |
| Atlg70200 | + | + | + |   |
| Atlg70210 | + | + | + |   |
| Atlg70230 | + | + | + |   |
| Atlg70250 | + | + | + |   |
| Atlg70270 | + | + | + | + |
| Atlg70280 | + | + | + |   |
| Atlg70290 | + | + | + |   |
| Atlg70300 | + | + | + |   |
| Atlg70310 | + | + | + |   |
| Atlg70320 | + | + | + |   |
| Atlg70330 | + | + | + |   |
| Atlg70350 | + | + | + |   |
| Atlg70360 | + | + | + |   |
| Atlg70370 | + | + | + |   |
| Atlg70410 | + | + | + |   |
| Atlg70430 | + | + |   | + |
| Atlg70470 | + | + | + |   |
| Atlg70480 | + | + | + |   |
| Atlg70490 | + | + | + |   |
| Atlg70500 |   | + |   | + |
| Atlg70510 | + | + | + |   |
| Atlg70520 | + | + | + |   |
| Atlg70530 | + | + | + |   |
| Atlg70550 | + | + | + |   |
| Atlg70560 | + | + | + |   |
| Atlg70570 | + | + | + |   |

|           |   |   |   |
|-----------|---|---|---|
| Atlg70580 | + | + | + |
| Atlg70590 | + | + | + |
| Atlg70610 | + | + | + |
| Atlg70620 | + | + | + |
| Atlg70630 | + | + | + |
| Atlg70650 | + |   | + |
| Atlg70660 | + | + | + |
| Atlg70670 | + | + | + |
| Atlg70690 | + |   |   |
| Atlg70700 | + | + | + |
| Atlg70710 | + | + | + |
| Atlg70720 | + | + |   |
| Atlg70730 | + | + | + |
| Atlg70740 | + | + | + |
| Atlg70750 |   |   | + |
| Atlg70760 | + | + | + |
| Atlg70770 | + | + | + |
| Atlg70780 | + | + | + |
| Atlg70790 | + | + | + |
| Atlg70810 | + | + |   |
| Atlg70820 |   | + |   |
| Atlg70830 | + | + | + |
| Atlg70895 | + | + | + |
| Atlg70900 | + | + | + |
| Atlg70940 | + | + | + |
| Atlg70980 | + | + | + |
| Atlg70985 |   | + | + |
| Atlg70990 | + |   | + |
| Atlg71010 | + | + | + |
| Atlg71020 | + | + | + |
| Atlg71030 | + | + | + |
| Atlg71040 | + | + | + |
| Atlg71050 | + | + | + |
| Atlg71070 | + | + | + |
| Atlg71080 | + | + | + |
| Atlg71090 | + | + | + |
| Atlg71130 | + | + | + |
| Atlg71140 | + | + |   |
| Atlg71160 | + |   |   |
| Atlg71170 | + | + | + |
| Atlg71180 | + |   |   |
| Atlg71190 | + | + | + |
| Atlg71210 | + | + | + |
| Atlg71220 | + | + | + |
| Atlg71230 |   |   | + |
| Atlg71260 | + | + | + |
| Atlg71300 | + | + | + |
| Atlg71310 | + | + | + |
| Atlg71330 | + | + | + |
| Atlg71340 | + | + | + |
| Atlg71350 | + | + | + |
| Atlg71410 | + | + | + |

|           |   |   |   |   |
|-----------|---|---|---|---|
| Atlg71430 | + | + | + |   |
| Atlg71440 | + | + | + |   |
| Atlg71460 | + | + | + |   |
| Atlg71480 | + | + | + |   |
| Atlg71500 | + | + | + |   |
| Atlg71680 | + |   |   | + |
| Atlg71690 |   |   | + | + |
| Atlg71691 |   | + | + |   |
| Atlg71695 | + | + | + |   |
| Atlg71696 | + | + | + |   |
| Atlg71697 | + | + | + |   |
| Atlg71710 | + | + | + |   |
| Atlg71720 | + | + | + |   |
| Atlg71730 | + | + | + |   |
| Atlg71750 | + | + | + |   |
| Atlg71770 | + | + | + |   |
| Atlg71780 | + | + | + |   |
| Atlg71790 | + | + | + |   |
| Atlg71800 | + | + | + |   |
| Atlg71810 | + | + | + |   |
| Atlg71820 | + | + | + |   |
| Atlg71830 | + | + | + |   |
| Atlg71840 | + | + | + |   |
| Atlg71850 | + | + | + |   |
| Atlg71860 | + | + | + |   |
| Atlg71870 | + | + | + |   |
| Atlg71880 | + | + | + |   |
| Atlg71890 |   | + | + | + |
| Atlg71900 | + | + | + |   |
| Atlg71910 | + |   | + |   |
| Atlg71920 | + | + | + |   |
| Atlg71940 | + | + | + |   |
| Atlg71950 | + | + | + |   |
| Atlg71960 | + | + |   |   |
| Atlg71970 | + | + | + |   |
| Atlg71980 | + | + | + |   |
| Atlg72020 | + | + | + |   |
| Atlg72030 | + | + | + |   |
| Atlg72040 | + | + | + |   |
| Atlg72050 | + | + | + |   |
| Atlg72070 |   | + | + |   |
| Atlg72090 | + | + | + |   |
| Atlg72110 |   | + | + | + |
| Atlg72120 | + | + |   |   |
| Atlg72150 | + | + | + |   |
| Atlg72160 | + | + | + |   |
| Atlg72170 | + | + | + |   |
| Atlg72175 | + | + | + |   |
| Atlg72180 | + | + | + |   |
| Atlg72190 | + | + | + |   |
| Atlg72230 | + | + | + |   |
| Atlg72240 | + | + | + |   |

|           |   |   |   |   |
|-----------|---|---|---|---|
| Atlg72250 | + | + | + |   |
| Atlg72260 | + | + | + |   |
| Atlg72280 | + | + | + |   |
| Atlg72290 | + | + | + | + |
| Atlg72300 | + |   |   |   |
| Atlg72310 | + | + | + |   |
| Atlg72320 | + | + | + |   |
| Atlg72340 | + | + | + |   |
| Atlg72370 | + | + | + |   |
| Atlg72390 | + | + | + |   |
| Atlg72420 | + | + | + |   |
| Atlg72430 | + | + | + |   |
| Atlg72440 | + | + | + |   |
| Atlg72450 | + | + | + |   |
| Atlg72460 | + | + |   | + |
| Atlg72470 | + | + | + |   |
| Atlg72480 | + | + | + |   |
| Atlg72500 | + | + | + |   |
| Atlg72510 | + | + | + |   |
| Atlg72550 | + | + | + |   |
| Atlg72560 | + | + | + |   |
| Atlg72580 |   |   | + | + |
| Atlg72610 | + | + | + |   |
| Atlg72630 | + | + | + |   |
| Atlg72640 | + | + | + |   |
| Atlg72650 | + | + | + |   |
| Atlg72680 | + | + | + |   |
| Atlg72700 | + | + | + |   |
| Atlg72710 | + | + | + |   |
| Atlg72730 | + | + | + |   |
| Atlg72740 | + | + | + |   |
| Atlg72750 | + | + | + |   |
| Atlg72770 | + | + | + |   |
| Atlg72790 | + | + | + |   |
| Atlg72800 | + | + | + |   |
| Atlg72810 | + | + | + |   |
| Atlg72820 | + | + | + |   |
| Atlg72830 | + | + | + |   |
| Atlg72850 | + |   |   |   |
| Atlg72900 |   | + |   |   |
| Atlg72920 | + |   |   |   |
| Atlg72930 | + | + | + |   |
| Atlg72940 | + |   |   |   |
| Atlg72960 | + |   |   | + |
| Atlg72970 | + | + | + |   |
| Atlg72990 | + | + | + |   |
| Atlg73000 |   |   | + |   |
| Atlg73010 | + | + | + |   |
| Atlg73020 | + | + | + |   |
| Atlg73030 | + | + | + |   |
| Atlg73040 |   |   | + |   |
| Atlg73060 | + | + | + |   |

|           |   |   |   |   |
|-----------|---|---|---|---|
| Atlg73080 | + | + | + |   |
| Atlg73090 | + | + | + |   |
| Atlg73100 | + | + | + |   |
| Atlg73110 | + | + | + |   |
| Atlg73130 | + | + | + |   |
| Atlg73150 | + | + | + |   |
| Atlg73170 | + | + | + |   |
| Atlg73177 | + | + | + |   |
| Atlg73180 | + | + | + |   |
| Atlg73200 | + | + | + |   |
| Atlg73220 | + | + | + |   |
| Atlg73230 | + | + | + |   |
| Atlg73240 | + | + | + |   |
| Atlg73250 | + | + | + |   |
| Atlg73260 |   |   | + |   |
| Atlg73310 | + | + |   |   |
| Atlg73320 | + | + | + |   |
| Atlg73350 | + | + | + |   |
| Atlg73360 | + |   |   |   |
| Atlg73370 | + | + | + |   |
| Atlg73380 | + | + | + |   |
| Atlg73390 | + | + | + |   |
| Atlg73400 | + |   |   |   |
| Atlg73410 | + |   |   |   |
| Atlg73430 | + | + | + |   |
| Atlg73440 | + | + | + |   |
| Atlg73460 | + | + | + |   |
| Atlg73470 | + | + | + |   |
| Atlg73480 | + | + | + |   |
| Atlg73490 | + | + | + |   |
| Atlg73500 | + | + | + |   |
| Atlg73530 |   |   | + |   |
| Atlg73540 | + | + | + |   |
| Atlg73560 |   |   | + | + |
| Atlg73570 | + | + | + |   |
| Atlg73590 | + | + | + |   |
| Atlg73600 | + | + | + |   |
| Atlg73610 | + | + | + |   |
| Atlg73620 | + | + | + |   |
| Atlg73630 | + | + | + |   |
| Atlg73640 | + | + | + |   |
| Atlg73650 | + | + | + |   |
| Atlg73655 | + | + | + |   |
| Atlg73660 | + | + | + |   |
| Atlg73670 | + |   | + |   |
| Atlg73680 | + | + | + |   |
| Atlg73700 | + |   |   | + |
| Atlg73720 | + | + | + |   |
| Atlg73730 | + | + | + |   |
| Atlg73740 | + | + | + |   |
| Atlg73750 | + | + | + |   |
| Atlg73760 | + | + | + |   |

|           |   |   |   |   |
|-----------|---|---|---|---|
| Atlg73790 | + | + | + |   |
| Atlg73800 | + | + | + |   |
| Atlg73820 | + | + | + |   |
| Atlg73830 | + | + | + |   |
| Atlg73840 | + | + | + |   |
| Atlg73860 | + | + | + |   |
| Atlg73885 | + | + | + |   |
| Atlg73920 | + | + | + |   |
| Atlg73930 | + | + | + |   |
| Atlg73940 | + | + | + |   |
| Atlg73950 | + | + | + |   |
| Atlg73960 | + | + | + |   |
| Atlg73970 | + | + | + |   |
| Atlg73980 | + | + | + |   |
| Atlg73990 | + | + | + |   |
| Atlg74000 | + | + | + | + |
| Atlg74010 | + | + | + | + |
| Atlg74020 | + | + | + |   |
| Atlg74030 | + | + | + |   |
| Atlg74040 | + | + | + |   |
| Atlg74055 | + | + | + |   |
| Atlg74060 | + | + | + |   |
| Atlg74070 | + | + | + |   |
| Atlg74090 | + | + | + |   |
| Atlg74100 | + | + | + |   |
| Atlg74140 | + |   |   | + |
| Atlg74150 | + |   |   |   |
| Atlg74160 | + | + | + |   |
| Atlg74170 | + | + | + |   |
| Atlg74180 | + | + |   |   |
| Atlg74210 | + | + | + |   |
| Atlg74230 | + | + | + |   |
| Atlg74240 | + | + | + |   |
| Atlg74250 | + | + | + |   |
| Atlg74260 | + | + | + |   |
| Atlg74270 | + | + | + |   |
| Atlg74290 | + | + | + |   |
| Atlg74310 | + |   | + |   |
| Atlg74320 | + | + | + |   |
| Atlg74330 | + | + | + |   |
| Atlg74340 | + | + | + |   |
| Atlg74360 |   | + | + |   |
| Atlg74370 | + | + | + |   |
| Atlg74380 | + | + | + |   |
| Atlg74410 | + | + | + |   |
| Atlg74420 | + | + | + |   |
| Atlg74430 | + | + | + |   |
| Atlg74440 | + |   | + |   |
| Atlg74450 | + | + | + |   |
| Atlg74460 | + |   |   |   |
| Atlg74470 | + | + | + |   |
| Atlg74490 | + | + | + |   |

|           |   |   |   |   |
|-----------|---|---|---|---|
| Atlg74510 | + | + | + |   |
| Atlg74520 | + | + | + |   |
| Atlg74530 | + | + | + |   |
| Atlg74540 | + |   |   | + |
| Atlg74550 | + | + |   |   |
| Atlg74560 | + | + | + |   |
| Atlg74600 | + | + | + |   |
| Atlg74640 | + | + | + |   |
| Atlg74650 |   |   | + |   |
| Atlg74660 |   |   | + |   |
| Atlg74670 | + | + | + |   |
| Atlg74680 | + | + | + |   |
| Atlg74690 | + | + | + |   |
| Atlg74700 | + | + | + |   |
| Atlg74710 | + | + | + |   |
| Atlg74720 | + | + | + |   |
| Atlg74730 | + | + | + |   |
| Atlg74740 | + | + | + |   |
| Atlg74750 | + | + | + |   |
| Atlg74780 | + |   | + |   |
| Atlg74790 | + | + | + |   |
| Atlg74800 | + | + | + |   |
| Atlg74810 |   |   | + |   |
| Atlg74820 |   | + |   |   |
| Atlg74840 | + | + | + |   |
| Atlg74850 | + | + | + |   |
| Atlg74860 | + | + | + |   |
| Atlg74880 | + | + | + |   |
| Atlg74890 |   |   | + |   |
| Atlg74900 | + | + | + |   |
| Atlg74910 | + | + | + |   |
| Atlg74920 | + | + | + |   |
| Atlg74930 | + |   |   |   |
| Atlg74940 | + | + | + |   |
| Atlg74950 | + | + | + |   |
| Atlg74960 | + | + | + |   |
| Atlg74970 | + | + | + |   |
| Atlg74990 | + |   | + |   |
| Atlg75010 |   |   | + |   |
| Atlg75020 | + | + | + |   |
| Atlg75030 | + | + | + |   |
| Atlg75040 |   | + |   |   |
| Atlg75050 | + | + |   | + |
| Atlg75090 | + | + | + |   |
| Atlg75100 | + | + | + |   |
| Atlg75110 | + |   |   | + |
| Atlg75140 | + | + | + |   |
| Atlg75150 | + | + | + |   |
| Atlg75160 | + |   |   |   |
| Atlg75170 | + | + | + |   |
| Atlg75180 | + | + | + |   |
| Atlg75190 | + | + | + |   |



|           |   |   |   |   |
|-----------|---|---|---|---|
| Atlg75200 | + | + | + |   |
| Atlg75210 | + | + | + |   |
| Atlg75220 | + | + | + |   |
| Atlg75230 | + | + | + |   |
| Atlg75240 | + | + | + |   |
| Atlg75270 | + | + | + |   |
| Atlg75280 | + | + | + |   |
| Atlg75290 | + | + |   | + |
| Atlg75300 | + | + |   | + |
| Atlg75310 | + | + | + |   |
| Atlg75330 | + | + | + |   |
| Atlg75340 | + | + | + |   |
| Atlg75350 | + | + | + |   |
| Atlg75370 | + | + | + |   |
| Atlg75390 | + | + | + |   |
| Atlg75400 | + | + |   |   |
| Atlg75410 | + | + | + |   |
| Atlg75420 | + | + | + |   |
| Atlg75440 | + | + | + |   |
| Atlg75450 | + | + | + |   |
| Atlg75460 | + | + | + |   |
| Atlg75500 | + | + | + |   |
| Atlg75510 | + | + | + |   |
| Atlg75520 | + | + |   | + |
| Atlg75560 | + | + | + |   |
| Atlg75580 | + | + | + | + |
| Atlg75590 |   |   | + |   |
| Atlg75600 |   |   | + |   |
| Atlg75630 | + | + | + |   |
| Atlg75640 | + | + | + |   |
| Atlg75660 | + | + | + |   |
| Atlg75670 | + | + | + |   |
| Atlg75680 | + | + | + |   |
| Atlg75690 | + | + | + |   |
| Atlg75710 | + | + | + |   |
| Atlg75730 | + | + | + |   |
| Atlg75750 | + | + | + |   |
| Atlg75760 | + | + | + |   |
| Atlg75770 | + |   | + |   |
| Atlg75780 | + | + | + |   |
| Atlg75790 | + |   |   | + |
| Atlg75800 | + | + | + |   |
| Atlg75810 | + | + | + |   |
| Atlg75820 | + | + | + |   |
| Atlg75840 | + | + | + |   |
| Atlg75850 | + | + | + |   |
| Atlg75860 | + | + | + |   |
| Atlg75870 | + | + | + | + |
| Atlg75880 | + | + |   |   |
| Atlg75890 | + |   |   | + |
| Atlg75900 | + | + | + |   |
| Atlg75910 | + |   |   | + |

|           |   |   |   |   |
|-----------|---|---|---|---|
| Atlg75920 | + |   |   | + |
| Atlg75930 | + |   |   | + |
| Atlg75940 | + |   |   | + |
| Atlg75950 | + | + | + |   |
| Atlg75980 | + | + | + |   |
| Atlg75990 | + | + | + |   |
| Atlg76010 | + | + | + |   |
| Atlg76020 | + | + | + |   |
| Atlg76030 | + | + | + |   |
| Atlg76040 | + | + | + |   |
| Atlg76060 | + | + | + |   |
| Atlg76080 | + | + | + |   |
| Atlg76090 | + | + | + |   |
| Atlg76100 | + | + | + |   |
| Atlg76110 | + | + | + |   |
| Atlg76120 | + | + | + |   |
| Atlg76130 | + | + | + |   |
| Atlg76140 | + | + | + |   |
| Atlg76150 | + | + | + |   |
| Atlg76160 | + | + | + |   |
| Atlg76170 | + | + | + |   |
| Atlg76180 | + | + | + |   |
| Atlg76185 | + |   |   |   |
| Atlg76200 | + | + | + |   |
| Atlg76230 | + |   | + |   |
| Atlg76240 | + | + | + |   |
| Atlg76250 | + |   |   | + |
| Atlg76260 | + | + | + |   |
| Atlg76270 | + | + | + |   |
| Atlg76290 |   |   | + | + |
| Atlg76300 | + | + | + |   |
| Atlg76310 | + | + | + |   |
| Atlg76320 | + | + | + |   |
| Atlg76340 | + | + | + |   |
| Atlg76350 | + | + | + |   |
| Atlg76370 | + | + | + | + |
| Atlg76380 | + | + | + |   |
| Atlg76390 | + | + | + |   |
| Atlg76400 | + | + | + |   |
| Atlg76405 | + | + | + |   |
| Atlg76410 | + | + | + |   |
| Atlg76420 | + | + |   |   |
| Atlg76450 | + | + | + |   |
| Atlg76460 | + | + | + |   |
| Atlg76470 | + |   |   | + |
| Atlg76490 | + | + | + |   |
| Atlg76510 | + | + | + |   |
| Atlg76520 | + | + | + |   |
| Atlg76540 | + | + | + |   |
| Atlg76550 | + | + | + |   |
| Atlg76560 |   | + |   |   |
| Atlg76570 | + | + | + |   |

|           |   |   |   |   |
|-----------|---|---|---|---|
| Atlg76580 | + | + | + |   |
| Atlg76590 |   | + |   |   |
| Atlg76600 | + | + |   |   |
| Atlg76620 | + | + | + |   |
| Atlg76630 | + | + | + |   |
| Atlg76660 | + | + | + |   |
| Atlg76670 | + | + | + |   |
| Atlg76690 | + | + | + |   |
| Atlg76700 | + | + | + |   |
| Atlg76710 | + | + | + |   |
| Atlg76730 | + | + | + |   |
| Atlg76740 | + | + | + |   |
| Atlg76760 | + | + | + |   |
| Atlg76780 | + |   |   |   |
| Atlg76810 | + | + | + |   |
| Atlg76820 | + |   | + |   |
| Atlg76825 | + | + | + |   |
| Atlg76850 | + | + | + |   |
| Atlg76860 | + | + | + |   |
| Atlg76870 | + |   |   |   |
| Atlg76880 | + | + | + |   |
| Atlg76890 | + | + | + |   |
| Atlg76900 | + | + | + |   |
| Atlg76920 | + | + | + |   |
| Atlg76930 |   | + | + |   |
| Atlg76940 | + | + | + |   |
| Atlg76950 | + | + | + |   |
| Atlg76970 | + | + | + |   |
| Atlg76990 | + | + | + |   |
| Atlg77000 | + | + | + |   |
| Atlg77020 | + | + | + |   |
| Atlg77050 | + | + | + |   |
| Atlg77060 | + | + | + |   |
| Atlg77080 | + | + | + |   |
| Atlg77080 | + | + | + |   |
| Atlg77090 | + | + | + |   |
| Atlg77095 |   |   | + |   |
| Atlg77110 | + | + |   |   |
| Atlg77120 | + | + | + |   |
| Atlg77130 | + | + | + |   |
| Atlg77140 | + | + | + |   |
| Atlg77170 | + | + | + |   |
| Atlg77180 | + | + | + |   |
| Atlg77210 | + |   | + |   |
| Atlg77220 | + | + | + |   |
| Atlg77230 | + | + | + | + |
| Atlg77250 | + | + | + |   |
| Atlg77260 | + | + | + |   |
| Atlg77270 | + | + | + | + |
| Atlg77280 |   | + |   |   |
| Atlg77300 | + |   | + |   |
| Atlg77310 | + |   |   |   |

|           |   |   |   |   |
|-----------|---|---|---|---|
| Atlg77350 | + | + | + |   |
| Atlg77360 | + | + |   |   |
| Atlg77370 | + | + | + |   |
| Atlg77390 | + |   |   |   |
| Atlg77410 | + | + | + |   |
| Atlg77420 | + | + | + |   |
| Atlg77440 | + | + | + |   |
| Atlg77460 | + | + | + |   |
| Atlg77470 | + | + | + |   |
| Atlg77480 | + | + | + |   |
| Atlg77490 | + | + | + |   |
| Atlg77500 | + | + | + |   |
| Atlg77510 | + | + | + |   |
| Atlg77530 | + |   | + |   |
| Atlg77540 | + | + | + |   |
| Atlg77550 | + | + | + |   |
| Atlg77570 | + | + | + |   |
| Atlg77580 | + | + | + |   |
| Atlg77590 | + | + | + |   |
| Atlg77600 | + | + | + |   |
| Atlg77610 | + | + | + |   |
| Atlg77630 | + | + | + |   |
| Atlg77640 | + | + | + |   |
| Atlg77660 | + | + |   |   |
| Atlg77670 | + | + | + |   |
| Atlg77680 | + | + | + |   |
| Atlg77690 | + | + | + |   |
| Atlg77700 | + |   | + |   |
| Atlg77710 | + | + | + |   |
| Atlg77720 |   | + | + |   |
| Atlg77730 | + | + |   |   |
| Atlg77740 | + | + | + |   |
| Atlg77750 | + | + | + |   |
| Atlg77760 | + | + | + |   |
| Atlg77770 | + | + | + |   |
| Atlg77800 | + | + | + |   |
| Atlg77810 | + | + | + |   |
| Atlg77840 | + | + | + |   |
| Atlg77850 | + | + | + |   |
| Atlg77870 | + | + | + |   |
| Atlg77890 | + |   |   |   |
| Atlg77900 | + | + | + |   |
| Atlg77920 | + | + | + |   |
| Atlg77930 | + | + | + |   |
| Atlg77940 | + | + | + |   |
| Atlg77980 | + | + |   | + |
| Atlg77990 |   |   | + |   |
| Atlg78000 | + |   |   |   |
| Atlg78010 | + | + | + |   |
| Atlg78020 | + | + | + |   |
| Atlg78040 | + | + | + |   |
| Atlg78050 | + | + | + |   |

|           |   |   |   |
|-----------|---|---|---|
| Atlg78060 | + | + | + |
| Atlg78070 | + | + | + |
| Atlg78080 | + | + | + |
| Atlg78090 | + | + | + |
| Atlg78100 | + | + | + |
| Atlg78110 | + | + | + |
| Atlg78120 |   |   | + |
| Atlg78130 | + | + | + |
| Atlg78140 | + | + | + |
| Atlg78150 | + | + | + |
| Atlg78160 | + |   |   |
| Atlg78170 | + | + | + |
| Atlg78180 | + | + | + |
| Atlg78200 | + | + | + |
| Atlg78210 | + | + | + |
| Atlg78240 | + | + | + |
| Atlg78280 | + | + | + |
| Atlg78290 | + | + | + |
| Atlg78300 | + | + | + |
| Atlg78310 | + | + | + |
| Atlg78320 |   |   | + |
| Atlg78370 | + | + | + |
| Atlg78380 | + | + | + |
| Atlg78410 |   | + |   |
| Atlg78420 | + | + | + |
| Atlg78430 | + | + | + |
| Atlg78440 | + |   | + |
| Atlg78450 |   | + | + |
| Atlg78460 | + | + | + |
| Atlg78480 | + | + | + |
| Atlg78490 | + | + | + |
| Atlg78510 | + | + | + |
| Atlg78530 | + |   |   |
| Atlg78550 | + | + | + |
| Atlg78560 | + | + | + |
| Atlg78570 | + | + | + |
| Atlg78580 | + | + | + |
| Atlg78600 | + | + | + |
| Atlg78610 | + | + | + |
| Atlg78620 | + | + | + |
| Atlg78630 | + | + | + |
| Atlg78650 | + | + | + |
| Atlg78660 | + |   | + |
| Atlg78670 | + | + | + |
| Atlg78680 | + | + | + |
| Atlg78690 | + | + | + |
| Atlg78700 | + | + | + |
| Atlg78720 | + |   |   |
| Atlg78750 | + |   | + |
| Atlg78770 | + | + | + |
| Atlg78780 | + | + | + |
| Atlg78790 | + | + | + |

|           |   |   |   |   |
|-----------|---|---|---|---|
| Atlg78800 | + | + | + |   |
| Atlg78810 | + | + | + |   |
| Atlg78815 |   |   | + |   |
| Atlg78820 | + | + | + |   |
| Atlg78840 | + |   |   |   |
| Atlg78860 | + | + |   |   |
| Atlg78870 | + | + | + |   |
| Atlg78890 | + | + | + |   |
| Atlg78895 | + | + | + |   |
| Atlg78900 | + | + | + |   |
| Atlg78920 | + | + | + |   |
| Atlg78930 | + | + | + |   |
| Atlg78940 | + | + | + | + |
| Atlg78950 |   | + |   |   |
| Atlg78960 | + | + | + | + |
| Atlg78970 |   | + | + |   |
| Atlg78980 | + | + |   |   |
| Atlg79010 | + | + | + |   |
| Atlg79030 | + | + | + |   |
| Atlg79040 | + | + | + |   |
| Atlg79050 | + | + | + |   |
| Atlg79080 | + | + | + |   |
| Atlg79090 | + | + | + |   |
| Atlg79110 | + | + | + |   |
| Atlg79140 | + | + | + |   |
| Atlg79150 | + | + | + |   |
| Atlg79160 | + | + | + |   |
| Atlg79180 |   | + | + |   |
| Atlg79190 | + | + | + |   |
| Atlg79200 | + | + | + | + |
| Atlg79210 | + | + | + |   |
| Atlg79230 | + | + | + |   |
| Atlg79250 | + |   |   |   |
| Atlg79260 | + | + | + |   |
| Atlg79270 | + | + | + |   |
| Atlg79280 | + | + | + |   |
| Atlg79340 | + | + | + |   |
| Atlg79350 | + | + | + |   |
| Atlg79360 | + | + | + |   |
| Atlg79380 | + | + | + |   |
| Atlg79390 | + | + | + |   |
| Atlg79400 | + | + |   | + |
| Atlg79410 | + |   | + |   |
| Atlg79420 | + | + | + |   |
| Atlg79430 | + | + | + |   |
| Atlg79440 | + | + | + |   |
| Atlg79450 | + | + |   |   |
| Atlg79460 | + | + | + |   |
| Atlg79470 | + | + | + |   |
| Atlg79490 | + | + | + |   |
| Atlg79500 | + | + | + |   |
| Atlg79510 | + | + | + |   |

|           |   |   |   |   |
|-----------|---|---|---|---|
| Atlg79520 | + | + | + |   |
| Atlg79530 | + | + | + |   |
| Atlg79550 | + | + | + |   |
| Atlg79560 | + | + | + |   |
| Atlg79570 | + | + | + |   |
| Atlg79580 | + |   | + |   |
| Atlg79590 | + | + | + |   |
| Atlg79600 | + | + | + |   |
| Atlg79610 | + | + | + |   |
| Atlg79620 | + |   | + |   |
| Atlg79630 | + | + | + |   |
| Atlg79640 | + | + | + |   |
| Atlg79650 | + | + | + |   |
| Atlg79660 | + | + | + |   |
| Atlg79670 | + | + | + |   |
| Atlg79690 | + | + | + |   |
| Atlg79700 | + |   |   |   |
| Atlg79710 | + | + | + |   |
| Atlg79720 | + | + | + |   |
| Atlg79730 | + | + | + |   |
| Atlg79750 | + | + | + |   |
| Atlg79780 | + |   |   | + |
| Atlg79790 | + | + | + |   |
| Atlg79800 | + |   |   | + |
| Atlg79810 | + | + | + |   |
| Atlg79820 | + | + | + |   |
| Atlg79830 | + | + | + |   |
| Atlg79840 |   |   | + |   |
| Atlg79850 | + | + | + |   |
| Atlg79860 | + | + |   |   |
| Atlg79870 | + | + | + |   |
| Atlg79880 | + | + | + |   |
| Atlg79890 | + | + |   |   |
| Atlg79900 | + | + | + |   |
| Atlg79910 | + | + |   | + |
| Atlg79920 | + | + | + |   |
| Atlg79940 | + | + | + |   |
| Atlg79950 | + | + | + |   |
| Atlg79970 | + | + | + |   |
| Atlg79975 | + | + | + |   |
| Atlg79990 | + | + | + |   |
| Atlg80000 | + | + | + |   |
| Atlg80020 | + | + | + |   |
| Atlg80030 | + | + | + |   |
| Atlg80040 | + | + | + |   |
| Atlg80050 | + | + | + |   |
| Atlg80060 | + | + | + |   |
| Atlg80070 | + | + | + |   |
| Atlg80080 | + | + |   |   |
| Atlg80110 | + |   |   |   |
| Atlg80130 | + |   |   |   |
| Atlg80160 | + | + | + |   |

|           |   |   |   |   |
|-----------|---|---|---|---|
| Atlg80170 | + | + | + |   |
| Atlg80180 | + | + | + |   |
| Atlg80190 | + | + | + |   |
| Atlg80210 | + | + | + |   |
| Atlg80230 | + | + | + |   |
| Atlg80240 |   | + |   |   |
| Atlg80245 | + | + | + |   |
| Atlg80260 | + | + | + |   |
| Atlg80270 | + | + | + |   |
| Atlg80280 | + | + | + |   |
| Atlg80290 | + | + | + |   |
| Atlg80310 | + | + | + |   |
| Atlg80330 |   |   | + | + |
| Atlg80350 | + | + | + |   |
| Atlg80360 | + | + | + |   |
| Atlg80370 | + | + |   |   |
| Atlg80380 | + | + | + |   |
| Atlg80400 | + | + | + |   |
| Atlg80410 | + | + | + |   |
| Atlg80420 | + | + | + |   |
| Atlg80440 | + | + | + |   |
| Atlg80460 | + | + | + |   |
| Atlg80480 | + | + | + |   |
| Atlg80500 | + | + | + |   |
| Atlg80510 | + | + | + |   |
| Atlg80520 |   |   | + |   |
| Atlg80530 | + | + | + |   |
| Atlg80550 | + | + | + |   |
| Atlg80560 | + | + | + |   |
| Atlg80570 | + | + |   |   |
| Atlg80600 | + | + | + |   |
| Atlg80615 | + | + | + |   |
| Atlg80630 | + | + | + |   |
| Atlg80640 | + | + | + |   |
| Atlg80660 | + |   |   | + |
| Atlg80670 | + | + | + |   |
| Atlg80680 | + | + | + |   |
| Atlg80690 | + | + | + |   |
| Atlg80700 | + | + | + |   |
| Atlg80720 | + | + | + |   |
| Atlg80750 | + | + | + |   |
| Atlg80760 | + | + | + |   |
| Atlg80770 | + | + | + |   |
| Atlg80780 | + | + | + |   |
| Atlg80790 | + | + | + |   |
| Atlg80800 | + | + | + |   |
| Atlg80810 | + |   |   | + |
| Atlg80820 | + |   |   |   |
| Atlg80830 | + | + | + |   |
| Atlg80840 | + |   |   |   |
| Atlg80850 | + | + | + |   |
| Atlg80860 | + | + | + |   |



|           |   |   |   |
|-----------|---|---|---|
| At1g80870 | + | + | + |
| At1g80900 | + | + | + |
| At1g80910 | + | + | + |
| At1g80920 | + | + | + |
| At1g80930 | + | + | + |
| At1g80940 | + | + | + |
| At1g80950 | + | + | + |
| At2g01060 | + | + | + |
| At2g01070 | + | + | + |
| At2g01080 | + | + | + |
| At2g01100 | + | + | + |
| At2g01110 | + | + | + |
| At2g01120 | + | + | + |
| At2g01140 | + | + | + |
| At2g01150 | + | + | + |
| At2g01170 | + | + | + |
| At2g01190 | + | + | + |
| At2g01210 | + |   | + |
| At2g01220 | + | + | + |
| At2g01230 | + | + | + |
| At2g01250 | + | + | + |
| At2g01260 | + | + | + |
| At2g01270 | + | + | + |
| At2g01290 | + | + | + |
| At2g01300 |   | + |   |
| At2g01320 | + | + | + |
| At2g01330 | + | + | + |
| At2g01350 | + | + | + |
| At2g01400 | + | + | + |
| At2g01410 | + | + | + |
| At2g01420 | + | + | + |
| At2g01450 | + | + | + |
| At2g01470 | + | + | + |
| At2g01480 | + | + | + |
| At2g01490 | + | + | + |
| At2g01510 | + | + | + |
| At2g01520 | + | + | + |
| At2g01540 | + | + | + |
| At2g01570 | + | + | + |
| At2g01580 | + |   | + |
| At2g01590 | + | + | + |
| At2g01600 | + | + | + |
| At2g01610 | + | + | + |
| At2g01620 | + | + | + |
| At2g01630 | + | + | + |
| At2g01640 | + | + | + |
| At2g01650 | + | + | + |
| At2g01670 | + | + | + |
| At2g01680 | + | + | + |
| At2g01690 | + | + | + |
| At2g01710 | + | + | + |
| At2g01720 | + | + | + |

|           |   |   |   |   |
|-----------|---|---|---|---|
| At2g01740 | + | + | + |   |
| At2g01750 | + |   | + |   |
| At2g01760 | + | + | + |   |
| At2g01810 | + |   |   | + |
| At2g01820 | + | + | + |   |
| At2g01830 | + | + | + |   |
| At2g01850 | + | + | + |   |
| At2g01860 | + | + | + |   |
| At2g01870 | + | + | + |   |
| At2g01890 | + | + | + |   |
| At2g01910 | + | + | + |   |
| At2g01930 | + | + | + |   |
| At2g01940 | + | + |   |   |
| At2g01950 | + | + | + |   |
| At2g01960 | + | + |   |   |
| At2g01970 | + | + | + |   |
| At2g01980 | + | + | + |   |
| At2g01990 | + | + | + |   |
| At2g02010 |   | + | + |   |
| At2g02040 | + | + | + |   |
| At2g02050 | + | + | + |   |
| At2g02070 | + | + | + |   |
| At2g02080 | + | + | + |   |
| At2g02090 | + | + | + |   |
| At2g02100 | + | + | + |   |
| At2g02130 | + | + | + |   |
| At2g02140 | + | + | + | + |
| At2g02150 | + | + | + |   |
| At2g02160 | + | + | + |   |
| At2g02170 | + | + | + |   |
| At2g02180 | + | + | + |   |
| At2g02220 | + | + | + |   |
| At2g02230 | + | + | + |   |
| At2g02350 | + |   |   |   |
| At2g02370 | + | + | + |   |
| At2g02390 | + | + | + |   |
| At2g02400 | + | + | + |   |
| At2g02410 | + | + | + |   |
| At2g02420 | + | + | + |   |
| At2g02450 | + | + |   |   |
| At2g02470 | + | + | + |   |
| At2g02480 | + | + |   |   |
| At2g02500 | + | + | + |   |
| At2g02510 | + | + | + |   |
| At2g02515 |   | + | + | + |
| At2g02540 | + |   |   |   |
| At2g02560 | + | + | + |   |
| At2g02570 | + | + | + |   |
| At2g02580 |   | + |   |   |
| At2g02590 | + | + | + |   |
| At2g02710 | + | + | + |   |
| At2g02720 | + | + | + | + |

|           |   |   |   |   |
|-----------|---|---|---|---|
| At2g02730 |   | + | + |   |
| At2g02740 | + | + | + |   |
| At2g02760 | + | + | + |   |
| At2g02770 | + | + | + |   |
| At2g02780 | + | + | + |   |
| At2g02800 | + | + | + |   |
| At2g02810 | + | + | + |   |
| At2g02820 |   |   | + |   |
| At2g02850 | + | + | + |   |
| At2g02860 | + | + | + |   |
| At2g02870 | + | + | + |   |
| At2g02880 | + | + | + |   |
| At2g02930 | + | + | + |   |
| At2g02950 | + |   |   |   |
| At2g02960 | + | + | + |   |
| At2g02970 | + | + | + |   |
| At2g02980 | + | + | + |   |
| At2g02990 | + | + | + |   |
| At2g03010 | + | + | + |   |
| At2g03050 | + | + | + |   |
| At2g03060 | + |   |   | + |
| At2g03070 | + | + | + |   |
| At2g03090 | + | + | + |   |
| At2g03120 | + | + | + |   |
| At2g03140 | + | + | + |   |
| At2g03150 | + | + | + |   |
| At2g03190 |   |   | + | + |
| At2g03200 | + |   | + |   |
| At2g03220 | + | + | + |   |
| At2g03240 | + | + | + |   |
| At2g03270 | + | + | + |   |
| At2g03280 | + | + | + |   |
| At2g03330 | + | + | + |   |
| At2g03340 | + | + | + |   |
| At2g03350 | + | + | + |   |
| At2g03390 | + | + | + |   |
| At2g03400 | + | + | + |   |
| At2g03410 |   | + |   | + |
| At2g03420 | + | + | + |   |
| At2g03430 | + | + | + |   |
| At2g03450 | + | + | + |   |
| At2g03470 | + | + | + |   |
| At2g03480 | + | + | + |   |
| At2g03510 | + | + | + |   |
| At2g03530 |   | + |   |   |
| At2g03550 | + | + | + |   |
| At2g03670 | + | + | + |   |
| At2g03680 | + | + | + |   |
| At2g03690 | + | + | + |   |
| At2g03710 | + | + | + |   |
| At2g03730 | + | + | + |   |
| At2g03740 | + |   |   | + |

|           |   |   |   |   |
|-----------|---|---|---|---|
| At2g03750 | + | + | + |   |
| At2g03780 | + | + | + |   |
| At2g03800 | + | + | + |   |
| At2g03810 | + | + | + |   |
| At2g03820 | + | + | + |   |
| At2g03830 | + |   |   | + |
| At2g03840 | + | + |   |   |
| At2g03850 | + | + |   | + |
| At2g03870 | + | + | + |   |
| At2g03890 | + | + | + |   |
| At2g03980 | + | + | + |   |
| At2g04020 | + |   |   | + |
| At2g04030 | + | + | + |   |
| At2g04032 |   |   | + |   |
| At2g04039 | + | + | + |   |
| At2g04160 | + |   |   |   |
| At2g04230 | + | + | + |   |
| At2g04240 | + | + | + |   |
| At2g04270 | + | + | + |   |
| At2g04280 | + | + | + |   |
| At2g04305 | + | + | + |   |
| At2g04340 | + | + | + |   |
| At2g04350 | + | + | + |   |
| At2g04360 | + | + | + |   |
| At2g04400 | + | + | + |   |
| At2g04410 | + | + | + |   |
| At2g04430 | + |   |   |   |
| At2g04450 |   | + |   |   |
| At2g04460 | + |   |   |   |
| At2g04520 | + | + | + |   |
| At2g04530 | + | + | + |   |
| At2g04540 | + | + | + |   |
| At2g04550 | + | + | + |   |
| At2g04570 | + | + | + |   |
| At2g04620 |   | + |   |   |
| At2g04630 | + | + | + |   |
| At2g04650 | + | + | + |   |
| At2g04660 | + | + | + |   |
| At2g04675 | + |   |   | + |
| At2g04690 | + | + | + |   |
| At2g04700 | + | + | + |   |
| At2g04740 | + | + | + |   |
| At2g04750 | + | + | + |   |
| At2g04780 | + | + | + |   |
| At2g04790 | + | + | + |   |
| At2g04795 | + | + |   |   |
| At2g04800 |   |   | + |   |
| At2g04845 | + | + | + |   |
| At2g04850 | + | + | + |   |
| At2g04880 | + | + | + |   |
| At2g04900 | + | + | + |   |
| At2g04920 |   | + |   |   |

|           |   |   |   |   |
|-----------|---|---|---|---|
| At2g04940 | + | + | + |   |
| At2g05070 | + | + | + |   |
| At2g05120 | + | + | + |   |
| At2g05160 | + |   |   |   |
| At2g05170 | + | + | + |   |
| At2g05210 | + | + | + |   |
| At2g05250 | + | + | + |   |
| At2g05260 | + | + | + |   |
| At2g05310 | + | + | + |   |
| At2g05320 | + | + | + |   |
| At2g05390 |   |   | + |   |
| At2g05520 | + | + | + |   |
| At2g05540 | + | + | + |   |
| At2g05590 | + | + | + |   |
| At2g05620 | + | + | + |   |
| At2g05630 | + | + | + |   |
| At2g05710 | + | + | + |   |
| At2g05755 | + | + | + |   |
| At2g05760 | + | + | + |   |
| At2g05790 | + | + | + |   |
| At2g05810 | + | + | + |   |
| At2g05830 | + | + | + |   |
| At2g05840 | + | + | + |   |
| At2g05850 |   | + | + | + |
| At2g05910 |   | + | + |   |
| At2g05920 | + | + | + |   |
| At2g05940 | + | + | + |   |
| At2g05990 | + | + | + |   |
| At2g06000 | + | + | + |   |
| At2g06010 | + | + | + |   |
| At2g06030 | + | + | + |   |
| At2g06050 | + |   |   |   |
| At2g06090 |   | + | + |   |
| At2g06210 | + | + | + |   |
| At2g06255 | + | + |   |   |
| At2g06510 | + | + | + |   |
| At2g06520 | + | + | + |   |
| At2g06530 | + | + | + |   |
| At2g06850 | + | + | + |   |
| At2g06925 | + | + | + |   |
| At2g06990 | + | + | + |   |
| At2g07040 | + | + | + | + |
| At2g07050 | + | + | + |   |
| At2g07170 | + | + | + |   |
| At2g07180 | + | + | + |   |
| At2g07190 |   |   | + |   |
| At2g07340 | + | + | + |   |
| At2g07340 | + | + | + |   |
| At2g07360 | + | + | + |   |
| At2g07370 | + | + | + |   |
| At2g07560 | + | + |   | + |
| At2g07680 | + | + | + |   |

|           |   |   |   |   |
|-----------|---|---|---|---|
| At2g07690 | + | + | + |   |
| At2g07705 | + |   |   |   |
| At2g07750 | + | + | + |   |
| At2g09990 | + | + | + |   |
| At2g10640 | + |   | + |   |
| At2g10930 | + |   |   |   |
| At2g10940 | + | + | + |   |
| At2g10950 | + | + | + |   |
| At2g10970 | + | + |   | + |
| At2g11000 | + | + | + |   |
| At2g11060 | + | + |   | + |
| At2g11480 | + |   |   | + |
| At2g11520 | + | + | + |   |
| At2g11810 | + | + | + |   |
| At2g11890 | + | + | + |   |
| At2g11910 | + | + | + |   |
| At2g12190 | + |   |   |   |
| At2g12290 | + | + | + |   |
| At2g12400 | + | + | + |   |
| At2g12480 | + | + | + |   |
| At2g12550 | + | + | + |   |
| At2g13100 | + | + | + |   |
| At2g13350 | + | + | + | + |
| At2g13360 | + | + | + |   |
| At2g13370 | + | + | + |   |
| At2g13440 | + | + | + |   |
| At2g13540 | + | + | + |   |
| At2g13560 | + | + | + |   |
| At2g13570 | + | + | + | + |
| At2g13610 | + | + | + |   |
| At2g13650 | + | + | + |   |
| At2g13675 | + | + | + | + |
| At2g13690 | + | + | + |   |
| At2g13790 | + | + | + |   |
| At2g13820 | + | + | + |   |
| At2g13840 | + | + | + |   |
| At2g13940 | + | + | + |   |
| At2g13960 |   |   | + |   |
| At2g14050 | + | + | + |   |
| At2g14095 |   | + | + |   |
| At2g14110 | + | + | + |   |
| At2g14120 | + | + | + |   |
| At2g14170 | + | + | + |   |
| At2g14210 |   | + |   |   |
| At2g14260 | + | + | + |   |
| At2g14460 | + | + | + |   |
| At2g14490 | + | + |   | + |
| At2g14520 | + | + | + |   |
| At2g14530 | + |   | + |   |
| At2g14560 |   | + |   |   |
| At2g14610 |   | + |   |   |
| At2g14680 | + | + | + |   |

|           |   |   |   |   |
|-----------|---|---|---|---|
| At2g14740 | + | + | + |   |
| At2g14750 | + | + | + |   |
| At2g14800 | + | + | + |   |
| At2g14835 | + | + | + |   |
| At2g14850 | + | + | + |   |
| At2g14860 | + | + | + |   |
| At2g14880 | + | + | + |   |
| At2g14890 | + | + | + |   |
| At2g14900 | + | + | + |   |
| At2g14910 | + | + | + |   |
| At2g15000 | + | + | + |   |
| At2g15050 | + | + | + |   |
| At2g15090 | + | + | + |   |
| At2g15230 | + | + | + |   |
| At2g15240 | + | + | + |   |
| At2g15270 | + | + | + |   |
| At2g15280 | + | + | + |   |
| At2g15290 | + | + | + |   |
| At2g15310 | + | + | + |   |
| At2g15320 | + | + | + |   |
| At2g15380 |   |   | + |   |
| At2g15390 |   | + |   |   |
| At2g15400 | + | + | + |   |
| At2g15440 | + | + | + |   |
| At2g15530 | + | + | + |   |
| At2g15535 | + |   |   | + |
| At2g15560 | + |   |   |   |
| At2g15570 | + | + | + |   |
| At2g15580 | + | + | + |   |
| At2g15620 | + | + | + |   |
| At2g15650 | + | + |   | + |
| At2g15690 | + | + | + |   |
| At2g15695 | + | + | + |   |
| At2g15740 |   |   | + |   |
| At2g15790 | + | + | + |   |
| At2g15820 |   | + | + |   |
| At2g15830 |   | + |   |   |
| At2g15860 | + | + | + |   |
| At2g15880 | + | + | + |   |
| At2g15890 | + |   |   |   |
| At2g15900 | + | + | + |   |
| At2g15960 | + | + | + |   |
| At2g15970 | + | + | + |   |
| At2g16000 |   |   | + |   |
| At2g16060 | + | + | + |   |
| At2g16070 | + | + | + |   |
| At2g16090 | + | + | + |   |
| At2g16110 |   | + |   |   |
| At2g16120 | + |   |   | + |
| At2g16210 | + |   |   | + |
| At2g16250 | + |   | + |   |
| At2g16260 | + |   |   |   |

|           |   |   |   |   |
|-----------|---|---|---|---|
| At2g16270 | + | + | + |   |
| At2g16280 | + | + | + |   |
| At2g16350 | + | + | + |   |
| At2g16360 | + |   |   |   |
| At2g16370 | + | + | + |   |
| At2g16400 | + | + | + |   |
| At2g16430 | + | + | + |   |
| At2g16440 | + | + | + |   |
| At2g16450 | + |   |   | + |
| At2g16460 | + | + | + |   |
| At2g16480 | + | + | + |   |
| At2g16500 | + | + | + |   |
| At2g16510 | + | + | + |   |
| At2g16530 |   | + | + |   |
| At2g16570 | + | + | + |   |
| At2g16580 | + | + | + |   |
| At2g16590 | + |   | + |   |
| At2g16595 | + | + | + |   |
| At2g16600 | + | + | + |   |
| At2g16630 | + | + | + |   |
| At2g16640 | + | + | + |   |
| At2g16650 | + | + | + |   |
| At2g16660 | + | + | + |   |
| At2g16700 | + | + | + |   |
| At2g16710 | + | + | + |   |
| At2g16720 | + | + | + |   |
| At2g16730 | + | + |   | + |
| At2g16740 | + | + | + |   |
| At2g16750 | + |   |   |   |
| At2g16760 | + |   |   |   |
| At2g16780 | + | + | + |   |
| At2g16790 |   | + |   |   |
| At2g16800 | + | + | + |   |
| At2g16850 | + | + | + |   |
| At2g16860 | + | + | + |   |
| At2g16880 | + | + | + |   |
| At2g16890 | + | + | + |   |
| At2g16900 | + | + | + |   |
| At2g16920 | + | + | + |   |
| At2g16930 | + | + | + |   |
| At2g16940 | + | + | + |   |
| At2g16950 | + | + | + |   |
| At2g16970 | + | + | + |   |
| At2g16990 | + | + | + |   |
| At2g17000 |   | + |   | + |
| At2g17020 | + | + | + |   |
| At2g17030 | + | + | + |   |
| At2g17033 | + | + | + |   |
| At2g17040 | + | + |   |   |
| At2g17110 | + | + | + |   |
| At2g17120 | + | + | + |   |
| At2g17130 | + | + | + |   |



|           |   |   |   |
|-----------|---|---|---|
| At2g17150 | + | + | + |
| At2g17170 | + |   |   |
| At2g17200 | + | + | + |
| At2g17220 | + | + | + |
| At2g17230 | + | + | + |
| At2g17240 | + | + | + |
| At2g17250 | + | + | + |
| At2g17265 | + | + | + |
| At2g17270 | + | + | + |
| At2g17280 | + | + | + |
| At2g17290 | + | + | + |
| At2g17300 | + | + | + |
| At2g17340 | + | + | + |
| At2g17350 | + | + | + |
| At2g17360 | + | + | + |
| At2g17370 | + | + | + |
| At2g17380 | + | + | + |
| At2g17390 | + | + | + |
| At2g17400 | + |   |   |
| At2g17410 | + | + | + |
| At2g17420 | + | + | + |
| At2g17440 | + | + | + |
| At2g17450 | + |   |   |
| At2g17480 | + | + | + |
| At2g17500 | + | + | + |
| At2g17510 | + | + | + |
| At2g17520 | + | + | + |
| At2g17530 | + | + | + |
| At2g17540 |   |   | + |
| At2g17550 | + | + | + |
| At2g17560 | + | + | + |
| At2g17570 | + | + | + |
| At2g17580 |   |   | + |
| At2g17620 | + |   |   |
| At2g17630 | + | + | + |
| At2g17640 | + | + | + |
| At2g17670 | + | + | + |
| At2g17700 | + | + | + |
| At2g17710 | + | + | + |
| At2g17720 | + | + | + |
| At2g17730 | + | + | + |
| At2g17760 | + | + | + |
| At2g17790 | + | + | + |
| At2g17800 | + | + | + |
| At2g17820 | + | + |   |
| At2g17830 |   |   | + |
| At2g17840 | + | + | + |
| At2g17845 |   | + | + |
| At2g17870 | + | + | + |
| At2g17880 | + | + |   |
| At2g17890 | + | + | + |
| At2g17930 | + | + | + |

|           |   |   |   |   |
|-----------|---|---|---|---|
| At2g17950 | + |   |   | + |
| At2g17970 | + | + | + |   |
| At2g17972 | + | + | + |   |
| At2g17975 | + | + | + |   |
| At2g17980 | + | + | + |   |
| At2g17990 | + | + | + |   |
| At2g18010 |   | + |   |   |
| At2g18020 | + | + | + |   |
| At2g18030 | + | + | + |   |
| At2g18040 | + | + | + |   |
| At2g18050 | + |   | + |   |
| At2g18090 | + | + | + |   |
| At2g18100 | + |   |   |   |
| At2g18110 | + | + | + |   |
| At2g18115 | + |   |   | + |
| At2g18160 | + | + | + |   |
| At2g18170 | + | + | + |   |
| At2g18180 | + | + | + |   |
| At2g18220 | + | + | + |   |
| At2g18230 | + | + | + |   |
| At2g18240 | + | + | + |   |
| At2g18245 | + | + | + |   |
| At2g18250 | + | + | + |   |
| At2g18260 | + |   |   | + |
| At2g18280 | + | + | + |   |
| At2g18290 | + | + | + |   |
| At2g18330 | + | + | + |   |
| At2g18340 | + |   |   | + |
| At2g18350 |   | + |   |   |
| At2g18380 | + |   | + |   |
| At2g18390 | + | + | + |   |
| At2g18400 | + | + | + |   |
| At2g18410 | + | + | + |   |
| At2g18420 | + | + | + | + |
| At2g18440 | + | + | + |   |
| At2g18470 | + | + | + | + |
| At2g18480 | + |   |   |   |
| At2g18510 | + | + | + |   |
| At2g18520 | + | + | + |   |
| At2g18550 | + | + | + |   |
| At2g18570 | + | + |   |   |
| At2g18600 | + | + | + |   |
| At2g18630 | + | + | + |   |
| At2g18660 | + | + | + |   |
| At2g18700 | + | + | + |   |
| At2g18710 | + | + | + |   |
| At2g18730 | + | + | + |   |
| At2g18740 | + | + | + |   |
| At2g18750 | + | + | + |   |
| At2g18760 | + | + | + |   |
| At2g18770 | + | + | + |   |
| At2g18780 | + | + | + |   |

|           |   |   |   |   |
|-----------|---|---|---|---|
| At2g18790 | + | + | + |   |
| At2g18820 |   |   | + |   |
| At2g18840 | + | + | + |   |
| At2g18850 | + | + | + |   |
| At2g18890 | + | + | + |   |
| At2g18900 | + | + | + |   |
| At2g18910 | + | + | + |   |
| At2g18915 | + | + | + |   |
| At2g18940 | + | + | + |   |
| At2g18950 | + | + | + |   |
| At2g18960 | + | + | + |   |
| At2g18980 |   |   | + |   |
| At2g18990 | + | + | + |   |
| At2g19000 | + | + |   | + |
| At2g19010 | + |   |   | + |
| At2g19040 |   | + | + | + |
| At2g19050 |   | + |   |   |
| At2g19070 | + |   |   | + |
| At2g19080 | + | + | + |   |
| At2g19110 | + | + |   |   |
| At2g19120 | + | + | + |   |
| At2g19130 |   | + | + |   |
| At2g19170 | + | + | + |   |
| At2g19180 | + | + | + |   |
| At2g19270 | + | + | + |   |
| At2g19280 | + | + | + |   |
| At2g19310 | + | + | + |   |
| At2g19340 | + | + | + |   |
| At2g19340 | + | + | + |   |
| At2g19350 | + | + | + |   |
| At2g19380 |   | + | + |   |
| At2g19385 | + | + | + |   |
| At2g19390 | + | + | + |   |
| At2g19400 | + | + |   | + |
| At2g19430 | + | + | + |   |
| At2g19440 | + | + | + |   |
| At2g19450 | + | + | + |   |
| At2g19460 | + | + | + |   |
| At2g19470 | + | + | + |   |
| At2g19480 | + | + | + |   |
| At2g19500 | + |   |   | + |
| At2g19520 | + | + | + |   |
| At2g19540 | + | + | + |   |
| At2g19560 | + | + | + |   |
| At2g19570 | + | + | + |   |
| At2g19580 | + | + | + |   |
| At2g19600 | + | + | + |   |
| At2g19620 | + | + | + |   |
| At2g19650 | + | + | + |   |
| At2g19670 | + | + | + |   |
| At2g19680 | + | + | + |   |
| At2g19710 | + | + | + |   |

|           |   |   |   |   |
|-----------|---|---|---|---|
| At2g19720 | + | + | + |   |
| At2g19730 | + | + | + |   |
| At2g19740 | + | + | + |   |
| At2g19750 | + | + | + |   |
| At2g19760 | + | + | + |   |
| At2g19770 | + | + |   | + |
| At2g19780 | + | + | + |   |
| At2g19790 | + | + | + |   |
| At2g19800 | + | + | + |   |
| At2g19810 | + | + | + |   |
| At2g19830 | + | + | + |   |
| At2g19860 | + | + | + |   |
| At2g19880 | + | + | + |   |
| At2g19930 | + | + |   |   |
| At2g19940 | + | + | + |   |
| At2g19950 | + | + | + |   |
| At2g19980 |   | + |   | + |
| At2g20000 | + | + | + |   |
| At2g20010 | + | + | + |   |
| At2g20020 | + | + | + |   |
| At2g20040 | + | + | + |   |
| At2g20050 | + |   |   |   |
| At2g20060 | + | + | + |   |
| At2g20100 | + | + | + |   |
| At2g20110 | + | + | + |   |
| At2g20130 | + | + | + |   |
| At2g20140 | + | + | + |   |
| At2g20160 |   |   | + | + |
| At2g20180 | + |   | + |   |
| At2g20190 | + | + | + |   |
| At2g20230 | + | + | + |   |
| At2g20240 | + | + | + |   |
| At2g20260 | + | + | + |   |
| At2g20270 | + | + | + |   |
| At2g20280 | + | + | + |   |
| At2g20290 | + | + | + |   |
| At2g20300 | + |   |   |   |
| At2g20310 | + | + | + |   |
| At2g20320 | + | + |   |   |
| At2g20330 | + | + | + |   |
| At2g20340 | + | + | + |   |
| At2g20360 | + | + | + |   |
| At2g20370 | + | + | + |   |
| At2g20390 | + | + | + |   |
| At2g20400 | + | + | + |   |
| At2g20410 | + | + | + |   |
| At2g20420 | + | + | + |   |
| At2g20430 | + |   |   |   |
| At2g20450 | + | + | + |   |
| At2g20480 | + |   |   | + |
| At2g20490 | + | + | + |   |
| At2g20500 | + | + | + |   |

|           |   |   |   |   |
|-----------|---|---|---|---|
| At2g20515 | + | + | + |   |
| At2g20550 | + |   |   |   |
| At2g20580 | + | + | + |   |
| At2g20585 | + | + | + |   |
| At2g20595 |   | + |   | + |
| At2g20610 | + | + | + |   |
| At2g20620 | + |   |   | + |
| At2g20630 | + | + | + |   |
| At2g20650 | + | + | + |   |
| At2g20670 | + | + |   |   |
| At2g20680 | + | + | + |   |
| At2g20690 | + | + | + |   |
| At2g20700 | + | + | + | + |
| At2g20710 | + | + | + |   |
| At2g20720 | + |   | + | + |
| At2g20725 | + | + | + |   |
| At2g20730 | + | + | + |   |
| At2g20740 | + | + | + |   |
| At2g20750 | + |   |   |   |
| At2g20760 | + | + | + |   |
| At2g20780 | + |   |   |   |
| At2g20790 | + | + | + |   |
| At2g20810 | + | + | + |   |
| At2g20820 | + | + | + |   |
| At2g20830 | + | + | + |   |
| At2g20840 | + | + | + |   |
| At2g20850 | + | + | + |   |
| At2g20860 | + | + | + |   |
| At2g20870 | + | + | + |   |
| At2g20890 | + | + | + |   |
| At2g20900 | + | + | + |   |
| At2g20920 | + | + | + |   |
| At2g20930 | + | + | + |   |
| At2g20940 | + | + | + |   |
| At2g20960 | + | + | + |   |
| At2g20980 | + |   | + |   |
| At2g20990 | + | + | + |   |
| At2g21030 | + | + | + | + |
| At2g21050 | + | + | + |   |
| At2g21060 | + | + | + |   |
| At2g21070 | + | + | + |   |
| At2g21120 | + | + | + |   |
| At2g21130 | + | + | + |   |
| At2g21140 | + |   | + |   |
| At2g21150 | + | + | + |   |
| At2g21160 | + | + | + |   |
| At2g21170 | + | + | + |   |
| At2g21180 | + | + | + |   |
| At2g21185 |   | + | + |   |
| At2g21190 | + | + | + |   |
| At2g21195 | + | + | + |   |
| At2g21200 | + |   | + |   |

|           |   |   |   |   |
|-----------|---|---|---|---|
| At2g21210 | + | + | + |   |
| At2g21220 | + |   | + | + |
| At2g21230 | + | + | + |   |
| At2g21240 | + | + | + |   |
| At2g21260 | + | + | + |   |
| At2g21270 | + | + | + |   |
| At2g21280 | + | + | + |   |
| At2g21290 | + | + | + |   |
| At2g21300 | + | + | + |   |
| At2g21320 | + | + | + |   |
| At2g21330 | + | + | + |   |
| At2g21340 | + | + | + |   |
| At2g21380 | + | + | + |   |
| At2g21385 | + | + | + |   |
| At2g21390 | + | + | + |   |
| At2g21410 | + | + | + |   |
| At2g21430 | + | + | + |   |
| At2g21440 | + | + | + |   |
| At2g21450 | + | + | + |   |
| At2g21470 | + | + | + |   |
| At2g21480 | + | + |   |   |
| At2g21490 | + |   |   | + |
| At2g21510 | + | + | + | + |
| At2g21520 | + | + | + |   |
| At2g21530 | + | + | + |   |
| At2g21540 | + | + | + |   |
| At2g21560 | + | + | + |   |
| At2g21580 | + | + | + |   |
| At2g21590 | + | + | + |   |
| At2g21600 | + | + | + |   |
| At2g21620 | + | + | + |   |
| At2g21630 | + | + | + |   |
| At2g21640 | + |   |   |   |
| At2g21650 | + | + |   |   |
| At2g21655 |   | + |   | + |
| At2g21660 | + | + | + |   |
| At2g21710 |   | + | + |   |
| At2g21770 | + |   | + |   |
| At2g21780 | + | + |   |   |
| At2g21790 | + | + | + |   |
| At2g21800 | + | + | + |   |
| At2g21830 | + | + | + |   |
| At2g21860 | + |   | + |   |
| At2g21870 | + | + | + |   |
| At2g21880 | + | + | + |   |
| At2g21890 | + |   |   |   |
| At2g21940 | + | + |   |   |
| At2g21950 | + | + | + |   |
| At2g21960 | + | + | + |   |
| At2g21970 | + | + | + |   |
| At2g21990 | + | + | + | + |
| At2g22010 | + | + | + |   |

|           |   |   |   |   |
|-----------|---|---|---|---|
| At2g22030 | + |   |   |   |
| At2g22040 | + | + | + |   |
| At2g22080 | + | + | + |   |
| At2g22090 | + | + | + |   |
| At2g22100 | + | + | + |   |
| At2g22120 | + | + | + |   |
| At2g22125 | + | + | + |   |
| At2g22170 | + | + | + |   |
| At2g22180 | + | + | + |   |
| At2g22190 | + |   | + |   |
| At2g22230 | + | + | + |   |
| At2g22240 | + | + | + |   |
| At2g22250 | + | + | + |   |
| At2g22260 | + | + | + |   |
| At2g22270 | + | + | + |   |
| At2g22300 | + | + | + |   |
| At2g22310 | + | + | + |   |
| At2g22360 | + | + | + |   |
| At2g22370 | + | + | + |   |
| At2g22390 | + | + | + |   |
| At2g22400 | + | + | + |   |
| At2g22420 | + | + | + |   |
| At2g22425 | + | + | + |   |
| At2g22430 | + | + | + |   |
| At2g22450 | + | + | + |   |
| At2g22470 |   | + |   |   |
| At2g22475 | + | + | + |   |
| At2g22480 | + | + | + |   |
| At2g22490 | + | + | + |   |
| At2g22500 | + | + | + |   |
| At2g22510 | + |   |   |   |
| At2g22530 | + | + | + |   |
| At2g22550 |   | + | + |   |
| At2g22560 | + | + | + |   |
| At2g22570 | + | + | + |   |
| At2g22610 | + | + | + |   |
| At2g22620 | + | + | + |   |
| At2g22640 | + | + | + |   |
| At2g22650 | + | + | + | + |
| At2g22660 | + | + | + |   |
| At2g22670 | + | + | + |   |
| At2g22680 | + | + | + |   |
| At2g22690 | + | + | + |   |
| At2g22720 | + | + | + |   |
| At2g22740 | + | + | + |   |
| At2g22780 | + | + | + |   |
| At2g22800 | + | + | + |   |
| At2g22830 | + | + | + |   |
| At2g22840 | + | + | + |   |
| At2g22850 | + |   |   |   |
| At2g22860 | + | + | + |   |
| At2g22870 | + | + | + |   |

|           |   |   |   |   |
|-----------|---|---|---|---|
| At2g22890 | + | + | + |   |
| At2g22900 | + | + | + |   |
| At2g22910 | + | + | + |   |
| At2g22950 | + |   |   | + |
| At2g22960 | + |   |   | + |
| At2g22970 | + | + | + |   |
| At2g22980 | + | + | + |   |
| At2g22990 | + | + | + |   |
| At2g23000 | + | + | + |   |
| At2g23060 | + |   |   | + |
| At2g23070 | + | + | + |   |
| At2g23080 | + | + | + |   |
| At2g23090 | + | + | + |   |
| At2g23100 |   | + |   |   |
| At2g23120 | + | + | + |   |
| At2g23130 |   |   | + |   |
| At2g23140 | + | + | + |   |
| At2g23150 | + | + | + |   |
| At2g23170 | + | + | + |   |
| At2g23180 | + | + | + |   |
| At2g23200 | + |   |   |   |
| At2g23290 | + | + | + |   |
| At2g23300 | + | + | + |   |
| At2g23310 | + | + | + |   |
| At2g23320 | + | + | + |   |
| At2g23340 | + |   | + |   |
| At2g23350 | + | + | + |   |
| At2g23360 | + | + | + |   |
| At2g23380 | + | + | + | + |
| At2g23390 | + | + | + |   |
| At2g23420 | + | + | + |   |
| At2g23430 | + | + | + |   |
| At2g23450 | + | + | + |   |
| At2g23460 | + | + | + |   |
| At2g23510 | + |   |   | + |
| At2g23550 |   |   | + | + |
| At2g23590 | + | + | + |   |
| At2g23610 | + | + | + |   |
| At2g23620 |   | + |   |   |
| At2g23660 | + |   |   |   |
| At2g23670 | + | + | + |   |
| At2g23700 | + | + | + | + |
| At2g23740 | + | + | + |   |
| At2g23750 | + | + | + |   |
| At2g23760 | + | + | + |   |
| At2g23780 | + | + | + |   |
| At2g23800 | + |   |   | + |
| At2g23810 | + | + | + |   |
| At2g23840 | + | + | + |   |
| At2g23890 | + | + | + |   |
| At2g23900 | + | + | + | + |
| At2g23910 | + |   | + |   |



|           |   |   |   |   |
|-----------|---|---|---|---|
| At2g23930 | + | + | + |   |
| At2g23940 | + | + | + |   |
| At2g23945 | + | + | + |   |
| At2g23950 | + |   |   |   |
| At2g23970 | + | + | + | + |
| At2g23980 | + | + | + |   |
| At2g23990 |   | + | + | + |
| At2g24020 | + | + | + |   |
| At2g24040 | + | + | + |   |
| At2g24050 | + | + | + |   |
| At2g24060 | + | + | + |   |
| At2g24090 | + | + | + |   |
| At2g24100 | + | + | + |   |
| At2g24120 | + | + | + |   |
| At2g24130 |   | + |   |   |
| At2g24150 | + | + | + |   |
| At2g24160 |   | + |   |   |
| At2g24170 | + | + | + |   |
| At2g24180 | + | + | + |   |
| At2g24190 | + | + | + |   |
| At2g24200 | + | + | + |   |
| At2g24210 | + | + |   | + |
| At2g24220 | + | + | + |   |
| At2g24230 | + | + | + |   |
| At2g24240 | + |   |   |   |
| At2g24250 | + | + |   | + |
| At2g24260 |   | + |   |   |
| At2g24270 | + | + | + |   |
| At2g24280 | + | + | + |   |
| At2g24290 | + | + | + |   |
| At2g24320 | + | + | + |   |
| At2g24330 | + | + | + |   |
| At2g24360 | + | + | + |   |
| At2g24370 | + | + | + | + |
| At2g24420 | + | + | + |   |
| At2g24440 | + | + | + |   |
| At2g24450 | + | + | + | + |
| At2g24490 | + | + | + |   |
| At2g24500 | + | + | + |   |
| At2g24520 | + | + | + |   |
| At2g24530 | + | + | + |   |
| At2g24550 | + | + |   |   |
| At2g24570 | + | + | + |   |
| At2g24580 | + | + | + |   |
| At2g24590 | + | + | + |   |
| At2g24600 | + | + |   |   |
| At2g24630 | + | + | + |   |
| At2g24640 | + | + | + |   |
| At2g24650 | + |   | + |   |
| At2g24762 |   |   | + |   |
| At2g24765 | + | + | + |   |
| At2g24790 | + | + | + |   |

|           |   |   |   |   |
|-----------|---|---|---|---|
| At2g24800 | + |   | + |   |
| At2g24820 | + | + | + |   |
| At2g24830 | + | + | + |   |
| At2g24850 |   | + |   |   |
| At2g24860 | + | + | + |   |
| At2g24940 | + | + | + |   |
| At2g24970 | + | + | + |   |
| At2g25000 |   | + | + |   |
| At2g25010 | + | + | + |   |
| At2g25060 | + | + | + |   |
| At2g25070 | + | + | + |   |
| At2g25080 | + | + | + |   |
| At2g25100 | + | + | + |   |
| At2g25110 | + | + | + |   |
| At2g25140 | + | + | + |   |
| At2g25170 | + | + | + |   |
| At2g25180 | + | + | + |   |
| At2g25190 | + | + | + |   |
| At2g25210 | + | + | + |   |
| At2g25250 | + | + | + |   |
| At2g25270 | + | + | + |   |
| At2g25280 | + | + | + |   |
| At2g25300 | + | + | + |   |
| At2g25310 | + | + | + |   |
| At2g25330 | + |   | + |   |
| At2g25355 | + | + | + |   |
| At2g25420 | + | + | + | + |
| At2g25430 | + | + | + |   |
| At2g25450 |   | + | + |   |
| At2g25490 | + | + | + |   |
| At2g25520 | + | + | + |   |
| At2g25530 | + | + | + |   |
| At2g25540 |   | + | + |   |
| At2g25560 | + | + | + |   |
| At2g25570 | + | + | + |   |
| At2g25580 | + | + | + |   |
| At2g25590 | + | + | + |   |
| At2g25600 | + | + |   | + |
| At2g25610 | + | + | + |   |
| At2g25620 | + | + | + |   |
| At2g25625 |   | + | + |   |
| At2g25630 | + | + |   |   |
| At2g25640 | + |   | + | + |
| At2g25660 | + | + | + |   |
| At2g25670 | + | + | + |   |
| At2g25690 | + | + | + |   |
| At2g25700 | + | + | + | + |
| At2g25710 | + | + | + |   |
| At2g25720 | + | + | + |   |
| At2g25730 | + | + | + |   |
| At2g25740 | + | + | + |   |
| At2g25750 | + | + | + |   |

|           |   |   |   |   |
|-----------|---|---|---|---|
| At2g25760 | + | + | + |   |
| At2g25790 | + | + | + |   |
| At2g25800 | + | + | + |   |
| At2g25810 | + | + |   |   |
| At2g25830 | + | + | + |   |
| At2g25840 | + | + | + |   |
| At2g25850 | + | + | + |   |
| At2g25860 | + | + | + |   |
| At2g25870 | + | + | + |   |
| At2g25880 | + | + | + |   |
| At2g25890 | + |   |   | + |
| At2g25900 | + | + | + |   |
| At2g25910 | + | + | + |   |
| At2g25920 | + | + | + |   |
| At2g25930 | + | + | + |   |
| At2g25940 |   | + |   |   |
| At2g25950 | + | + | + |   |
| At2g25970 | + | + | + |   |
| At2g26000 | + |   |   |   |
| At2g26040 |   | + |   |   |
| At2g26060 | + | + | + |   |
| At2g26070 | + | + | + |   |
| At2g26080 | + | + | + |   |
| At2g26110 | + | + | + |   |
| At2g26130 | + | + |   |   |
| At2g26140 | + | + | + |   |
| At2g26170 | + | + | + |   |
| At2g26180 | + | + | + |   |
| At2g26190 | + | + | + |   |
| At2g26200 | + | + | + |   |
| At2g26210 | + | + | + |   |
| At2g26230 | + | + | + |   |
| At2g26240 | + | + | + |   |
| At2g26250 | + | + | + |   |
| At2g26260 | + |   | + |   |
| At2g26280 | + | + | + |   |
| At2g26300 | + | + | + |   |
| At2g26320 |   |   | + | + |
| At2g26330 | + | + | + |   |
| At2g26340 | + | + | + |   |
| At2g26350 | + | + |   |   |
| At2g26360 | + | + | + |   |
| At2g26400 | + | + |   |   |
| At2g26410 | + | + | + |   |
| At2g26430 | + | + | + |   |
| At2g26440 | + | + | + |   |
| At2g26450 | + | + | + | + |
| At2g26460 | + | + | + |   |
| At2g26490 | + | + |   | + |
| At2g26500 | + | + | + |   |
| At2g26510 | + | + | + |   |
| At2g26530 |   | + | + |   |

|           |   |   |   |   |
|-----------|---|---|---|---|
| At2g26540 | + | + | + |   |
| At2g26550 | + | + | + |   |
| At2g26570 | + | + | + |   |
| At2g26580 | + | + |   |   |
| At2g26590 | + | + | + |   |
| At2g26600 | + | + | + |   |
| At2g26630 | + |   |   |   |
| At2g26640 | + | + | + |   |
| At2g26660 | + | + | + |   |
| At2g26670 | + | + | + |   |
| At2g26680 | + | + | + |   |
| At2g26690 | + | + | + |   |
| At2g26710 | + | + | + |   |
| At2g26730 | + | + | + |   |
| At2g26740 | + | + | + |   |
| At2g26760 |   |   | + |   |
| At2g26770 | + | + | + |   |
| At2g26780 | + | + | + |   |
| At2g26800 | + | + | + |   |
| At2g26810 | + | + | + |   |
| At2g26830 | + | + | + |   |
| At2g26850 | + | + | + |   |
| At2g26870 | + | + | + |   |
| At2g26890 | + | + | + |   |
| At2g26900 | + | + | + |   |
| At2g26910 | + | + | + |   |
| At2g26920 | + | + | + |   |
| At2g26930 | + | + | + |   |
| At2g26970 | + | + | + |   |
| At2g26980 | + | + |   |   |
| At2g26990 | + | + | + |   |
| At2g27020 | + | + | + |   |
| At2g27030 | + | + | + |   |
| At2g27040 | + | + | + |   |
| At2g27050 | + | + | + |   |
| At2g27060 | + | + | + |   |
| At2g27080 | + | + | + |   |
| At2g27090 | + | + | + |   |
| At2g27100 | + | + | + |   |
| At2g27110 | + | + | + |   |
| At2g27130 | + | + | + |   |
| At2g27140 | + | + | + |   |
| At2g27150 | + | + | + |   |
| At2g27170 | + | + | + |   |
| At2g27180 | + | + | + | + |
| At2g27190 | + | + | + |   |
| At2g27200 | + | + | + |   |
| At2g27230 | + | + | + |   |
| At2g27240 | + | + | + | + |
| At2g27260 | + | + | + |   |
| At2g27285 | + | + | + |   |
| At2g27290 | + | + | + |   |

|           |   |   |   |   |
|-----------|---|---|---|---|
| At2g27310 |   | + |   |   |
| At2g27320 | + |   | + |   |
| At2g27330 | + | + | + |   |
| At2g27340 | + | + | + |   |
| At2g27350 | + | + | + |   |
| At2g27420 | + | + |   |   |
| At2g27450 | + | + | + |   |
| At2g27460 | + | + | + |   |
| At2g27470 | + | + | + |   |
| At2g27490 | + | + | + |   |
| At2g27500 | + | + | + |   |
| At2g27510 | + | + | + |   |
| At2g27530 | + | + | + |   |
| At2g27580 | + |   | + |   |
| At2g27590 | + | + | + |   |
| At2g27600 | + | + | + |   |
| At2g27650 | + | + |   |   |
| At2g27680 | + | + | + |   |
| At2g27700 |   |   | + | + |
| At2g27710 | + | + | + |   |
| At2g27720 | + | + | + |   |
| At2g27730 | + | + | + |   |
| At2g27740 | + | + | + |   |
| At2g27760 | + | + | + |   |
| At2g27775 | + | + | + |   |
| At2g27790 | + | + |   |   |
| At2g27800 | + | + | + |   |
| At2g27810 | + | + | + |   |
| At2g27820 | + | + | + |   |
| At2g27830 | + | + | + |   |
| At2g27840 | + | + | + |   |
| At2g27860 | + | + | + |   |
| At2g27880 | + | + | + | + |
| At2g27900 | + | + | + |   |
| At2g27910 | + | + | + |   |
| At2g27920 | + | + | + |   |
| At2g27950 | + | + | + |   |
| At2g27960 | + | + | + |   |
| At2g27970 | + | + | + |   |
| At2g27980 | + | + | + |   |
| At2g27990 | + | + | + |   |
| At2g28000 | + | + | + |   |
| At2g28050 | + | + | + |   |
| At2g28060 | + | + | + |   |
| At2g28070 | + | + | + |   |
| At2g28080 | + | + | + |   |
| At2g28100 | + |   | + |   |
| At2g28110 | + | + | + |   |
| At2g28120 | + |   |   |   |
| At2g28130 | + | + | + |   |
| At2g28180 | + | + | + | + |
| At2g28190 | + | + | + |   |

|           |   |   |   |   |
|-----------|---|---|---|---|
| At2g28200 | + | + | + |   |
| At2g28230 | + | + | + |   |
| At2g28260 | + | + | + |   |
| At2g28290 | + | + | + |   |
| At2g28305 | + | + | + |   |
| At2g28310 | + | + | + |   |
| At2g28320 | + | + | + |   |
| At2g28330 | + | + | + |   |
| At2g28350 | + | + | + |   |
| At2g28355 | + |   |   | + |
| At2g28360 | + | + | + |   |
| At2g28370 | + | + | + |   |
| At2g28380 | + | + | + |   |
| At2g28390 | + | + | + |   |
| At2g28400 | + | + | + |   |
| At2g28410 | + | + | + |   |
| At2g28420 | + |   |   |   |
| At2g28430 | + | + | + |   |
| At2g28450 | + | + | + |   |
| At2g28470 | + | + | + |   |
| At2g28510 | + | + | + |   |
| At2g28520 | + | + | + |   |
| At2g28530 | + | + | + |   |
| At2g28540 | + | + | + |   |
| At2g28590 | + | + | + |   |
| At2g28600 | + | + | + |   |
| At2g28605 | + | + | + |   |
| At2g28620 | + | + | + |   |
| At2g28630 | + | + | + |   |
| At2g28640 | + | + |   | + |
| At2g28650 | + | + | + |   |
| At2g28660 | + | + | + |   |
| At2g28680 | + | + | + | + |
| At2g28720 | + | + | + |   |
| At2g28740 | + | + | + |   |
| At2g28760 | + | + | + |   |
| At2g28790 | + | + | + |   |
| At2g28800 | + | + | + |   |
| At2g28810 | + | + | + |   |
| At2g28840 | + | + | + |   |
| At2g28870 | + | + | + |   |
| At2g28890 | + | + | + |   |
| At2g28900 | + | + | + |   |
| At2g28910 | + | + | + |   |
| At2g28930 | + | + | + |   |
| At2g28940 | + | + |   |   |
| At2g28950 | + | + | + |   |
| At2g29020 | + | + | + |   |
| At2g29040 | + |   |   | + |
| At2g29050 | + | + | + |   |
| At2g29060 | + | + | + |   |
| At2g29070 | + | + | + |   |

|           |   |   |   |   |
|-----------|---|---|---|---|
| At2g29080 | + | + | + |   |
| At2g29090 | + | + | + |   |
| At2g29140 | + | + | + |   |
| At2g29170 |   | + |   |   |
| At2g29180 | + | + | + |   |
| At2g29190 | + | + | + |   |
| At2g29210 | + | + | + |   |
| At2g29290 | + | + | + |   |
| At2g29300 | + | + | + |   |
| At2g29310 | + | + | + |   |
| At2g29320 | + | + | + |   |
| At2g29330 |   |   | + |   |
| At2g29340 | + | + | + |   |
| At2g29350 |   | + | + |   |
| At2g29360 | + | + | + |   |
| At2g29370 | + | + | + |   |
| At2g29390 | + | + | + |   |
| At2g29400 | + | + | + |   |
| At2g29420 | + | + | + |   |
| At2g29450 | + | + | + |   |
| At2g29470 |   | + |   | + |
| At2g29510 | + | + | + |   |
| At2g29530 | + | + | + |   |
| At2g29540 | + | + | + |   |
| At2g29550 | + | + | + |   |
| At2g29560 | + | + | + |   |
| At2g29570 | + | + | + |   |
| At2g29590 | + | + | + |   |
| At2g29600 | + |   |   |   |
| At2g29630 | + | + | + |   |
| At2g29650 | + | + | + |   |
| At2g29660 | + | + | + |   |
| At2g29670 | + | + | + |   |
| At2g29680 | + |   | + |   |
| At2g29690 | + | + | + |   |
| At2g29700 | + | + | + |   |
| At2g29720 | + | + | + |   |
| At2g29730 | + | + | + |   |
| At2g29760 |   | + | + |   |
| At2g29790 | + | + |   | + |
| At2g29890 | + | + | + |   |
| At2g29900 | + | + | + |   |
| At2g29940 | + | + |   |   |
| At2g29960 | + | + | + |   |
| At2g29970 | + | + | + |   |
| At2g29980 | + | + | + |   |
| At2g29990 | + | + | + |   |
| At2g29995 | + |   |   |   |
| At2g30000 | + | + | + |   |
| At2g30010 | + | + | + |   |
| At2g30020 | + | + | + |   |
| At2g30040 |   | + | + |   |

|           |   |   |   |   |
|-----------|---|---|---|---|
| At2g30050 | + | + | + |   |
| At2g30060 | + | + | + |   |
| At2g30070 | + | + | + |   |
| At2g30080 | + | + | + |   |
| At2g30100 | + | + | + |   |
| At2g30110 | + | + | + |   |
| At2g30120 | + | + | + |   |
| At2g30140 | + | + | + |   |
| At2g30150 | + | + | + |   |
| At2g30160 | + | + | + |   |
| At2g30170 | + | + | + |   |
| At2g30200 | + | + | + |   |
| At2g30210 |   | + |   |   |
| At2g30250 | + | + | + |   |
| At2g30260 | + | + | + |   |
| At2g30270 | + | + | + |   |
| At2g30280 | + | + | + |   |
| At2g30290 | + |   |   | + |
| At2g30300 |   |   | + |   |
| At2g30320 | + | + | + |   |
| At2g30330 | + | + | + |   |
| At2g30350 | + | + | + |   |
| At2g30360 | + | + | + |   |
| At2g30390 | + | + | + |   |
| At2g30410 | + | + | + |   |
| At2g30460 | + | + | + |   |
| At2g30470 | + | + | + |   |
| At2g30490 | + | + | + |   |
| At2g30500 | + | + | + |   |
| At2g30510 | + | + | + |   |
| At2g30520 | + | + | + |   |
| At2g30530 | + | + | + |   |
| At2g30540 | + | + | + |   |
| At2g30550 | + | + | + |   |
| At2g30570 | + | + | + |   |
| At2g30580 | + | + | + |   |
| At2g30590 | + | + | + |   |
| At2g30600 | + | + | + |   |
| At2g30610 | + | + | + |   |
| At2g30620 | + | + | + |   |
| At2g30630 | + |   |   | + |
| At2g30640 |   |   | + | + |
| At2g30650 | + | + |   | + |
| At2g30670 | + | + | + |   |
| At2g30690 | + |   |   |   |
| At2g30695 | + | + | + |   |
| At2g30710 | + | + | + |   |
| At2g30740 | + | + | + |   |
| At2g30800 | + | + | + |   |
| At2g30810 |   |   | + |   |
| At2g30820 |   |   | + |   |
| At2g30860 | + | + | + |   |



|           |   |   |   |   |
|-----------|---|---|---|---|
| At2g30870 | + | + | + |   |
| At2g30890 | + | + | + |   |
| At2g30900 |   |   | + |   |
| At2g30910 | + | + | + |   |
| At2g30920 | + | + | + |   |
| At2g30930 | + | + | + |   |
| At2g30950 | + | + | + |   |
| At2g30970 | + | + | + |   |
| At2g30980 | + | + | + |   |
| At2g30990 | + | + | + |   |
| At2g31010 | + | + | + |   |
| At2g31040 | + | + | + |   |
| At2g31060 | + | + | + |   |
| At2g31070 | + | + | + |   |
| At2g31090 | + | + | + |   |
| At2g31100 | + |   |   | + |
| At2g31110 | + | + | + |   |
| At2g31120 | + | + | + |   |
| At2g31130 | + | + | + |   |
| At2g31150 | + | + | + |   |
| At2g31160 | + | + |   |   |
| At2g31170 | + | + | + |   |
| At2g31190 | + | + | + |   |
| At2g31200 | + | + | + |   |
| At2g31210 | + |   |   | + |
| At2g31240 | + | + | + |   |
| At2g31260 | + | + | + |   |
| At2g31270 | + | + | + |   |
| At2g31290 | + | + | + |   |
| At2g31305 | + | + | + |   |
| At2g31320 | + | + | + |   |
| At2g31330 | + |   | + |   |
| At2g31350 | + | + | + |   |
| At2g31360 | + | + | + |   |
| At2g31370 | + | + | + |   |
| At2g31380 | + | + | + |   |
| At2g31390 | + | + | + |   |
| At2g31400 | + | + | + |   |
| At2g31410 | + | + | + |   |
| At2g31440 | + | + | + |   |
| At2g31450 | + | + | + |   |
| At2g31470 | + |   |   | + |
| At2g31490 | + | + | + |   |
| At2g31500 | + | + | + | + |
| At2g31510 | + | + | + |   |
| At2g31530 | + | + | + |   |
| At2g31550 |   | + |   |   |
| At2g31570 | + | + | + |   |
| At2g31610 | + | + | + |   |
| At2g31650 | + | + | + |   |
| At2g31650 | + | + | + |   |
| At2g31660 | + | + | + |   |

|           |   |   |   |   |
|-----------|---|---|---|---|
| At2g31670 | + | + | + |   |
| At2g31680 | + | + | + |   |
| At2g31710 | + | + | + |   |
| At2g31725 | + | + | + | + |
| At2g31730 | + | + | + |   |
| At2g31740 | + | + | + |   |
| At2g31750 | + | + | + |   |
| At2g31790 | + | + | + |   |
| At2g31800 | + | + | + |   |
| At2g31810 | + | + | + |   |
| At2g31820 | + | + | + |   |
| At2g31830 | + | + | + |   |
| At2g31840 | + | + | + |   |
| At2g31870 | + | + | + |   |
| At2g31880 | + | + | + |   |
| At2g31890 | + | + | + |   |
| At2g31900 | + | + | + |   |
| At2g31945 |   | + | + |   |
| At2g31950 | + | + | + |   |
| At2g31960 | + | + | + |   |
| At2g31970 | + | + | + |   |
| At2g31980 | + | + |   |   |
| At2g31990 |   | + |   |   |
| At2g32000 | + | + | + |   |
| At2g32010 | + | + | + |   |
| At2g32030 |   |   | + |   |
| At2g32040 | + | + | + |   |
| At2g32060 | + | + | + |   |
| At2g32070 | + | + | + |   |
| At2g32080 | + | + | + |   |
| At2g32090 | + | + | + |   |
| At2g32100 | + | + | + |   |
| At2g32120 | + | + | + |   |
| At2g32150 | + | + | + |   |
| At2g32160 | + | + | + |   |
| At2g32170 | + | + | + |   |
| At2g32190 |   | + | + |   |
| At2g32210 | + | + | + |   |
| At2g32220 | + | + | + |   |
| At2g32240 | + | + | + |   |
| At2g32260 | + | + | + |   |
| At2g32280 | + |   | + |   |
| At2g32330 | + | + | + |   |
| At2g32380 | + | + | + |   |
| At2g32390 | + |   | + |   |
| At2g32400 | + | + | + |   |
| At2g32410 | + | + | + |   |
| At2g32430 | + | + | + |   |
| At2g32440 | + | + | + |   |
| At2g32450 | + | + | + |   |
| At2g32460 | + | + |   |   |
| At2g32480 | + | + | + |   |

|           |   |   |   |   |
|-----------|---|---|---|---|
| At2g32500 | + | + | + |   |
| At2g32510 | + | + | + |   |
| At2g32520 | + | + | + |   |
| At2g32540 | + | + | + |   |
| At2g32560 | + | + | + |   |
| At2g32580 | + | + | + |   |
| At2g32590 | + | + | + |   |
| At2g32600 | + | + | + |   |
| At2g32640 | + | + | + |   |
| At2g32650 | + | + | + |   |
| At2g32670 | + |   | + |   |
| At2g32680 |   | + |   |   |
| At2g32690 | + | + | + |   |
| At2g32700 | + | + | + |   |
| At2g32710 | + |   |   |   |
| At2g32720 | + | + | + |   |
| At2g32730 | + | + | + |   |
| At2g32750 | + | + | + | + |
| At2g32760 | + | + | + |   |
| At2g32765 | + | + | + |   |
| At2g32770 |   |   | + | + |
| At2g32790 |   | + | + | + |
| At2g32800 | + | + | + |   |
| At2g32810 | + | + | + |   |
| At2g32850 | + | + | + |   |
| At2g32860 | + | + | + |   |
| At2g32880 | + |   |   |   |
| At2g32890 | + |   |   | + |
| At2g32900 | + | + | + |   |
| At2g32910 | + | + | + |   |
| At2g32920 | + | + | + |   |
| At2g32930 | + | + | + |   |
| At2g32950 | + | + | + |   |
| At2g32970 | + | + |   |   |
| At2g32980 | + | + | + |   |
| At2g32990 | + | + | + |   |
| At2g33000 | + |   |   |   |
| At2g33040 | + | + | + |   |
| At2g33100 | + | + | + | + |
| At2g33120 | + | + | + |   |
| At2g33130 |   | + |   | + |
| At2g33150 | + | + | + |   |
| At2g33170 | + | + | + |   |
| At2g33180 | + | + | + |   |
| At2g33210 | + | + | + |   |
| At2g33220 | + | + | + |   |
| At2g33240 | + |   |   | + |
| At2g33255 | + | + | + |   |
| At2g33270 | + | + | + | + |
| At2g33310 | + | + | + |   |
| At2g33330 | + | + | + |   |
| At2g33340 | + | + | + |   |

|           |   |   |   |   |
|-----------|---|---|---|---|
| At2g33360 | + | + | + |   |
| At2g33370 | + | + | + |   |
| At2g33380 | + | + | + |   |
| At2g33390 | + | + | + |   |
| At2g33410 | + | + | + |   |
| At2g33420 | + | + | + | + |
| At2g33430 | + | + | + |   |
| At2g33445 | + | + | + |   |
| At2g33450 | + | + | + |   |
| At2g33460 | + | + | + |   |
| At2g33470 | + | + | + |   |
| At2g33480 | + | + | + |   |
| At2g33500 | + | + | + |   |
| At2g33530 | + | + | + |   |
| At2g33540 | + |   | + |   |
| At2g33570 | + | + | + |   |
| At2g33580 | + |   | + |   |
| At2g33590 | + | + | + |   |
| At2g33600 | + | + | + |   |
| At2g33610 |   | + | + |   |
| At2g33620 | + | + | + |   |
| At2g33630 | + | + | + |   |
| At2g33640 | + |   |   |   |
| At2g33670 | + | + |   | + |
| At2g33690 | + |   |   | + |
| At2g33700 | + | + | + |   |
| At2g33730 | + | + | + |   |
| At2g33735 | + | + | + |   |
| At2g33740 | + | + | + |   |
| At2g33760 | + | + | + |   |
| At2g33770 | + | + | + |   |
| At2g33800 | + | + | + |   |
| At2g33810 | + | + | + |   |
| At2g33820 | + | + | + |   |
| At2g33830 | + | + | + |   |
| At2g33840 | + | + | + |   |
| At2g33845 | + | + | + |   |
| At2g33850 | + | + |   |   |
| At2g33860 | + | + | + |   |
| At2g33870 | + | + |   | + |
| At2g33880 | + | + | + | + |
| At2g33990 | + | + | + |   |
| At2g34040 | + | + | + |   |
| At2g34050 | + | + | + |   |
| At2g34070 | + | + | + |   |
| At2g34090 | + |   | + |   |
| At2g34150 | + | + | + |   |
| At2g34160 | + | + | + |   |
| At2g34190 | + | + | + |   |
| At2g34200 | + | + | + |   |
| At2g34250 | + | + | + |   |
| At2g34260 | + | + | + |   |

|           |   |   |   |   |
|-----------|---|---|---|---|
| At2g34300 | + | + | + |   |
| At2g34310 | + | + | + |   |
| At2g34340 | + | + |   |   |
| At2g34350 | + | + | + |   |
| At2g34410 | + | + | + |   |
| At2g34430 | + | + | + |   |
| At2g34450 |   | + | + |   |
| At2g34460 | + | + | + |   |
| At2g34470 | + | + | + |   |
| At2g34480 | + | + | + |   |
| At2g34490 | + | + | + |   |
| At2g34510 | + | + | + |   |
| At2g34520 | + | + | + |   |
| At2g34555 |   |   | + |   |
| At2g34555 | + |   |   |   |
| At2g34560 | + | + | + |   |
| At2g34570 | + | + | + |   |
| At2g34585 | + | + | + |   |
| At2g34590 | + | + | + |   |
| At2g34600 | + | + |   |   |
| At2g34620 | + | + | + |   |
| At2g34630 | + | + | + |   |
| At2g34640 | + | + | + |   |
| At2g34650 | + | + | + | + |
| At2g34660 | + | + | + |   |
| At2g34680 | + | + | + |   |
| At2g34690 | + | + | + |   |
| At2g34700 | + |   |   | + |
| At2g34710 | + | + | + |   |
| At2g34720 | + | + | + |   |
| At2g34730 | + | + | + |   |
| At2g34750 | + | + | + |   |
| At2g34770 | + | + | + |   |
| At2g34780 | + | + | + |   |
| At2g34790 | + | + | + |   |
| At2g34810 | + | + | + |   |
| At2g34860 | + | + | + |   |
| At2g34870 | + | + |   | + |
| At2g34900 | + | + | + |   |
| At2g34920 | + | + | + |   |
| At2g34970 | + | + | + |   |
| At2g35010 | + | + | + |   |
| At2g35020 | + | + | + |   |
| At2g35030 | + | + | + |   |
| At2g35040 | + | + | + |   |
| At2g35050 | + | + | + |   |
| At2g35060 | + | + | + |   |
| At2g35070 | + |   |   | + |
| At2g35100 | + | + | + |   |
| At2g35110 | + | + | + |   |
| At2g35120 | + | + | + |   |
| At2g35150 | + | + | + |   |

|           |   |   |   |   |
|-----------|---|---|---|---|
| At2g35155 | + | + | + |   |
| At2g35160 | + |   | + | + |
| At2g35190 | + | + | + |   |
| At2g35210 | + |   |   |   |
| At2g35230 | + | + | + |   |
| At2g35260 | + | + | + |   |
| At2g35290 | + | + | + |   |
| At2g35310 | + | + | + | + |
| At2g35320 | + | + | + |   |
| At2g35330 | + | + | + |   |
| At2g35340 | + | + | + |   |
| At2g35360 | + | + | + |   |
| At2g35370 | + | + | + |   |
| At2g35390 | + | + | + |   |
| At2g35410 | + | + | + |   |
| At2g35440 | + | + | + |   |
| At2g35450 | + | + | + |   |
| At2g35460 | + | + | + |   |
| At2g35470 | + | + | + |   |
| At2g35480 | + |   | + |   |
| At2g35490 | + | + | + |   |
| At2g35500 | + | + | + |   |
| At2g35510 | + | + | + |   |
| At2g35520 | + | + | + |   |
| At2g35530 | + | + | + |   |
| At2g35550 | + | + | + |   |
| At2g35600 |   |   | + |   |
| At2g35605 | + | + | + |   |
| At2g35610 | + | + | + |   |
| At2g35620 | + | + | + |   |
| At2g35630 | + | + | + |   |
| At2g35635 | + | + | + |   |
| At2g35650 | + | + | + |   |
| At2g35680 | + | + | + |   |
| At2g35690 | + | + | + |   |
| At2g35710 |   | + |   |   |
| At2g35720 | + | + | + |   |
| At2g35730 | + |   |   |   |
| At2g35733 | + | + | + |   |
| At2g35736 | + | + | + |   |
| At2g35750 | + | + | + |   |
| At2g35760 | + | + | + |   |
| At2g35780 | + | + | + |   |
| At2g35790 | + | + | + |   |
| At2g35795 | + | + | + |   |
| At2g35800 | + | + | + |   |
| At2g35810 | + | + | + |   |
| At2g35820 | + | + | + |   |
| At2g35840 | + | + | + |   |
| At2g35860 | + | + | + |   |
| At2g35870 | + |   | + |   |
| At2g35880 | + | + | + |   |

|           |   |   |   |   |
|-----------|---|---|---|---|
| At2g35900 | + | + | + |   |
| At2g35920 | + | + | + |   |
| At2g35940 | + | + | + |   |
| At2g35950 | + |   |   |   |
| At2g35960 | + | + | + |   |
| At2g35990 |   | + | + |   |
| At2g36000 | + | + | + |   |
| At2g36010 | + | + | + |   |
| At2g36020 | + | + | + | + |
| At2g36060 | + | + | + |   |
| At2g36070 | + | + | + |   |
| At2g36080 |   | + | + | + |
| At2g36130 | + | + | + |   |
| At2g36145 | + | + | + |   |
| At2g36160 | + | + | + |   |
| At2g36170 | + | + | + |   |
| At2g36190 | + | + | + | + |
| At2g36220 | + |   |   |   |
| At2g36230 | + | + | + |   |
| At2g36240 | + | + | + |   |
| At2g36250 | + | + | + |   |
| At2g36270 | + | + |   | + |
| At2g36290 | + | + | + |   |
| At2g36300 | + | + | + |   |
| At2g36310 | + | + | + |   |
| At2g36320 | + | + | + |   |
| At2g36330 | + | + | + |   |
| At2g36350 | + | + | + |   |
| At2g36360 | + | + | + |   |
| At2g36380 | + | + | + |   |
| At2g36390 | + | + | + |   |
| At2g36400 | + | + | + |   |
| At2g36410 | + | + | + |   |
| At2g36430 | + | + | + |   |
| At2g36460 | + | + | + |   |
| At2g36470 |   | + |   |   |
| At2g36480 | + | + | + |   |
| At2g36485 | + | + | + |   |
| At2g36490 | + | + | + |   |
| At2g36530 | + | + | + |   |
| At2g36570 | + |   | + |   |
| At2g36580 | + | + | + |   |
| At2g36590 | + | + | + |   |
| At2g36620 | + | + | + |   |
| At2g36630 | + | + | + |   |
| At2g36660 | + | + | + |   |
| At2g36670 | + | + | + |   |
| At2g36680 | + | + | + |   |
| At2g36710 |   |   | + | + |
| At2g36720 | + | + | + |   |
| At2g36730 | + | + | + |   |
| At2g36740 | + | + | + |   |

|           |   |   |   |   |
|-----------|---|---|---|---|
| At2g36790 | + | + |   | + |
| At2g36810 | + | + | + |   |
| At2g36830 | + | + | + |   |
| At2g36835 | + | + | + |   |
| At2g36840 | + | + | + |   |
| At2g36850 | + | + | + |   |
| At2g36870 | + | + | + |   |
| At2g36880 | + | + | + |   |
| At2g36885 | + | + | + |   |
| At2g36890 | + |   |   |   |
| At2g36900 | + | + | + |   |
| At2g36910 | + | + | + |   |
| At2g36930 | + | + | + |   |
| At2g36950 |   | + | + |   |
| At2g36960 | + | + | + |   |
| At2g36990 | + | + | + |   |
| At2g37020 | + | + | + |   |
| At2g37040 | + | + | + |   |
| At2g37050 | + | + | + |   |
| At2g37080 | + | + | + |   |
| At2g37090 | + |   |   |   |
| At2g37110 | + | + | + |   |
| At2g37120 | + | + | + |   |
| At2g37150 | + | + |   |   |
| At2g37160 | + | + | + |   |
| At2g37180 | + | + | + |   |
| At2g37190 | + | + | + |   |
| At2g37220 | + | + | + |   |
| At2g37240 | + | + | + |   |
| At2g37250 | + | + | + |   |
| At2g37260 |   |   | + | + |
| At2g37270 | + | + | + |   |
| At2g37290 | + |   |   |   |
| At2g37300 | + | + | + |   |
| At2g37340 | + | + | + |   |
| At2g37380 |   | + |   |   |
| At2g37400 | + | + | + |   |
| At2g37410 | + | + | + |   |
| At2g37420 | + | + | + |   |
| At2g37450 | + |   | + |   |
| At2g37460 | + | + | + |   |
| At2g37470 | + | + | + |   |
| At2g37480 | + | + | + |   |
| At2g37490 | + | + | + |   |
| At2g37500 | + | + | + |   |
| At2g37510 | + | + | + |   |
| At2g37520 | + | + | + |   |
| At2g37540 | + | + | + |   |
| At2g37550 | + | + | + |   |
| At2g37560 | + | + | + |   |
| At2g37570 | + | + | + |   |
| At2g37585 | + | + | + |   |



|           |   |   |   |   |
|-----------|---|---|---|---|
| At2g37590 | + | + | + |   |
| At2g37600 | + | + | + |   |
| At2g37610 | + |   |   | + |
| At2g37620 | + | + | + |   |
| At2g37630 | + | + | + |   |
| At2g37640 | + | + | + |   |
| At2g37650 | + | + |   |   |
| At2g37660 | + | + | + |   |
| At2g37680 | + | + | + |   |
| At2g37690 | + | + | + |   |
| At2g37710 | + | + | + |   |
| At2g37720 |   |   | + | + |
| At2g37730 | + |   |   |   |
| At2g37740 |   | + |   |   |
| At2g37750 | + | + | + |   |
| At2g37760 | + | + | + |   |
| At2g37770 | + | + |   | + |
| At2g37780 | + | + | + |   |
| At2g37790 | + | + | + |   |
| At2g37840 | + | + | + |   |
| At2g37850 | + | + | + |   |
| At2g37860 | + | + | + |   |
| At2g37890 | + | + | + |   |
| At2g37920 | + | + | + |   |
| At2g37940 | + | + | + |   |
| At2g37950 | + |   |   |   |
| At2g37970 | + | + | + |   |
| At2g37975 | + | + | + |   |
| At2g37980 | + | + |   |   |
| At2g37990 | + | + | + |   |
| At2g38000 | + | + | + |   |
| At2g38010 | + | + | + |   |
| At2g38020 | + | + | + |   |
| At2g38040 | + | + | + |   |
| At2g38050 | + | + | + |   |
| At2g38060 | + |   |   |   |
| At2g38080 | + | + | + |   |
| At2g38090 | + | + | + |   |
| At2g38100 | + |   |   |   |
| At2g38110 | + | + | + |   |
| At2g38120 | + | + | + |   |
| At2g38130 | + | + | + |   |
| At2g38140 | + | + | + |   |
| At2g38170 | + | + | + |   |
| At2g38180 | + | + | + |   |
| At2g38185 |   |   | + |   |
| At2g38210 | + | + | + |   |
| At2g38240 | + |   |   | + |
| At2g38270 | + | + | + |   |
| At2g38280 | + | + | + |   |
| At2g38290 | + | + | + |   |
| At2g38310 | + | + | + |   |

|           |   |   |   |   |
|-----------|---|---|---|---|
| At2g38320 | + | + | + |   |
| At2g38330 | + | + | + |   |
| At2g38360 | + | + | + |   |
| At2g38370 | + | + | + |   |
| At2g38400 | + | + | + |   |
| At2g38410 | + | + | + |   |
| At2g38420 | + | + | + |   |
| At2g38440 | + | + | + |   |
| At2g38450 | + | + | + |   |
| At2g38460 | + | + | + |   |
| At2g38465 |   | + |   |   |
| At2g38470 | + | + | + |   |
| At2g38480 | + | + | + |   |
| At2g38500 | + | + |   |   |
| At2g38530 | + | + | + |   |
| At2g38540 | + | + | + |   |
| At2g38550 | + | + | + |   |
| At2g38560 | + | + | + |   |
| At2g38570 | + | + | + |   |
| At2g38580 | + | + | + |   |
| At2g38600 |   | + | + |   |
| At2g38610 | + | + | + |   |
| At2g38620 | + | + | + |   |
| At2g38640 | + | + | + |   |
| At2g38650 | + | + | + |   |
| At2g38660 | + | + | + |   |
| At2g38670 | + | + | + |   |
| At2g38680 | + | + | + |   |
| At2g38700 | + | + | + |   |
| At2g38710 | + | + | + |   |
| At2g38720 | + | + | + |   |
| At2g38730 | + | + | + |   |
| At2g38740 | + | + | + |   |
| At2g38750 | + | + | + |   |
| At2g38760 | + | + |   |   |
| At2g38770 | + | + | + |   |
| At2g38780 | + | + | + |   |
| At2g38800 | + | + | + |   |
| At2g38810 | + | + | + |   |
| At2g38820 | + | + | + |   |
| At2g38850 | + | + | + |   |
| At2g38860 | + | + | + |   |
| At2g38870 | + | + | + |   |
| At2g38880 | + | + | + |   |
| At2g38900 |   |   | + | + |
| At2g38905 | + | + |   |   |
| At2g38910 | + |   |   | + |
| At2g38940 | + | + |   |   |
| At2g38950 | + | + |   |   |
| At2g38960 | + | + |   |   |
| At2g38970 | + | + | + |   |
| At2g39000 | + | + | + |   |

|           |   |   |   |   |
|-----------|---|---|---|---|
| At2g39010 | + | + | + |   |
| At2g39020 | + | + | + |   |
| At2g39050 | + | + | + |   |
| At2g39060 | + | + | + |   |
| At2g39070 | + | + | + |   |
| At2g39080 | + | + | + |   |
| At2g39090 | + | + | + |   |
| At2g39110 | + |   |   |   |
| At2g39120 | + | + | + |   |
| At2g39130 | + | + | + |   |
| At2g39140 | + | + | + |   |
| At2g39150 | + | + | + |   |
| At2g39170 | + | + | + |   |
| At2g39180 | + | + |   |   |
| At2g39190 | + | + | + |   |
| At2g39200 |   | + | + |   |
| At2g39210 | + | + | + |   |
| At2g39220 | + | + | + |   |
| At2g39260 | + | + | + |   |
| At2g39280 | + |   |   | + |
| At2g39290 | + | + | + |   |
| At2g39300 | + |   |   |   |
| At2g39310 |   |   | + |   |
| At2g39330 | + | + | + |   |
| At2g39340 | + | + | + |   |
| At2g39350 | + | + | + |   |
| At2g39360 | + | + | + |   |
| At2g39390 | + | + | + |   |
| At2g39400 |   | + |   |   |
| At2g39420 | + | + | + |   |
| At2g39440 | + | + | + |   |
| At2g39450 | + | + | + |   |
| At2g39460 | + | + | + |   |
| At2g39470 | + | + | + |   |
| At2g39480 | + | + | + |   |
| At2g39500 | + | + | + |   |
| At2g39510 | + | + | + |   |
| At2g39540 |   | + | + |   |
| At2g39550 | + | + | + |   |
| At2g39560 |   | + | + | + |
| At2g39570 | + | + | + |   |
| At2g39580 | + | + | + |   |
| At2g39590 | + |   |   | + |
| At2g39620 |   | + |   |   |
| At2g39630 | + | + | + |   |
| At2g39640 |   |   | + | + |
| At2g39650 | + | + | + |   |
| At2g39660 | + | + | + |   |
| At2g39670 | + | + | + |   |
| At2g39680 | + | + | + |   |
| At2g39700 | + | + | + |   |
| At2g39705 | + | + |   |   |

|           |   |   |   |   |
|-----------|---|---|---|---|
| At2g39710 | + | + | + |   |
| At2g39720 | + | + | + |   |
| At2g39725 | + | + | + |   |
| At2g39730 | + | + | + |   |
| At2g39750 | + | + | + |   |
| At2g39760 | + | + | + |   |
| At2g39770 | + | + | + |   |
| At2g39780 | + | + | + |   |
| At2g39795 | + | + | + |   |
| At2g39810 | + | + | + |   |
| At2g39820 | + |   |   | + |
| At2g39830 | + | + | + |   |
| At2g39840 | + | + | + |   |
| At2g39850 | + | + | + |   |
| At2g39870 | + | + | + |   |
| At2g39880 | + | + | + |   |
| At2g39890 | + | + | + |   |
| At2g39900 | + | + | + |   |
| At2g39910 | + | + | + |   |
| At2g39920 | + | + | + |   |
| At2g39930 | + | + | + |   |
| At2g39940 | + | + | + |   |
| At2g39950 | + | + | + |   |
| At2g39960 | + | + | + |   |
| At2g39970 | + | + | + |   |
| At2g39980 | + | + | + |   |
| At2g39990 | + | + | + |   |
| At2g40000 | + | + | + |   |
| At2g40010 | + | + | + |   |
| At2g40020 | + | + | + |   |
| At2g40040 | + | + | + |   |
| At2g40060 | + | + | + |   |
| At2g40070 | + | + | + |   |
| At2g40090 | + | + | + |   |
| At2g40100 | + | + | + |   |
| At2g40110 | + | + | + |   |
| At2g40120 | + | + | + |   |
| At2g40140 | + | + | + |   |
| At2g40150 | + | + | + |   |
| At2g40200 | + | + | + |   |
| At2g40230 | + |   |   |   |
| At2g40240 | + | + | + |   |
| At2g40260 | + | + |   |   |
| At2g40270 | + | + | + |   |
| At2g40280 | + | + | + |   |
| At2g40290 | + | + | + |   |
| At2g40300 | + | + | + |   |
| At2g40316 | + | + | + |   |
| At2g40330 |   | + | + |   |
| At2g40360 | + | + | + |   |
| At2g40400 | + | + | + |   |
| At2g40410 | + | + | + |   |

|           |   |   |   |   |
|-----------|---|---|---|---|
| At2g40420 | + | + | + |   |
| At2g40430 | + | + | + |   |
| At2g40435 | + | + | + |   |
| At2g40460 | + | + | + |   |
| At2g40470 |   | + |   | + |
| At2g40475 | + | + | + |   |
| At2g40480 | + | + | + |   |
| At2g40490 | + | + | + |   |
| At2g40540 | + | + | + |   |
| At2g40550 | + | + | + |   |
| At2g40570 | + | + | + |   |
| At2g40590 | + | + | + |   |
| At2g40600 | + | + | + |   |
| At2g40610 | + | + | + |   |
| At2g40620 | + | + | + |   |
| At2g40630 | + | + | + |   |
| At2g40650 | + | + | + |   |
| At2g40660 | + | + | + |   |
| At2g40670 | + | + | + |   |
| At2g40680 | + | + | + |   |
| At2g40690 | + | + | + |   |
| At2g40700 | + | + | + |   |
| At2g40720 | + | + | + |   |
| At2g40730 | + | + | + |   |
| At2g40750 |   | + |   |   |
| At2g40760 | + | + | + |   |
| At2g40765 | + | + | + |   |
| At2g40770 | + | + | + |   |
| At2g40800 | + | + | + |   |
| At2g40810 | + | + | + |   |
| At2g40820 | + | + | + |   |
| At2g40830 | + | + | + |   |
| At2g40840 | + | + | + |   |
| At2g40860 | + |   |   |   |
| At2g40880 | + | + | + |   |
| At2g40890 | + | + | + |   |
| At2g40900 | + | + | + |   |
| At2g40930 | + | + | + |   |
| At2g40935 | + | + | + |   |
| At2g40940 | + | + | + |   |
| At2g40950 | + | + | + |   |
| At2g40960 | + | + | + |   |
| At2g40980 | + | + | + |   |
| At2g40990 | + | + | + | + |
| At2g41010 | + | + | + |   |
| At2g41020 | + | + | + |   |
| At2g41040 | + | + | + |   |
| At2g41050 | + | + | + |   |
| At2g41060 | + | + | + |   |
| At2g41070 | + |   |   |   |
| At2g41080 | + | + | + |   |
| At2g41090 | + | + | + |   |

|           |   |   |   |   |
|-----------|---|---|---|---|
| At2g41100 | + | + | + |   |
| At2g41110 | + | + | + |   |
| At2g41120 | + | + | + |   |
| At2g41140 | + | + | + |   |
| At2g41160 | + | + | + |   |
| At2g41170 | + | + | + |   |
| At2g41180 | + | + | + |   |
| At2g41190 | + | + | + |   |
| At2g41200 | + |   | + |   |
| At2g41210 | + |   |   |   |
| At2g41220 | + | + | + |   |
| At2g41230 | + | + | + |   |
| At2g41250 | + | + | + |   |
| At2g41290 | + | + | + |   |
| At2g41300 |   |   | + |   |
| At2g41310 | + | + | + |   |
| At2g41330 | + |   | + |   |
| At2g41340 | + | + | + |   |
| At2g41350 | + | + | + |   |
| At2g41370 | + | + |   |   |
| At2g41380 |   | + | + |   |
| At2g41410 | + | + | + |   |
| At2g41420 | + | + | + |   |
| At2g41430 | + | + | + |   |
| At2g41440 | + |   |   | + |
| At2g41460 | + | + | + |   |
| At2g41490 | + | + | + |   |
| At2g41500 | + | + | + |   |
| At2g41520 | + | + | + | + |
| At2g41530 | + | + | + |   |
| At2g41540 | + | + | + |   |
| At2g41550 | + | + | + | + |
| At2g41560 | + | + | + |   |
| At2g41600 | + | + | + |   |
| At2g41610 | + |   |   |   |
| At2g41620 | + | + | + |   |
| At2g41630 | + | + | + |   |
| At2g41640 |   | + | + |   |
| At2g41650 | + | + | + |   |
| At2g41680 | + | + | + |   |
| At2g41700 | + | + | + |   |
| At2g41705 | + | + | + |   |
| At2g41710 | + | + | + |   |
| At2g41720 | + | + | + |   |
| At2g41740 | + | + | + |   |
| At2g41760 | + | + | + |   |
| At2g41770 | + | + | + |   |
| At2g41780 | + |   |   |   |
| At2g41790 | + | + | + |   |
| At2g41800 | + | + |   |   |
| At2g41820 | + | + | + |   |
| At2g41830 | + | + | + |   |

|           |   |   |   |   |
|-----------|---|---|---|---|
| At2g41840 | + | + | + |   |
| At2g41860 | + | + | + | + |
| At2g41880 | + | + | + |   |
| At2g41890 | + | + | + |   |
| At2g41900 | + | + | + |   |
| At2g41940 |   | + | + |   |
| At2g41950 | + | + | + |   |
| At2g41960 | + | + | + |   |
| At2g41970 | + | + |   |   |
| At2g41980 | + | + | + |   |
| At2g41990 | + | + | + |   |
| At2g42010 | + | + | + |   |
| At2g42030 | + | + | + |   |
| At2g42040 | + | + | + |   |
| At2g42070 | + | + | + |   |
| At2g42080 | + | + | + |   |
| At2g42090 |   |   | + | + |
| At2g42110 | + |   | + |   |
| At2g42120 | + | + | + |   |
| At2g42130 | + | + | + |   |
| At2g42140 | + |   |   |   |
| At2g42150 | + |   |   |   |
| At2g42180 | + |   |   | + |
| At2g42190 | + | + | + |   |
| At2g42200 | + | + | + | + |
| At2g42210 | + | + | + |   |
| At2g42220 | + | + | + |   |
| At2g42240 | + | + | + |   |
| At2g42280 | + |   | + |   |
| At2g42290 | + | + | + |   |
| At2g42300 | + | + | + |   |
| At2g42310 | + | + | + |   |
| At2g42320 | + | + | + |   |
| At2g42330 | + | + | + |   |
| At2g42370 |   | + | + | + |
| At2g42380 | + |   | + |   |
| At2g42390 | + | + | + |   |
| At2g42400 | + | + | + |   |
| At2g42410 | + | + |   | + |
| At2g42450 | + | + | + |   |
| At2g42480 | + |   |   | + |
| At2g42490 | + | + | + |   |
| At2g42500 | + | + | + |   |
| At2g42520 | + | + | + |   |
| At2g42530 | + | + | + |   |
| At2g42540 | + | + | + |   |
| At2g42570 | + | + | + |   |
| At2g42580 | + | + | + |   |
| At2g42590 | + | + | + |   |
| At2g42600 | + | + | + |   |
| At2g42620 | + | + | + |   |
| At2g42670 | + | + | + |   |

|           |   |   |   |   |
|-----------|---|---|---|---|
| At2g42680 | + | + | + |   |
| At2g42690 | + | + | + |   |
| At2g42700 | + | + | + |   |
| At2g42710 | + | + | + |   |
| At2g42720 | + |   | + | + |
| At2g42740 | + | + | + |   |
| At2g42750 | + | + | + |   |
| At2g42760 |   | + |   |   |
| At2g42770 | + | + | + |   |
| At2g42780 | + | + | + |   |
| At2g42790 | + | + | + |   |
| At2g42800 | + | + | + |   |
| At2g42810 | + | + | + |   |
| At2g42830 | + | + | + |   |
| At2g42840 | + | + | + |   |
| At2g42860 |   |   | + | + |
| At2g42870 | + | + | + |   |
| At2g42880 | + | + | + |   |
| At2g42890 | + | + | + |   |
| At2g42900 | + | + | + |   |
| At2g42910 | + | + | + |   |
| At2g42940 | + |   |   | + |
| At2g42950 | + |   | + |   |
| At2g42960 | + |   |   | + |
| At2g42990 | + | + |   | + |
| At2g43000 |   | + |   |   |
| At2g43010 | + | + | + |   |
| At2g43020 | + | + | + |   |
| At2g43030 | + | + | + |   |
| At2g43040 | + | + | + |   |
| At2g43050 |   | + |   |   |
| At2g43060 |   | + |   |   |
| At2g43080 | + | + | + |   |
| At2g43090 | + | + | + |   |
| At2g43100 | + | + | + |   |
| At2g43105 | + | + | + |   |
| At2g43130 |   | + | + |   |
| At2g43150 |   | + | + |   |
| At2g43160 | + | + | + |   |
| At2g43170 | + | + | + |   |
| At2g43190 | + | + | + |   |
| At2g43200 | + |   | + |   |
| At2g43210 | + | + | + |   |
| At2g43230 | + | + | + |   |
| At2g43240 | + | + | + |   |
| At2g43260 | + | + | + |   |
| At2g43280 | + | + | + |   |
| At2g43290 | + | + | + |   |
| At2g43310 | + |   | + |   |
| At2g43320 | + | + | + |   |
| At2g43330 | + | + | + |   |
| At2g43350 | + | + | + |   |



|           |   |   |   |   |
|-----------|---|---|---|---|
| At2g43360 | + | + | + |   |
| At2g43370 | + | + | + |   |
| At2g43400 | + | + | + |   |
| At2g43420 | + | + | + |   |
| At2g43430 | + | + | + |   |
| At2g43460 | + | + | + |   |
| At2g43500 | + | + | + |   |
| At2g43510 | + | + | + |   |
| At2g43520 | + | + | + |   |
| At2g43530 | + | + | + |   |
| At2g43535 | + | + | + |   |
| At2g43540 | + | + | + |   |
| At2g43550 | + | + | + |   |
| At2g43560 | + | + | + |   |
| At2g43570 |   | + |   |   |
| At2g43610 |   | + |   |   |
| At2g43620 |   | + | + |   |
| At2g43630 | + | + | + |   |
| At2g43640 | + | + | + |   |
| At2g43650 | + | + | + |   |
| At2g43670 |   |   | + |   |
| At2g43680 | + | + | + |   |
| At2g43690 | + | + |   |   |
| At2g43710 | + | + | + |   |
| At2g43750 | + | + | + |   |
| At2g43760 | + | + | + |   |
| At2g43770 | + | + | + |   |
| At2g43780 | + | + | + |   |
| At2g43790 | + | + | + |   |
| At2g43800 | + | + | + |   |
| At2g43810 | + | + | + |   |
| At2g43840 | + |   |   |   |
| At2g43850 |   | + | + |   |
| At2g43900 | + |   |   | + |
| At2g43920 | + | + | + |   |
| At2g43940 | + | + | + |   |
| At2g43950 | + | + | + |   |
| At2g43970 | + | + | + |   |
| At2g43980 | + | + | + |   |
| At2g43990 | + |   | + |   |
| At2g44020 | + | + | + |   |
| At2g44040 | + | + | + |   |
| At2g44050 | + | + | + |   |
| At2g44060 | + | + | + |   |
| At2g44065 | + | + | + |   |
| At2g44070 | + | + | + |   |
| At2g44080 | + | + | + |   |
| At2g44090 | + | + | + |   |
| At2g44100 | + | + | + |   |
| At2g44120 | + | + | + |   |
| At2g44130 | + | + | + |   |
| At2g44150 | + | + | + |   |

|           |   |   |   |   |
|-----------|---|---|---|---|
| At2g44160 | + | + | + |   |
| At2g44180 | + | + | + |   |
| At2g44190 | + | + | + |   |
| At2g44200 | + | + | + |   |
| At2g44210 | + | + | + |   |
| At2g44230 | + | + | + |   |
| At2g44260 | + | + | + |   |
| At2g44270 | + | + | + |   |
| At2g44310 | + | + | + |   |
| At2g44350 | + | + | + |   |
| At2g44360 | + | + | + |   |
| At2g44420 | + | + | + |   |
| At2g44440 | + | + | + |   |
| At2g44450 | + | + | + |   |
| At2g44460 |   | + | + |   |
| At2g44480 |   | + |   |   |
| At2g44490 | + | + | + |   |
| At2g44500 | + | + | + |   |
| At2g44510 | + | + | + |   |
| At2g44520 | + | + | + |   |
| At2g44525 | + | + | + |   |
| At2g44530 | + | + | + |   |
| At2g44540 |   |   | + | + |
| At2g44560 |   | + | + | + |
| At2g44610 | + | + | + |   |
| At2g44620 | + | + | + |   |
| At2g44630 | + |   | + |   |
| At2g44640 | + | + | + |   |
| At2g44650 | + | + | + |   |
| At2g44660 | + | + | + |   |
| At2g44670 | + | + | + |   |
| At2g44680 | + | + | + |   |
| At2g44690 | + | + | + |   |
| At2g44710 | + | + | + |   |
| At2g44710 | + |   |   |   |
| At2g44730 |   |   | + |   |
| At2g44740 | + | + | + |   |
| At2g44745 |   | + | + |   |
| At2g44750 | + | + | + |   |
| At2g44760 | + | + | + |   |
| At2g44770 | + | + | + |   |
| At2g44790 | + | + | + |   |
| At2g44820 | + | + | + |   |
| At2g44830 | + | + | + |   |
| At2g44860 | + | + | + |   |
| At2g44870 | + | + | + |   |
| At2g44900 | + | + | + |   |
| At2g44920 | + | + | + |   |
| At2g44940 | + | + | + |   |
| At2g44950 | + | + | + |   |
| At2g44960 | + | + | + |   |
| At2g44970 | + | + | + |   |

|           |   |   |   |   |
|-----------|---|---|---|---|
| At2g44980 | + | + | + |   |
| At2g45010 | + | + | + |   |
| At2g45030 | + | + | + |   |
| At2g45040 | + | + |   | + |
| At2g45060 | + | + | + |   |
| At2g45070 | + | + | + |   |
| At2g45080 | + |   |   |   |
| At2g45100 | + | + | + |   |
| At2g45110 |   |   | + | + |
| At2g45130 | + |   |   | + |
| At2g45140 | + | + | + |   |
| At2g45150 | + | + | + |   |
| At2g45160 | + | + | + |   |
| At2g45170 | + | + | + |   |
| At2g45180 | + | + | + |   |
| At2g45190 | + | + | + |   |
| At2g45200 | + | + | + |   |
| At2g45210 |   | + |   |   |
| At2g45220 |   | + |   |   |
| At2g45240 | + | + | + |   |
| At2g45250 | + | + | + |   |
| At2g45280 | + | + |   |   |
| At2g45290 | + | + | + |   |
| At2g45310 | + | + | + |   |
| At2g45320 | + | + | + |   |
| At2g45330 | + | + | + |   |
| At2g45340 | + | + | + |   |
| At2g45400 | + |   |   |   |
| At2g45440 | + | + | + |   |
| At2g45450 | + |   |   |   |
| At2g45460 | + | + | + |   |
| At2g45470 | + | + | + |   |
| At2g45500 | + | + | + |   |
| At2g45520 | + | + | + |   |
| At2g45530 | + | + | + |   |
| At2g45540 | + | + | + |   |
| At2g45560 | + | + |   |   |
| At2g45570 |   | + |   | + |
| At2g45580 | + | + |   |   |
| At2g45590 | + | + | + |   |
| At2g45600 | + | + | + |   |
| At2g45610 | + |   |   | + |
| At2g45620 | + | + | + |   |
| At2g45640 | + | + | + |   |
| At2g45650 | + | + | + | + |
| At2g45660 | + | + | + |   |
| At2g45670 | + | + | + |   |
| At2g45680 | + | + | + |   |
| At2g45690 | + | + | + |   |
| At2g45700 | + | + | + |   |
| At2g45710 | + | + | + |   |
| At2g45720 | + | + | + |   |

|           |   |   |   |   |
|-----------|---|---|---|---|
| At2g45730 | + | + | + |   |
| At2g45740 | + | + | + |   |
| At2g45750 | + | + | + |   |
| At2g45770 | + | + | + |   |
| At2g45790 | + | + | + |   |
| At2g45800 | + | + | + | + |
| At2g45810 | + | + | + |   |
| At2g45820 | + | + | + |   |
| At2g45850 | + | + | + |   |
| At2g45860 | + | + | + |   |
| At2g45870 | + |   | + |   |
| At2g45880 | + | + | + |   |
| At2g45900 | + |   | + | + |
| At2g45910 | + | + | + |   |
| At2g45950 | + | + | + |   |
| At2g45960 | + | + | + |   |
| At2g45970 | + | + | + | + |
| At2g45980 | + | + | + |   |
| At2g45990 | + | + | + |   |
| At2g46000 | + | + | + |   |
| At2g46020 | + | + | + |   |
| At2g46030 | + | + | + |   |
| At2g46060 | + | + | + |   |
| At2g46070 | + |   | + |   |
| At2g46080 | + | + | + |   |
| At2g46090 | + | + | + |   |
| At2g46100 | + | + | + |   |
| At2g46110 |   | + | + |   |
| At2g46140 | + | + | + |   |
| At2g46150 | + | + | + |   |
| At2g46170 | + | + | + |   |
| At2g46180 | + | + | + |   |
| At2g46200 | + |   | + |   |
| At2g46210 | + | + | + |   |
| At2g46220 | + | + | + |   |
| At2g46225 | + | + | + |   |
| At2g46230 | + | + | + |   |
| At2g46240 | + | + | + |   |
| At2g46250 | + | + | + |   |
| At2g46260 | + | + | + |   |
| At2g46270 | + | + | + |   |
| At2g46280 | + | + | + |   |
| At2g46300 |   | + |   | + |
| At2g46330 | + | + | + |   |
| At2g46340 | + | + | + |   |
| At2g46350 | + | + | + |   |
| At2g46360 | + | + | + |   |
| At2g46370 | + | + | + |   |
| At2g46380 | + | + | + |   |
| At2g46390 | + | + | + |   |
| At2g46400 | + | + | + |   |
| At2g46420 | + | + | + |   |

|           |   |   |   |   |
|-----------|---|---|---|---|
| At2g46440 |   | + | + |   |
| At2g46450 | + | + | + |   |
| At2g46470 | + | + | + |   |
| At2g46490 | + | + | + |   |
| At2g46500 | + | + | + |   |
| At2g46505 | + | + | + |   |
| At2g46510 | + | + | + |   |
| At2g46520 | + | + | + |   |
| At2g46530 | + | + | + |   |
| At2g46540 | + | + | + |   |
| At2g46550 | + | + | + |   |
| At2g46560 | + | + | + |   |
| At2g46570 | + |   |   |   |
| At2g46580 | + | + | + |   |
| At2g46590 | + | + | + |   |
| At2g46600 | + | + | + |   |
| At2g46610 | + | + | + |   |
| At2g46620 | + | + | + |   |
| At2g46630 | + | + | + |   |
| At2g46640 | + | + | + |   |
| At2g46650 | + | + | + |   |
| At2g46660 | + | + | + |   |
| At2g46680 | + | + | + |   |
| At2g46690 | + | + | + |   |
| At2g46700 | + | + | + |   |
| At2g46710 | + | + | + |   |
| At2g46735 | + | + | + |   |
| At2g46780 | + | + | + |   |
| At2g46790 | + | + | + |   |
| At2g46800 | + | + | + |   |
| At2g46820 | + | + | + |   |
| At2g46830 | + | + | + |   |
| At2g46860 | + | + | + |   |
| At2g46870 | + | + | + |   |
| At2g46880 | + |   |   |   |
| At2g46900 | + | + | + |   |
| At2g46910 | + | + | + |   |
| At2g46920 | + | + | + |   |
| At2g46930 | + | + | + |   |
| At2g46950 | + | + | + |   |
| At2g46960 |   | + | + | + |
| At2g47010 | + | + | + |   |
| At2g47040 | + | + | + | + |
| At2g47050 | + | + | + | + |
| At2g47060 | + | + | + |   |
| At2g47070 | + | + | + |   |
| At2g47070 | + | + | + |   |
| At2g47110 | + | + | + |   |
| At2g47160 | + | + | + |   |
| At2g47170 | + | + | + |   |
| At2g47180 | + |   | + |   |
| At2g47190 |   | + |   |   |

|           |   |   |   |
|-----------|---|---|---|
| At2g47230 | + | + | + |
| At2g47240 | + | + | + |
| At2g47250 | + | + | + |
| At2g47260 |   | + |   |
| At2g47270 | + | + | + |
| At2g47310 | + |   | + |
| At2g47320 | + | + | + |
| At2g47330 | + | + | + |
| At2g47350 | + | + | + |
| At2g47380 | + | + | + |
| At2g47390 | + | + | + |
| At2g47400 | + | + | + |
| At2g47410 | + | + | + |
| At2g47420 | + | + | + |
| At2g47440 | + | + | + |
| At2g47450 | + | + | + |
| At2g47460 | + |   |   |
| At2g47470 | + | + | + |
| At2g47490 | + | + | + |
| At2g47500 | + | + | + |
| At2g47550 | + | + | + |
| At2g47560 |   | + |   |
| At2g47580 | + | + | + |
| At2g47590 | + | + | + |
| At2g47600 | + | + | + |
| At2g47610 | + | + | + |
| At2g47620 | + |   |   |
| At2g47630 | + | + | + |
| At2g47640 | + | + | + |
| At2g47650 | + | + | + |
| At2g47680 | + |   |   |
| At2g47690 | + | + | + |
| At2g47700 | + | + | + |
| At2g47710 | + | + | + |
| At2g47730 | + | + | + |
| At2g47750 | + | + | + |
| At2g47760 | + | + | + |
| At2g47770 | + | + |   |
| At2g47790 | + | + | + |
| At2g47800 | + | + | + |
| At2g47810 |   | + |   |
| At2g47820 | + | + | + |
| At2g47830 | + | + | + |
| At2g47840 | + | + | + |
| At2g47850 | + | + | + |
| At2g47900 | + | + | + |
| At2g47910 | + | + | + |
| At2g47930 | + | + | + |
| At2g47940 | + | + | + |
| At2g47960 | + | + | + |
| At2g47970 | + | + | + |
| At2g47980 | + | + | + |

|           |   |   |   |   |
|-----------|---|---|---|---|
| At2g47990 | + | + | + |   |
| At2g48010 | + | + | + |   |
| At2g48020 | + | + | + |   |
| At2g48030 | + | + | + |   |
| At2g48040 | + | + | + |   |
| At2g48050 | + | + | + |   |
| At2g48070 | + | + | + |   |
| At2g48100 | + | + | + |   |
| At2g48110 | + | + |   |   |
| At2g48120 | + | + | + |   |
| At2g48130 | + |   |   |   |
| At2g48160 | + | + | + |   |
| At3g01015 | + | + | + |   |
| At3g01020 | + |   |   | + |
| At3g01040 | + | + | + |   |
| At3g01060 | + | + | + |   |
| At3g01070 | + |   |   |   |
| At3g01090 | + | + | + |   |
| At3g01100 | + | + | + |   |
| At3g01120 | + | + | + |   |
| At3g01130 | + | + | + |   |
| At3g01140 | + | + | + |   |
| At3g01150 | + | + | + |   |
| At3g01160 | + | + | + |   |
| At3g01170 | + | + | + |   |
| At3g01180 | + | + | + |   |
| At3g01200 | + | + | + |   |
| At3g01210 | + | + | + |   |
| At3g01240 | + | + | + | + |
| At3g01250 | + | + |   | + |
| At3g01270 | + | + | + |   |
| At3g01280 | + | + | + |   |
| At3g01290 |   | + | + |   |
| At3g01310 | + | + | + |   |
| At3g01320 | + | + | + |   |
| At3g01330 | + | + | + |   |
| At3g01340 | + | + | + |   |
| At3g01360 | + | + | + |   |
| At3g01370 | + | + | + |   |
| At3g01380 | + | + | + |   |
| At3g01390 | + | + | + |   |
| At3g01400 | + | + |   |   |
| At3g01410 |   |   | + |   |
| At3g01420 |   |   | + |   |
| At3g01440 | + | + | + |   |
| At3g01450 | + | + | + |   |
| At3g01460 | + | + | + |   |
| At3g01470 | + | + | + |   |
| At3g01480 | + | + | + |   |
| At3g01490 | + |   |   |   |
| At3g01500 | + | + | + |   |
| At3g01510 | + | + | + |   |

|           |   |   |   |   |
|-----------|---|---|---|---|
| At3g01520 | + | + | + |   |
| At3g01530 |   | + |   | + |
| At3g01540 | + | + | + |   |
| At3g01550 | + | + | + |   |
| At3g01560 | + | + | + |   |
| At3g01590 | + | + | + |   |
| At3g01610 | + | + | + |   |
| At3g01620 |   | + |   | + |
| At3g01640 | + | + | + |   |
| At3g01650 | + | + | + |   |
| At3g01660 | + | + | + |   |
| At3g01670 | + | + | + |   |
| At3g01680 | + | + | + |   |
| At3g01690 | + | + | + |   |
| At3g01700 | + | + | + | + |
| At3g01720 | + | + | + |   |
| At3g01740 | + |   |   |   |
| At3g01750 | + | + | + |   |
| At3g01770 | + | + | + |   |
| At3g01780 | + | + | + |   |
| At3g01790 | + | + | + |   |
| At3g01800 | + | + | + |   |
| At3g01810 | + | + | + |   |
| At3g01820 | + | + | + |   |
| At3g01840 | + | + | + |   |
| At3g01850 | + | + | + |   |
| At3g01860 | + | + | + |   |
| At3g01890 | + | + | + |   |
| At3g01910 | + | + | + |   |
| At3g01920 | + | + | + |   |
| At3g01930 | + | + | + |   |
| At3g01970 |   | + |   |   |
| At3g01980 | + | + | + |   |
| At3g02020 | + | + | + |   |
| At3g02040 | + | + | + |   |
| At3g02050 | + | + | + |   |
| At3g02060 | + | + | + |   |
| At3g02070 | + | + | + |   |
| At3g02080 | + | + | + |   |
| At3g02090 | + | + | + |   |
| At3g02110 | + | + | + |   |
| At3g02120 | + | + | + |   |
| At3g02130 | + | + | + |   |
| At3g02140 | + | + | + |   |
| At3g02150 |   | + | + |   |
| At3g02170 | + | + | + |   |
| At3g02180 | + | + | + |   |
| At3g02190 | + | + | + |   |
| At3g02200 | + | + | + |   |
| At3g02210 | + | + |   |   |
| At3g02220 | + | + | + |   |
| At3g02230 | + | + | + |   |



|           |   |   |   |   |
|-----------|---|---|---|---|
| At3g02250 | + | + | + |   |
| At3g02260 | + | + | + |   |
| At3g02280 | + | + |   |   |
| At3g02290 | + | + | + |   |
| At3g02300 | + | + | + |   |
| At3g02310 | + | + | + | + |
| At3g02320 | + | + | + |   |
| At3g02340 | + |   |   |   |
| At3g02350 | + | + | + |   |
| At3g02360 | + | + | + |   |
| At3g02380 | + | + | + |   |
| At3g02400 | + |   | + |   |
| At3g02420 | + | + | + |   |
| At3g02440 | + |   |   |   |
| At3g02450 | + | + | + |   |
| At3g02460 | + | + | + |   |
| At3g02470 | + | + | + |   |
| At3g02480 | + | + |   |   |
| At3g02490 | + | + | + |   |
| At3g02500 |   |   | + | + |
| At3g02520 | + | + | + |   |
| At3g02530 | + | + | + |   |
| At3g02540 | + | + | + |   |
| At3g02550 | + | + | + |   |
| At3g02555 | + | + | + |   |
| At3g02560 | + | + | + |   |
| At3g02570 | + | + | + |   |
| At3g02580 | + | + | + |   |
| At3g02600 | + | + | + |   |
| At3g02630 | + | + | + |   |
| At3g02640 | + | + | + |   |
| At3g02650 | + | + | + |   |
| At3g02660 | + | + | + |   |
| At3g02670 |   |   | + | + |
| At3g02680 |   | + | + |   |
| At3g02690 | + | + | + |   |
| At3g02700 | + | + | + |   |
| At3g02710 | + | + | + |   |
| At3g02720 | + | + | + |   |
| At3g02730 | + | + | + |   |
| At3g02740 | + | + | + |   |
| At3g02750 | + | + | + |   |
| At3g02760 | + | + | + |   |
| At3g02770 | + | + | + |   |
| At3g02780 | + | + | + |   |
| At3g02790 | + | + | + |   |
| At3g02800 | + | + | + |   |
| At3g02810 | + | + | + | + |
| At3g02820 | + | + | + |   |
| At3g02830 | + | + | + |   |
| At3g02850 |   | + |   |   |
| At3g02860 | + | + | + |   |

|           |   |   |   |   |
|-----------|---|---|---|---|
| At3g02870 | + | + | + |   |
| At3g02875 | + | + | + |   |
| At3g02880 | + | + | + |   |
| At3g02885 |   |   | + |   |
| At3g02890 | + | + | + |   |
| At3g02900 | + | + | + |   |
| At3g02910 | + | + | + |   |
| At3g02920 | + | + | + |   |
| At3g02930 | + | + | + |   |
| At3g02950 | + | + | + |   |
| At3g02970 | + | + | + |   |
| At3g02980 | + |   | + |   |
| At3g02990 | + |   |   |   |
| At3g03020 | + | + | + |   |
| At3g03040 | + | + | + |   |
| At3g03050 | + | + | + |   |
| At3g03070 | + | + | + |   |
| At3g03080 | + | + |   |   |
| At3g03090 | + | + | + |   |
| At3g03100 | + | + | + |   |
| At3g03110 | + | + | + |   |
| At3g03120 | + | + | + |   |
| At3g03130 | + | + | + |   |
| At3g03150 | + | + | + |   |
| At3g03160 | + | + | + |   |
| At3g03180 | + |   |   |   |
| At3g03210 | + | + | + |   |
| At3g03220 | + | + | + |   |
| At3g03240 |   |   | + | + |
| At3g03250 | + | + | + |   |
| At3g03270 | + | + | + |   |
| At3g03300 | + | + | + |   |
| At3g03305 | + | + | + |   |
| At3g03310 | + | + | + |   |
| At3g03320 | + | + | + |   |
| At3g03330 | + | + | + |   |
| At3g03340 | + | + | + |   |
| At3g03360 | + | + | + |   |
| At3g03380 | + | + | + |   |
| At3g03390 | + | + | + |   |
| At3g03410 |   |   | + | + |
| At3g03420 | + | + | + |   |
| At3g03430 | + | + | + | + |
| At3g03440 | + | + | + |   |
| At3g03450 | + | + | + |   |
| At3g03470 | + | + | + |   |
| At3g03480 | + | + |   |   |
| At3g03490 | + | + | + |   |
| At3g03540 | + |   |   |   |
| At3g03550 | + | + | + |   |
| At3g03560 | + | + | + |   |
| At3g03570 | + | + | + |   |

|           |   |   |   |   |
|-----------|---|---|---|---|
| At3g03590 | + | + | + |   |
| At3g03600 | + | + | + |   |
| At3g03610 | + | + | + |   |
| At3g03630 | + | + | + |   |
| At3g03640 | + | + | + |   |
| At3g03670 |   | + |   |   |
| At3g03680 | + | + | + |   |
| At3g03690 | + | + | + |   |
| At3g03710 | + | + | + |   |
| At3g03720 | + | + | + |   |
| At3g03740 | + | + | + |   |
| At3g03750 |   |   | + |   |
| At3g03770 | + | + | + |   |
| At3g03780 | + | + | + |   |
| At3g03790 | + | + | + |   |
| At3g03800 | + | + | + | + |
| At3g03810 | + | + | + |   |
| At3g03840 |   |   | + |   |
| At3g03860 | + | + | + |   |
| At3g03870 | + | + |   |   |
| At3g03880 | + | + | + |   |
| At3g03890 | + | + | + |   |
| At3g03900 | + | + | + |   |
| At3g03910 | + |   | + |   |
| At3g03920 | + | + | + |   |
| At3g03930 | + | + | + |   |
| At3g03950 | + | + | + |   |
| At3g03960 | + | + | + |   |
| At3g03970 | + | + | + |   |
| At3g03980 | + | + | + |   |
| At3g03990 | + | + | + |   |
| At3g04000 |   | + | + |   |
| At3g04010 |   | + |   |   |
| At3g04060 |   | + | + |   |
| At3g04070 | + | + | + |   |
| At3g04080 | + | + | + |   |
| At3g04090 | + | + | + |   |
| At3g04120 | + | + | + |   |
| At3g04160 | + |   |   |   |
| At3g04220 | + | + | + |   |
| At3g04230 | + | + | + |   |
| At3g04240 | + | + | + |   |
| At3g04260 | + | + | + |   |
| At3g04270 |   |   | + |   |
| At3g04280 |   |   | + | + |
| At3g04290 | + | + | + |   |
| At3g04310 | + |   | + |   |
| At3g04340 | + | + | + |   |
| At3g04350 | + | + | + |   |
| At3g04360 | + | + |   | + |
| At3g04400 | + | + | + |   |
| At3g04460 | + | + | + |   |

|           |   |   |   |   |
|-----------|---|---|---|---|
| At3g04470 | + | + | + |   |
| At3g04480 | + | + | + |   |
| At3g04500 | + | + | + |   |
| At3g04520 | + | + | + |   |
| At3g04530 |   | + |   |   |
| At3g04540 |   | + |   | + |
| At3g04550 | + | + | + |   |
| At3g04560 | + | + | + |   |
| At3g04580 | + | + | + |   |
| At3g04590 | + | + | + |   |
| At3g04600 | + | + | + |   |
| At3g04605 | + | + | + |   |
| At3g04610 | + | + | + |   |
| At3g04620 | + | + | + |   |
| At3g04630 | + | + | + |   |
| At3g04640 | + | + | + |   |
| At3g04650 | + | + | + |   |
| At3g04670 | + | + | + |   |
| At3g04680 | + | + | + |   |
| At3g04690 | + | + |   | + |
| At3g04700 | + | + | + | + |
| At3g04710 | + | + | + |   |
| At3g04720 |   | + | + |   |
| At3g04730 | + | + | + |   |
| At3g04740 | + | + | + |   |
| At3g04750 | + | + | + |   |
| At3g04760 | + | + | + |   |
| At3g04770 | + | + | + |   |
| At3g04780 | + | + | + |   |
| At3g04790 | + | + | + |   |
| At3g04810 | + | + | + |   |
| At3g04820 | + | + | + |   |
| At3g04830 | + | + | + |   |
| At3g04840 | + | + | + |   |
| At3g04860 | + | + | + |   |
| At3g04870 | + | + | + |   |
| At3g04880 | + | + | + |   |
| At3g04890 | + |   |   |   |
| At3g04910 | + | + | + |   |
| At3g04920 | + | + | + |   |
| At3g04940 | + | + | + |   |
| At3g04950 | + | + | + |   |
| At3g04960 | + | + | + | + |
| At3g04970 | + | + | + |   |
| At3g04980 | + | + | + | + |
| At3g05000 | + | + | + |   |
| At3g05010 | + | + | + |   |
| At3g05020 | + | + | + |   |
| At3g05030 | + | + | + |   |
| At3g05040 | + | + | + |   |
| At3g05050 | + | + | + |   |
| At3g05060 | + | + | + |   |

|           |   |   |   |   |
|-----------|---|---|---|---|
| At3g05070 | + | + | + |   |
| At3g05090 | + | + | + |   |
| At3g05100 | + | + | + |   |
| At3g05120 | + | + | + |   |
| At3g05130 | + | + | + |   |
| At3g05140 | + | + |   |   |
| At3g05150 |   | + |   |   |
| At3g05165 | + | + | + |   |
| At3g05170 | + |   | + |   |
| At3g05180 | + | + | + |   |
| At3g05190 | + | + | + | + |
| At3g05200 | + | + |   |   |
| At3g05210 | + | + | + |   |
| At3g05220 | + | + | + |   |
| At3g05230 | + | + | + |   |
| At3g05250 | + | + | + |   |
| At3g05270 | + | + | + |   |
| At3g05280 | + | + | + |   |
| At3g05290 | + | + | + |   |
| At3g05320 | + | + | + |   |
| At3g05330 | + | + |   |   |
| At3g05340 | + |   | + |   |
| At3g05350 | + | + | + |   |
| At3g05370 | + |   | + |   |
| At3g05390 |   | + |   |   |
| At3g05400 | + | + | + |   |
| At3g05410 | + | + | + |   |
| At3g05420 | + | + | + |   |
| At3g05430 | + | + | + |   |
| At3g05460 |   | + | + | + |
| At3g05470 | + | + | + |   |
| At3g05480 | + | + | + |   |
| At3g05490 | + | + | + |   |
| At3g05500 | + | + | + |   |
| At3g05510 | + | + | + |   |
| At3g05520 | + | + | + |   |
| At3g05530 | + | + | + |   |
| At3g05560 | + | + | + |   |
| At3g05570 | + | + | + |   |
| At3g05580 | + | + | + |   |
| At3g05590 | + | + | + |   |
| At3g05600 | + | + | + |   |
| At3g05610 | + | + | + | + |
| At3g05640 | + | + | + |   |
| At3g05650 | + | + | + |   |
| At3g05670 | + | + | + |   |
| At3g05675 | + | + | + |   |
| At3g05680 | + | + | + |   |
| At3g05710 | + | + | + |   |
| At3g05750 | + | + | + |   |
| At3g05760 | + | + | + |   |
| At3g05790 | + | + | + | + |

|           |   |   |   |   |
|-----------|---|---|---|---|
| At3g05800 |   | + | + |   |
| At3g05810 | + | + | + |   |
| At3g05820 | + |   |   | + |
| At3g05830 | + | + | + |   |
| At3g05840 | + | + | + |   |
| At3g05850 | + | + | + |   |
| At3g05880 | + | + | + |   |
| At3g05890 | + | + | + |   |
| At3g05900 | + | + | + |   |
| At3g05910 | + | + | + |   |
| At3g05930 | + | + | + | + |
| At3g05940 | + | + | + |   |
| At3g05960 | + |   |   | + |
| At3g05970 | + | + | + |   |
| At3g05980 | + | + | + |   |
| At3g05990 | + | + | + |   |
| At3g06010 | + | + |   |   |
| At3g06020 | + | + | + |   |
| At3g06030 | + | + | + |   |
| At3g06035 | + | + | + |   |
| At3g06040 | + | + | + |   |
| At3g06050 | + | + | + |   |
| At3g06060 | + | + | + |   |
| At3g06070 | + | + | + |   |
| At3g06080 | + | + | + |   |
| At3g06100 | + |   |   | + |
| At3g06110 | + | + | + |   |
| At3g06130 | + | + | + |   |
| At3g06140 | + | + | + |   |
| At3g06150 | + | + | + |   |
| At3g06160 | + | + | + | + |
| At3g06170 | + | + | + |   |
| At3g06180 | + | + | + |   |
| At3g06190 | + | + | + |   |
| At3g06200 | + | + | + |   |
| At3g06210 | + | + | + |   |
| At3g06220 | + | + | + | + |
| At3g06240 | + | + | + |   |
| At3g06250 | + | + | + |   |
| At3g06260 | + | + | + | + |
| At3g06290 | + | + | + |   |
| At3g06300 | + | + | + |   |
| At3g06310 | + | + | + |   |
| At3g06330 | + | + | + |   |
| At3g06340 | + | + | + |   |
| At3g06350 | + | + | + |   |
| At3g06380 | + | + | + |   |
| At3g06400 | + | + | + |   |
| At3g06410 | + | + | + |   |
| At3g06420 | + | + | + |   |
| At3g06440 | + | + | + |   |
| At3g06450 | + | + | + |   |

|           |   |   |   |
|-----------|---|---|---|
| At3g06480 | + | + | + |
| At3g06483 | + | + | + |
| At3g06490 | + | + |   |
| At3g06500 | + | + | + |
| At3g06510 | + | + | + |
| At3g06520 | + |   | + |
| At3g06530 | + | + | + |
| At3g06540 | + | + | + |
| At3g06560 |   | + |   |
| At3g06570 | + | + | + |
| At3g06580 | + | + | + |
| At3g06590 | + | + | + |
| At3g06600 | + | + | + |
| At3g06610 | + | + | + |
| At3g06620 | + | + | + |
| At3g06650 | + | + | + |
| At3g06660 | + | + | + |
| At3g06670 | + | + | + |
| At3g06680 | + | + | + |
| At3g06690 | + | + | + |
| At3g06700 | + | + | + |
| At3g06720 | + | + | + |
| At3g06730 | + | + | + |
| At3g06740 | + | + | + |
| At3g06750 | + | + | + |
| At3g06760 | + | + | + |
| At3g06770 | + | + | + |
| At3g06780 | + | + | + |
| At3g06790 | + | + | + |
| At3g06800 | + | + |   |
| At3g06810 | + | + | + |
| At3g06830 | + | + | + |
| At3g06840 | + | + |   |
| At3g06850 | + | + | + |
| At3g06860 | + | + | + |
| At3g06870 |   |   | + |
| At3g06910 | + | + | + |
| At3g06930 | + | + | + |
| At3g06940 | + | + | + |
| At3g06950 | + | + | + |
| At3g06960 | + | + | + |
| At3g06980 | + | + | + |
| At3g07010 | + | + | + |
| At3g07020 | + | + | + |
| At3g07030 | + | + | + |
| At3g07040 | + | + | + |
| At3g07050 | + | + | + |
| At3g07060 | + | + | + |
| At3g07080 | + | + | + |
| At3g07090 | + | + | + |
| At3g07100 | + | + | + |
| At3g07110 | + | + | + |

|           |   |   |   |
|-----------|---|---|---|
| At3g07130 | + |   |   |
| At3g07140 | + | + | + |
| At3g07160 | + | + | + |
| At3g07170 | + | + | + |
| At3g07180 | + | + | + |
| At3g07190 | + | + | + |
| At3g07200 | + | + | + |
| At3g07210 | + | + | + |
| At3g07230 | + | + | + |
| At3g07260 | + | + | + |
| At3g07270 | + | + | + |
| At3g07280 | + | + | + |
| At3g07300 | + | + | + |
| At3g07310 | + | + | + |
| At3g07320 | + | + | + |
| At3g07330 | + | + | + |
| At3g07340 | + | + | + |
| At3g07350 | + |   |   |
| At3g07360 | + | + | + |
| At3g07370 | + | + | + |
| At3g07390 | + | + | + |
| At3g07400 | + | + | + |
| At3g07410 | + | + | + |
| At3g07420 | + | + | + |
| At3g07430 | + | + | + |
| At3g07440 | + | + | + |
| At3g07450 | + |   | + |
| At3g07470 | + | + | + |
| At3g07480 | + | + | + |
| At3g07510 | + | + | + |
| At3g07540 | + | + | + |
| At3g07550 | + | + | + |
| At3g07560 | + | + | + |
| At3g07565 | + | + | + |
| At3g07570 | + | + | + |
| At3g07580 | + | + | + |
| At3g07590 | + | + | + |
| At3g07610 | + | + | + |
| At3g07630 | + | + | + |
| At3g07640 | + | + | + |
| At3g07650 | + | + |   |
| At3g07660 | + | + | + |
| At3g07670 | + | + | + |
| At3g07680 | + | + | + |
| At3g07690 | + |   | + |
| At3g07700 | + | + | + |
| At3g07720 | + | + | + |
| At3g07730 | + | + | + |
| At3g07740 | + | + | + |
| At3g07750 | + | + | + |
| At3g07760 | + | + | + |
| At3g07770 | + | + | + |



|           |   |   |   |   |
|-----------|---|---|---|---|
| At3g07780 | + | + | + |   |
| At3g07790 | + | + | + |   |
| At3g07800 | + | + | + |   |
| At3g07810 | + | + | + |   |
| At3g07820 | + | + | + | + |
| At3g07830 | + |   |   | + |
| At3g07840 | + |   |   | + |
| At3g07850 | + | + | + | + |
| At3g07860 | + | + | + |   |
| At3g07870 | + | + | + |   |
| At3g07880 | + | + | + |   |
| At3g07890 | + | + | + |   |
| At3g07910 | + | + | + |   |
| At3g07930 |   | + | + |   |
| At3g07940 | + | + | + |   |
| At3g07950 | + | + | + |   |
| At3g07960 | + | + | + |   |
| At3g07970 |   |   | + |   |
| At3g07980 | + | + | + |   |
| At3g07990 | + | + | + |   |
| At3g08010 | + | + | + |   |
| At3g08020 | + | + | + |   |
| At3g08030 | + | + | + |   |
| At3g08040 | + | + |   |   |
| At3g08510 | + | + | + |   |
| At3g08550 | + | + | + |   |
| At3g08560 | + |   |   | + |
| At3g08580 | + | + | + |   |
| At3g08590 | + | + | + |   |
| At3g08600 | + | + | + |   |
| At3g08610 | + | + | + |   |
| At3g08620 | + | + | + |   |
| At3g08630 | + | + | + |   |
| At3g08640 | + | + | + |   |
| At3g08650 | + | + | + |   |
| At3g08660 |   |   | + |   |
| At3g08680 | + | + | + |   |
| At3g08690 | + | + | + |   |
| At3g08710 | + | + | + |   |
| At3g08720 | + | + | + |   |
| At3g08730 | + | + | + |   |
| At3g08740 | + | + | + |   |
| At3g08760 | + | + | + |   |
| At3g08770 | + | + | + |   |
| At3g08780 | + | + | + |   |
| At3g08800 | + |   |   |   |
| At3g08810 | + | + |   |   |
| At3g08840 | + | + | + |   |
| At3g08850 | + | + | + |   |
| At3g08870 |   | + |   |   |
| At3g08880 | + | + | + |   |
| At3g08890 | + | + | + |   |

|           |   |   |   |   |
|-----------|---|---|---|---|
| At3g08910 | + |   | + |   |
| At3g08920 | + | + | + |   |
| At3g08930 | + | + | + |   |
| At3g08940 | + | + | + |   |
| At3g08950 | + | + | + |   |
| At3g08960 | + | + | + |   |
| At3g08970 | + | + |   | + |
| At3g08980 | + | + | + |   |
| At3g08990 | + | + | + |   |
| At3g09000 | + | + | + |   |
| At3g09030 | + |   | + |   |
| At3g09050 | + | + | + |   |
| At3g09070 | + | + | + |   |
| At3g09085 | + | + | + |   |
| At3g09090 | + | + | + |   |
| At3g09100 | + | + | + |   |
| At3g09140 |   |   | + | + |
| At3g09150 | + | + | + |   |
| At3g09160 | + |   | + |   |
| At3g09180 | + | + | + |   |
| At3g09200 | + | + | + |   |
| At3g09210 | + | + | + |   |
| At3g09220 | + | + | + |   |
| At3g09250 | + | + | + |   |
| At3g09270 |   |   | + |   |
| At3g09300 | + | + | + |   |
| At3g09320 | + | + | + |   |
| At3g09350 | + | + | + |   |
| At3g09370 | + | + | + |   |
| At3g09380 | + |   |   |   |
| At3g09390 | + | + | + |   |
| At3g09410 | + | + | + |   |
| At3g09410 | + | + | + |   |
| At3g09440 | + | + | + |   |
| At3g09460 | + | + | + |   |
| At3g09480 | + | + | + |   |
| At3g09500 | + | + | + |   |
| At3g09530 | + | + |   | + |
| At3g09540 | + |   | + |   |
| At3g09550 | + | + |   |   |
| At3g09560 | + | + | + |   |
| At3g09570 | + | + | + |   |
| At3g09580 | + | + | + |   |
| At3g09600 | + | + | + |   |
| At3g09610 | + | + | + |   |
| At3g09630 | + | + | + |   |
| At3g09650 | + | + | + |   |
| At3g09670 | + | + | + |   |
| At3g09680 | + | + | + |   |
| At3g09690 | + | + | + |   |
| At3g09700 | + | + | + |   |
| At3g09710 | + |   | + |   |

|           |   |   |   |   |
|-----------|---|---|---|---|
| At3g09720 | + | + | + |   |
| At3g09730 | + | + | + |   |
| At3g09735 | + | + | + |   |
| At3g09740 | + | + | + |   |
| At3g09760 | + | + | + |   |
| At3g09770 | + | + | + |   |
| At3g09780 | + |   |   |   |
| At3g09800 | + | + | + |   |
| At3g09805 | + | + | + |   |
| At3g09820 | + | + | + |   |
| At3g09830 |   | + |   |   |
| At3g09840 | + | + | + |   |
| At3g09850 | + | + | + |   |
| At3g09860 | + |   |   |   |
| At3g09870 | + |   |   |   |
| At3g09880 | + | + | + |   |
| At3g09890 | + | + | + |   |
| At3g09900 | + | + | + |   |
| At3g09920 | + | + | + |   |
| At3g09930 | + |   |   | + |
| At3g09970 | + | + | + |   |
| At3g09980 | + | + | + |   |
| At3g10010 | + | + | + |   |
| At3g10020 | + | + | + |   |
| At3g10030 | + | + | + |   |
| At3g10040 | + | + | + |   |
| At3g10050 | + | + | + |   |
| At3g10060 | + | + | + |   |
| At3g10070 | + | + | + |   |
| At3g10080 | + | + | + |   |
| At3g10090 | + | + | + |   |
| At3g10140 | + | + | + |   |
| At3g10150 | + | + | + | + |
| At3g10160 | + | + | + |   |
| At3g10190 | + | + | + |   |
| At3g10210 | + | + | + |   |
| At3g10220 | + | + | + |   |
| At3g10230 | + | + | + |   |
| At3g10250 | + | + | + |   |
| At3g10260 | + | + | + |   |
| At3g10270 | + | + | + |   |
| At3g10280 | + | + | + |   |
| At3g10300 | + | + | + |   |
| At3g10310 | + |   | + |   |
| At3g10320 |   | + |   |   |
| At3g10330 | + | + | + |   |
| At3g10340 | + | + | + |   |
| At3g10350 | + | + | + |   |
| At3g10360 | + | + | + |   |
| At3g10370 | + | + | + |   |
| At3g10380 | + | + | + |   |
| At3g10390 | + | + | + |   |

|           |   |   |   |   |
|-----------|---|---|---|---|
| At3g10400 | + |   | + |   |
| At3g10410 | + | + | + |   |
| At3g10420 | + | + | + |   |
| At3g10450 | + | + | + |   |
| At3g10460 | + |   |   | + |
| At3g10470 | + |   |   |   |
| At3g10490 | + | + | + |   |
| At3g10500 | + | + | + |   |
| At3g10520 | + | + | + |   |
| At3g10525 | + | + | + |   |
| At3g10530 | + | + | + |   |
| At3g10540 | + | + | + |   |
| At3g10550 | + | + | + |   |
| At3g10570 | + | + | + | + |
| At3g10580 | + |   |   |   |
| At3g10610 | + | + | + |   |
| At3g10620 | + | + | + |   |
| At3g10630 | + |   | + |   |
| At3g10640 | + | + | + |   |
| At3g10650 | + | + | + |   |
| At3g10670 | + | + | + |   |
| At3g10690 | + | + | + |   |
| At3g10700 | + | + | + |   |
| At3g10720 | + | + | + |   |
| At3g10730 | + | + | + |   |
| At3g10740 | + | + | + |   |
| At3g10760 | + | + | + |   |
| At3g10770 | + | + | + |   |
| At3g10780 |   | + | + | + |
| At3g10800 | + | + | + |   |
| At3g10810 | + | + | + |   |
| At3g10830 | + | + |   |   |
| At3g10840 | + | + | + |   |
| At3g10850 | + | + | + |   |
| At3g10860 | + | + | + |   |
| At3g10880 | + |   | + |   |
| At3g10890 | + | + |   | + |
| At3g10910 |   | + |   |   |
| At3g10920 | + | + | + |   |
| At3g10930 | + |   |   |   |
| At3g10940 | + | + | + |   |
| At3g10960 | + | + | + |   |
| At3g10970 | + | + | + |   |
| At3g10980 | + | + | + |   |
| At3g11000 | + | + | + | + |
| At3g11040 | + | + | + |   |
| At3g11050 | + |   |   | + |
| At3g11090 | + | + | + |   |
| At3g11100 | + | + | + |   |
| At3g11120 | + | + | + |   |
| At3g11130 | + | + | + |   |
| At3g11160 | + |   |   | + |

|           |   |   |   |   |
|-----------|---|---|---|---|
| At3g11170 | + | + | + |   |
| At3g11200 | + | + | + |   |
| At3g11210 | + | + | + |   |
| At3g11230 | + | + | + |   |
| At3g11240 | + |   | + |   |
| At3g11250 | + | + | + |   |
| At3g11270 | + | + | + |   |
| At3g11280 | + | + | + |   |
| At3g11290 | + | + | + |   |
| At3g11320 | + |   | + |   |
| At3g11330 | + |   | + |   |
| At3g11340 |   | + |   |   |
| At3g11410 | + | + | + |   |
| At3g11410 | + | + | + |   |
| At3g11420 | + | + | + |   |
| At3g11430 | + | + |   |   |
| At3g11440 | + | + | + |   |
| At3g11450 | + | + | + |   |
| At3g11480 | + | + | + | + |
| At3g11490 | + | + | + |   |
| At3g11500 | + | + | + |   |
| At3g11510 | + | + | + |   |
| At3g11520 | + |   | + |   |
| At3g11530 | + | + | + |   |
| At3g11540 | + | + | + |   |
| At3g11560 | + | + | + |   |
| At3g11580 | + | + | + |   |
| At3g11590 | + | + | + |   |
| At3g11600 | + | + | + |   |
| At3g11620 | + | + | + |   |
| At3g11630 | + | + | + |   |
| At3g11650 | + | + | + |   |
| At3g11660 | + | + | + |   |
| At3g11670 | + | + | + |   |
| At3g11690 | + | + | + |   |
| At3g11700 | + | + | + |   |
| At3g11710 | + | + | + |   |
| At3g11730 | + | + | + |   |
| At3g11740 |   |   | + | + |
| At3g11745 | + | + | + |   |
| At3g11750 | + | + | + |   |
| At3g11760 | + | + | + |   |
| At3g11770 | + | + | + |   |
| At3g11780 | + | + | + |   |
| At3g11800 | + | + | + |   |
| At3g11820 | + | + | + |   |
| At3g11830 | + | + | + |   |
| At3g11840 |   | + | + |   |
| At3g11850 | + | + | + |   |
| At3g11860 | + | + | + |   |
| At3g11880 | + | + | + |   |
| At3g11900 | + | + | + |   |

|           |   |   |   |   |
|-----------|---|---|---|---|
| At3g11910 | + | + | + |   |
| At3g11930 | + | + |   |   |
| At3g11950 | + | + | + |   |
| At3g11960 | + | + | + |   |
| At3g11964 | + | + | + |   |
| At3g11980 | + |   |   | + |
| At3g12000 | + | + |   | + |
| At3g12010 | + | + | + |   |
| At3g12020 | + | + | + |   |
| At3g12030 | + | + | + |   |
| At3g12040 | + | + | + |   |
| At3g12050 | + | + | + |   |
| At3g12070 | + | + | + |   |
| At3g12080 | + | + | + |   |
| At3g12100 | + | + | + |   |
| At3g12110 | + | + | + |   |
| At3g12120 | + | + | + |   |
| At3g12130 | + | + | + |   |
| At3g12140 | + | + | + |   |
| At3g12150 | + | + | + |   |
| At3g12160 | + | + |   | + |
| At3g12170 | + | + | + |   |
| At3g12180 | + | + | + |   |
| At3g12200 | + | + | + |   |
| At3g12210 | + | + | + |   |
| At3g12250 | + | + | + |   |
| At3g12260 | + | + | + |   |
| At3g12270 | + | + | + |   |
| At3g12280 | + | + | + |   |
| At3g12290 | + | + | + |   |
| At3g12300 | + | + | + |   |
| At3g12320 | + | + | + |   |
| At3g12340 | + | + | + |   |
| At3g12350 | + | + | + |   |
| At3g12360 | + | + | + |   |
| At3g12370 | + | + | + |   |
| At3g12380 | + | + | + |   |
| At3g12390 | + | + | + |   |
| At3g12400 | + | + | + |   |
| At3g12460 | + |   |   | + |
| At3g12480 | + | + | + |   |
| At3g12490 | + | + | + |   |
| At3g12510 | + | + | + | + |
| At3g12520 | + | + | + |   |
| At3g12530 | + | + | + |   |
| At3g12550 | + | + | + |   |
| At3g12560 | + | + | + |   |
| At3g12570 | + | + | + |   |
| At3g12580 | + | + | + |   |
| At3g12590 | + | + | + |   |
| At3g12600 | + | + | + |   |
| At3g12610 | + | + | + |   |

|           |   |   |   |   |
|-----------|---|---|---|---|
| At3g12620 | + | + | + |   |
| At3g12630 | + | + | + |   |
| At3g12640 | + | + | + |   |
| At3g12650 | + | + | + |   |
| At3g12660 | + |   |   | + |
| At3g12670 | + | + | + |   |
| At3g12680 | + | + | + |   |
| At3g12685 | + | + | + |   |
| At3g12690 | + | + | + |   |
| At3g12700 | + | + | + |   |
| At3g12710 | + | + | + |   |
| At3g12730 | + | + | + |   |
| At3g12740 | + | + | + |   |
| At3g12750 | + | + | + |   |
| At3g12760 | + | + | + |   |
| At3g12770 | + |   |   |   |
| At3g12780 | + | + | + |   |
| At3g12790 | + | + | + |   |
| At3g12800 | + | + | + |   |
| At3g12810 | + |   | + |   |
| At3g12830 | + | + |   |   |
| At3g12850 | + |   |   |   |
| At3g12860 | + | + | + |   |
| At3g12870 | + | + | + |   |
| At3g12890 | + | + | + | + |
| At3g12920 | + | + | + |   |
| At3g12930 | + | + | + |   |
| At3g12940 | + | + | + |   |
| At3g12950 | + | + | + |   |
| At3g12980 | + | + | + |   |
| At3g12990 | + | + | + |   |
| At3g13000 | + | + | + |   |
| At3g13030 | + | + | + |   |
| At3g13040 | + | + | + |   |
| At3g13050 | + |   |   |   |
| At3g13060 | + | + | + |   |
| At3g13062 | + | + | + |   |
| At3g13065 | + |   |   | + |
| At3g13070 | + | + | + |   |
| At3g13110 | + | + | + |   |
| At3g13120 | + | + | + |   |
| At3g13150 | + | + | + |   |
| At3g13160 | + | + | + |   |
| At3g13175 | + | + | + |   |
| At3g13180 | + | + | + |   |
| At3g13190 | + | + | + |   |
| At3g13200 | + | + | + |   |
| At3g13220 | + |   |   | + |
| At3g13222 | + | + | + |   |
| At3g13226 | + | + | + |   |
| At3g13228 | + |   |   |   |
| At3g13230 | + | + | + |   |

|           |   |   |   |   |
|-----------|---|---|---|---|
| At3g13235 | + | + | + |   |
| At3g13290 | + | + | + |   |
| At3g13310 | + | + | + |   |
| At3g13320 | + | + | + |   |
| At3g13330 | + | + | + |   |
| At3g13340 | + | + | + |   |
| At3g13350 | + | + | + |   |
| At3g13360 | + | + | + |   |
| At3g13370 |   |   | + | + |
| At3g13380 | + | + | + |   |
| At3g13390 | + | + | + | + |
| At3g13400 | + | + | + |   |
| At3g13410 | + | + | + |   |
| At3g13420 | + |   |   | + |
| At3g13430 | + | + | + |   |
| At3g13440 | + | + | + |   |
| At3g13445 | + | + | + |   |
| At3g13450 | + | + | + |   |
| At3g13460 | + | + | + |   |
| At3g13470 | + | + | + |   |
| At3g13480 | + | + | + |   |
| At3g13490 | + | + | + |   |
| At3g13510 | + | + | + |   |
| At3g13520 | + | + | + |   |
| At3g13540 |   |   | + | + |
| At3g13550 | + | + | + |   |
| At3g13560 | + | + | + |   |
| At3g13570 | + | + | + |   |
| At3g13580 | + | + | + |   |
| At3g13590 | + | + | + |   |
| At3g13610 | + |   |   |   |
| At3g13620 | + | + | + |   |
| At3g13640 | + | + | + | + |
| At3g13650 | + | + | + |   |
| At3g13660 |   | + |   | + |
| At3g13662 | + |   |   |   |
| At3g13670 | + | + | + |   |
| At3g13674 | + | + | + |   |
| At3g13680 | + |   |   |   |
| At3g13682 | + | + | + |   |
| At3g13690 | + | + | + |   |
| At3g13700 | + | + | + |   |
| At3g13720 | + | + | + |   |
| At3g13730 |   | + | + |   |
| At3g13740 | + | + | + |   |
| At3g13750 | + | + | + |   |
| At3g13772 | + | + | + |   |
| At3g13780 | + | + | + |   |
| At3g13790 |   | + | + |   |
| At3g13800 | + | + | + |   |
| At3g13810 | + | + | + |   |
| At3g13845 | + | + | + |   |



|           |   |   |   |   |
|-----------|---|---|---|---|
| At3g13860 | + | + | + |   |
| At3g13870 | + | + | + |   |
| At3g13880 | + | + |   |   |
| At3g13890 | + |   |   | + |
| At3g13900 | + | + | + |   |
| At3g13910 | + | + | + |   |
| At3g13920 | + | + | + |   |
| At3g13930 | + | + | + |   |
| At3g13940 | + | + | + |   |
| At3g13960 | + | + |   |   |
| At3g13970 | + | + |   |   |
| At3g13980 | + | + | + |   |
| At3g14000 | + |   | + |   |
| At3g14010 | + | + | + |   |
| At3g14020 | + | + | + |   |
| At3g14050 | + | + | + |   |
| At3g14060 |   | + |   |   |
| At3g14067 | + | + | + |   |
| At3g14075 | + | + | + |   |
| At3g14080 | + | + | + |   |
| At3g14090 | + | + | + |   |
| At3g14100 | + | + | + |   |
| At3g14110 | + | + | + |   |
| At3g14120 | + | + | + |   |
| At3g14150 | + | + | + |   |
| At3g14180 | + | + | + |   |
| At3g14190 | + | + | + |   |
| At3g14200 | + | + | + |   |
| At3g14205 | + | + | + |   |
| At3g14220 | + | + | + |   |
| At3g14225 |   | + |   |   |
| At3g14230 | + | + | + |   |
| At3g14240 | + | + | + |   |
| At3g14270 | + | + | + |   |
| At3g14280 | + | + | + |   |
| At3g14290 | + | + | + |   |
| At3g14310 | + | + | + |   |
| At3g14330 | + | + | + |   |
| At3g14340 | + | + | + |   |
| At3g14350 | + | + | + |   |
| At3g14360 | + | + | + |   |
| At3g14370 |   | + |   |   |
| At3g14380 | + | + |   |   |
| At3g14390 | + | + | + |   |
| At3g14395 | + | + | + | + |
| At3g14400 | + | + | + |   |
| At3g14410 | + | + | + |   |
| At3g14415 | + | + | + |   |
| At3g14430 | + | + | + |   |
| At3g14450 | + |   |   | + |
| At3g14470 | + | + | + |   |
| At3g14520 |   | + | + | + |

|           |   |   |   |   |
|-----------|---|---|---|---|
| At3g14530 |   | + | + |   |
| At3g14560 | + | + | + |   |
| At3g14570 | + | + | + |   |
| At3g14595 | + | + | + |   |
| At3g14600 | + | + | + |   |
| At3g14610 | + | + | + |   |
| At3g14620 | + | + | + |   |
| At3g14630 |   | + |   |   |
| At3g14650 | + | + | + |   |
| At3g14660 | + | + | + |   |
| At3g14690 | + | + | + |   |
| At3g14720 | + | + | + |   |
| At3g14730 | + | + | + |   |
| At3g14740 | + | + | + |   |
| At3g14750 | + | + |   |   |
| At3g14770 | + | + | + |   |
| At3g14780 | + | + | + |   |
| At3g14790 | + | + | + |   |
| At3g14800 | + | + | + |   |
| At3g14840 | + | + | + |   |
| At3g14850 |   | + | + |   |
| At3g14860 | + | + | + |   |
| At3g14890 | + | + | + |   |
| At3g14900 | + | + | + |   |
| At3g14910 | + | + | + |   |
| At3g14920 | + | + | + |   |
| At3g14930 | + | + | + |   |
| At3g14940 | + | + | + |   |
| At3g14950 |   |   | + | + |
| At3g14960 | + | + | + |   |
| At3g14980 | + | + | + |   |
| At3g14990 | + | + | + |   |
| At3g15000 | + | + | + |   |
| At3g15010 | + | + | + |   |
| At3g15020 | + | + | + |   |
| At3g15030 | + | + | + |   |
| At3g15040 | + | + | + |   |
| At3g15060 | + | + | + |   |
| At3g15070 | + | + | + |   |
| At3g15080 | + | + | + |   |
| At3g15090 | + | + | + |   |
| At3g15095 | + | + | + |   |
| At3g15110 | + | + | + |   |
| At3g15120 | + | + | + |   |
| At3g15140 |   | + |   |   |
| At3g15150 | + | + | + |   |
| At3g15160 | + | + | + |   |
| At3g15170 | + |   |   | + |
| At3g15180 | + | + | + |   |
| At3g15190 | + | + | + |   |
| At3g15210 | + | + | + |   |
| At3g15220 | + | + | + |   |

|           |   |   |   |   |
|-----------|---|---|---|---|
| At3g15260 | + | + | + |   |
| At3g15270 | + | + | + |   |
| At3g15280 | + | + |   |   |
| At3g15290 | + | + | + |   |
| At3g15300 | + | + | + |   |
| At3g15310 |   |   | + |   |
| At3g15350 | + | + | + |   |
| At3g15351 | + | + | + |   |
| At3g15352 | + | + | + |   |
| At3g15353 | + | + | + |   |
| At3g15355 | + | + | + |   |
| At3g15360 | + | + | + |   |
| At3g15380 | + | + | + |   |
| At3g15390 | + |   | + |   |
| At3g15400 | + | + |   | + |
| At3g15410 | + | + | + |   |
| At3g15420 | + | + | + |   |
| At3g15430 | + | + | + |   |
| At3g15440 | + |   |   |   |
| At3g15450 | + | + | + |   |
| At3g15460 | + | + | + |   |
| At3g15470 | + | + | + |   |
| At3g15480 | + | + | + |   |
| At3g15500 |   | + | + |   |
| At3g15510 | + |   |   |   |
| At3g15520 | + | + | + |   |
| At3g15530 | + | + | + |   |
| At3g15540 | + | + | + |   |
| At3g15560 | + | + | + |   |
| At3g15570 | + |   |   |   |
| At3g15580 | + | + | + |   |
| At3g15590 | + | + | + |   |
| At3g15610 | + | + | + |   |
| At3g15620 | + | + | + |   |
| At3g15630 | + | + | + |   |
| At3g15640 | + | + | + |   |
| At3g15650 | + | + | + |   |
| At3g15660 | + | + | + |   |
| At3g15680 | + | + | + |   |
| At3g15690 | + | + | + |   |
| At3g15710 | + | + | + |   |
| At3g15720 | + | + | + |   |
| At3g15730 | + | + | + |   |
| At3g15740 | + |   |   |   |
| At3g15760 | + | + | + |   |
| At3g15770 | + | + | + |   |
| At3g15780 | + | + | + |   |
| At3g15790 | + | + | + |   |
| At3g15810 | + | + | + |   |
| At3g15820 | + | + | + |   |
| At3g15840 | + | + | + |   |
| At3g15850 | + | + | + |   |

|           |   |   |   |   |
|-----------|---|---|---|---|
| At3g15870 | + |   |   | + |
| At3g15880 | + | + | + |   |
| At3g15890 | + | + | + |   |
| At3g15900 | + | + | + |   |
| At3g15910 | + | + | + |   |
| At3g15940 | + | + | + |   |
| At3g15970 | + | + | + |   |
| At3g15980 | + | + | + |   |
| At3g15990 |   | + | + |   |
| At3g16000 | + | + | + |   |
| At3g16010 | + | + | + |   |
| At3g16040 | + | + | + | + |
| At3g16050 | + | + | + |   |
| At3g16060 | + | + | + |   |
| At3g16080 | + | + | + |   |
| At3g16090 | + | + | + |   |
| At3g16100 | + | + | + |   |
| At3g16110 | + | + | + |   |
| At3g16120 | + |   | + |   |
| At3g16140 | + | + | + |   |
| At3g16150 | + | + | + |   |
| At3g16170 | + | + | + |   |
| At3g16175 | + | + | + |   |
| At3g16180 | + | + | + |   |
| At3g16190 | + | + | + |   |
| At3g16200 | + | + | + |   |
| At3g16220 | + | + | + |   |
| At3g16230 | + | + | + |   |
| At3g16240 | + | + | + |   |
| At3g16250 | + | + | + |   |
| At3g16260 | + | + | + |   |
| At3g16270 | + | + | + |   |
| At3g16290 | + | + | + |   |
| At3g16310 | + | + | + |   |
| At3g16320 | + | + | + | + |
| At3g16340 | + | + | + |   |
| At3g16350 | + | + | + |   |
| At3g16370 | + | + | + |   |
| At3g16380 | + | + |   |   |
| At3g16390 | + |   |   |   |
| At3g16460 | + |   | + |   |
| At3g16470 | + | + | + |   |
| At3g16480 | + | + | + |   |
| At3g16490 | + | + | + |   |
| At3g16500 | + | + | + |   |
| At3g16520 | + | + | + |   |
| At3g16560 | + | + | + |   |
| At3g16570 | + | + | + |   |
| At3g16620 | + | + | + |   |
| At3g16630 | + | + | + |   |
| At3g16640 | + | + | + |   |
| At3g16650 | + | + | + |   |

|           |   |   |   |
|-----------|---|---|---|
| At3g16660 |   |   | + |
| At3g16690 | + |   | + |
| At3g16700 | + | + | + |
| At3g16710 |   |   | + |
| At3g16720 | + | + | + |
| At3g16730 |   | + | + |
| At3g16740 | + | + | + |
| At3g16760 | + | + | + |
| At3g16770 |   | + |   |
| At3g16780 | + | + | + |
| At3g16785 | + | + | + |
| At3g16810 | + | + | + |
| At3g16830 | + | + | + |
| At3g16840 | + | + | + |
| At3g16850 | + | + | + |
| At3g16855 | + | + | + |
| At3g16857 | + | + | + |
| At3g16860 | + | + | + |
| At3g16870 | + | + | + |
| At3g16890 |   |   | + |
| At3g16910 | + | + | + |
| At3g16920 | + | + | + |
| At3g16940 | + | + | + |
| At3g16950 | + | + | + |
| At3g16980 | + | + | + |
| At3g17000 | + | + | + |
| At3g17020 | + | + | + |
| At3g17030 | + | + | + |
| At3g17040 | + | + | + |
| At3g17060 |   | + | + |
| At3g17090 | + | + | + |
| At3g17100 | + | + | + |
| At3g17120 | + |   | + |
| At3g17130 | + | + | + |
| At3g17150 |   |   | + |
| At3g17160 | + | + | + |
| At3g17170 | + | + | + |
| At3g17210 | + | + | + |
| At3g17220 | + |   | + |
| At3g17240 | + | + | + |
| At3g17250 | + | + |   |
| At3g17300 | + | + | + |
| At3g17310 | + | + | + |
| At3g17330 | + | + | + |
| At3g17340 | + |   | + |
| At3g17350 | + | + | + |
| At3g17360 | + | + | + |
| At3g17365 | + | + | + |
| At3g17380 | + | + | + |
| At3g17390 | + | + | + |
| At3g17410 | + | + | + |
| At3g17420 | + | + | + |

|           |   |   |   |
|-----------|---|---|---|
| At3g17430 | + | + | + |
| At3g17440 | + | + | + |
| At3g17450 | + | + | + |
| At3g17465 | + | + | + |
| At3g17470 | + | + | + |
| At3g17510 | + | + | + |
| At3g17590 | + | + | + |
| At3g17600 |   |   | + |
| At3g17610 | + | + | + |
| At3g17615 | + | + | + |
| At3g17630 | + | + | + |
| At3g17650 | + | + | + |
| At3g17680 | + | + | + |
| At3g17700 | + | + | + |
| At3g17710 | + | + |   |
| At3g17720 | + |   | + |
| At3g17740 | + | + | + |
| At3g17750 | + | + | + |
| At3g17770 | + | + | + |
| At3g17780 | + | + | + |
| At3g17790 | + | + | + |
| At3g17800 | + | + | + |
| At3g17810 | + | + | + |
| At3g17820 | + | + | + |
| At3g17840 | + | + | + |
| At3g17850 | + | + | + |
| At3g17860 | + | + | + |
| At3g17870 | + | + | + |
| At3g17880 | + | + | + |
| At3g17890 | + | + | + |
| At3g17900 | + | + | + |
| At3g17910 | + | + | + |
| At3g17920 | + | + | + |
| At3g17930 | + | + | + |
| At3g17940 | + | + | + |
| At3g17960 | + | + | + |
| At3g17970 | + | + | + |
| At3g17980 | + | + | + |
| At3g17990 | + | + | + |
| At3g18000 | + | + | + |
| At3g18030 | + | + | + |
| At3g18035 | + | + | + |
| At3g18040 | + | + | + |
| At3g18050 | + | + | + |
| At3g18060 | + | + | + |
| At3g18080 | + | + | + |
| At3g18090 | + | + |   |
| At3g18100 | + | + | + |
| At3g18110 | + | + | + |
| At3g18130 | + | + | + |
| At3g18160 | + | + | + |
| At3g18165 | + | + | + |

|           |   |   |   |   |
|-----------|---|---|---|---|
| At3g18170 |   |   | + |   |
| At3g18190 | + | + | + |   |
| At3g18210 | + | + | + |   |
| At3g18215 | + | + | + |   |
| At3g18220 | + | + |   | + |
| At3g18230 | + | + | + |   |
| At3g18240 | + | + | + |   |
| At3g18250 |   | + | + |   |
| At3g18260 |   |   | + |   |
| At3g18270 | + |   |   |   |
| At3g18280 | + | + | + |   |
| At3g18290 | + | + | + |   |
| At3g18295 | + | + | + |   |
| At3g18310 |   | + | + |   |
| At3g18350 | + | + | + |   |
| At3g18360 | + |   |   | + |
| At3g18370 | + | + | + |   |
| At3g18380 | + | + | + |   |
| At3g18390 | + | + | + |   |
| At3g18420 | + | + | + |   |
| At3g18430 | + | + | + |   |
| At3g18440 | + | + | + |   |
| At3g18480 | + | + | + |   |
| At3g18490 | + | + | + |   |
| At3g18500 | + | + | + |   |
| At3g18510 | + | + | + |   |
| At3g18520 | + | + | + |   |
| At3g18524 | + | + | + |   |
| At3g18525 | + | + | + |   |
| At3g18560 | + | + | + |   |
| At3g18570 | + |   |   | + |
| At3g18600 | + | + | + |   |
| At3g18630 | + | + | + |   |
| At3g18640 | + | + | + |   |
| At3g18660 | + |   |   |   |
| At3g18680 | + | + | + |   |
| At3g18690 | + | + |   |   |
| At3g18710 | + | + | + |   |
| At3g18740 | + | + | + |   |
| At3g18750 | + | + | + |   |
| At3g18760 | + | + | + |   |
| At3g18780 | + | + | + |   |
| At3g18790 | + | + | + |   |
| At3g18800 | + | + | + |   |
| At3g18810 | + | + | + |   |
| At3g18820 | + | + | + |   |
| At3g18830 | + | + | + |   |
| At3g18850 | + | + | + |   |
| At3g18860 | + | + | + |   |
| At3g18880 | + |   |   |   |
| At3g18890 | + | + | + |   |
| At3g18910 | + | + | + |   |

|           |   |   |   |   |
|-----------|---|---|---|---|
| At3g18920 | + | + | + |   |
| At3g18930 | + |   |   |   |
| At3g18940 | + | + | + |   |
| At3g18960 | + | + | + |   |
| At3g18970 | + | + | + |   |
| At3g18980 | + | + | + |   |
| At3g18990 | + | + | + |   |
| At3g19000 | + | + | + |   |
| At3g19010 | + | + | + |   |
| At3g19020 | + | + | + | + |
| At3g19030 | + | + |   |   |
| At3g19090 | + | + | + |   |
| At3g19100 | + | + | + |   |
| At3g19120 | + | + | + |   |
| At3g19130 | + | + | + |   |
| At3g19140 | + | + |   |   |
| At3g19160 |   |   | + |   |
| At3g19170 | + | + | + |   |
| At3g19190 | + | + | + |   |
| At3g19220 | + | + | + |   |
| At3g19230 | + |   | + |   |
| At3g19240 | + | + | + |   |
| At3g19260 | + | + | + |   |
| At3g19270 | + |   |   | + |
| At3g19280 | + | + | + |   |
| At3g19290 | + | + | + |   |
| At3g19310 | + | + | + |   |
| At3g19340 | + | + | + |   |
| At3g19350 | + |   | + |   |
| At3g19360 | + | + | + |   |
| At3g19370 | + | + | + |   |
| At3g19380 | + | + | + |   |
| At3g19390 | + | + |   |   |
| At3g19400 | + | + | + |   |
| At3g19420 | + | + | + |   |
| At3g19440 | + | + | + |   |
| At3g19450 | + | + | + |   |
| At3g19460 | + | + | + |   |
| At3g19480 | + |   | + |   |
| At3g19490 | + | + | + |   |
| At3g19510 | + | + | + |   |
| At3g19515 | + | + | + |   |
| At3g19520 | + | + | + |   |
| At3g19540 | + | + | + |   |
| At3g19550 | + | + | + |   |
| At3g19553 | + | + | + |   |
| At3g19570 | + | + | + |   |
| At3g19580 | + | + | + |   |
| At3g19590 | + | + | + |   |
| At3g19610 | + |   |   |   |
| At3g19620 | + | + | + |   |
| At3g19630 | + | + | + |   |



|           |   |   |   |   |
|-----------|---|---|---|---|
| At3g19640 | + | + | + |   |
| At3g19650 | + | + | + |   |
| At3g19670 | + | + | + |   |
| At3g19680 | + | + | + |   |
| At3g19690 |   | + |   | + |
| At3g19710 | + |   | + |   |
| At3g19720 | + | + | + |   |
| At3g19730 |   | + | + |   |
| At3g19740 | + | + | + |   |
| At3g19760 | + | + | + |   |
| At3g19770 | + | + | + |   |
| At3g19790 | + | + | + |   |
| At3g19800 | + | + | + |   |
| At3g19810 | + | + | + |   |
| At3g19820 | + | + | + |   |
| At3g19840 | + | + | + |   |
| At3g19850 | + | + | + |   |
| At3g19860 | + | + | + |   |
| At3g19870 | + | + | + |   |
| At3g19900 | + | + | + |   |
| At3g19910 | + | + | + |   |
| At3g19930 | + | + | + |   |
| At3g19950 | + | + | + |   |
| At3g19960 | + | + | + |   |
| At3g19970 | + | + | + |   |
| At3g19980 | + | + | + |   |
| At3g20015 | + | + | + |   |
| At3g20015 | + | + | + |   |
| At3g20015 | + | + | + |   |
| At3g20015 | + | + | + |   |
| At3g20020 | + | + | + |   |
| At3g20030 |   |   | + | + |
| At3g20040 | + |   |   |   |
| At3g20050 | + | + | + |   |
| At3g20060 | + | + | + |   |
| At3g20070 | + | + | + |   |
| At3g20090 |   |   | + |   |
| At3g20100 | + | + | + |   |
| At3g20120 | + | + | + |   |
| At3g20150 | + | + | + |   |
| At3g20190 | + | + | + | + |
| At3g20200 |   | + |   | + |
| At3g20210 |   | + | + | + |
| At3g20220 | + | + | + |   |
| At3g20230 | + | + | + |   |
| At3g20240 | + | + | + |   |
| At3g20250 | + | + | + |   |
| At3g20260 | + | + | + |   |
| At3g20270 | + | + | + |   |
| At3g20290 | + | + | + |   |
| At3g20300 | + | + | + |   |
| At3g20310 | + | + | + |   |

|           |   |   |   |   |
|-----------|---|---|---|---|
| At3g20320 | + | + | + |   |
| At3g20330 | + | + | + |   |
| At3g20340 | + |   |   |   |
| At3g20390 | + | + | + |   |
| At3g20410 | + | + | + |   |
| At3g20420 | + |   |   |   |
| At3g20430 | + | + | + |   |
| At3g20450 | + |   |   |   |
| At3g20460 | + | + | + |   |
| At3g20470 | + | + | + |   |
| At3g20475 | + | + | + |   |
| At3g20490 | + | + | + |   |
| At3g20500 | + | + | + |   |
| At3g20510 | + | + | + |   |
| At3g20520 | + | + | + | + |
| At3g20530 | + | + |   | + |
| At3g20550 | + | + | + |   |
| At3g20560 | + | + | + |   |
| At3g20570 | + | + | + |   |
| At3g20580 | + | + | + | + |
| At3g20590 | + | + |   |   |
| At3g20630 | + | + | + |   |
| At3g20650 | + | + | + |   |
| At3g20660 | + | + |   |   |
| At3g20670 | + | + | + |   |
| At3g20680 | + | + | + |   |
| At3g20700 | + |   |   |   |
| At3g20720 | + | + | + |   |
| At3g20730 |   |   | + |   |
| At3g20740 | + | + | + |   |
| At3g20770 | + | + | + |   |
| At3g20780 | + |   | + |   |
| At3g20790 | + | + | + |   |
| At3g20800 | + | + | + |   |
| At3g20810 | + | + |   |   |
| At3g20820 | + | + | + |   |
| At3g20860 |   |   | + |   |
| At3g20865 | + | + | + | + |
| At3g20870 | + | + | + |   |
| At3g20910 | + | + | + |   |
| At3g20920 | + | + | + |   |
| At3g20930 | + | + | + |   |
| At3g20970 | + | + | + |   |
| At3g21000 | + |   |   | + |
| At3g21055 | + | + | + |   |
| At3g21060 | + | + | + |   |
| At3g21070 | + |   | + |   |
| At3g21110 | + | + | + |   |
| At3g21140 | + | + | + |   |
| At3g21160 | + | + | + |   |
| At3g21175 | + | + | + |   |
| At3g21180 | + | + |   |   |

|           |   |   |   |   |
|-----------|---|---|---|---|
| At3g21190 | + | + | + |   |
| At3g21200 | + | + | + |   |
| At3g21220 | + | + | + |   |
| At3g21230 | + | + | + |   |
| At3g21240 | + | + | + |   |
| At3g21250 | + | + | + |   |
| At3g21260 | + |   | + |   |
| At3g21270 | + | + | + |   |
| At3g21280 | + | + | + |   |
| At3g21290 | + | + | + |   |
| At3g21300 | + | + | + |   |
| At3g21310 | + | + | + |   |
| At3g21350 | + | + | + |   |
| At3g21360 | + | + | + |   |
| At3g21390 | + | + | + |   |
| At3g21400 | + | + | + |   |
| At3g21420 | + | + | + |   |
| At3g21430 | + | + | + |   |
| At3g21465 | + | + | + |   |
| At3g21480 | + | + | + |   |
| At3g21500 |   | + | + | + |
| At3g21510 | + | + | + |   |
| At3g21540 | + | + | + |   |
| At3g21550 | + | + | + |   |
| At3g21560 | + | + | + |   |
| At3g21570 | + | + | + | + |
| At3g21580 | + | + | + |   |
| At3g21600 | + |   | + |   |
| At3g21610 | + | + | + |   |
| At3g21620 | + |   |   |   |
| At3g21630 | + | + | + |   |
| At3g21640 | + | + | + |   |
| At3g21650 | + | + | + |   |
| At3g21670 | + | + | + |   |
| At3g21690 | + | + | + |   |
| At3g21700 | + | + | + |   |
| At3g21710 |   | + | + |   |
| At3g21740 | + | + | + |   |
| At3g21750 | + | + | + |   |
| At3g21760 | + | + | + |   |
| At3g21770 | + |   |   |   |
| At3g21790 | + | + | + |   |
| At3g21810 | + | + | + |   |
| At3g21840 |   |   | + |   |
| At3g21865 | + | + | + |   |
| At3g21870 | + | + | + |   |
| At3g21890 | + | + | + |   |
| At3g21920 | + |   |   | + |
| At3g21960 | + |   |   | + |
| At3g21970 | + |   |   | + |
| At3g22020 | + |   |   |   |
| At3g22060 | + | + | + |   |

|           |   |   |   |   |
|-----------|---|---|---|---|
| At3g22070 | + |   | + |   |
| At3g22104 | + | + | + |   |
| At3g22110 | + | + | + |   |
| At3g22120 | + | + | + |   |
| At3g22150 | + |   | + |   |
| At3g22170 | + | + | + |   |
| At3g22180 | + |   |   |   |
| At3g22190 | + | + | + |   |
| At3g22200 | + | + | + |   |
| At3g22210 | + | + | + |   |
| At3g22220 | + | + | + |   |
| At3g22230 | + | + | + |   |
| At3g22240 | + | + | + |   |
| At3g22260 |   | + |   |   |
| At3g22280 | + | + | + |   |
| At3g22290 | + | + | + |   |
| At3g22300 | + | + | + |   |
| At3g22310 | + | + | + |   |
| At3g22320 | + | + | + |   |
| At3g22360 | + |   |   | + |
| At3g22370 | + | + | + |   |
| At3g22380 | + | + | + |   |
| At3g22400 | + |   | + |   |
| At3g22420 | + | + | + |   |
| At3g22422 | + | + | + |   |
| At3g22430 | + | + | + |   |
| At3g22435 | + | + | + |   |
| At3g22440 | + | + | + |   |
| At3g22460 |   | + |   |   |
| At3g22480 | + | + | + |   |
| At3g22520 | + | + | + |   |
| At3g22530 | + | + | + |   |
| At3g22540 | + | + | + |   |
| At3g22550 | + | + | + |   |
| At3g22590 | + | + | + |   |
| At3g22600 |   | + | + |   |
| At3g22620 |   | + | + |   |
| At3g22630 | + | + | + |   |
| At3g22650 | + |   |   | + |
| At3g22660 | + | + | + |   |
| At3g22670 | + | + | + |   |
| At3g22680 | + | + | + |   |
| At3g22740 | + | + | + |   |
| At3g22750 | + | + | + |   |
| At3g22760 | + | + | + |   |
| At3g22780 | + | + | + |   |
| At3g22790 | + | + | + |   |
| At3g22800 | + |   |   |   |
| At3g22810 | + |   |   |   |
| At3g22840 | + | + | + |   |
| At3g22845 | + | + | + |   |
| At3g22850 | + |   | + |   |

|           |   |   |   |   |
|-----------|---|---|---|---|
| At3g22860 | + | + | + | + |
| At3g22880 | + | + | + |   |
| At3g22890 | + | + | + |   |
| At3g22900 | + | + | + |   |
| At3g22910 | + | + |   | + |
| At3g22950 | + | + | + |   |
| At3g22960 | + | + | + |   |
| At3g22980 | + | + | + |   |
| At3g22990 | + | + | + |   |
| At3g23000 | + | + | + |   |
| At3g23020 |   | + |   |   |
| At3g23030 | + | + | + |   |
| At3g23050 | + | + | + |   |
| At3g23070 | + | + | + |   |
| At3g23080 | + | + | + |   |
| At3g23100 | + | + | + |   |
| At3g23120 |   | + |   |   |
| At3g23130 | + | + |   |   |
| At3g23150 | + | + | + |   |
| At3g23160 | + | + | + |   |
| At3g23170 | + | + | + |   |
| At3g23200 | + | + | + |   |
| At3g23210 | + | + | + |   |
| At3g23270 | + |   |   | + |
| At3g23280 | + | + | + |   |
| At3g23290 | + | + | + |   |
| At3g23295 | + | + |   |   |
| At3g23300 | + | + | + |   |
| At3g23310 | + | + | + |   |
| At3g23325 | + | + | + |   |
| At3g23330 | + | + | + |   |
| At3g23350 | + |   |   | + |
| At3g23390 | + | + | + |   |
| At3g23400 | + | + | + |   |
| At3g23410 | + | + | + |   |
| At3g23430 |   |   | + |   |
| At3g23450 |   |   | + | + |
| At3g23460 |   | + |   | + |
| At3g23490 | + | + | + |   |
| At3g23510 | + | + | + |   |
| At3g23530 | + | + | + |   |
| At3g23540 | + | + | + |   |
| At3g23560 | + | + | + |   |
| At3g23570 | + | + |   |   |
| At3g23580 | + | + | + |   |
| At3g23590 | + | + | + |   |
| At3g23600 | + | + | + |   |
| At3g23605 | + | + | + |   |
| At3g23610 | + | + | + |   |
| At3g23620 | + | + | + |   |
| At3g23640 | + | + | + |   |
| At3g23660 | + | + | + |   |

|           |   |   |   |   |
|-----------|---|---|---|---|
| At3g23670 | + | + | + |   |
| At3g23690 | + | + | + |   |
| At3g23700 | + | + | + |   |
| At3g23710 | + | + | + |   |
| At3g23730 | + | + | + |   |
| At3g23740 |   |   | + |   |
| At3g23750 | + | + | + |   |
| At3g23760 | + | + | + |   |
| At3g23770 | + |   |   | + |
| At3g23790 | + | + |   |   |
| At3g23805 | + | + | + |   |
| At3g23810 | + | + | + |   |
| At3g23820 | + | + | + |   |
| At3g23830 | + | + | + |   |
| At3g23840 | + |   |   |   |
| At3g23870 | + |   | + |   |
| At3g23880 | + |   | + |   |
| At3g23890 | + | + | + |   |
| At3g23900 | + | + | + |   |
| At3g23910 | + | + | + |   |
| At3g23920 | + | + | + |   |
| At3g23930 |   |   | + | + |
| At3g23940 | + | + | + |   |
| At3g23970 |   | + | + |   |
| At3g23980 | + | + | + |   |
| At3g23990 | + | + | + |   |
| At3g24010 | + | + | + |   |
| At3g24030 | + | + | + |   |
| At3g24040 | + | + | + |   |
| At3g24050 | + | + | + |   |
| At3g24070 | + | + | + |   |
| At3g24080 | + | + | + |   |
| At3g24090 | + | + | + |   |
| At3g24100 | + | + | + |   |
| At3g24110 | + | + | + |   |
| At3g24120 | + | + | + |   |
| At3g24140 | + | + | + |   |
| At3g24150 | + | + | + | + |
| At3g24160 | + | + | + |   |
| At3g24170 | + | + | + |   |
| At3g24180 | + | + | + |   |
| At3g24190 | + | + | + |   |
| At3g24200 | + | + | + |   |
| At3g24230 | + | + | + |   |
| At3g24280 | + |   | + | + |
| At3g24315 | + | + | + |   |
| At3g24320 | + | + | + |   |
| At3g24340 | + | + | + |   |
| At3g24350 | + | + | + |   |
| At3g24360 | + |   | + |   |
| At3g24430 | + | + | + |   |
| At3g24440 | + | + | + |   |

|           |   |   |   |   |
|-----------|---|---|---|---|
| At3g24450 | + | + | + |   |
| At3g24480 | + | + | + |   |
| At3g24490 | + | + | + |   |
| At3g24492 | + | + | + |   |
| At3g24500 | + | + | + |   |
| At3g24503 | + | + | + |   |
| At3g24506 | + | + | + |   |
| At3g24510 |   | + | + | + |
| At3g24530 | + | + | + |   |
| At3g24550 | + | + | + |   |
| At3g24560 | + | + | + |   |
| At3g24570 | + | + | + |   |
| At3g24590 | + | + | + |   |
| At3g24620 | + | + |   | + |
| At3g24630 | + | + |   |   |
| At3g24660 | + | + | + |   |
| At3g24670 | + | + | + |   |
| At3g24720 | + | + |   |   |
| At3g24740 | + | + | + |   |
| At3g24760 | + | + | + |   |
| At3g24770 | + | + | + |   |
| At3g24780 |   | + |   |   |
| At3g24800 | + | + | + |   |
| At3g24810 | + | + | + |   |
| At3g24820 | + | + | + |   |
| At3g24830 | + | + | + |   |
| At3g24840 | + | + | + |   |
| At3g24870 | + | + | + |   |
| At3g24890 |   |   | + |   |
| At3g25010 | + | + | + |   |
| At3g25040 | + | + | + |   |
| At3g25050 | + |   |   | + |
| At3g25070 | + | + | + |   |
| At3g25100 | + | + | + |   |
| At3g25110 | + | + | + |   |
| At3g25120 | + | + | + |   |
| At3g25130 |   | + | + |   |
| At3g25140 | + | + | + |   |
| At3g25150 | + | + | + |   |
| At3g25160 | + | + | + |   |
| At3g25165 | + | + | + | + |
| At3g25170 | + | + | + | + |
| At3g25180 | + |   | + | + |
| At3g25220 | + | + | + |   |
| At3g25230 | + | + | + |   |
| At3g25260 |   |   | + | + |
| At3g25290 | + | + | + |   |
| At3g25400 | + | + | + |   |
| At3g25410 | + | + | + |   |
| At3g25420 |   | + | + |   |
| At3g25470 | + | + | + |   |
| At3g25480 | + | + | + |   |

|           |   |   |   |   |
|-----------|---|---|---|---|
| At3g25500 | + | + | + |   |
| At3g25520 | + | + | + |   |
| At3g25530 | + | + | + |   |
| At3g25540 | + | + | + |   |
| At3g25545 | + | + | + |   |
| At3g25560 | + | + | + |   |
| At3g25570 | + | + | + |   |
| At3g25580 | + | + | + |   |
| At3g25585 | + | + | + |   |
| At3g25600 | + | + | + |   |
| At3g25620 | + | + | + |   |
| At3g25640 |   |   | + |   |
| At3g25655 |   |   | + |   |
| At3g25660 | + | + | + |   |
| At3g25680 | + | + | + |   |
| At3g25690 | + | + | + |   |
| At3g25710 | + | + | + |   |
| At3g25740 |   |   | + |   |
| At3g25780 | + |   | + |   |
| At3g25800 | + | + | + |   |
| At3g25805 | + | + | + |   |
| At3g25810 |   | + |   |   |
| At3g25830 | + | + |   |   |
| At3g25840 | + | + | + |   |
| At3g25855 |   |   | + |   |
| At3g25860 | + | + | + |   |
| At3g25870 | + | + |   |   |
| At3g25890 | + | + | + |   |
| At3g25900 | + | + | + |   |
| At3g25905 | + | + |   | + |
| At3g25910 | + | + | + |   |
| At3g25920 | + | + | + |   |
| At3g25930 | + |   |   |   |
| At3g25940 | + | + | + |   |
| At3g25950 |   |   | + |   |
| At3g25980 | + | + | + |   |
| At3g25990 | + | + |   |   |
| At3g26000 | + | + | + |   |
| At3g26020 | + | + | + |   |
| At3g26030 | + | + | + |   |
| At3g26050 | + | + | + |   |
| At3g26060 | + | + | + |   |
| At3g26070 | + | + | + |   |
| At3g26085 | + | + | + |   |
| At3g26090 | + | + | + |   |
| At3g26100 | + | + | + |   |
| At3g26110 | + | + | + | + |
| At3g26125 | + | + |   |   |
| At3g26140 | + | + | + |   |
| At3g26170 | + | + | + |   |
| At3g26200 | + | + | + |   |
| At3g26210 |   | + | + |   |



|           |   |   |   |   |
|-----------|---|---|---|---|
| At3g26290 | + | + | + |   |
| At3g26300 | + | + | + |   |
| At3g26310 | + |   |   |   |
| At3g26360 | + | + | + |   |
| At3g26370 | + | + | + |   |
| At3g26380 | + | + | + |   |
| At3g26400 | + | + | + |   |
| At3g26410 | + | + | + |   |
| At3g26420 | + | + | + |   |
| At3g26430 | + |   |   |   |
| At3g26440 | + | + | + |   |
| At3g26450 | + | + | + |   |
| At3g26460 | + |   |   |   |
| At3g26490 | + | + |   |   |
| At3g26510 | + | + | + |   |
| At3g26520 | + | + | + |   |
| At3g26540 | + | + |   |   |
| At3g26560 | + | + | + |   |
| At3g26570 | + | + | + |   |
| At3g26580 | + | + | + |   |
| At3g26590 | + | + | + |   |
| At3g26600 | + | + | + |   |
| At3g26618 | + | + | + |   |
| At3g26630 | + | + | + |   |
| At3g26640 | + | + | + |   |
| At3g26650 | + | + | + |   |
| At3g26670 | + | + | + |   |
| At3g26680 | + | + | + |   |
| At3g26690 | + | + | + |   |
| At3g26700 | + | + | + |   |
| At3g26710 | + | + | + |   |
| At3g26720 | + | + | + |   |
| At3g26730 | + | + | + |   |
| At3g26740 | + | + | + |   |
| At3g26744 | + | + | + |   |
| At3g26750 | + | + | + |   |
| At3g26760 | + | + | + |   |
| At3g26790 | + |   |   | + |
| At3g26800 | + | + | + |   |
| At3g26810 | + | + | + |   |
| At3g26840 | + | + | + |   |
| At3g26850 | + | + | + |   |
| At3g26860 | + | + | + | + |
| At3g26880 | + | + |   |   |
| At3g26890 | + | + | + |   |
| At3g26900 | + | + | + |   |
| At3g26910 | + | + | + |   |
| At3g26932 | + | + | + |   |
| At3g26940 | + |   |   |   |
| At3g26950 | + | + | + |   |
| At3g26960 | + | + | + |   |
| At3g26980 | + | + | + |   |

|           |   |   |   |   |
|-----------|---|---|---|---|
| At3g26980 | + | + | + |   |
| At3g26990 | + | + | + |   |
| At3g27010 | + | + |   |   |
| At3g27020 | + | + | + |   |
| At3g27050 | + | + | + |   |
| At3g27060 | + | + | + |   |
| At3g27080 | + | + | + |   |
| At3g27090 | + | + | + |   |
| At3g27100 | + | + | + |   |
| At3g27110 | + | + | + |   |
| At3g27160 | + | + | + |   |
| At3g27170 |   |   | + |   |
| At3g27180 | + | + | + |   |
| At3g27190 | + | + | + |   |
| At3g27200 | + | + | + |   |
| At3g27210 | + | + | + |   |
| At3g27220 | + |   | + |   |
| At3g27230 | + | + | + |   |
| At3g27240 | + | + | + |   |
| At3g27260 | + | + | + |   |
| At3g27280 | + | + | + |   |
| At3g27290 | + |   | + |   |
| At3g27300 | + | + | + |   |
| At3g27310 | + | + | + |   |
| At3g27320 | + | + | + |   |
| At3g27325 | + | + | + |   |
| At3g27330 | + | + | + |   |
| At3g27340 | + | + | + |   |
| At3g27350 | + | + | + |   |
| At3g27360 | + | + | + |   |
| At3g27380 | + | + | + |   |
| At3g27390 | + | + | + |   |
| At3g27400 |   |   | + |   |
| At3g27410 |   | + |   |   |
| At3g27420 | + | + | + |   |
| At3g27430 | + | + | + |   |
| At3g27440 | + |   |   | + |
| At3g27470 | + | + | + |   |
| At3g27520 | + |   | + |   |
| At3g27530 | + | + | + |   |
| At3g27540 | + | + | + |   |
| At3g27550 | + |   | + |   |
| At3g27560 | + | + | + |   |
| At3g27570 | + | + | + |   |
| At3g27580 | + | + | + |   |
| At3g27610 | + | + |   |   |
| At3g27640 | + |   | + |   |
| At3g27660 | + | + | + | + |
| At3g27670 | + | + | + |   |
| At3g27690 | + | + | + |   |
| At3g27700 | + | + | + |   |
| At3g27710 | + |   | + |   |

|           |   |   |   |   |
|-----------|---|---|---|---|
| At3g27740 | + | + | + |   |
| At3g27750 | + | + | + |   |
| At3g27770 | + | + | + |   |
| At3g27810 | + | + |   | + |
| At3g27812 | + | + |   | + |
| At3g27820 | + | + | + |   |
| At3g27850 | + | + | + |   |
| At3g27870 | + | + | + |   |
| At3g27880 | + | + | + |   |
| At3g27890 | + | + | + |   |
| At3g27925 | + | + | + |   |
| At3g27930 | + | + | + |   |
| At3g27960 | + | + | + |   |
| At3g28007 | + | + | + |   |
| At3g28030 | + |   |   |   |
| At3g28040 | + | + | + |   |
| At3g28050 | + | + | + |   |
| At3g28080 | + | + | + |   |
| At3g28090 |   | + |   |   |
| At3g28130 |   |   | + |   |
| At3g28140 | + | + | + |   |
| At3g28150 | + | + |   |   |
| At3g28180 | + | + | + |   |
| At3g28200 | + | + | + |   |
| At3g28210 |   | + | + |   |
| At3g28220 | + | + | + |   |
| At3g28230 | + | + |   |   |
| At3g28270 | + | + | + |   |
| At3g28330 | + |   |   |   |
| At3g28340 | + | + | + |   |
| At3g28345 |   |   | + |   |
| At3g28420 | + |   | + |   |
| At3g28430 | + |   |   | + |
| At3g28450 | + | + | + |   |
| At3g28460 | + | + | + |   |
| At3g28470 | + |   |   |   |
| At3g28480 | + | + | + |   |
| At3g28490 |   |   | + | + |
| At3g28500 | + | + | + |   |
| At3g28530 | + | + | + |   |
| At3g28630 | + |   |   |   |
| At3g28640 | + |   |   |   |
| At3g28670 | + | + | + |   |
| At3g28690 | + | + | + |   |
| At3g28700 | + | + | + |   |
| At3g28715 | + | + | + |   |
| At3g28720 | + | + | + |   |
| At3g28730 | + | + | + |   |
| At3g28740 | + |   |   |   |
| At3g28750 | + | + | + | + |
| At3g28760 | + | + | + |   |
| At3g28770 | + |   |   |   |

|           |   |   |   |   |
|-----------|---|---|---|---|
| At3g28780 | + |   |   | + |
| At3g28790 | + | + | + | + |
| At3g28820 | + |   |   | + |
| At3g28830 | + | + | + | + |
| At3g28840 | + |   |   | + |
| At3g28850 | + | + | + |   |
| At3g28860 | + | + | + |   |
| At3g28900 | + | + | + |   |
| At3g28910 | + | + | + |   |
| At3g28920 | + | + | + |   |
| At3g28940 | + | + | + |   |
| At3g28950 |   | + | + |   |
| At3g28960 | + |   | + |   |
| At3g28970 | + | + | + |   |
| At3g28980 | + | + | + | + |
| At3g29010 | + | + | + |   |
| At3g29030 | + | + | + |   |
| At3g29060 | + | + |   | + |
| At3g29070 | + |   |   | + |
| At3g29075 | + | + | + |   |
| At3g29090 | + | + | + |   |
| At3g29100 | + | + | + |   |
| At3g29130 | + | + | + |   |
| At3g29160 | + | + | + |   |
| At3g29170 | + | + | + |   |
| At3g29180 | + | + | + |   |
| At3g29185 | + | + | + |   |
| At3g29200 | + | + | + |   |
| At3g29230 | + | + | + |   |
| At3g29240 | + | + | + |   |
| At3g29270 | + | + | + |   |
| At3g29280 | + | + | + |   |
| At3g29290 | + | + | + |   |
| At3g29300 | + |   |   |   |
| At3g29310 | + | + | + |   |
| At3g29320 | + | + | + |   |
| At3g29350 | + | + | + |   |
| At3g29360 | + | + | + |   |
| At3g29370 | + | + | + |   |
| At3g29375 | + | + | + |   |
| At3g29390 | + | + | + |   |
| At3g29400 |   | + |   |   |
| At3g29575 | + | + |   |   |
| At3g29590 |   | + |   |   |
| At3g29760 | + | + | + |   |
| At3g29770 | + |   | + |   |
| At3g29810 | + | + | + |   |
| At3g30180 | + | + | + |   |
| At3g30300 | + | + | + |   |
| At3g30340 | + | + | + |   |
| At3g30380 | + | + | + |   |
| At3g30390 | + | + | + |   |

|           |   |   |   |   |
|-----------|---|---|---|---|
| At3g30530 |   | + |   | + |
| At3g30720 | + |   |   |   |
| At3g30775 | + | + | + |   |
| At3g31920 | + |   |   |   |
| At3g32260 | + | + | + |   |
| At3g32400 | + | + | + |   |
| At3g32920 | + | + | + |   |
| At3g32930 | + | + | + |   |
| At3g32940 | + | + |   |   |
| At3g33520 | + | + | + |   |
| At3g33530 | + | + | + |   |
| At3g42050 | + | + | + |   |
| At3g42150 | + | + | + |   |
| At3g42170 | + | + | + |   |
| At3g42310 |   | + |   |   |
| At3g42570 | + | + |   |   |
| At3g42630 | + | + | + |   |
| At3g42640 | + | + | + |   |
| At3g42660 | + | + | + |   |
| At3g42790 | + | + | + |   |
| At3g42820 |   | + |   |   |
| At3g42850 | + |   |   | + |
| At3g42950 | + | + | + |   |
| At3g42960 | + |   |   |   |
| At3g43110 | + |   |   |   |
| At3g43120 | + | + | + | + |
| At3g43190 |   |   | + |   |
| At3g43220 | + | + | + |   |
| At3g43230 | + | + | + |   |
| At3g43240 | + | + | + |   |
| At3g43270 | + | + | + |   |
| At3g43280 | + |   | + |   |
| At3g43300 | + | + | + |   |
| At3g43400 | + | + | + |   |
| At3g43430 |   | + |   |   |
| At3g43510 | + | + | + |   |
| At3g43520 | + | + | + |   |
| At3g43540 | + | + | + |   |
| At3g43590 | + | + | + |   |
| At3g43610 | + | + | + |   |
| At3g43670 | + |   | + |   |
| At3g43700 | + | + | + |   |
| At3g43720 | + | + | + |   |
| At3g43800 | + | + | + |   |
| At3g43810 | + | + | + |   |
| At3g43860 | + | + | + | + |
| At3g43920 | + | + | + |   |
| At3g43960 | + |   | + |   |
| At3g43980 | + | + | + |   |
| At3g44020 | + | + | + |   |
| At3g44050 | + | + | + |   |
| At3g44070 | + | + | + |   |

|           |   |   |   |
|-----------|---|---|---|
| At3g44100 | + | + | + |
| At3g44110 | + | + | + |
| At3g44190 | + | + | + |
| At3g44200 | + | + | + |
| At3g44240 | + |   |   |
| At3g44250 |   | + | + |
| At3g44260 | + |   |   |
| At3g44280 | + | + | + |
| At3g44300 | + | + | + |
| At3g44330 | + | + | + |
| At3g44340 | + | + | + |
| At3g44370 | + |   | + |
| At3g44380 | + | + | + |
| At3g44410 |   |   | + |
| At3g44450 | + | + | + |
| At3g44480 | + |   | + |
| At3g44490 | + | + | + |
| At3g44530 | + | + | + |
| At3g44540 |   | + | + |
| At3g44550 |   | + | + |
| At3g44590 | + | + | + |
| At3g44600 | + | + | + |
| At3g44610 | + | + | + |
| At3g44620 | + | + | + |
| At3g44630 | + | + | + |
| At3g44680 | + | + | + |
| At3g44720 | + |   | + |
| At3g44730 |   | + | + |
| At3g44735 | + | + | + |
| At3g44740 | + | + | + |
| At3g44750 | + | + | + |
| At3g44770 | + |   |   |
| At3g44820 |   |   | + |
| At3g44850 | + | + | + |
| At3g44860 |   | + |   |
| At3g44880 | + | + | + |
| At3g44890 | + | + | + |
| At3g44940 | + | + | + |
| At3g45010 | + | + | + |
| At3g45030 | + | + | + |
| At3g45040 | + | + | + |
| At3g45050 | + | + | + |
| At3g45070 | + |   |   |
| At3g45090 | + | + | + |
| At3g45100 | + | + | + |
| At3g45110 |   |   | + |
| At3g45140 | + | + | + |
| At3g45160 |   |   | + |
| At3g45190 | + | + | + |
| At3g45210 | + | + | + |
| At3g45230 | + | + | + |
| At3g45240 | + | + | + |

|           |   |   |   |   |
|-----------|---|---|---|---|
| At3g45260 |   | + |   |   |
| At3g45280 | + | + |   | + |
| At3g45290 | + | + | + |   |
| At3g45300 | + | + | + |   |
| At3g45310 | + | + | + |   |
| At3g45320 | + |   |   | + |
| At3g45440 | + | + | + |   |
| At3g45450 | + | + | + |   |
| At3g45480 | + |   |   |   |
| At3g45590 | + | + | + |   |
| At3g45600 | + | + | + |   |
| At3g45620 | + | + | + |   |
| At3g45630 | + | + | + |   |
| At3g45640 | + | + | + |   |
| At3g45740 | + | + | + |   |
| At3g45750 | + | + | + |   |
| At3g45770 | + | + | + |   |
| At3g45780 | + | + | + |   |
| At3g45830 | + | + | + |   |
| At3g45850 | + | + | + |   |
| At3g45870 | + |   |   |   |
| At3g45880 | + | + | + |   |
| At3g45900 | + | + | + |   |
| At3g45930 | + | + | + |   |
| At3g45940 |   | + |   | + |
| At3g45960 |   | + |   |   |
| At3g45970 | + | + | + |   |
| At3g45980 | + | + | + |   |
| At3g46000 | + | + | + |   |
| At3g46010 | + | + | + |   |
| At3g46020 | + | + | + |   |
| At3g46030 | + | + | + |   |
| At3g46040 | + | + | + |   |
| At3g46060 | + | + | + |   |
| At3g46100 | + | + | + |   |
| At3g46110 |   | + |   |   |
| At3g46180 | + | + | + |   |
| At3g46210 | + | + | + |   |
| At3g46220 | + | + | + |   |
| At3g46230 |   |   | + |   |
| At3g46280 |   |   | + |   |
| At3g46290 | + | + | + |   |
| At3g46430 | + | + | + |   |
| At3g46440 | + | + | + |   |
| At3g46450 | + | + | + |   |
| At3g46460 | + | + | + |   |
| At3g46510 | + | + | + |   |
| At3g46520 | + |   |   | + |
| At3g46540 | + | + | + |   |
| At3g46560 | + | + | + |   |
| At3g46580 | + |   | + |   |
| At3g46590 | + | + | + |   |

|           |   |   |   |   |
|-----------|---|---|---|---|
| At3g46600 | + | + | + |   |
| At3g46610 | + | + | + |   |
| At3g46620 | + | + | + |   |
| At3g46630 | + | + | + |   |
| At3g46640 | + |   | + |   |
| At3g46670 | + | + | + |   |
| At3g46740 | + | + | + |   |
| At3g46750 | + |   |   | + |
| At3g46770 | + | + | + | + |
| At3g46780 | + | + | + |   |
| At3g46790 | + | + | + |   |
| At3g46820 | + | + | + |   |
| At3g46830 | + | + | + |   |
| At3g46840 | + | + |   | + |
| At3g46880 |   | + | + |   |
| At3g46900 | + | + | + |   |
| At3g46920 | + | + |   |   |
| At3g46930 | + | + |   |   |
| At3g46940 | + | + | + |   |
| At3g46960 | + | + | + |   |
| At3g46970 | + | + | + |   |
| At3g46980 | + | + | + |   |
| At3g47000 | + | + | + |   |
| At3g47060 | + | + | + |   |
| At3g47070 | + | + | + |   |
| At3g47080 | + | + | + |   |
| At3g47090 |   | + | + | + |
| At3g47120 | + | + | + |   |
| At3g47160 | + | + | + |   |
| At3g47220 | + | + | + |   |
| At3g47250 | + | + | + |   |
| At3g47295 | + | + | + |   |
| At3g47340 | + | + | + |   |
| At3g47370 | + | + | + |   |
| At3g47380 | + | + | + |   |
| At3g47390 | + | + | + |   |
| At3g47420 | + | + | + |   |
| At3g47430 | + | + | + |   |
| At3g47440 | + | + |   | + |
| At3g47450 | + | + | + |   |
| At3g47460 | + | + | + |   |
| At3g47470 | + | + | + |   |
| At3g47480 |   | + |   |   |
| At3g47490 | + | + | + |   |
| At3g47500 | + | + | + |   |
| At3g47510 | + | + | + |   |
| At3g47520 | + | + | + |   |
| At3g47540 | + | + | + |   |
| At3g47550 | + | + | + |   |
| At3g47560 | + | + | + |   |
| At3g47590 | + | + | + |   |
| At3g47600 | + | + | + |   |



|           |   |   |   |
|-----------|---|---|---|
| At3g47610 | + | + | + |
| At3g47620 | + | + | + |
| At3g47630 | + | + | + |
| At3g47640 | + | + | + |
| At3g47650 | + | + | + |
| At3g47670 | + | + | + |
| At3g47700 | + | + | + |
| At3g47730 | + | + | + |
| At3g47800 | + | + | + |
| At3g47810 | + | + | + |
| At3g47833 | + | + | + |
| At3g47836 | + | + | + |
| At3g47850 | + | + | + |
| At3g47860 | + | + | + |
| At3g47890 | + | + | + |
| At3g47910 | + | + | + |
| At3g47930 | + | + | + |
| At3g47940 | + | + | + |
| At3g47950 | + | + | + |
| At3g47960 | + | + | + |
| At3g47990 | + |   | + |
| At3g48000 | + | + | + |
| At3g48040 | + | + | + |
| At3g48050 | + | + | + |
| At3g48070 | + | + | + |
| At3g48090 | + | + | + |
| At3g48100 | + | + | + |
| At3g48110 | + | + | + |
| At3g48140 | + | + | + |
| At3g48150 | + | + | + |
| At3g48170 | + | + | + |
| At3g48185 | + | + | + |
| At3g48190 | + | + | + |
| At3g48200 | + | + | + |
| At3g48210 |   | + | + |
| At3g48250 | + | + | + |
| At3g48350 | + |   | + |
| At3g48410 | + |   | + |
| At3g48420 | + | + | + |
| At3g48425 | + | + | + |
| At3g48440 | + | + | + |
| At3g48450 | + | + |   |
| At3g48460 | + | + | + |
| At3g48490 |   |   | + |
| At3g48500 | + | + | + |
| At3g48510 | + | + | + |
| At3g48520 | + | + |   |
| At3g48530 | + | + | + |
| At3g48550 | + | + | + |
| At3g48560 | + | + | + |
| At3g48565 | + | + | + |
| At3g48570 | + | + | + |

|           |   |   |   |   |
|-----------|---|---|---|---|
| At3g48580 | + | + | + | + |
| At3g48610 | + | + | + |   |
| At3g48620 | + | + | + |   |
| At3g48640 | + | + | + |   |
| At3g48650 |   | + |   |   |
| At3g48680 | + | + | + |   |
| At3g48690 | + | + | + |   |
| At3g48710 | + | + | + |   |
| At3g48720 |   |   | + |   |
| At3g48730 | + | + | + |   |
| At3g48740 | + | + | + |   |
| At3g48750 | + | + | + |   |
| At3g48760 | + | + | + |   |
| At3g48770 |   | + |   | + |
| At3g48790 | + | + | + |   |
| At3g48860 | + | + | + |   |
| At3g48880 | + | + | + |   |
| At3g48890 | + | + | + |   |
| At3g48930 | + | + | + |   |
| At3g48940 | + |   |   |   |
| At3g48950 |   | + | + | + |
| At3g48960 | + | + | + |   |
| At3g48970 | + | + | + |   |
| At3g48990 | + | + | + |   |
| At3g49000 | + | + | + |   |
| At3g49010 | + | + | + |   |
| At3g49050 | + | + | + |   |
| At3g49060 | + | + | + |   |
| At3g49080 | + | + | + |   |
| At3g49090 | + |   |   | + |
| At3g49100 | + | + | + |   |
| At3g49120 | + | + | + |   |
| At3g49140 | + | + | + |   |
| At3g49160 | + | + | + |   |
| At3g49180 | + | + | + |   |
| At3g49210 |   | + |   |   |
| At3g49220 | + | + | + |   |
| At3g49240 | + | + | + |   |
| At3g49250 | + | + | + |   |
| At3g49260 | + | + | + |   |
| At3g49270 | + | + | + |   |
| At3g49300 |   | + | + |   |
| At3g49310 | + | + | + |   |
| At3g49320 | + | + | + |   |
| At3g49350 | + | + | + |   |
| At3g49360 | + | + | + |   |
| At3g49370 | + | + | + |   |
| At3g49390 | + | + | + |   |
| At3g49430 | + | + | + |   |
| At3g49470 | + | + | + |   |
| At3g49490 | + | + | + |   |
| At3g49500 | + | + | + |   |

|           |   |   |   |   |
|-----------|---|---|---|---|
| At3g49530 | + | + | + |   |
| At3g49560 | + | + | + |   |
| At3g49590 | + | + | + |   |
| At3g49600 | + | + | + |   |
| At3g49640 | + | + | + |   |
| At3g49650 | + | + | + |   |
| At3g49670 | + | + | + |   |
| At3g49680 | + | + | + |   |
| At3g49690 | + |   |   |   |
| At3g49710 | + | + | + |   |
| At3g49720 | + | + | + |   |
| At3g49730 | + | + | + |   |
| At3g49740 |   | + |   |   |
| At3g49750 | + |   | + |   |
| At3g49780 | + | + | + |   |
| At3g49790 | + | + |   |   |
| At3g49810 | + | + | + |   |
| At3g49850 | + | + | + |   |
| At3g49870 | + | + | + |   |
| At3g49880 | + |   |   |   |
| At3g49890 | + | + | + |   |
| At3g49900 | + | + | + | + |
| At3g49910 | + | + | + |   |
| At3g49930 | + |   |   |   |
| At3g49940 | + | + | + |   |
| At3g49990 | + | + | + |   |
| At3g50000 | + | + | + |   |
| At3g50050 | + | + | + |   |
| At3g50060 | + | + | + |   |
| At3g50070 | + | + | + |   |
| At3g50080 | + | + | + |   |
| At3g50110 | + | + | + |   |
| At3g50120 | + |   |   |   |
| At3g50210 | + | + | + |   |
| At3g50240 | + | + | + |   |
| At3g50270 | + | + | + |   |
| At3g50280 | + | + | + |   |
| At3g50310 |   | + |   | + |
| At3g50340 | + | + | + |   |
| At3g50350 | + | + | + |   |
| At3g50360 | + | + | + |   |
| At3g50370 | + | + | + |   |
| At3g50380 | + | + | + |   |
| At3g50410 | + | + | + |   |
| At3g50430 | + | + | + |   |
| At3g50440 | + |   |   |   |
| At3g50500 | + | + | + |   |
| At3g50520 | + | + | + |   |
| At3g50530 | + | + | + |   |
| At3g50550 | + | + | + |   |
| At3g50560 |   |   | + |   |
| At3g50570 | + |   |   | + |

|           |   |   |   |   |
|-----------|---|---|---|---|
| At3g50580 | + |   |   | + |
| At3g50590 | + | + | + |   |
| At3g50600 | + | + | + |   |
| At3g50620 | + | + | + |   |
| At3g50630 | + | + | + |   |
| At3g50660 | + | + | + |   |
| At3g50670 | + | + | + |   |
| At3g50685 | + | + | + |   |
| At3g50690 | + | + | + |   |
| At3g50700 | + | + | + |   |
| At3g50760 |   | + |   |   |
| At3g50770 |   | + | + |   |
| At3g50780 | + | + | + |   |
| At3g50790 | + | + | + |   |
| At3g50810 | + | + | + |   |
| At3g50820 | + | + | + |   |
| At3g50830 | + | + | + |   |
| At3g50850 |   | + |   |   |
| At3g50860 | + | + | + |   |
| At3g50880 | + | + | + |   |
| At3g50890 | + | + | + | + |
| At3g50900 |   | + | + |   |
| At3g50910 | + | + | + |   |
| At3g50920 | + | + | + |   |
| At3g50930 | + | + |   |   |
| At3g50950 | + | + | + |   |
| At3g50960 | + | + | + |   |
| At3g51000 | + | + | + |   |
| At3g51010 | + | + | + |   |
| At3g51030 | + | + | + |   |
| At3g51040 | + | + | + |   |
| At3g51050 | + | + | + |   |
| At3g51070 | + |   |   | + |
| At3g51090 | + | + | + |   |
| At3g51100 | + | + | + |   |
| At3g51110 |   | + | + |   |
| At3g51120 | + | + | + |   |
| At3g51130 | + | + | + |   |
| At3g51140 | + | + | + |   |
| At3g51150 | + | + | + |   |
| At3g51160 | + | + | + |   |
| At3g51180 | + | + | + |   |
| At3g51240 | + | + | + |   |
| At3g51250 | + | + | + |   |
| At3g51260 | + | + | + |   |
| At3g51270 | + | + | + |   |
| At3g51280 | + | + | + |   |
| At3g51290 | + | + | + |   |
| At3g51300 | + | + | + |   |
| At3g51310 | + | + | + |   |
| At3g51320 | + | + |   |   |
| At3g51370 | + | + | + |   |

|           |   |   |   |   |
|-----------|---|---|---|---|
| At3g51390 | + | + | + |   |
| At3g51400 |   | + |   |   |
| At3g51420 | + | + | + |   |
| At3g51430 | + | + | + |   |
| At3g51440 |   | + | + |   |
| At3g51450 | + | + | + |   |
| At3g51460 | + | + | + |   |
| At3g51470 | + | + | + |   |
| At3g51490 | + |   |   | + |
| At3g51500 | + | + | + |   |
| At3g51510 | + | + | + |   |
| At3g51520 | + | + | + |   |
| At3g51530 | + | + | + |   |
| At3g51550 | + | + | + |   |
| At3g51580 | + | + | + |   |
| At3g51590 | + |   |   | + |
| At3g51600 | + | + | + |   |
| At3g51610 | + | + | + |   |
| At3g51620 | + | + | + |   |
| At3g51630 | + | + | + |   |
| At3g51640 | + | + | + |   |
| At3g51660 |   | + |   |   |
| At3g51670 | + | + | + |   |
| At3g51720 | + | + | + |   |
| At3g51730 | + | + | + |   |
| At3g51740 | + | + | + |   |
| At3g51770 | + | + | + |   |
| At3g51780 | + | + | + |   |
| At3g51790 | + | + | + |   |
| At3g51800 | + | + | + |   |
| At3g51820 | + | + | + |   |
| At3g51830 | + | + | + |   |
| At3g51840 | + | + | + |   |
| At3g51850 | + | + | + |   |
| At3g51860 | + | + | + |   |
| At3g51870 | + | + | + |   |
| At3g51880 | + | + | + |   |
| At3g51890 | + | + |   |   |
| At3g51895 | + | + | + |   |
| At3g51920 | + | + | + |   |
| At3g51940 | + |   | + |   |
| At3g51950 | + | + | + |   |
| At3g51990 | + | + | + |   |
| At3g52000 | + | + | + | + |
| At3g52030 | + | + | + |   |
| At3g52040 | + | + | + |   |
| At3g52060 | + | + | + |   |
| At3g52070 | + | + | + |   |
| At3g52090 | + | + | + |   |
| At3g52100 | + |   |   | + |
| At3g52110 | + | + | + |   |
| At3g52120 | + | + | + |   |

|           |   |   |   |   |
|-----------|---|---|---|---|
| At3g52130 | + |   |   | + |
| At3g52140 | + | + | + |   |
| At3g52150 | + | + | + |   |
| At3g52155 | + | + | + |   |
| At3g52160 | + |   |   | + |
| At3g52170 | + | + | + |   |
| At3g52180 | + | + | + |   |
| At3g52190 | + | + | + |   |
| At3g52200 | + | + | + |   |
| At3g52220 | + | + | + |   |
| At3g52230 | + | + | + |   |
| At3g52240 | + | + | + |   |
| At3g52260 | + | + | + |   |
| At3g52270 | + |   |   | + |
| At3g52290 | + | + | + |   |
| At3g52300 | + | + | + |   |
| At3g52340 | + | + | + |   |
| At3g52360 | + | + | + |   |
| At3g52370 | + | + | + |   |
| At3g52380 | + | + | + |   |
| At3g52390 | + | + | + |   |
| At3g52400 | + | + |   |   |
| At3g52420 | + | + | + |   |
| At3g52460 | + | + | + |   |
| At3g52470 | + | + | + |   |
| At3g52480 | + |   |   |   |
| At3g52490 | + | + | + |   |
| At3g52500 | + | + | + |   |
| At3g52560 | + | + | + |   |
| At3g52570 | + | + |   |   |
| At3g52580 | + | + | + |   |
| At3g52590 | + | + | + |   |
| At3g52600 | + | + | + | + |
| At3g52610 | + | + | + |   |
| At3g52620 | + | + |   | + |
| At3g52640 | + | + | + |   |
| At3g52650 | + | + | + |   |
| At3g52660 | + | + | + |   |
| At3g52710 | + | + |   |   |
| At3g52720 | + | + | + |   |
| At3g52730 | + | + | + |   |
| At3g52740 | + | + | + |   |
| At3g52750 | + | + | + |   |
| At3g52760 | + | + | + |   |
| At3g52770 |   |   | + |   |
| At3g52780 | + |   | + | + |
| At3g52800 | + | + | + |   |
| At3g52810 | + |   |   | + |
| At3g52820 | + | + | + |   |
| At3g52840 | + | + | + |   |
| At3g52850 | + | + | + |   |
| At3g52860 | + | + | + |   |

|           |   |   |   |   |
|-----------|---|---|---|---|
| At3g52870 | + | + | + |   |
| At3g52880 | + | + | + |   |
| At3g52890 | + | + | + |   |
| At3g52900 | + | + | + |   |
| At3g52910 | + | + | + |   |
| At3g52920 | + | + | + |   |
| At3g52930 | + | + | + |   |
| At3g52940 | + | + | + |   |
| At3g52950 | + | + | + |   |
| At3g52960 | + | + | + |   |
| At3g53000 | + | + |   |   |
| At3g53020 | + | + | + |   |
| At3g53030 | + | + | + |   |
| At3g53070 | + |   |   |   |
| At3g53080 | + |   |   | + |
| At3g53090 | + | + | + |   |
| At3g53100 | + | + | + |   |
| At3g53110 | + | + | + |   |
| At3g53130 | + | + | + |   |
| At3g53140 | + | + | + | + |
| At3g53170 | + |   |   |   |
| At3g53180 | + | + | + |   |
| At3g53190 | + | + | + |   |
| At3g53210 | + | + | + |   |
| At3g53220 | + | + |   |   |
| At3g53230 | + | + | + |   |
| At3g53260 | + | + | + |   |
| At3g53270 | + | + | + |   |
| At3g53300 |   | + |   | + |
| At3g53310 | + | + | + |   |
| At3g53320 | + |   |   |   |
| At3g53340 | + | + | + |   |
| At3g53350 | + | + | + |   |
| At3g53360 | + |   |   |   |
| At3g53370 | + | + | + |   |
| At3g53390 | + | + | + |   |
| At3g53400 | + | + | + |   |
| At3g53410 | + | + | + |   |
| At3g53420 | + | + | + |   |
| At3g53430 | + | + | + |   |
| At3g53440 | + | + | + |   |
| At3g53450 |   | + | + |   |
| At3g53460 | + | + | + |   |
| At3g53470 | + | + | + |   |
| At3g53480 | + |   |   |   |
| At3g53500 | + | + | + |   |
| At3g53510 | + |   |   |   |
| At3g53520 | + | + | + |   |
| At3g53540 | + | + | + |   |
| At3g53560 | + | + | + |   |
| At3g53570 | + | + | + |   |
| At3g53580 | + | + | + |   |

|           |   |   |   |
|-----------|---|---|---|
| At3g53610 | + | + | + |
| At3g53620 | + | + | + |
| At3g53630 | + | + | + |
| At3g53650 |   |   | + |
| At3g53660 | + | + | + |
| At3g53670 | + | + | + |
| At3g53680 | + | + | + |
| At3g53690 | + | + |   |
| At3g53700 | + | + | + |
| At3g53710 | + |   | + |
| At3g53720 | + |   |   |
| At3g53730 | + | + | + |
| At3g53740 | + | + | + |
| At3g53760 | + | + | + |
| At3g53780 | + | + | + |
| At3g53800 | + |   |   |
| At3g53810 |   | + |   |
| At3g53880 | + | + | + |
| At3g53890 | + | + | + |
| At3g53900 | + | + | + |
| At3g53920 | + | + | + |
| At3g53930 | + | + | + |
| At3g53940 | + | + | + |
| At3g53950 | + | + | + |
| At3g53960 | + | + | + |
| At3g53970 | + | + | + |
| At3g53980 |   |   | + |
| At3g53990 | + | + | + |
| At3g54000 | + | + | + |
| At3g54010 | + | + | + |
| At3g54030 | + | + | + |
| At3g54040 | + |   | + |
| At3g54050 | + | + | + |
| At3g54080 | + | + | + |
| At3g54090 | + | + | + |
| At3g54100 | + | + | + |
| At3g54110 | + | + | + |
| At3g54120 | + | + | + |
| At3g54130 | + | + | + |
| At3g54140 | + | + | + |
| At3g54150 |   | + |   |
| At3g54170 | + | + | + |
| At3g54190 | + | + | + |
| At3g54200 | + | + | + |
| At3g54210 | + | + | + |
| At3g54220 | + | + | + |
| At3g54230 | + | + | + |
| At3g54240 |   | + | + |
| At3g54250 | + | + | + |
| At3g54260 | + | + | + |
| At3g54280 | + | + | + |
| At3g54290 | + | + | + |



|           |   |   |   |   |
|-----------|---|---|---|---|
| At3g54300 | + | + | + |   |
| At3g54330 | + | + | + |   |
| At3g54340 | + | + | + | + |
| At3g54350 | + | + | + |   |
| At3g54360 | + | + | + |   |
| At3g54380 | + | + | + |   |
| At3g54380 | + | + | + |   |
| At3g54390 | + | + | + |   |
| At3g54400 | + | + | + |   |
| At3g54420 |   |   | + |   |
| At3g54430 | + | + | + |   |
| At3g54480 | + | + | + |   |
| At3g54500 | + | + | + |   |
| At3g54510 | + | + |   |   |
| At3g54540 | + | + | + |   |
| At3g54560 | + | + | + |   |
| At3g54590 |   | + | + |   |
| At3g54610 | + | + |   |   |
| At3g54620 | + | + | + |   |
| At3g54630 | + |   | + | + |
| At3g54640 | + | + | + |   |
| At3g54650 | + | + | + |   |
| At3g54660 | + | + | + |   |
| At3g54670 | + | + | + |   |
| At3g54680 | + |   | + |   |
| At3g54690 | + | + | + |   |
| At3g54720 | + | + | + |   |
| At3g54750 | + | + | + |   |
| At3g54770 |   |   | + |   |
| At3g54790 | + | + | + |   |
| At3g54800 | + | + | + |   |
| At3g54810 | + | + | + |   |
| At3g54820 | + | + | + |   |
| At3g54840 | + | + | + |   |
| At3g54850 | + | + | + |   |
| At3g54860 | + | + | + |   |
| At3g54870 | + | + | + |   |
| At3g54890 | + | + | + |   |
| At3g54900 | + | + | + |   |
| At3g54920 | + | + | + |   |
| At3g54930 | + | + | + |   |
| At3g54940 |   | + |   | + |
| At3g54950 | + | + | + |   |
| At3g54960 | + | + | + |   |
| At3g54970 | + | + | + |   |
| At3g54980 | + | + | + |   |
| At3g54990 | + | + |   |   |
| At3g55000 | + | + | + |   |
| At3g55005 | + | + | + |   |
| At3g55010 | + | + | + |   |
| At3g55020 | + | + | + |   |
| At3g55030 | + | + | + |   |

|           |   |   |   |   |
|-----------|---|---|---|---|
| At3g55040 | + | + | + |   |
| At3g55050 | + | + | + |   |
| At3g55060 | + | + | + |   |
| At3g55070 | + | + | + |   |
| At3g55080 | + | + | + |   |
| At3g55090 | + | + |   |   |
| At3g55100 | + |   |   | + |
| At3g55110 | + | + | + |   |
| At3g55120 | + | + | + |   |
| At3g55130 | + | + |   |   |
| At3g55140 | + | + | + |   |
| At3g55150 | + |   |   |   |
| At3g55170 | + | + | + |   |
| At3g55180 | + | + |   | + |
| At3g55190 | + |   |   | + |
| At3g55200 | + | + | + |   |
| At3g55250 | + | + | + |   |
| At3g55260 | + | + | + |   |
| At3g55270 | + | + | + |   |
| At3g55280 | + | + | + |   |
| At3g55310 | + | + | + |   |
| At3g55320 | + | + | + |   |
| At3g55330 | + | + | + |   |
| At3g55350 | + | + | + |   |
| At3g55360 | + | + | + |   |
| At3g55380 | + | + | + |   |
| At3g55390 | + | + | + |   |
| At3g55400 | + | + | + |   |
| At3g55410 | + | + | + |   |
| At3g55420 | + | + | + |   |
| At3g55430 | + | + | + |   |
| At3g55440 | + | + | + |   |
| At3g55450 | + | + | + |   |
| At3g55460 | + | + | + |   |
| At3g55470 | + | + | + |   |
| At3g55480 | + | + | + |   |
| At3g55510 | + | + | + |   |
| At3g55520 | + | + | + |   |
| At3g55530 | + | + | + |   |
| At3g55600 | + | + | + |   |
| At3g55605 | + | + | + |   |
| At3g55610 | + | + | + |   |
| At3g55620 | + | + | + |   |
| At3g55630 | + | + | + |   |
| At3g55640 | + | + | + |   |
| At3g55690 | + | + | + |   |
| At3g55700 | + |   | + |   |
| At3g55710 | + | + | + |   |
| At3g55730 | + | + | + |   |
| At3g55740 | + | + | + |   |
| At3g55760 | + | + | + |   |
| At3g55770 | + | + | + |   |

|           |   |   |   |   |
|-----------|---|---|---|---|
| At3g55800 | + | + | + |   |
| At3g55820 | + | + | + |   |
| At3g55830 | + | + | + |   |
| At3g55850 | + | + | + |   |
| At3g55870 |   | + |   | + |
| At3g55890 | + |   | + |   |
| At3g55910 | + | + | + |   |
| At3g55920 | + | + | + |   |
| At3g55940 | + |   |   |   |
| At3g55950 | + | + | + |   |
| At3g55960 | + | + | + |   |
| At3g55970 | + |   | + |   |
| At3g55980 | + | + | + |   |
| At3g56010 | + | + | + |   |
| At3g56040 | + | + | + |   |
| At3g56050 | + | + | + |   |
| At3g56060 | + | + |   |   |
| At3g56070 | + | + | + |   |
| At3g56080 | + | + |   |   |
| At3g56090 | + | + | + |   |
| At3g56100 | + | + | + |   |
| At3g56110 | + | + | + |   |
| At3g56120 | + | + | + |   |
| At3g56130 | + | + | + |   |
| At3g56140 | + | + | + |   |
| At3g56150 | + | + | + |   |
| At3g56160 | + |   |   |   |
| At3g56170 | + | + | + |   |
| At3g56190 | + | + | + |   |
| At3g56200 | + | + | + |   |
| At3g56230 | + |   | + |   |
| At3g56240 | + | + | + |   |
| At3g56260 | + |   |   |   |
| At3g56270 | + | + | + |   |
| At3g56290 | + | + | + |   |
| At3g56300 | + |   |   | + |
| At3g56310 | + | + | + |   |
| At3g56330 | + | + | + |   |
| At3g56340 | + | + | + |   |
| At3g56360 | + | + | + |   |
| At3g56370 | + | + | + |   |
| At3g56400 | + | + | + |   |
| At3g56430 | + | + | + |   |
| At3g56460 | + | + | + |   |
| At3g56480 | + | + | + |   |
| At3g56490 | + | + | + |   |
| At3g56510 | + | + | + |   |
| At3g56580 | + |   | + |   |
| At3g56585 | + | + | + |   |
| At3g56600 | + | + |   | + |
| At3g56610 |   | + |   | + |
| At3g56620 | + |   |   |   |

|           |   |   |   |   |
|-----------|---|---|---|---|
| At3g56630 | + | + | + |   |
| At3g56640 | + | + | + |   |
| At3g56650 | + | + | + |   |
| At3g56680 | + | + | + |   |
| At3g56690 | + | + | + |   |
| At3g56710 | + | + | + |   |
| At3g56720 | + | + | + |   |
| At3g56730 | + | + | + |   |
| At3g56740 | + | + | + |   |
| At3g56750 |   | + | + |   |
| At3g56760 | + | + | + |   |
| At3g56800 | + | + | + |   |
| At3g56810 | + | + | + |   |
| At3g56820 | + | + | + |   |
| At3g56830 | + | + | + |   |
| At3g56840 | + | + | + |   |
| At3g56850 | + | + | + |   |
| At3g56860 | + | + | + |   |
| At3g56870 | + | + | + |   |
| At3g56880 | + | + | + |   |
| At3g56900 | + | + | + |   |
| At3g56910 | + | + | + |   |
| At3g56930 | + | + | + |   |
| At3g56940 | + | + | + |   |
| At3g56950 | + | + | + |   |
| At3g56960 | + | + | + |   |
| At3g56990 | + | + | + |   |
| At3g57000 | + | + | + |   |
| At3g57020 | + | + | + |   |
| At3g57030 | + | + | + |   |
| At3g57040 | + | + | + |   |
| At3g57050 | + | + | + |   |
| At3g57060 | + | + |   |   |
| At3g57070 | + | + | + |   |
| At3g57080 | + | + | + |   |
| At3g57090 | + | + | + |   |
| At3g57120 | + | + | + |   |
| At3g57140 | + | + |   | + |
| At3g57150 | + | + | + |   |
| At3g57165 |   |   | + |   |
| At3g57170 | + | + | + |   |
| At3g57180 | + | + | + |   |
| At3g57190 | + | + | + |   |
| At3g57220 | + |   | + |   |
| At3g57230 | + | + | + |   |
| At3g57240 |   |   | + |   |
| At3g57260 |   | + | + |   |
| At3g57280 | + | + | + |   |
| At3g57290 | + | + | + |   |
| At3g57300 | + | + | + |   |
| At3g57320 | + | + | + |   |
| At3g57330 | + | + | + |   |

|           |   |   |   |   |
|-----------|---|---|---|---|
| At3g57340 | + | + | + |   |
| At3g57360 | + | + | + |   |
| At3g57390 | + | + | + |   |
| At3g57410 | + | + | + |   |
| At3g57420 | + | + | + |   |
| At3g57430 |   |   | + |   |
| At3g57440 | + |   |   |   |
| At3g57450 | + | + | + |   |
| At3g57470 | + | + | + |   |
| At3g57480 | + | + | + |   |
| At3g57490 | + | + | + |   |
| At3g57510 | + |   | + |   |
| At3g57520 | + | + | + |   |
| At3g57530 | + | + | + |   |
| At3g57550 | + | + | + |   |
| At3g57560 | + | + | + |   |
| At3g57570 | + | + | + |   |
| At3g57600 | + | + |   |   |
| At3g57610 | + | + | + |   |
| At3g57620 | + |   |   | + |
| At3g57630 | + | + | + |   |
| At3g57650 | + | + | + |   |
| At3g57660 | + | + | + |   |
| At3g57670 | + | + |   | + |
| At3g57680 | + | + | + |   |
| At3g57690 | + | + | + |   |
| At3g57700 | + | + |   |   |
| At3g57710 | + | + | + |   |
| At3g57750 | + | + | + |   |
| At3g57780 | + |   | + |   |
| At3g57785 | + | + | + |   |
| At3g57790 | + | + | + |   |
| At3g57795 | + | + | + |   |
| At3g57810 | + | + | + |   |
| At3g57820 | + |   |   |   |
| At3g57830 | + | + | + |   |
| At3g57840 |   | + |   | + |
| At3g57860 | + | + | + |   |
| At3g57870 | + | + | + |   |
| At3g57880 | + | + | + |   |
| At3g57890 | + | + | + |   |
| At3g57920 | + | + | + |   |
| At3g57930 | + | + | + |   |
| At3g57940 | + | + | + |   |
| At3g57950 | + | + |   |   |
| At3g57980 | + |   | + |   |
| At3g57990 | + | + | + |   |
| At3g58000 | + |   |   |   |
| At3g58010 | + | + | + |   |
| At3g58040 | + | + | + |   |
| At3g58050 | + | + | + |   |
| At3g58060 | + |   |   | + |

|           |   |   |   |   |
|-----------|---|---|---|---|
| At3g58090 | + | + | + |   |
| At3g58100 | + | + | + |   |
| At3g58120 | + |   | + |   |
| At3g58140 | + | + | + |   |
| At3g58160 | + |   |   | + |
| At3g58170 | + | + | + |   |
| At3g58180 | + | + | + |   |
| At3g58200 | + | + | + | + |
| At3g58290 | + |   |   | + |
| At3g58460 | + | + | + |   |
| At3g58470 | + | + | + |   |
| At3g58510 | + | + | + |   |
| At3g58530 | + | + | + |   |
| At3g58560 | + | + | + |   |
| At3g58570 | + | + | + |   |
| At3g58580 | + | + | + |   |
| At3g58600 | + | + | + |   |
| At3g58610 | + | + | + |   |
| At3g58620 | + | + | + |   |
| At3g58630 | + |   |   |   |
| At3g58640 | + | + | + |   |
| At3g58650 |   | + | + |   |
| At3g58660 | + | + | + |   |
| At3g58670 | + | + | + |   |
| At3g58680 | + | + | + |   |
| At3g58690 | + | + | + |   |
| At3g58700 | + | + | + |   |
| At3g58710 |   |   | + |   |
| At3g58730 | + | + | + |   |
| At3g58750 | + | + | + |   |
| At3g58760 | + | + | + |   |
| At3g58770 | + |   |   |   |
| At3g58780 | + | + | + | + |
| At3g58790 | + | + | + |   |
| At3g58800 | + | + | + |   |
| At3g58810 | + | + | + |   |
| At3g58830 | + | + | + |   |
| At3g58840 | + | + | + |   |
| At3g58970 | + | + | + |   |
| At3g58980 | + | + | + |   |
| At3g58990 | + | + | + |   |
| At3g59000 | + | + | + |   |
| At3g59010 | + | + | + |   |
| At3g59020 | + | + | + |   |
| At3g59030 | + | + | + |   |
| At3g59040 | + | + | + |   |
| At3g59050 | + | + | + |   |
| At3g59060 | + | + | + |   |
| At3g59080 | + | + | + |   |
| At3g59090 | + | + | + |   |
| At3g59100 | + | + | + |   |
| At3g59110 | + | + | + |   |

|           |   |   |   |   |
|-----------|---|---|---|---|
| At3g59140 | + | + |   |   |
| At3g59220 | + | + | + |   |
| At3g59280 | + | + | + |   |
| At3g59290 | + | + | + |   |
| At3g59300 | + | + | + |   |
| At3g59310 | + | + | + |   |
| At3g59350 | + | + | + |   |
| At3g59360 | + | + | + |   |
| At3g59380 | + | + | + |   |
| At3g59390 | + | + | + |   |
| At3g59400 | + | + | + |   |
| At3g59410 | + | + | + |   |
| At3g59420 | + | + | + | + |
| At3g59430 | + | + | + |   |
| At3g59470 | + | + | + |   |
| At3g59480 | + |   | + |   |
| At3g59490 | + | + | + |   |
| At3g59530 | + | + | + |   |
| At3g59540 | + | + | + |   |
| At3g59550 | + | + | + |   |
| At3g59560 | + | + | + |   |
| At3g59580 | + | + |   |   |
| At3g59630 | + | + | + |   |
| At3g59640 | + | + | + |   |
| At3g59650 | + | + | + |   |
| At3g59660 | + | + | + |   |
| At3g59670 | + | + | + |   |
| At3g59680 |   |   | + |   |
| At3g59690 | + | + | + |   |
| At3g59760 | + | + | + |   |
| At3g59770 | + | + | + |   |
| At3g59780 | + | + | + |   |
| At3g59800 | + | + | + |   |
| At3g59810 | + | + | + |   |
| At3g59820 | + | + | + |   |
| At3g59830 | + | + |   | + |
| At3g59840 | + | + | + |   |
| At3g59845 | + | + | + | + |
| At3g59850 |   | + |   | + |
| At3g59870 | + | + | + |   |
| At3g59900 |   | + | + |   |
| At3g59910 | + | + | + |   |
| At3g59920 | + | + | + |   |
| At3g59940 | + | + | + |   |
| At3g59950 | + | + | + |   |
| At3g59980 | + | + | + |   |
| At3g59990 | + | + | + |   |
| At3g60010 | + |   |   |   |
| At3g60030 | + | + | + |   |
| At3g60040 | + | + | + |   |
| At3g60070 | + | + | + |   |
| At3g60080 | + | + | + |   |

|           |   |   |   |
|-----------|---|---|---|
| At3g60100 | + |   | + |
| At3g60110 | + | + | + |
| At3g60130 | + | + | + |
| At3g60140 |   | + | + |
| At3g60160 | + | + | + |
| At3g60180 | + | + | + |
| At3g60190 | + | + | + |
| At3g60200 | + |   | + |
| At3g60210 | + | + | + |
| At3g60220 | + | + | + |
| At3g60240 | + | + | + |
| At3g60245 | + | + | + |
| At3g60250 | + | + | + |
| At3g60260 | + | + | + |
| At3g60290 | + | + | + |
| At3g60300 | + | + | + |
| At3g60310 | + | + | + |
| At3g60320 | + | + | + |
| At3g60330 | + |   |   |
| At3g60340 | + | + | + |
| At3g60350 | + | + | + |
| At3g60360 | + | + | + |
| At3g60370 | + | + | + |
| At3g60380 | + | + | + |
| At3g60390 | + | + | + |
| At3g60400 |   | + |   |
| At3g60410 | + |   |   |
| At3g60420 |   | + | + |
| At3g60440 | + |   | + |
| At3g60450 | + | + | + |
| At3g60480 | + | + | + |
| At3g60510 | + | + | + |
| At3g60520 | + | + | + |
| At3g60530 | + | + | + |
| At3g60540 | + | + | + |
| At3g60550 | + |   |   |
| At3g60570 | + | + | + |
| At3g60580 | + |   |   |
| At3g60590 | + | + | + |
| At3g60600 | + | + | + |
| At3g60620 | + |   | + |
| At3g60630 | + | + | + |
| At3g60640 | + | + | + |
| At3g60660 | + | + | + |
| At3g60680 | + | + | + |
| At3g60690 | + | + | + |
| At3g60700 |   |   | + |
| At3g60720 |   | + |   |
| At3g60740 | + | + | + |
| At3g60750 | + | + | + |
| At3g60770 | + | + | + |
| At3g60780 | + | + | + |



|           |   |   |   |
|-----------|---|---|---|
| At3g60800 | + | + | + |
| At3g60810 | + | + | + |
| At3g60820 | + | + | + |
| At3g60830 | + | + | + |
| At3g60840 | + | + | + |
| At3g60850 | + | + | + |
| At3g60860 | + | + | + |
| At3g60880 | + | + | + |
| At3g60900 | + | + | + |
| At3g60910 | + | + | + |
| At3g60980 | + | + | + |
| At3g61010 |   | + |   |
| At3g61020 | + | + | + |
| At3g61050 | + | + | + |
| At3g61060 | + | + | + |
| At3g61070 | + | + | + |
| At3g61080 | + | + | + |
| At3g61100 | + | + | + |
| At3g61110 | + | + | + |
| At3g61120 | + | + |   |
| At3g61130 | + | + | + |
| At3g61140 | + | + | + |
| At3g61150 | + | + | + |
| At3g61160 | + | + | + |
| At3g61170 | + | + | + |
| At3g61180 | + | + | + |
| At3g61190 | + | + |   |
| At3g61200 | + | + | + |
| At3g61210 | + | + | + |
| At3g61220 | + | + | + |
| At3g61230 | + | + | + |
| At3g61240 | + | + | + |
| At3g61250 | + | + | + |
| At3g61260 | + | + | + |
| At3g61310 | + | + | + |
| At3g61340 | + |   |   |
| At3g61350 | + | + | + |
| At3g61360 | + | + | + |
| At3g61380 | + | + | + |
| At3g61430 | + | + | + |
| At3g61440 | + | + | + |
| At3g61460 | + | + | + |
| At3g61470 | + | + | + |
| At3g61490 | + | + | + |
| At3g61530 | + | + | + |
| At3g61540 | + | + | + |
| At3g61550 | + | + | + |
| At3g61570 | + | + | + |
| At3g61580 | + | + | + |
| At3g61590 | + | + | + |
| At3g61600 | + | + | + |
| At3g61610 | + | + | + |

|           |   |   |   |   |
|-----------|---|---|---|---|
| At3g61620 | + | + | + |   |
| At3g61630 | + |   |   |   |
| At3g61640 | + | + | + |   |
| At3g61650 | + | + | + |   |
| At3g61670 | + | + | + |   |
| At3g61690 | + | + | + |   |
| At3g61700 | + | + | + |   |
| At3g61710 | + | + | + |   |
| At3g61740 | + | + | + |   |
| At3g61760 | + |   |   |   |
| At3g61770 | + | + | + |   |
| At3g61780 | + |   | + |   |
| At3g61790 | + | + | + |   |
| At3g61800 | + |   |   |   |
| At3g61820 | + | + | + |   |
| At3g61830 | + | + | + |   |
| At3g61840 | + |   |   |   |
| At3g61850 | + | + | + |   |
| At3g61860 | + | + | + |   |
| At3g61870 | + | + | + |   |
| At3g61880 |   | + |   | + |
| At3g61890 | + | + | + |   |
| At3g61930 | + | + | + |   |
| At3g61950 | + | + | + |   |
| At3g61960 | + | + | + |   |
| At3g61970 | + | + | + |   |
| At3g61980 | + | + | + |   |
| At3g62000 |   |   | + |   |
| At3g62010 | + | + | + |   |
| At3g62020 | + | + | + |   |
| At3g62030 | + | + | + |   |
| At3g62040 | + |   |   |   |
| At3g62060 | + | + | + |   |
| At3g62080 | + | + |   |   |
| At3g62100 | + |   |   |   |
| At3g62110 | + | + | + |   |
| At3g62120 | + | + | + |   |
| At3g62130 | + | + | + |   |
| At3g62140 | + | + | + |   |
| At3g62150 |   | + |   |   |
| At3g62160 | + | + | + |   |
| At3g62170 | + | + | + | + |
| At3g62180 | + | + | + | + |
| At3g62190 | + | + | + |   |
| At3g62220 | + | + | + |   |
| At3g62230 | + | + | + | + |
| At3g62240 | + | + | + |   |
| At3g62260 | + | + | + |   |
| At3g62270 | + | + |   |   |
| At3g62290 | + | + | + |   |
| At3g62300 | + | + | + |   |
| At3g62310 | + | + | + |   |

|           |   |   |   |   |
|-----------|---|---|---|---|
| At3g62330 | + | + | + |   |
| At3g62360 | + | + | + |   |
| At3g62370 | + | + | + |   |
| At3g62390 | + | + | + |   |
| At3g62400 | + | + | + |   |
| At3g62410 | + | + | + |   |
| At3g62420 | + | + | + |   |
| At3g62430 | + | + | + |   |
| At3g62450 | + | + | + |   |
| At3g62470 | + | + | + |   |
| At3g62530 | + | + | + |   |
| At3g62550 | + | + |   |   |
| At3g62560 | + | + | + |   |
| At3g62580 | + | + | + |   |
| At3g62590 | + | + | + |   |
| At3g62600 | + | + | + |   |
| At3g62610 | + | + | + | + |
| At3g62620 | + | + | + |   |
| At3g62630 | + | + | + |   |
| At3g62640 | + | + |   | + |
| At3g62650 | + | + | + |   |
| At3g62660 | + | + | + |   |
| At3g62700 | + | + | + |   |
| At3g62710 | + | + | + | + |
| At3g62720 | + | + | + |   |
| At3g62750 | + | + | + |   |
| At3g62770 | + | + | + |   |
| At3g62790 | + | + | + |   |
| At3g62800 | + | + | + |   |
| At3g62810 | + | + | + |   |
| At3g62820 | + | + | + |   |
| At3g62840 | + | + | + |   |
| At3g62860 | + | + | + |   |
| At3g62870 | + | + | + |   |
| At3g62880 | + | + | + |   |
| At3g62890 |   | + |   |   |
| At3g62910 | + | + | + |   |
| At3g62920 | + | + | + |   |
| At3g62930 |   |   | + |   |
| At3g62940 | + | + | + |   |
| At3g62960 |   | + |   | + |
| At3g62970 | + | + | + |   |
| At3g62980 | + | + | + |   |
| At3g63000 | + | + | + |   |
| At3g63010 | + | + |   |   |
| At3g63070 | + | + | + |   |
| At3g63080 | + | + | + |   |
| At3g63090 | + | + | + |   |
| At3g63120 | + | + | + |   |
| At3g63130 | + | + | + |   |
| At3g63140 | + | + | + |   |
| At3g63150 | + | + | + |   |

|           |   |   |   |   |
|-----------|---|---|---|---|
| At3g63160 | + |   | + |   |
| At3g63170 | + | + | + |   |
| At3g63180 | + | + | + |   |
| At3g63190 | + | + | + |   |
| At3g63200 | + | + | + |   |
| At3g63210 | + | + | + |   |
| At3g63220 | + | + | + |   |
| At3g63240 | + |   |   |   |
| At3g63250 | + | + | + |   |
| At3g63260 | + | + | + |   |
| At3g63270 | + | + | + |   |
| At3g63290 | + | + | + |   |
| At3g63300 | + | + | + |   |
| At3g63310 | + | + | + |   |
| At3g63380 | + |   |   |   |
| At3g63390 | + | + | + |   |
| At3g63400 | + | + | + |   |
| At3g63410 | + | + | + |   |
| At3g63420 | + | + | + |   |
| At3g63460 | + | + | + |   |
| At3g63470 |   | + |   |   |
| At3g63490 | + | + | + |   |
| At3g63500 | + | + | + |   |
| At3g63510 | + | + | + |   |
| At3g63520 | + | + | + |   |
| At3g66652 | + | + | + |   |
| At3g66658 | + | + | + |   |
| At4g00010 | + |   |   |   |
| At4g00020 | + | + | + |   |
| At4g00030 | + |   |   |   |
| At4g00040 | + | + | + |   |
| At4g00050 | + | + | + |   |
| At4g00090 | + | + | + |   |
| At4g00100 | + | + | + |   |
| At4g00110 | + | + | + |   |
| At4g00150 | + | + | + |   |
| At4g00170 | + | + | + |   |
| At4g00180 | + | + |   |   |
| At4g00200 | + | + | + |   |
| At4g00230 | + | + | + |   |
| At4g00231 | + | + | + |   |
| At4g00234 | + | + | + |   |
| At4g00238 | + | + | + |   |
| At4g00270 | + | + | + |   |
| At4g00300 | + | + | + |   |
| At4g00320 | + |   |   | + |
| At4g00330 | + | + | + |   |
| At4g00335 | + | + | + |   |
| At4g00350 | + | + |   | + |
| At4g00355 | + | + | + |   |
| At4g00360 | + | + | + |   |
| At4g00370 | + | + | + |   |

|           |   |   |   |   |
|-----------|---|---|---|---|
| At4g00390 | + |   | + | + |
| At4g00400 | + | + | + |   |
| At4g00410 | + | + | + |   |
| At4g00420 | + | + | + |   |
| At4g00430 | + | + | + |   |
| At4g00440 | + | + | + |   |
| At4g00450 | + | + | + |   |
| At4g00460 | + | + |   |   |
| At4g00480 | + | + | + |   |
| At4g00490 | + | + | + |   |
| At4g00500 | + | + | + |   |
| At4g00520 | + | + | + |   |
| At4g00530 | + | + | + |   |
| At4g00550 | + | + | + |   |
| At4g00570 | + | + | + |   |
| At4g00585 | + | + | + |   |
| At4g00590 | + | + | + |   |
| At4g00600 | + | + | + |   |
| At4g00630 | + | + | + |   |
| At4g00640 | + | + | + |   |
| At4g00660 | + | + | + |   |
| At4g00670 |   |   | + |   |
| At4g00700 |   | + |   |   |
| At4g00710 | + | + | + |   |
| At4g00720 | + | + | + |   |
| At4g00730 | + | + | + |   |
| At4g00740 | + | + | + |   |
| At4g00750 | + | + | + |   |
| At4g00755 | + | + | + |   |
| At4g00760 | + | + | + |   |
| At4g00780 | + | + | + |   |
| At4g00790 | + | + | + |   |
| At4g00800 | + |   | + |   |
| At4g00810 | + | + | + |   |
| At4g00820 | + | + | + |   |
| At4g00830 | + | + | + |   |
| At4g00840 | + | + | + |   |
| At4g00850 | + | + | + |   |
| At4g00860 | + | + | + |   |
| At4g00870 |   | + | + | + |
| At4g00895 | + | + | + |   |
| At4g00900 | + | + | + |   |
| At4g00920 | + |   |   | + |
| At4g00930 | + | + | + |   |
| At4g00940 | + | + |   |   |
| At4g00950 | + | + | + |   |
| At4g00990 | + | + |   |   |
| At4g01026 | + | + | + |   |
| At4g01040 | + | + | + |   |
| At4g01050 | + | + | + |   |
| At4g01070 | + | + | + |   |
| At4g01080 | + | + | + |   |

|           |   |   |   |   |
|-----------|---|---|---|---|
| At4g01090 | + | + | + |   |
| At4g01100 | + | + | + |   |
| At4g01120 | + | + | + |   |
| At4g01150 | + | + | + |   |
| At4g01180 | + | + |   | + |
| At4g01190 |   | + | + |   |
| At4g01210 | + | + | + |   |
| At4g01220 | + | + | + |   |
| At4g01250 | + | + | + |   |
| At4g01270 | + | + | + |   |
| At4g01280 | + | + | + |   |
| At4g01290 | + | + | + |   |
| At4g01290 | + | + | + |   |
| At4g01310 | + | + | + |   |
| At4g01320 | + | + | + |   |
| At4g01330 | + | + | + |   |
| At4g01350 | + | + | + |   |
| At4g01370 | + | + | + |   |
| At4g01400 | + | + | + |   |
| At4g01410 |   |   | + |   |
| At4g01430 | + | + | + |   |
| At4g01440 | + | + | + |   |
| At4g01450 | + | + |   |   |
| At4g01460 | + | + | + |   |
| At4g01470 | + | + |   | + |
| At4g01480 | + | + | + |   |
| At4g01500 | + |   |   |   |
| At4g01510 | + | + | + |   |
| At4g01550 | + | + | + |   |
| At4g01560 | + | + | + |   |
| At4g01570 | + | + | + |   |
| At4g01575 | + | + | + |   |
| At4g01590 | + | + | + |   |
| At4g01610 | + | + | + |   |
| At4g01640 | + |   |   |   |
| At4g01650 |   |   | + |   |
| At4g01660 | + | + | + |   |
| At4g01690 | + | + | + |   |
| At4g01710 | + | + | + |   |
| At4g01730 | + | + | + |   |
| At4g01780 | + | + | + |   |
| At4g01790 | + | + | + |   |
| At4g01800 | + | + | + |   |
| At4g01810 | + | + | + |   |
| At4g01840 | + | + |   |   |
| At4g01850 | + | + | + |   |
| At4g01870 | + | + | + |   |
| At4g01880 | + | + | + |   |
| At4g01895 | + | + | + |   |
| At4g01900 | + | + | + |   |
| At4g01940 | + | + | + |   |
| At4g01960 | + | + | + |   |

|           |   |   |   |   |
|-----------|---|---|---|---|
| At4g01970 |   | + | + |   |
| At4g01990 | + | + | + |   |
| At4g02010 | + | + | + |   |
| At4g02020 | + | + | + |   |
| At4g02030 | + | + | + |   |
| At4g02050 | + | + | + |   |
| At4g02060 | + | + | + |   |
| At4g02070 | + | + | + |   |
| At4g02075 |   | + |   |   |
| At4g02080 | + | + | + |   |
| At4g02120 | + | + | + |   |
| At4g02130 | + | + | + |   |
| At4g02140 | + |   |   | + |
| At4g02150 | + | + | + |   |
| At4g02195 | + | + | + |   |
| At4g02200 | + | + | + |   |
| At4g02210 | + | + | + |   |
| At4g02220 | + | + | + |   |
| At4g02230 | + | + | + |   |
| At4g02250 | + | + | + | + |
| At4g02260 | + | + | + |   |
| At4g02280 |   | + |   |   |
| At4g02290 | + | + | + |   |
| At4g02330 | + | + | + |   |
| At4g02340 | + | + | + |   |
| At4g02350 | + | + | + |   |
| At4g02370 | + | + | + |   |
| At4g02380 | + | + | + |   |
| At4g02390 | + | + | + |   |
| At4g02400 | + | + | + |   |
| At4g02420 | + | + | + |   |
| At4g02430 | + | + | + |   |
| At4g02440 | + | + | + |   |
| At4g02450 | + |   | + |   |
| At4g02460 | + | + | + |   |
| At4g02470 | + | + | + |   |
| At4g02480 | + | + | + |   |
| At4g02485 | + |   | + | + |
| At4g02500 | + | + | + |   |
| At4g02510 | + | + | + |   |
| At4g02530 | + | + | + |   |
| At4g02540 |   |   | + |   |
| At4g02560 | + | + | + |   |
| At4g02570 | + | + | + |   |
| At4g02580 | + | + | + |   |
| At4g02590 | + | + | + |   |
| At4g02600 | + | + | + |   |
| At4g02610 | + | + | + |   |
| At4g02620 | + | + | + |   |
| At4g02630 | + | + | + |   |
| At4g02640 | + | + | + |   |
| At4g02650 | + | + | + | + |

|           |   |   |   |   |
|-----------|---|---|---|---|
| At4g02670 |   |   | + | + |
| At4g02680 | + | + | + |   |
| At4g02700 | + |   |   |   |
| At4g02710 | + | + | + |   |
| At4g02720 | + | + | + |   |
| At4g02730 | + | + | + |   |
| At4g02750 | + |   |   |   |
| At4g02770 | + | + | + |   |
| At4g02790 | + | + | + |   |
| At4g02800 | + | + | + |   |
| At4g02810 | + | + | + |   |
| At4g02820 | + | + | + |   |
| At4g02840 | + | + | + |   |
| At4g02860 | + | + | + |   |
| At4g02880 | + | + | + |   |
| At4g02890 | + | + | + |   |
| At4g02900 | + |   |   |   |
| At4g02920 | + | + | + |   |
| At4g02930 | + | + | + |   |
| At4g02940 | + | + | + |   |
| At4g02980 | + | + | + |   |
| At4g02990 | + | + | + |   |
| At4g03000 | + | + | + |   |
| At4g03010 | + |   |   |   |
| At4g03020 | + | + | + |   |
| At4g03030 | + | + | + |   |
| At4g03050 | + | + | + |   |
| At4g03070 | + | + | + |   |
| At4g03080 | + | + | + |   |
| At4g03090 | + |   | + | + |
| At4g03110 | + | + | + |   |
| At4g03120 | + | + | + |   |
| At4g03140 | + | + | + |   |
| At4g03150 | + | + | + |   |
| At4g03180 | + | + | + |   |
| At4g03190 | + | + | + |   |
| At4g03200 | + | + | + |   |
| At4g03205 | + |   |   |   |
| At4g03210 | + | + | + |   |
| At4g03240 | + | + | + |   |
| At4g03260 | + | + | + |   |
| At4g03280 | + | + | + |   |
| At4g03290 | + | + | + | + |
| At4g03320 | + | + | + |   |
| At4g03360 | + |   |   | + |
| At4g03390 | + | + | + |   |
| At4g03400 | + | + | + |   |
| At4g03410 | + | + | + |   |
| At4g03430 | + | + | + |   |
| At4g03440 |   | + |   |   |
| At4g03510 | + | + | + |   |
| At4g03520 | + | + | + |   |



|           |   |   |   |   |
|-----------|---|---|---|---|
| At4g03550 | + | + | + |   |
| At4g03560 | + | + | + |   |
| At4g03820 | + | + |   |   |
| At4g03960 | + | + | + |   |
| At4g04020 | + | + | + |   |
| At4g04040 | + | + | + |   |
| At4g04080 | + |   |   | + |
| At4g04190 | + | + | + |   |
| At4g04210 | + | + | + |   |
| At4g04320 | + | + | + |   |
| At4g04330 | + |   | + |   |
| At4g04340 | + | + | + |   |
| At4g04350 | + | + | + |   |
| At4g04460 | + | + | + |   |
| At4g04470 | + | + | + |   |
| At4g04500 | + |   | + |   |
| At4g04540 | + |   | + |   |
| At4g04610 | + | + | + |   |
| At4g04620 | + | + | + |   |
| At4g04630 | + | + |   |   |
| At4g04640 | + | + | + |   |
| At4g04670 | + | + | + |   |
| At4g04710 | + | + | + |   |
| At4g04750 |   | + |   |   |
| At4g04760 | + |   |   |   |
| At4g04770 | + | + | + |   |
| At4g04790 | + | + | + |   |
| At4g04800 | + | + | + |   |
| At4g04850 | + | + | + |   |
| At4g04860 | + | + | + |   |
| At4g04870 | + | + | + |   |
| At4g04880 | + | + | + |   |
| At4g04890 | + | + | + |   |
| At4g04910 | + | + | + |   |
| At4g04920 | + | + | + |   |
| At4g04930 | + | + | + |   |
| At4g04940 | + | + | + |   |
| At4g04950 | + | + | + |   |
| At4g04955 | + | + | + |   |
| At4g04960 | + | + | + |   |
| At4g04970 | + | + | + |   |
| At4g04980 | + | + |   | + |
| At4g05000 | + | + | + |   |
| At4g05020 | + | + | + |   |
| At4g05050 | + | + | + |   |
| At4g05060 | + | + | + |   |
| At4g05070 | + | + | + |   |
| At4g05090 | + | + | + |   |
| At4g05110 | + | + | + |   |
| At4g05150 | + | + | + |   |
| At4g05160 | + | + | + |   |
| At4g05180 | + | + | + |   |

|           |   |   |   |   |
|-----------|---|---|---|---|
| At4g05190 | + | + | + |   |
| At4g05320 | + | + | + |   |
| At4g05330 | + | + | + |   |
| At4g05390 | + | + | + |   |
| At4g05400 | + | + | + |   |
| At4g05410 | + | + | + |   |
| At4g05420 | + | + | + |   |
| At4g05440 | + | + | + |   |
| At4g05450 | + | + | + |   |
| At4g05460 | + | + | + |   |
| At4g05520 | + | + | + |   |
| At4g05530 | + | + | + |   |
| At4g05590 |   | + | + |   |
| At4g07390 | + | + | + |   |
| At4g07400 | + |   | + |   |
| At4g07410 | + | + | + |   |
| At4g07670 | + |   | + |   |
| At4g07680 | + | + | + |   |
| At4g07920 |   | + |   |   |
| At4g07950 | + | + | + |   |
| At4g07960 | + | + | + |   |
| At4g07990 | + | + | + |   |
| At4g08150 | + | + | + |   |
| At4g08160 | + | + | + |   |
| At4g08170 | + |   |   |   |
| At4g08180 | + | + | + |   |
| At4g08220 | + | + | + |   |
| At4g08230 | + | + | + |   |
| At4g08240 | + | + | + |   |
| At4g08280 | + | + | + |   |
| At4g08290 | + | + | + |   |
| At4g08300 |   | + |   |   |
| At4g08310 | + | + | + |   |
| At4g08320 | + | + | + |   |
| At4g08330 | + | + | + |   |
| At4g08350 | + | + | + |   |
| At4g08390 | + | + | + |   |
| At4g08410 | + |   | + |   |
| At4g08460 | + | + | + |   |
| At4g08470 | + | + | + |   |
| At4g08500 | + | + | + |   |
| At4g08590 | + |   |   |   |
| At4g08670 | + | + | + | + |
| At4g08685 | + | + | + |   |
| At4g08690 | + |   | + |   |
| At4g08700 | + | + | + |   |
| At4g08790 | + | + | + |   |
| At4g08850 | + | + | + |   |
| At4g08870 | + | + | + |   |
| At4g08920 | + | + | + |   |
| At4g08930 | + | + | + |   |
| At4g08940 | + | + | + |   |

|           |   |   |   |   |
|-----------|---|---|---|---|
| At4g08950 | + | + | + |   |
| At4g08960 | + | + | + |   |
| At4g08980 | + | + | + |   |
| At4g09000 | + | + | + |   |
| At4g09010 | + | + | + |   |
| At4g09020 | + | + | + |   |
| At4g09030 | + | + | + |   |
| At4g09040 | + | + | + |   |
| At4g09090 |   |   | + | + |
| At4g09140 | + |   |   | + |
| At4g09150 | + | + | + |   |
| At4g09160 | + | + | + |   |
| At4g09320 | + | + | + |   |
| At4g09330 | + | + | + |   |
| At4g09350 | + | + | + |   |
| At4g09455 | + | + | + |   |
| At4g09460 | + | + | + |   |
| At4g09470 |   | + |   |   |
| At4g09490 | + | + | + |   |
| At4g09500 | + | + | + |   |
| At4g09510 | + | + | + |   |
| At4g09520 | + | + | + |   |
| At4g09550 | + | + | + |   |
| At4g09560 | + | + | + |   |
| At4g09570 | + | + | + |   |
| At4g09580 | + | + | + |   |
| At4g09620 | + | + | + |   |
| At4g09630 | + | + | + |   |
| At4g09640 | + | + | + |   |
| At4g09650 | + | + | + |   |
| At4g09670 | + | + | + |   |
| At4g09680 | + | + | + |   |
| At4g09710 | + | + | + |   |
| At4g09720 | + | + | + |   |
| At4g09730 | + | + | + |   |
| At4g09740 | + | + | + |   |
| At4g09760 | + | + | + |   |
| At4g09800 | + | + | + |   |
| At4g09810 | + | + | + |   |
| At4g09820 |   |   | + | + |
| At4g09830 | + | + | + |   |
| At4g09840 | + |   |   |   |
| At4g09890 | + | + | + |   |
| At4g09900 | + | + | + |   |
| At4g09910 | + | + | + |   |
| At4g09920 | + |   |   |   |
| At4g09950 |   | + | + |   |
| At4g09960 | + | + | + | + |
| At4g09970 | + | + | + |   |
| At4g09980 | + | + | + |   |
| At4g09990 | + |   |   |   |
| At4g10000 | + | + | + |   |

|           |   |   |   |   |
|-----------|---|---|---|---|
| At4g10010 | + | + |   | + |
| At4g10030 | + | + | + |   |
| At4g10040 | + | + | + |   |
| At4g10050 | + | + | + |   |
| At4g10060 | + | + | + |   |
| At4g10070 | + | + | + |   |
| At4g10090 | + | + | + |   |
| At4g10100 | + | + | + |   |
| At4g10120 | + | + | + |   |
| At4g10130 | + | + | + |   |
| At4g10140 | + | + | + |   |
| At4g10170 | + | + | + |   |
| At4g10180 | + | + | + |   |
| At4g10220 |   | + |   | + |
| At4g10240 | + |   |   | + |
| At4g10260 | + |   |   | + |
| At4g10270 | + | + | + |   |
| At4g10280 | + | + | + |   |
| At4g10300 | + | + | + |   |
| At4g10310 |   | + |   |   |
| At4g10320 | + | + | + |   |
| At4g10330 | + | + | + |   |
| At4g10340 | + | + | + |   |
| At4g10360 | + | + | + |   |
| At4g10380 | + | + | + |   |
| At4g10390 | + |   |   |   |
| At4g10440 | + |   |   |   |
| At4g10450 | + | + | + |   |
| At4g10470 | + | + | + |   |
| At4g10480 | + | + | + |   |
| At4g10590 | + | + | + |   |
| At4g10610 | + | + | + |   |
| At4g10620 | + | + | + |   |
| At4g10710 | + | + | + |   |
| At4g10750 | + | + | + |   |
| At4g10760 | + | + | + |   |
| At4g10770 | + | + | + |   |
| At4g10790 | + | + | + |   |
| At4g10810 | + | + | + |   |
| At4g10840 | + | + | + |   |
| At4g10845 | + |   |   |   |
| At4g10850 | + | + | + | + |
| At4g10890 | + | + | + |   |
| At4g10910 | + |   |   |   |
| At4g10920 | + | + | + |   |
| At4g10925 | + | + | + |   |
| At4g10930 | + | + | + |   |
| At4g10950 | + |   | + |   |
| At4g10955 | + | + | + |   |
| At4g10960 | + | + |   |   |
| At4g10970 | + | + | + |   |
| At4g11000 |   | + |   |   |

|           |   |   |   |   |
|-----------|---|---|---|---|
| At4g11010 | + | + | + |   |
| At4g11030 | + |   |   |   |
| At4g11050 | + | + | + |   |
| At4g11060 | + | + | + |   |
| At4g11080 | + | + | + |   |
| At4g11090 | + | + | + |   |
| At4g11100 | + | + | + |   |
| At4g11110 | + | + | + |   |
| At4g11120 | + | + | + |   |
| At4g11130 | + | + | + |   |
| At4g11150 | + | + | + |   |
| At4g11160 | + | + | + |   |
| At4g11175 | + | + | + |   |
| At4g11220 | + | + | + |   |
| At4g11240 | + | + | + |   |
| At4g11260 | + | + | + |   |
| At4g11270 | + | + | + |   |
| At4g11280 | + | + | + |   |
| At4g11290 |   | + |   |   |
| At4g11300 | + | + |   |   |
| At4g11310 | + | + |   |   |
| At4g11330 | + | + | + |   |
| At4g11350 | + |   |   | + |
| At4g11360 | + | + | + |   |
| At4g11370 | + | + | + |   |
| At4g11380 | + | + | + |   |
| At4g11410 | + | + | + |   |
| At4g11420 | + | + | + |   |
| At4g11450 | + | + | + |   |
| At4g11460 | + |   |   |   |
| At4g11510 |   |   | + | + |
| At4g11530 | + | + | + |   |
| At4g11560 | + | + | + |   |
| At4g11570 | + | + | + |   |
| At4g11600 | + | + | + |   |
| At4g11640 | + | + | + |   |
| At4g11650 |   | + | + |   |
| At4g11660 | + | + | + |   |
| At4g11670 | + | + | + |   |
| At4g11740 | + | + | + |   |
| At4g11790 | + | + | + |   |
| At4g11800 | + | + | + |   |
| At4g11820 | + | + | + |   |
| At4g11830 |   | + | + |   |
| At4g11835 | + | + | + |   |
| At4g11850 |   |   | + |   |
| At4g11860 | + | + | + |   |
| At4g11890 | + | + | + |   |
| At4g11960 | + | + | + |   |
| At4g11970 | + | + | + |   |
| At4g11980 | + | + | + |   |
| At4g12000 | + | + | + |   |

|           |   |   |   |   |
|-----------|---|---|---|---|
| At4g12010 | + | + | + |   |
| At4g12020 | + | + | + |   |
| At4g12030 | + | + | + |   |
| At4g12040 | + | + | + |   |
| At4g12060 | + | + | + |   |
| At4g12070 | + | + | + |   |
| At4g12110 | + | + | + |   |
| At4g12120 | + | + | + |   |
| At4g12130 | + | + | + |   |
| At4g12230 | + | + | + |   |
| At4g12240 | + | + | + |   |
| At4g12250 | + | + | + |   |
| At4g12280 | + | + | + |   |
| At4g12300 | + | + |   |   |
| At4g12310 | + | + | + |   |
| At4g12340 | + | + | + |   |
| At4g12390 | + | + | + |   |
| At4g12400 | + |   | + |   |
| At4g12410 |   | + |   |   |
| At4g12420 | + | + | + |   |
| At4g12430 | + | + | + |   |
| At4g12460 | + | + | + |   |
| At4g12530 |   | + |   |   |
| At4g12570 | + | + | + |   |
| At4g12590 | + | + | + |   |
| At4g12600 | + | + | + |   |
| At4g12620 | + | + | + |   |
| At4g12630 | + |   | + |   |
| At4g12640 | + | + | + |   |
| At4g12650 | + | + | + |   |
| At4g12700 | + | + | + |   |
| At4g12720 | + | + | + |   |
| At4g12730 | + | + | + |   |
| At4g12750 | + | + | + |   |
| At4g12760 | + | + | + |   |
| At4g12770 | + | + | + |   |
| At4g12790 | + | + | + |   |
| At4g12800 | + | + | + |   |
| At4g12830 | + |   | + |   |
| At4g12840 | + | + | + |   |
| At4g12860 | + |   |   |   |
| At4g12880 | + | + | + |   |
| At4g12890 | + | + | + |   |
| At4g12910 | + | + | + |   |
| At4g12930 | + | + |   |   |
| At4g12960 | + | + | + | + |
| At4g12970 | + | + | + |   |
| At4g12980 | + | + | + |   |
| At4g12990 | + | + | + |   |
| At4g13000 | + | + | + |   |
| At4g13010 | + | + | + |   |
| At4g13020 | + | + | + |   |

|           |   |   |   |   |
|-----------|---|---|---|---|
| At4g13030 | + |   |   |   |
| At4g13050 | + | + | + |   |
| At4g13080 |   | + | + |   |
| At4g13090 |   | + |   |   |
| At4g13100 | + | + | + |   |
| At4g13140 | + | + | + |   |
| At4g13160 | + | + | + |   |
| At4g13170 | + | + | + |   |
| At4g13180 | + | + | + |   |
| At4g13195 | + | + | + |   |
| At4g13200 | + | + | + |   |
| At4g13210 | + |   |   |   |
| At4g13220 | + | + | + |   |
| At4g13230 | + |   |   | + |
| At4g13240 | + | + |   |   |
| At4g13250 | + | + | + |   |
| At4g13260 | + | + | + |   |
| At4g13270 | + | + | + |   |
| At4g13330 | + | + | + |   |
| At4g13340 | + | + | + |   |
| At4g13345 | + |   |   |   |
| At4g13360 | + | + | + |   |
| At4g13410 |   |   | + |   |
| At4g13420 |   |   | + |   |
| At4g13430 | + | + | + |   |
| At4g13450 | + | + |   |   |
| At4g13460 | + | + | + |   |
| At4g13510 | + | + | + |   |
| At4g13520 | + | + | + |   |
| At4g13530 | + | + | + |   |
| At4g13550 | + | + | + |   |
| At4g13560 | + | + | + | + |
| At4g13600 | + | + | + |   |
| At4g13610 | + |   |   |   |
| At4g13630 | + |   |   |   |
| At4g13640 | + | + | + |   |
| At4g13670 | + | + | + |   |
| At4g13710 | + | + | + |   |
| At4g13720 | + | + | + |   |
| At4g13730 | + | + | + |   |
| At4g13740 | + |   |   |   |
| At4g13750 | + | + | + |   |
| At4g13770 | + | + | + |   |
| At4g13780 | + | + | + |   |
| At4g13790 | + | + |   |   |
| At4g13800 | + |   |   |   |
| At4g13830 | + | + | + |   |
| At4g13840 |   |   | + |   |
| At4g13850 | + | + | + |   |
| At4g13890 | + | + | + |   |
| At4g13940 | + | + | + |   |
| At4g13950 | + | + | + |   |

|           |   |   |  |   |
|-----------|---|---|--|---|
| At4g13960 | + |   |  |   |
| At4g13980 | + | + |  | + |
| At4g13990 | + |   |  |   |
| At4g14000 | + | + |  | + |
| At4g14010 | + | + |  | + |
| At4g14020 | + | + |  | + |
| At4g14040 | + | + |  | + |
| At4g14070 | + | + |  | + |
| At4g14080 | + |   |  | + |
| At4g14090 |   | + |  | + |
| At4g14100 | + | + |  | + |
| At4g14103 | + | + |  | + |
| At4g14110 | + | + |  | + |
| At4g14130 | + | + |  | + |
| At4g14150 | + | + |  | + |
| At4g14160 | + | + |  | + |
| At4g14190 | + | + |  | + |
| At4g14200 | + | + |  | + |
| At4g14210 | + | + |  | + |
| At4g14220 |   |   |  | + |
| At4g14230 | + | + |  | + |
| At4g14240 | + | + |  | + |
| At4g14270 | + | + |  | + |
| At4g14290 |   |   |  | + |
| At4g14300 | + | + |  | + |
| At4g14310 |   | + |  | + |
| At4g14320 | + | + |  | + |
| At4g14330 | + | + |  | + |
| At4g14340 | + | + |  | + |
| At4g14350 | + | + |  | + |
| At4g14360 | + | + |  | + |
| At4g14365 | + | + |  | + |
| At4g14380 |   |   |  | + |
| At4g14385 | + | + |  | + |
| At4g14390 |   | + |  |   |
| At4g14410 | + | + |  | + |
| At4g14420 | + | + |  | + |
| At4g14430 | + | + |  | + |
| At4g14440 | + | + |  | + |
| At4g14470 | + |   |  |   |
| At4g14480 | + |   |  |   |
| At4g14490 | + |   |  |   |
| At4g14500 | + | + |  | + |
| At4g14510 | + | + |  | + |
| At4g14540 | + | + |  | + |
| At4g14550 |   | + |  | + |
| At4g14570 | + | + |  | + |
| At4g14580 |   | + |  |   |
| At4g14600 | + | + |  | + |
| At4g14605 | + | + |  | + |
| At4g14615 | + | + |  | + |
| At4g14660 | + | + |  | + |



|           |   |   |   |   |
|-----------|---|---|---|---|
| At4g14680 | + |   | + |   |
| At4g14690 | + | + | + |   |
| At4g14695 | + | + | + | + |
| At4g14716 | + | + | + |   |
| At4g14720 | + | + | + |   |
| At4g14730 | + | + | + |   |
| At4g14750 | + | + | + |   |
| At4g14760 | + | + | + |   |
| At4g14770 | + |   |   |   |
| At4g14780 | + | + |   | + |
| At4g14790 | + | + | + |   |
| At4g14800 | + | + | + |   |
| At4g14815 | + |   |   | + |
| At4g14820 | + | + | + |   |
| At4g14840 | + |   | + |   |
| At4g14850 |   |   | + |   |
| At4g14870 | + | + | + |   |
| At4g14880 | + | + | + |   |
| At4g14890 | + | + | + |   |
| At4g14900 | + | + | + |   |
| At4g14910 | + | + | + |   |
| At4g14920 | + | + | + |   |
| At4g14930 | + | + | + |   |
| At4g14940 | + | + | + |   |
| At4g14950 | + | + | + |   |
| At4g14960 | + | + | + |   |
| At4g14965 | + | + | + |   |
| At4g14970 | + | + | + | + |
| At4g14990 | + | + | + |   |
| At4g15000 | + | + | + |   |
| At4g15020 | + | + |   |   |
| At4g15030 | + | + | + |   |
| At4g15050 |   |   | + | + |
| At4g15090 | + | + | + |   |
| At4g15093 | + | + | + |   |
| At4g15110 | + | + | + |   |
| At4g15120 |   | + |   |   |
| At4g15130 | + | + | + |   |
| At4g15140 | + | + | + |   |
| At4g15160 | + | + | + |   |
| At4g15180 | + | + | + |   |
| At4g15210 | + | + | + | + |
| At4g15240 | + | + | + |   |
| At4g15260 | + |   |   |   |
| At4g15410 | + | + | + |   |
| At4g15415 | + | + | + |   |
| At4g15420 | + | + | + |   |
| At4g15430 | + | + | + |   |
| At4g15440 | + | + | + |   |
| At4g15460 | + |   |   |   |
| At4g15470 | + | + | + |   |
| At4g15475 | + | + | + |   |

|           |   |   |   |   |
|-----------|---|---|---|---|
| At4g15480 | + | + | + |   |
| At4g15490 | + | + | + |   |
| At4g15510 | + | + | + |   |
| At4g15520 | + | + | + |   |
| At4g15530 | + | + | + |   |
| At4g15545 | + | + | + |   |
| At4g15550 | + | + | + |   |
| At4g15560 | + | + | + |   |
| At4g15570 | + | + | + |   |
| At4g15580 |   |   | + |   |
| At4g15610 |   | + | + |   |
| At4g15620 | + | + | + |   |
| At4g15630 | + | + | + |   |
| At4g15640 | + | + | + |   |
| At4g15660 |   | + |   |   |
| At4g15680 |   | + |   |   |
| At4g15730 | + | + | + |   |
| At4g15750 |   | + | + | + |
| At4g15770 | + | + | + |   |
| At4g15780 | + | + | + |   |
| At4g15790 | + | + | + |   |
| At4g15800 | + | + | + |   |
| At4g15810 |   |   | + | + |
| At4g15820 | + | + | + |   |
| At4g15830 | + | + | + |   |
| At4g15840 | + | + | + |   |
| At4g15850 | + | + | + |   |
| At4g15880 | + | + | + |   |
| At4g15890 | + | + | + |   |
| At4g15900 | + | + | + |   |
| At4g15910 | + | + | + |   |
| At4g15920 | + | + | + |   |
| At4g15930 | + | + | + |   |
| At4g15940 | + | + | + |   |
| At4g15950 | + | + | + |   |
| At4g15980 | + | + | + |   |
| At4g16060 | + | + | + |   |
| At4g16100 | + | + | + |   |
| At4g16110 | + | + | + |   |
| At4g16120 | + | + | + |   |
| At4g16130 | + | + | + |   |
| At4g16140 | + | + | + |   |
| At4g16143 | + | + | + |   |
| At4g16146 | + | + | + |   |
| At4g16150 | + | + | + |   |
| At4g16155 | + | + | + |   |
| At4g16160 | + |   |   | + |
| At4g16170 | + | + | + |   |
| At4g16180 | + | + | + |   |
| At4g16190 | + | + | + |   |
| At4g16210 | + | + | + |   |
| At4g16230 | + |   |   |   |

|           |   |   |   |   |
|-----------|---|---|---|---|
| At4g16250 |   | + | + |   |
| At4g16265 | + | + | + |   |
| At4g16270 | + |   |   |   |
| At4g16280 | + | + | + |   |
| At4g16320 | + | + | + |   |
| At4g16330 | + | + | + |   |
| At4g16340 | + | + | + |   |
| At4g16350 |   | + |   |   |
| At4g16360 | + | + | + |   |
| At4g16370 | + | + | + |   |
| At4g16390 | + | + | + |   |
| At4g16400 |   |   | + |   |
| At4g16410 | + | + | + |   |
| At4g16420 | + | + | + |   |
| At4g16430 | + | + | + |   |
| At4g16440 | + | + | + |   |
| At4g16442 | + | + | + |   |
| At4g16444 | + | + | + |   |
| At4g16447 | + | + | + |   |
| At4g16450 | + | + | + |   |
| At4g16460 | + |   |   |   |
| At4g16470 | + |   |   |   |
| At4g16480 | + | + |   |   |
| At4g16490 | + | + | + |   |
| At4g16500 | + | + | + |   |
| At4g16510 | + | + | + |   |
| At4g16515 | + | + | + |   |
| At4g16520 | + | + | + |   |
| At4g16563 |   | + | + |   |
| At4g16566 | + | + | + |   |
| At4g16570 | + | + | + |   |
| At4g16590 | + | + | + | + |
| At4g16600 | + | + | + |   |
| At4g16610 | + | + | + | + |
| At4g16620 | + | + | + |   |
| At4g16630 | + | + | + | + |
| At4g16640 | + |   | + |   |
| At4g16650 | + | + | + |   |
| At4g16660 | + | + | + |   |
| At4g16670 |   | + |   |   |
| At4g16690 | + | + | + |   |
| At4g16700 | + | + | + |   |
| At4g16710 |   |   | + |   |
| At4g16720 | + | + | + |   |
| At4g16730 | + | + |   | + |
| At4g16745 | + | + |   | + |
| At4g16760 | + | + | + |   |
| At4g16770 | + | + | + |   |
| At4g16790 | + | + | + |   |
| At4g16800 | + | + | + |   |
| At4g16830 | + | + | + |   |
| At4g16840 | + | + | + |   |

|           |   |   |   |   |
|-----------|---|---|---|---|
| At4g16845 | + | + | + |   |
| At4g16850 | + |   |   |   |
| At4g16920 | + | + | + |   |
| At4g16950 | + | + | + |   |
| At4g16985 | + | + | + |   |
| At4g16990 | + |   |   |   |
| At4g17000 | + | + | + |   |
| At4g17010 | + | + | + |   |
| At4g17020 | + | + | + |   |
| At4g17040 | + | + | + |   |
| At4g17050 | + | + | + |   |
| At4g17060 | + | + | + |   |
| At4g17070 | + | + | + |   |
| At4g17080 | + | + | + |   |
| At4g17090 | + | + | + |   |
| At4g17100 | + | + | + |   |
| At4g17110 | + | + | + |   |
| At4g17120 | + | + | + |   |
| At4g17130 |   | + |   |   |
| At4g17150 | + | + | + |   |
| At4g17170 | + | + | + |   |
| At4g17180 | + | + | + |   |
| At4g17190 | + | + | + |   |
| At4g17215 |   |   | + |   |
| At4g17230 | + | + | + |   |
| At4g17240 |   |   | + |   |
| At4g17245 | + | + | + |   |
| At4g17260 | + | + | + |   |
| At4g17270 | + | + | + |   |
| At4g17280 |   |   | + |   |
| At4g17300 | + | + | + |   |
| At4g17330 | + | + | + |   |
| At4g17340 |   | + |   |   |
| At4g17350 | + | + | + |   |
| At4g17370 | + | + | + |   |
| At4g17390 | + | + | + |   |
| At4g17420 | + | + | + |   |
| At4g17430 | + | + | + |   |
| At4g17460 | + | + | + |   |
| At4g17480 |   | + | + | + |
| At4g17483 | + | + | + |   |
| At4g17486 | + | + | + |   |
| At4g17500 | + |   |   |   |
| At4g17510 | + | + | + |   |
| At4g17520 | + | + | + |   |
| At4g17530 | + | + | + |   |
| At4g17540 | + | + | + |   |
| At4g17550 | + | + | + |   |
| At4g17560 | + | + | + |   |
| At4g17570 | + | + | + |   |
| At4g17600 | + | + | + |   |
| At4g17610 | + | + | + |   |

|           |   |   |   |   |
|-----------|---|---|---|---|
| At4g17615 | + | + |   |   |
| At4g17620 | + | + | + |   |
| At4g17640 | + | + | + |   |
| At4g17650 | + | + | + |   |
| At4g17670 | + | + | + |   |
| At4g17690 | + | + | + |   |
| At4g17695 | + | + | + |   |
| At4g17720 | + | + | + |   |
| At4g17730 | + | + | + |   |
| At4g17740 | + | + | + |   |
| At4g17750 |   |   | + |   |
| At4g17760 | + |   |   |   |
| At4g17770 | + | + | + |   |
| At4g17790 | + | + | + |   |
| At4g17830 | + | + | + |   |
| At4g17840 | + | + | + |   |
| At4g17870 | + | + | + |   |
| At4g17880 | + | + | + |   |
| At4g17890 | + | + | + |   |
| At4g17895 | + | + | + |   |
| At4g17900 | + | + | + |   |
| At4g17910 | + | + | + |   |
| At4g17940 | + | + | + |   |
| At4g17950 | + | + | + |   |
| At4g17960 | + | + | + |   |
| At4g17970 | + |   | + |   |
| At4g18010 | + | + | + |   |
| At4g18020 | + | + | + | + |
| At4g18030 | + | + | + |   |
| At4g18040 | + | + | + |   |
| At4g18050 | + | + | + |   |
| At4g18060 | + | + | + |   |
| At4g18070 | + | + | + |   |
| At4g18100 | + | + | + |   |
| At4g18120 | + | + | + |   |
| At4g18130 | + | + | + |   |
| At4g18140 | + | + | + |   |
| At4g18160 | + | + | + |   |
| At4g18210 | + | + | + |   |
| At4g18230 | + | + | + |   |
| At4g18240 | + | + | + |   |
| At4g18260 |   | + | + |   |
| At4g18270 | + | + |   |   |
| At4g18280 | + | + | + |   |
| At4g18290 |   |   | + |   |
| At4g18300 | + | + | + |   |
| At4g18340 | + | + | + |   |
| At4g18370 | + | + | + |   |
| At4g18375 | + |   |   | + |
| At4g18390 | + | + | + |   |
| At4g18395 | + | + |   | + |
| At4g18400 | + | + | + |   |

|           |   |   |   |   |
|-----------|---|---|---|---|
| At4g18425 | + | + | + |   |
| At4g18430 | + | + | + |   |
| At4g18440 | + | + | + |   |
| At4g18460 | + | + | + |   |
| At4g18465 | + | + | + |   |
| At4g18470 | + | + | + |   |
| At4g18480 | + | + | + |   |
| At4g18530 | + | + |   |   |
| At4g18540 |   | + |   | + |
| At4g18550 | + | + |   |   |
| At4g18570 | + | + | + |   |
| At4g18580 | + | + | + |   |
| At4g18590 | + | + | + |   |
| At4g18593 | + | + | + |   |
| At4g18600 | + | + | + |   |
| At4g18630 |   |   | + |   |
| At4g18640 | + | + | + |   |
| At4g18670 | + | + | + |   |
| At4g18700 | + | + | + |   |
| At4g18710 | + | + | + |   |
| At4g18730 | + | + | + |   |
| At4g18740 | + | + | + |   |
| At4g18750 |   | + | + |   |
| At4g18780 | + |   |   |   |
| At4g18790 | + | + |   | + |
| At4g18800 | + | + | + |   |
| At4g18810 | + | + | + |   |
| At4g18820 | + | + | + |   |
| At4g18840 | + |   | + |   |
| At4g18870 |   |   | + | + |
| At4g18880 | + | + | + |   |
| At4g18890 | + | + | + |   |
| At4g18900 | + | + | + |   |
| At4g18910 | + | + | + |   |
| At4g18920 | + |   |   | + |
| At4g18930 | + | + | + |   |
| At4g18950 | + | + | + |   |
| At4g18960 | + | + | + | + |
| At4g18970 | + | + | + |   |
| At4g18975 | + | + | + |   |
| At4g18980 |   | + |   | + |
| At4g18990 | + | + |   | + |
| At4g19010 | + |   | + |   |
| At4g19020 | + | + | + |   |
| At4g19040 | + | + | + |   |
| At4g19050 | + |   |   |   |
| At4g19070 | + |   |   |   |
| At4g19110 | + | + | + |   |
| At4g19120 | + | + | + |   |
| At4g19140 | + | + | + |   |
| At4g19150 | + | + | + |   |
| At4g19160 | + | + | + |   |

|           |   |   |   |
|-----------|---|---|---|
| At4g19170 | + | + |   |
| At4g19185 | + | + | + |
| At4g19200 | + | + | + |
| At4g19210 | + | + | + |
| At4g19230 | + | + | + |
| At4g19240 | + | + | + |
| At4g19350 | + | + | + |
| At4g19380 | + |   | + |
| At4g19390 | + | + | + |
| At4g19400 |   |   | + |
| At4g19410 | + | + | + |
| At4g19420 | + | + | + |
| At4g19430 | + | + | + |
| At4g19440 | + |   | + |
| At4g19450 | + | + | + |
| At4g19460 |   | + |   |
| At4g19490 | + | + | + |
| At4g19530 | + |   | + |
| At4g19540 | + | + | + |
| At4g19550 | + |   |   |
| At4g19600 | + | + | + |
| At4g19610 | + | + | + |
| At4g19640 | + | + | + |
| At4g19660 | + | + | + |
| At4g19670 | + | + | + |
| At4g19690 | + | + |   |
| At4g19710 | + | + | + |
| At4g19790 |   | + |   |
| At4g19810 |   | + | + |
| At4g19830 | + | + | + |
| At4g19840 | + | + | + |
| At4g19860 | + | + | + |
| At4g19870 | + |   | + |
| At4g19880 | + | + | + |
| At4g19960 | + | + | + |
| At4g19985 | + | + | + |
| At4g20010 | + | + | + |
| At4g20020 | + | + | + |
| At4g20030 |   |   | + |
| At4g20050 | + | + | + |
| At4g20070 | + | + | + |
| At4g20100 | + |   |   |
| At4g20120 | + | + | + |
| At4g20130 | + | + | + |
| At4g20140 | + |   |   |
| At4g20150 | + | + | + |
| At4g20160 | + | + |   |
| At4g20170 | + | + | + |
| At4g20240 | + |   |   |
| At4g20260 | + | + | + |
| At4g20270 | + | + | + |
| At4g20280 | + | + | + |

|           |   |   |   |   |
|-----------|---|---|---|---|
| At4g20300 | + | + | + |   |
| At4g20310 | + | + | + |   |
| At4g20320 | + | + | + |   |
| At4g20330 | + | + | + |   |
| At4g20360 | + | + | + |   |
| At4g20380 | + | + | + |   |
| At4g20400 | + | + | + |   |
| At4g20410 | + | + | + |   |
| At4g20420 | + |   |   |   |
| At4g20430 | + | + | + |   |
| At4g20440 | + | + | + |   |
| At4g20450 | + |   |   |   |
| At4g20460 | + | + | + |   |
| At4g20480 | + |   |   |   |
| At4g20680 | + |   |   | + |
| At4g20720 | + | + | + |   |
| At4g20740 | + |   | + |   |
| At4g20750 | + | + | + |   |
| At4g20760 | + | + | + |   |
| At4g20780 | + | + | + |   |
| At4g20830 | + | + | + |   |
| At4g20840 | + | + | + |   |
| At4g20850 | + | + | + |   |
| At4g20870 | + | + | + |   |
| At4g20880 | + | + | + |   |
| At4g20890 | + | + | + |   |
| At4g20910 | + | + | + |   |
| At4g20930 | + | + | + |   |
| At4g20960 | + | + | + |   |
| At4g20980 | + | + | + |   |
| At4g21060 | + | + | + |   |
| At4g21090 | + | + | + |   |
| At4g21105 | + | + | + |   |
| At4g21110 | + | + | + |   |
| At4g21120 | + | + |   |   |
| At4g21140 | + | + | + |   |
| At4g21150 | + | + | + |   |
| At4g21160 | + | + | + |   |
| At4g21170 |   | + | + |   |
| At4g21180 | + | + | + |   |
| At4g21190 | + | + | + |   |
| At4g21200 |   | + | + | + |
| At4g21210 | + | + | + |   |
| At4g21270 | + |   | + | + |
| At4g21280 | + | + | + |   |
| At4g21310 | + | + | + |   |
| At4g21320 | + | + | + |   |
| At4g21326 | + | + | + |   |
| At4g21350 | + | + | + |   |
| At4g21380 | + |   |   |   |
| At4g21390 |   |   | + |   |
| At4g21410 | + | + | + |   |



|           |   |   |   |   |
|-----------|---|---|---|---|
| At4g21430 | + | + | + |   |
| At4g21450 | + | + | + |   |
| At4g21470 | + | + | + |   |
| At4g21480 | + | + | + |   |
| At4g21490 | + |   |   | + |
| At4g21510 | + | + | + |   |
| At4g21560 | + | + | + |   |
| At4g21580 | + | + | + |   |
| At4g21590 | + | + | + |   |
| At4g21610 | + | + |   |   |
| At4g21620 | + | + | + |   |
| At4g21630 |   | + | + | + |
| At4g21650 | + | + | + |   |
| At4g21680 | + | + |   |   |
| At4g21710 | + | + | + |   |
| At4g21730 | + |   |   | + |
| At4g21750 | + | + | + |   |
| At4g21760 |   | + | + |   |
| At4g21790 | + | + | + |   |
| At4g21800 | + | + | + |   |
| At4g21810 | + | + | + |   |
| At4g21860 | + | + | + |   |
| At4g21870 | + | + |   |   |
| At4g21880 | + |   |   |   |
| At4g21890 | + |   | + |   |
| At4g21910 | + | + | + |   |
| At4g21940 | + | + | + |   |
| At4g21960 | + | + | + |   |
| At4g21980 | + | + | + |   |
| At4g21990 | + | + | + |   |
| At4g22000 | + | + | + |   |
| At4g22010 | + | + | + |   |
| At4g22050 |   |   | + | + |
| At4g22070 | + |   |   |   |
| At4g22080 | + |   |   |   |
| At4g22120 | + | + | + |   |
| At4g22130 | + | + | + |   |
| At4g22140 | + | + | + |   |
| At4g22150 | + | + | + |   |
| At4g22190 | + | + | + |   |
| At4g22200 | + | + | + |   |
| At4g22220 | + | + | + |   |
| At4g22250 | + | + | + |   |
| At4g22260 | + | + | + |   |
| At4g22270 | + | + | + |   |
| At4g22280 | + | + | + |   |
| At4g22300 | + | + | + |   |
| At4g22310 | + | + | + |   |
| At4g22320 | + | + | + |   |
| At4g22330 | + | + | + |   |
| At4g22340 | + | + | + |   |
| At4g22350 | + | + | + |   |

|           |   |   |   |
|-----------|---|---|---|
| At4g22360 | + | + | + |
| At4g22380 | + | + | + |
| At4g22410 | + |   | + |
| At4g22450 |   |   | + |
| At4g22470 |   |   | + |
| At4g22490 | + | + | + |
| At4g22530 |   | + | + |
| At4g22540 | + | + | + |
| At4g22560 | + | + | + |
| At4g22570 | + | + | + |
| At4g22580 | + | + | + |
| At4g22590 | + | + | + |
| At4g22640 |   | + |   |
| At4g22670 | + | + | + |
| At4g22680 | + |   |   |
| At4g22710 | + | + | + |
| At4g22720 | + | + | + |
| At4g22730 | + | + | + |
| At4g22740 | + | + | + |
| At4g22750 | + | + | + |
| At4g22753 | + | + | + |
| At4g22756 | + | + | + |
| At4g22770 | + |   |   |
| At4g22780 | + | + | + |
| At4g22790 | + | + |   |
| At4g22820 | + | + | + |
| At4g22830 | + | + | + |
| At4g22840 | + | + | + |
| At4g22850 | + | + | + |
| At4g22860 | + | + | + |
| At4g22870 |   | + | + |
| At4g22890 | + | + | + |
| At4g22910 | + | + | + |
| At4g22920 | + | + | + |
| At4g22930 | + | + | + |
| At4g22960 | + | + | + |
| At4g22970 | + | + | + |
| At4g23000 | + | + | + |
| At4g23010 | + | + | + |
| At4g23040 | + | + | + |
| At4g23050 |   | + |   |
| At4g23060 |   | + | + |
| At4g23100 | + | + | + |
| At4g23180 | + | + | + |
| At4g23190 | + | + | + |
| At4g23210 |   | + |   |
| At4g23260 |   | + |   |
| At4g23290 | + |   |   |
| At4g23330 | + |   |   |
| At4g23350 | + | + | + |
| At4g23400 | + | + | + |
| At4g23420 | + | + | + |

|           |   |   |   |   |
|-----------|---|---|---|---|
| At4g23440 | + | + | + |   |
| At4g23450 |   | + |   |   |
| At4g23460 | + | + | + |   |
| At4g23470 | + | + | + |   |
| At4g23490 | + | + | + |   |
| At4g23493 |   |   | + |   |
| At4g23496 | + | + | + |   |
| At4g23540 | + | + | + |   |
| At4g23570 | + | + | + |   |
| At4g23600 | + | + |   |   |
| At4g23610 |   | + |   |   |
| At4g23620 | + | + | + |   |
| At4g23630 | + | + | + |   |
| At4g23640 | + | + | + |   |
| At4g23650 | + | + | + |   |
| At4g23660 | + | + | + |   |
| At4g23670 | + | + | + |   |
| At4g23680 | + | + | + |   |
| At4g23690 | + | + | + |   |
| At4g23710 | + | + | + |   |
| At4g23730 | + | + | + |   |
| At4g23740 | + | + | + |   |
| At4g23750 | + | + | + |   |
| At4g23800 | + | + | + |   |
| At4g23810 | + | + | + |   |
| At4g23820 | + | + | + |   |
| At4g23840 | + | + | + |   |
| At4g23850 | + | + | + |   |
| At4g23860 | + |   | + |   |
| At4g23870 | + | + | + |   |
| At4g23880 | + | + | + |   |
| At4g23885 | + | + | + |   |
| At4g23890 | + | + | + |   |
| At4g23900 | + | + | + |   |
| At4g23910 | + | + | + |   |
| At4g23920 | + | + | + |   |
| At4g23940 | + | + | + |   |
| At4g23950 | + | + | + |   |
| At4g23980 | + | + | + |   |
| At4g23990 | + | + |   |   |
| At4g24000 | + | + | + |   |
| At4g24010 |   | + |   | + |
| At4g24020 | + | + | + |   |
| At4g24040 | + | + | + |   |
| At4g24050 | + | + | + |   |
| At4g24060 | + | + | + |   |
| At4g24090 | + | + | + |   |
| At4g24100 | + | + |   |   |
| At4g24120 | + | + | + |   |
| At4g24130 | + | + | + |   |
| At4g24140 | + |   |   |   |
| At4g24150 | + | + |   | + |

|           |   |   |   |   |
|-----------|---|---|---|---|
| At4g24160 | + | + | + |   |
| At4g24170 |   | + |   |   |
| At4g24175 | + | + | + |   |
| At4g24190 | + | + | + |   |
| At4g24200 | + | + | + |   |
| At4g24210 | + | + | + |   |
| At4g24220 | + | + | + |   |
| At4g24240 | + | + | + |   |
| At4g24250 | + |   | + |   |
| At4g24260 | + | + | + |   |
| At4g24270 | + | + | + |   |
| At4g24280 | + | + | + |   |
| At4g24290 | + | + | + |   |
| At4g24330 | + | + | + |   |
| At4g24340 | + |   |   |   |
| At4g24370 | + | + | + |   |
| At4g24380 | + | + | + |   |
| At4g24390 | + | + | + |   |
| At4g24400 | + | + | + |   |
| At4g24430 | + |   |   |   |
| At4g24440 | + | + | + |   |
| At4g24450 | + | + | + |   |
| At4g24460 | + | + | + |   |
| At4g24470 | + | + | + |   |
| At4g24480 | + |   |   |   |
| At4g24490 | + | + | + |   |
| At4g24500 | + | + | + |   |
| At4g24510 | + | + | + |   |
| At4g24520 | + | + | + |   |
| At4g24530 | + | + | + |   |
| At4g24550 | + | + | + |   |
| At4g24560 | + | + | + |   |
| At4g24570 | + | + | + |   |
| At4g24580 | + |   |   |   |
| At4g24610 | + | + | + |   |
| At4g24620 | + | + | + |   |
| At4g24630 | + | + |   | + |
| At4g24640 | + | + | + | + |
| At4g24660 | + | + | + |   |
| At4g24670 | + | + | + |   |
| At4g24680 | + | + | + |   |
| At4g24690 | + | + | + |   |
| At4g24700 | + | + | + |   |
| At4g24730 | + | + | + |   |
| At4g24740 | + | + | + |   |
| At4g24750 | + | + | + |   |
| At4g24760 | + | + | + |   |
| At4g24770 | + | + | + |   |
| At4g24780 | + | + | + |   |
| At4g24790 | + | + | + |   |
| At4g24800 | + | + | + |   |
| At4g24810 | + | + | + |   |

|           |   |   |   |   |
|-----------|---|---|---|---|
| At4g24820 | + | + | + |   |
| At4g24830 | + | + | + |   |
| At4g24840 | + | + | + |   |
| At4g24850 | + |   | + |   |
| At4g24880 | + | + | + |   |
| At4g24890 | + |   |   |   |
| At4g24900 | + |   |   |   |
| At4g24920 | + | + | + |   |
| At4g24930 | + | + | + |   |
| At4g24940 | + | + | + |   |
| At4g24960 | + | + | + |   |
| At4g24970 | + | + |   |   |
| At4g24990 | + | + | + |   |
| At4g25000 | + | + | + |   |
| At4g25010 | + | + |   |   |
| At4g25020 | + | + | + |   |
| At4g25030 | + | + | + |   |
| At4g25040 | + | + |   | + |
| At4g25050 | + | + | + |   |
| At4g25080 | + | + | + |   |
| At4g25100 | + | + | + |   |
| At4g25120 | + |   |   |   |
| At4g25130 | + | + | + |   |
| At4g25150 | + | + | + |   |
| At4g25160 | + |   |   |   |
| At4g25170 | + | + | + |   |
| At4g25210 | + | + | + |   |
| At4g25230 | + | + | + |   |
| At4g25240 | + | + |   |   |
| At4g25260 | + | + | + |   |
| At4g25270 | + |   |   |   |
| At4g25280 | + | + | + |   |
| At4g25300 | + | + |   |   |
| At4g25320 | + | + | + |   |
| At4g25340 | + | + | + |   |
| At4g25360 | + | + | + |   |
| At4g25370 | + | + | + |   |
| At4g25380 |   | + |   |   |
| At4g25390 |   | + |   |   |
| At4g25450 | + | + | + |   |
| At4g25460 | + | + | + |   |
| At4g25480 | + |   |   |   |
| At4g25500 | + | + | + |   |
| At4g25520 | + | + | + |   |
| At4g25530 |   |   | + |   |
| At4g25540 | + | + | + |   |
| At4g25550 | + | + | + |   |
| At4g25570 | + | + | + |   |
| At4g25590 | + | + |   | + |
| At4g25610 | + | + | + |   |
| At4g25620 | + | + | + |   |
| At4g25630 | + | + | + |   |

|           |   |   |   |   |
|-----------|---|---|---|---|
| At4g25640 | + | + | + |   |
| At4g25650 | + | + | + |   |
| At4g25660 | + | + | + |   |
| At4g25670 | + | + | + |   |
| At4g25680 | + | + | + |   |
| At4g25700 | + | + | + |   |
| At4g25710 | + | + | + |   |
| At4g25720 | + | + | + |   |
| At4g25730 | + | + | + |   |
| At4g25740 | + | + | + |   |
| At4g25770 |   | + |   |   |
| At4g25780 | + | + | + |   |
| At4g25800 | + | + | + |   |
| At4g25830 | + | + | + |   |
| At4g25835 | + | + | + |   |
| At4g25840 | + | + | + |   |
| At4g25860 | + | + | + | + |
| At4g25870 | + | + | + |   |
| At4g25880 | + | + | + |   |
| At4g25890 | + | + | + |   |
| At4g25900 | + | + | + |   |
| At4g25910 | + | + | + |   |
| At4g25940 | + |   |   |   |
| At4g25950 | + |   |   | + |
| At4g25960 | + | + | + |   |
| At4g25970 | + | + | + |   |
| At4g26000 | + | + | + |   |
| At4g26060 | + | + |   |   |
| At4g26070 | + | + | + |   |
| At4g26080 | + | + | + |   |
| At4g26100 | + | + | + |   |
| At4g26110 | + | + | + |   |
| At4g26130 | + | + | + |   |
| At4g26140 | + | + |   |   |
| At4g26150 | + | + | + |   |
| At4g26160 | + | + | + |   |
| At4g26190 | + | + | + |   |
| At4g26210 | + | + | + |   |
| At4g26230 | + | + | + |   |
| At4g26240 | + | + | + |   |
| At4g26260 | + | + | + | + |
| At4g26270 | + | + | + |   |
| At4g26300 | + | + | + |   |
| At4g26310 | + | + | + |   |
| At4g26320 |   | + | + |   |
| At4g26370 | + | + | + |   |
| At4g26390 | + |   |   | + |
| At4g26400 | + | + | + |   |
| At4g26410 | + | + | + |   |
| At4g26430 | + | + | + |   |
| At4g26440 | + |   |   | + |
| At4g26480 | + | + | + |   |

|           |   |   |   |   |
|-----------|---|---|---|---|
| At4g26490 | + | + |   |   |
| At4g26500 | + | + | + |   |
| At4g26510 | + | + | + |   |
| At4g26520 | + | + | + |   |
| At4g26530 | + | + | + |   |
| At4g26550 | + | + | + |   |
| At4g26555 | + | + | + |   |
| At4g26570 | + | + | + |   |
| At4g26590 | + | + | + | + |
| At4g26600 | + | + | + |   |
| At4g26610 | + | + | + |   |
| At4g26620 | + | + | + |   |
| At4g26630 | + | + | + |   |
| At4g26640 | + | + | + |   |
| At4g26650 | + | + | + |   |
| At4g26660 | + |   |   |   |
| At4g26670 | + | + | + |   |
| At4g26690 | + | + | + |   |
| At4g26700 | + | + | + |   |
| At4g26710 | + | + | + |   |
| At4g26720 | + | + | + |   |
| At4g26750 | + | + | + |   |
| At4g26760 | + | + | + |   |
| At4g26770 | + |   |   |   |
| At4g26780 | + | + | + |   |
| At4g26790 | + | + | + |   |
| At4g26830 | + | + |   |   |
| At4g26840 | + | + | + |   |
| At4g26850 | + | + | + |   |
| At4g26860 | + | + | + |   |
| At4g26870 | + | + | + |   |
| At4g26900 | + | + | + |   |
| At4g26910 | + | + | + |   |
| At4g26940 | + | + | + |   |
| At4g26970 | + | + | + |   |
| At4g26980 | + | + | + |   |
| At4g27000 | + | + | + |   |
| At4g27010 | + | + | + |   |
| At4g27030 | + | + | + |   |
| At4g27040 | + | + | + |   |
| At4g27050 | + | + | + |   |
| At4g27060 | + | + | + |   |
| At4g27070 | + | + | + |   |
| At4g27080 | + | + | + |   |
| At4g27090 | + | + | + |   |
| At4g27110 | + | + |   | + |
| At4g27120 | + | + | + |   |
| At4g27130 | + | + | + |   |
| At4g27180 | + | + | + |   |
| At4g27230 | + | + | + |   |
| At4g27240 | + | + | + |   |
| At4g27250 | + | + | + |   |

|           |   |   |   |   |
|-----------|---|---|---|---|
| At4g27260 | + | + | + |   |
| At4g27270 | + | + | + |   |
| At4g27280 | + | + | + |   |
| At4g27300 |   | + | + |   |
| At4g27320 | + | + | + |   |
| At4g27330 | + |   |   | + |
| At4g27340 | + | + | + |   |
| At4g27350 | + | + | + |   |
| At4g27370 | + | + | + |   |
| At4g27380 | + | + | + |   |
| At4g27390 | + | + | + |   |
| At4g27410 | + | + | + |   |
| At4g27420 | + |   |   | + |
| At4g27430 | + | + | + |   |
| At4g27435 | + | + | + |   |
| At4g27440 | + | + | + |   |
| At4g27450 | + | + | + |   |
| At4g27460 | + |   |   |   |
| At4g27470 | + | + | + |   |
| At4g27480 | + | + | + |   |
| At4g27490 | + | + | + |   |
| At4g27500 | + | + | + |   |
| At4g27510 |   | + | + |   |
| At4g27520 | + | + | + |   |
| At4g27540 | + | + |   |   |
| At4g27550 |   |   | + |   |
| At4g27570 | + | + | + |   |
| At4g27580 | + | + | + | + |
| At4g27590 | + |   |   |   |
| At4g27600 | + | + | + |   |
| At4g27620 | + |   | + |   |
| At4g27630 | + | + | + |   |
| At4g27640 | + | + | + |   |
| At4g27650 | + | + | + |   |
| At4g27652 | + | + | + |   |
| At4g27680 | + | + | + |   |
| At4g27690 | + | + | + |   |
| At4g27700 | + | + | + |   |
| At4g27710 | + | + | + |   |
| At4g27720 | + | + | + |   |
| At4g27730 | + |   |   | + |
| At4g27750 | + | + | + |   |
| At4g27760 | + | + | + |   |
| At4g27780 | + | + | + |   |
| At4g27790 | + | + |   | + |
| At4g27800 | + | + | + |   |
| At4g27820 | + | + | + |   |
| At4g27830 | + | + | + |   |
| At4g27840 | + | + | + |   |
| At4g27850 |   |   | + |   |
| At4g27880 | + | + | + |   |
| At4g27890 | + | + | + |   |



|           |   |   |   |   |
|-----------|---|---|---|---|
| At4g27900 | + | + | + |   |
| At4g27910 | + | + | + |   |
| At4g27940 | + | + | + |   |
| At4g27960 | + | + | + |   |
| At4g27980 | + | + | + |   |
| At4g27990 | + | + | + |   |
| At4g28000 | + |   |   | + |
| At4g28010 | + | + | + |   |
| At4g28020 | + | + | + |   |
| At4g28025 | + | + | + |   |
| At4g28030 | + | + | + |   |
| At4g28040 |   | + |   |   |
| At4g28050 | + | + | + |   |
| At4g28080 | + | + | + |   |
| At4g28085 |   | + | + |   |
| At4g28090 | + |   |   | + |
| At4g28100 | + | + | + |   |
| At4g28120 | + |   |   |   |
| At4g28150 | + |   |   |   |
| At4g28180 | + |   | + |   |
| At4g28190 | + | + | + |   |
| At4g28200 | + | + | + |   |
| At4g28210 | + | + | + |   |
| At4g28220 | + | + | + |   |
| At4g28240 | + | + | + |   |
| At4g28250 | + | + | + |   |
| At4g28260 | + | + | + |   |
| At4g28270 | + | + | + |   |
| At4g28280 | + | + | + | + |
| At4g28290 | + | + | + |   |
| At4g28300 | + | + | + |   |
| At4g28310 | + | + | + |   |
| At4g28330 | + |   | + | + |
| At4g28360 | + | + | + |   |
| At4g28370 | + | + | + |   |
| At4g28390 | + | + | + |   |
| At4g28395 | + |   |   | + |
| At4g28400 | + | + | + |   |
| At4g28440 | + | + | + |   |
| At4g28450 | + | + | + |   |
| At4g28460 |   | + |   |   |
| At4g28470 | + | + | + |   |
| At4g28480 | + | + | + |   |
| At4g28490 | + | + | + |   |
| At4g28500 | + |   |   | + |
| At4g28510 | + | + | + |   |
| At4g28530 | + | + | + |   |
| At4g28540 | + | + | + |   |
| At4g28550 | + |   |   |   |
| At4g28560 |   |   | + | + |
| At4g28570 | + | + | + |   |
| At4g28580 | + |   |   | + |

|           |   |   |   |   |
|-----------|---|---|---|---|
| At4g28590 | + | + | + |   |
| At4g28600 | + | + | + |   |
| At4g28610 | + | + | + |   |
| At4g28620 | + |   | + |   |
| At4g28640 | + | + | + |   |
| At4g28660 | + | + | + |   |
| At4g28680 | + | + | + | + |
| At4g28700 | + |   |   | + |
| At4g28706 | + | + | + |   |
| At4g28710 | + |   |   |   |
| At4g28720 |   | + |   |   |
| At4g28740 | + | + | + |   |
| At4g28750 | + | + | + |   |
| At4g28760 | + | + | + |   |
| At4g28770 | + | + | + |   |
| At4g28780 | + | + | + |   |
| At4g28820 |   | + |   |   |
| At4g28830 | + | + | + |   |
| At4g28860 | + | + | + |   |
| At4g28910 | + | + | + |   |
| At4g28950 | + | + | + |   |
| At4g28980 | + | + | + |   |
| At4g28990 | + | + | + |   |
| At4g29000 | + | + | + |   |
| At4g29010 | + | + | + |   |
| At4g29020 | + | + | + |   |
| At4g29030 | + | + | + |   |
| At4g29040 | + | + | + |   |
| At4g29060 | + | + | + |   |
| At4g29070 | + | + | + |   |
| At4g29080 | + | + | + |   |
| At4g29100 | + | + | + |   |
| At4g29120 | + | + | + |   |
| At4g29130 | + | + | + |   |
| At4g29160 | + | + | + |   |
| At4g29170 |   | + |   |   |
| At4g29190 | + | + | + |   |
| At4g29210 | + | + | + |   |
| At4g29220 | + | + | + |   |
| At4g29240 | + | + | + |   |
| At4g29250 | + |   |   | + |
| At4g29260 | + | + | + |   |
| At4g29285 |   | + | + |   |
| At4g29330 | + | + | + |   |
| At4g29340 | + | + | + |   |
| At4g29350 | + | + | + |   |
| At4g29360 | + | + | + |   |
| At4g29380 | + | + | + |   |
| At4g29390 | + | + | + |   |
| At4g29410 | + | + | + |   |
| At4g29420 | + | + | + |   |
| At4g29430 | + | + | + |   |

|           |   |   |   |   |
|-----------|---|---|---|---|
| At4g29440 | + | + | + |   |
| At4g29480 | + | + | + |   |
| At4g29490 | + | + | + |   |
| At4g29500 | + | + | + |   |
| At4g29510 | + | + | + |   |
| At4g29520 | + | + | + |   |
| At4g29530 | + | + | + |   |
| At4g29550 | + |   |   |   |
| At4g29560 |   | + |   |   |
| At4g29590 | + | + | + |   |
| At4g29640 |   |   | + |   |
| At4g29650 |   |   | + | + |
| At4g29660 | + | + | + |   |
| At4g29670 | + | + | + |   |
| At4g29680 | + | + | + |   |
| At4g29700 | + |   |   |   |
| At4g29720 | + | + | + |   |
| At4g29735 | + | + | + |   |
| At4g29750 | + | + | + |   |
| At4g29770 | + | + | + |   |
| At4g29780 | + | + | + |   |
| At4g29790 | + | + | + |   |
| At4g29810 | + | + | + |   |
| At4g29820 | + | + | + |   |
| At4g29830 | + | + | + |   |
| At4g29840 | + | + | + |   |
| At4g29870 | + | + | + |   |
| At4g29890 | + | + | + |   |
| At4g29900 | + | + | + |   |
| At4g29910 | + | + | + |   |
| At4g29940 | + | + | + |   |
| At4g29950 | + | + | + |   |
| At4g29960 | + | + | + |   |
| At4g29980 | + |   |   | + |
| At4g30000 | + | + | + |   |
| At4g30010 | + | + | + |   |
| At4g30020 | + | + | + |   |
| At4g30040 | + |   |   | + |
| At4g30050 | + |   |   |   |
| At4g30070 |   |   | + | + |
| At4g30080 | + | + | + |   |
| At4g30110 | + |   |   |   |
| At4g30130 | + | + | + | + |
| At4g30140 | + | + |   |   |
| At4g30150 | + | + | + |   |
| At4g30160 | + | + | + |   |
| At4g30190 | + | + | + |   |
| At4g30200 | + | + | + |   |
| At4g30210 | + | + | + |   |
| At4g30220 | + | + | + |   |
| At4g30270 | + | + | + |   |
| At4g30280 |   | + |   |   |

|           |   |   |   |   |
|-----------|---|---|---|---|
| At4g30290 |   | + |   |   |
| At4g30310 | + | + | + |   |
| At4g30330 | + | + | + |   |
| At4g30340 | + | + | + |   |
| At4g30350 | + | + | + |   |
| At4g30360 | + | + | + |   |
| At4g30390 | + | + | + |   |
| At4g30400 | + | + | + |   |
| At4g30410 |   |   | + |   |
| At4g30420 | + | + |   |   |
| At4g30430 | + | + | + | + |
| At4g30440 | + | + | + |   |
| At4g30450 | + | + | + |   |
| At4g30460 | + | + | + |   |
| At4g30470 | + | + | + |   |
| At4g30480 | + | + | + |   |
| At4g30490 | + | + | + |   |
| At4g30500 | + | + | + |   |
| At4g30520 | + | + | + |   |
| At4g30530 | + | + | + |   |
| At4g30550 | + | + | + |   |
| At4g30560 | + | + |   |   |
| At4g30570 | + |   |   | + |
| At4g30580 | + | + | + |   |
| At4g30590 | + | + | + |   |
| At4g30600 | + | + | + |   |
| At4g30610 | + | + | + |   |
| At4g30620 | + | + | + |   |
| At4g30630 | + | + | + |   |
| At4g30650 | + |   | + |   |
| At4g30660 | + | + | + |   |
| At4g30670 | + | + |   |   |
| At4g30680 |   | + | + |   |
| At4g30690 | + | + | + |   |
| At4g30700 | + | + | + |   |
| At4g30720 | + | + | + |   |
| At4g30740 | + | + | + |   |
| At4g30750 | + | + | + |   |
| At4g30760 | + | + | + |   |
| At4g30790 | + | + | + |   |
| At4g30800 | + | + | + |   |
| At4g30810 | + | + | + |   |
| At4g30820 | + | + | + |   |
| At4g30825 | + | + | + |   |
| At4g30840 | + | + | + |   |
| At4g30850 | + | + | + |   |
| At4g30860 | + | + | + |   |
| At4g30890 | + | + | + |   |
| At4g30900 | + | + | + |   |
| At4g30910 | + | + | + |   |
| At4g30930 | + | + | + |   |
| At4g30935 | + | + | + |   |

|           |   |   |   |
|-----------|---|---|---|
| At4g30940 | + |   |   |
| At4g30950 | + | + | + |
| At4g30960 | + | + | + |
| At4g30990 | + | + | + |
| At4g30993 | + | + | + |
| At4g30996 | + | + | + |
| At4g31000 | + | + | + |
| At4g31010 | + | + | + |
| At4g31020 | + | + | + |
| At4g31030 | + | + | + |
| At4g31040 | + | + | + |
| At4g31050 | + | + | + |
| At4g31060 | + |   | + |
| At4g31080 | + | + | + |
| At4g31090 | + | + | + |
| At4g31110 | + |   |   |
| At4g31120 | + | + | + |
| At4g31130 | + | + | + |
| At4g31140 | + | + | + |
| At4g31150 | + | + | + |
| At4g31160 | + | + | + |
| At4g31170 | + | + | + |
| At4g31180 | + | + | + |
| At4g31200 | + | + | + |
| At4g31210 | + | + | + |
| At4g31240 | + | + | + |
| At4g31270 | + |   | + |
| At4g31290 | + | + | + |
| At4g31300 | + | + | + |
| At4g31310 | + | + | + |
| At4g31330 | + |   | + |
| At4g31340 | + | + | + |
| At4g31360 | + | + | + |
| At4g31390 | + | + | + |
| At4g31400 |   |   | + |
| At4g31410 | + | + | + |
| At4g31420 | + | + | + |
| At4g31430 | + | + | + |
| At4g31450 | + | + | + |
| At4g31460 | + | + | + |
| At4g31480 | + | + | + |
| At4g31500 |   | + |   |
| At4g31530 | + | + | + |
| At4g31540 | + | + | + |
| At4g31550 | + | + | + |
| At4g31560 | + | + | + |
| At4g31570 | + | + | + |
| At4g31580 | + | + | + |
| At4g31590 | + | + | + |
| At4g31600 | + | + | + |
| At4g31610 | + |   | + |
| At4g31670 | + | + | + |

|           |   |   |   |   |
|-----------|---|---|---|---|
| At4g31700 | + | + | + |   |
| At4g31710 | + | + |   |   |
| At4g31720 | + | + | + |   |
| At4g31730 |   | + | + |   |
| At4g31750 | + | + | + |   |
| At4g31770 | + | + | + |   |
| At4g31780 | + | + | + |   |
| At4g31790 | + | + | + |   |
| At4g31800 | + | + | + |   |
| At4g31805 | + |   |   |   |
| At4g31810 | + | + | + |   |
| At4g31820 | + | + | + |   |
| At4g31840 | + | + | + |   |
| At4g31850 | + | + | + |   |
| At4g31860 | + | + | + |   |
| At4g31870 | + | + | + |   |
| At4g31880 | + | + | + |   |
| At4g31890 | + |   | + |   |
| At4g31910 | + | + |   |   |
| At4g31920 | + | + | + |   |
| At4g31930 | + | + | + |   |
| At4g31980 | + | + |   |   |
| At4g31985 | + | + | + |   |
| At4g31990 | + | + | + |   |
| At4g32000 | + | + | + |   |
| At4g32010 | + | + | + |   |
| At4g32020 | + | + | + |   |
| At4g32030 | + | + | + |   |
| At4g32040 | + | + | + |   |
| At4g32050 | + | + | + |   |
| At4g32060 | + | + | + |   |
| At4g32070 | + | + | + |   |
| At4g32105 | + |   | + |   |
| At4g32120 | + | + | + |   |
| At4g32130 | + | + | + |   |
| At4g32140 | + | + | + |   |
| At4g32150 | + | + | + |   |
| At4g32160 | + | + | + |   |
| At4g32170 | + | + | + | + |
| At4g32180 | + | + | + |   |
| At4g32190 | + | + | + |   |
| At4g32210 | + | + | + |   |
| At4g32230 |   | + |   |   |
| At4g32240 | + | + | + |   |
| At4g32250 | + | + | + |   |
| At4g32260 | + | + | + |   |
| At4g32270 | + | + | + |   |
| At4g32290 | + |   |   |   |
| At4g32300 | + | + | + |   |
| At4g32320 | + | + | + |   |
| At4g32330 | + | + | + |   |
| At4g32340 | + | + |   |   |

|           |   |   |   |   |
|-----------|---|---|---|---|
| At4g32350 | + | + | + |   |
| At4g32360 | + | + | + |   |
| At4g32390 | + | + | + |   |
| At4g32400 | + | + | + |   |
| At4g32410 | + | + | + |   |
| At4g32420 | + | + | + |   |
| At4g32440 | + | + | + |   |
| At4g32450 | + | + | + |   |
| At4g32460 | + | + | + |   |
| At4g32470 | + | + | + |   |
| At4g32490 |   |   | + |   |
| At4g32500 | + |   |   | + |
| At4g32520 | + | + | + |   |
| At4g32530 | + | + | + |   |
| At4g32551 | + | + | + |   |
| At4g32560 | + | + | + |   |
| At4g32570 | + | + | + |   |
| At4g32590 | + | + | + |   |
| At4g32600 | + | + | + |   |
| At4g32610 | + | + | + |   |
| At4g32620 | + | + | + |   |
| At4g32630 | + | + |   |   |
| At4g32640 | + | + | + |   |
| At4g32660 | + | + | + |   |
| At4g32680 | + | + | + |   |
| At4g32690 |   | + |   |   |
| At4g32700 | + |   |   |   |
| At4g32710 | + | + | + |   |
| At4g32720 | + | + | + |   |
| At4g32740 | + | + | + |   |
| At4g32750 | + | + |   |   |
| At4g32760 | + | + | + |   |
| At4g32770 | + | + | + |   |
| At4g32810 | + | + | + |   |
| At4g32830 | + | + | + |   |
| At4g32840 | + | + | + |   |
| At4g32850 | + | + | + |   |
| At4g32870 | + | + | + |   |
| At4g32880 | + |   | + |   |
| At4g32890 | + |   |   |   |
| At4g32900 | + | + | + |   |
| At4g32910 | + | + | + |   |
| At4g32915 | + | + | + |   |
| At4g32920 | + | + | + |   |
| At4g32930 | + | + | + |   |
| At4g32940 | + | + | + |   |
| At4g32960 | + | + | + |   |
| At4g32970 | + |   | + |   |
| At4g32980 | + | + | + |   |
| At4g33000 | + | + | + |   |
| At4g33010 | + | + | + |   |
| At4g33020 |   | + |   |   |

|           |   |   |   |   |
|-----------|---|---|---|---|
| At4g33030 | + | + | + |   |
| At4g33040 | + | + | + |   |
| At4g33050 | + | + | + |   |
| At4g33060 | + | + | + |   |
| At4g33070 | + |   |   |   |
| At4g33080 | + | + | + |   |
| At4g33090 | + | + | + |   |
| At4g33100 | + | + | + |   |
| At4g33110 | + | + | + |   |
| At4g33130 |   | + | + | + |
| At4g33140 | + | + | + |   |
| At4g33150 | + | + | + |   |
| At4g33160 | + |   | + |   |
| At4g33170 |   | + |   |   |
| At4g33180 | + | + | + |   |
| At4g33190 | + | + | + |   |
| At4g33200 | + | + | + |   |
| At4g33210 | + | + | + |   |
| At4g33220 | + | + | + |   |
| At4g33230 |   | + |   | + |
| At4g33240 | + | + | + |   |
| At4g33250 | + | + | + |   |
| At4g33260 | + | + | + |   |
| At4g33300 | + | + | + |   |
| At4g33350 | + | + | + |   |
| At4g33360 | + | + | + |   |
| At4g33380 | + | + | + |   |
| At4g33390 | + |   |   | + |
| At4g33400 | + | + | + |   |
| At4g33410 | + | + | + |   |
| At4g33420 | + | + | + |   |
| At4g33430 | + | + | + |   |
| At4g33440 | + | + | + |   |
| At4g33460 | + | + | + |   |
| At4g33470 | + | + | + |   |
| At4g33480 | + | + | + |   |
| At4g33490 | + | + | + |   |
| At4g33500 | + | + | + |   |
| At4g33510 | + | + | + |   |
| At4g33520 | + | + | + |   |
| At4g33525 | + | + | + |   |
| At4g33530 | + | + | + |   |
| At4g33540 | + | + | + |   |
| At4g33550 |   |   | + |   |
| At4g33560 |   |   | + |   |
| At4g33570 | + |   |   |   |
| At4g33580 | + | + | + |   |
| At4g33630 | + | + | + |   |
| At4g33640 | + | + | + |   |
| At4g33650 | + | + | + |   |
| At4g33660 | + | + | + |   |
| At4g33660 |   |   | + |   |



|           |   |   |   |   |
|-----------|---|---|---|---|
| At4g33666 | + | + | + |   |
| At4g33670 | + | + | + |   |
| At4g33680 | + | + | + |   |
| At4g33690 | + | + | + |   |
| At4g33700 | + | + | + |   |
| At4g33750 | + | + | + |   |
| At4g33760 | + | + | + |   |
| At4g33770 |   | + |   |   |
| At4g33780 | + | + | + |   |
| At4g33790 | + | + | + |   |
| At4g33810 | + |   | + |   |
| At4g33830 |   |   | + |   |
| At4g33865 | + | + | + |   |
| At4g33870 | + |   | + |   |
| At4g33890 | + | + | + |   |
| At4g33905 | + | + | + |   |
| At4g33910 | + | + | + |   |
| At4g33920 | + | + | + |   |
| At4g33940 | + | + | + |   |
| At4g33950 | + | + | + |   |
| At4g33960 | + | + |   |   |
| At4g33970 |   | + |   | + |
| At4g33980 | + |   |   |   |
| At4g34000 | + | + | + |   |
| At4g34020 |   |   | + |   |
| At4g34030 | + | + | + |   |
| At4g34040 | + | + | + |   |
| At4g34050 | + | + | + |   |
| At4g34080 | + | + | + |   |
| At4g34090 | + | + | + |   |
| At4g34100 | + | + | + |   |
| At4g34110 | + | + | + |   |
| At4g34120 | + | + | + |   |
| At4g34135 | + | + |   |   |
| At4g34138 | + | + | + |   |
| At4g34140 | + | + | + |   |
| At4g34150 | + | + | + |   |
| At4g34160 | + | + | + |   |
| At4g34180 | + | + | + |   |
| At4g34190 | + | + | + |   |
| At4g34200 | + | + | + |   |
| At4g34210 | + |   |   | + |
| At4g34215 | + | + | + |   |
| At4g34220 | + | + | + |   |
| At4g34230 | + | + | + |   |
| At4g34240 | + | + | + |   |
| At4g34250 | + | + |   |   |
| At4g34260 | + | + | + |   |
| At4g34265 | + | + | + |   |
| At4g34270 | + | + | + |   |
| At4g34290 | + | + | + |   |
| At4g34310 | + | + | + |   |

|           |   |   |   |   |
|-----------|---|---|---|---|
| At4g34320 | + | + | + |   |
| At4g34340 | + | + | + |   |
| At4g34350 | + | + | + |   |
| At4g34360 | + | + | + |   |
| At4g34370 | + | + | + |   |
| At4g34390 | + | + | + |   |
| At4g34400 | + |   |   | + |
| At4g34410 | + |   |   |   |
| At4g34430 | + | + | + |   |
| At4g34430 | + | + | + |   |
| At4g34440 | + | + |   |   |
| At4g34450 | + | + | + |   |
| At4g34460 | + | + | + |   |
| At4g34480 | + | + | + |   |
| At4g34490 | + | + | + |   |
| At4g34500 | + | + | + |   |
| At4g34510 | + |   |   | + |
| At4g34540 | + | + | + |   |
| At4g34555 | + | + | + |   |
| At4g34560 | + |   | + |   |
| At4g34590 | + | + | + |   |
| At4g34610 | + | + | + |   |
| At4g34620 | + | + | + |   |
| At4g34630 | + | + | + |   |
| At4g34640 | + | + | + |   |
| At4g34660 | + | + | + |   |
| At4g34670 | + | + | + |   |
| At4g34680 | + | + | + |   |
| At4g34700 | + | + | + |   |
| At4g34710 | + | + | + |   |
| At4g34720 | + | + | + |   |
| At4g34730 | + | + | + |   |
| At4g34740 | + | + | + |   |
| At4g34750 | + | + | + |   |
| At4g34760 | + | + | + |   |
| At4g34820 | + | + | + |   |
| At4g34830 | + | + | + |   |
| At4g34840 | + | + | + |   |
| At4g34850 | + |   |   | + |
| At4g34860 | + | + | + |   |
| At4g34870 | + | + | + |   |
| At4g34890 | + | + | + |   |
| At4g34910 | + | + | + |   |
| At4g34920 | + | + | + |   |
| At4g34940 | + | + | + |   |
| At4g34950 |   | + | + |   |
| At4g34960 | + | + | + |   |
| At4g34970 |   | + |   |   |
| At4g34980 | + | + | + |   |
| At4g34990 | + | + | + |   |
| At4g35000 | + | + | + |   |
| At4g35010 | + | + | + | + |

|           |   |   |   |   |
|-----------|---|---|---|---|
| At4g35020 | + | + | + |   |
| At4g35030 | + | + | + |   |
| At4g35040 | + | + | + |   |
| At4g35050 | + | + | + |   |
| At4g35060 | + | + | + |   |
| At4g35070 | + |   |   | + |
| At4g35090 | + | + | + |   |
| At4g35110 | + | + | + |   |
| At4g35140 | + | + | + |   |
| At4g35150 | + | + |   |   |
| At4g35180 | + | + | + | + |
| At4g35190 | + | + | + |   |
| At4g35220 | + | + | + |   |
| At4g35230 | + | + | + |   |
| At4g35240 | + | + | + |   |
| At4g35250 | + | + | + |   |
| At4g35260 | + | + | + |   |
| At4g35270 | + |   | + |   |
| At4g35280 | + |   |   |   |
| At4g35290 |   |   | + |   |
| At4g35300 | + | + | + |   |
| At4g35310 | + | + | + |   |
| At4g35320 | + | + | + |   |
| At4g35330 | + | + | + |   |
| At4g35340 | + | + | + |   |
| At4g35350 | + | + | + |   |
| At4g35360 | + | + | + |   |
| At4g35380 | + |   |   |   |
| At4g35410 | + | + | + |   |
| At4g35420 | + |   |   | + |
| At4g35440 | + | + | + |   |
| At4g35450 | + | + | + |   |
| At4g35470 | + | + | + |   |
| At4g35480 | + | + |   |   |
| At4g35490 | + | + | + |   |
| At4g35500 | + | + | + |   |
| At4g35510 | + |   | + |   |
| At4g35530 | + | + | + |   |
| At4g35540 | + | + | + |   |
| At4g35550 | + | + | + |   |
| At4g35560 | + |   |   |   |
| At4g35570 | + | + | + |   |
| At4g35580 | + | + | + |   |
| At4g35600 | + | + | + |   |
| At4g35620 | + | + | + |   |
| At4g35630 | + | + | + |   |
| At4g35650 | + |   |   | + |
| At4g35670 | + |   |   | + |
| At4g35700 | + | + |   | + |
| At4g35725 |   | + | + | + |
| At4g35730 | + | + | + |   |
| At4g35740 | + | + | + |   |

|           |   |   |   |   |
|-----------|---|---|---|---|
| At4g35750 | + | + | + |   |
| At4g35760 | + | + | + |   |
| At4g35770 | + | + | + |   |
| At4g35780 | + | + | + |   |
| At4g35790 | + | + | + |   |
| At4g35800 | + | + | + |   |
| At4g35830 | + | + | + |   |
| At4g35840 | + | + | + |   |
| At4g35850 | + | + | + |   |
| At4g35860 | + | + | + |   |
| At4g35870 | + | + | + |   |
| At4g35880 | + | + | + |   |
| At4g35890 | + | + | + |   |
| At4g35905 | + | + | + |   |
| At4g35910 | + | + | + |   |
| At4g35920 | + | + | + |   |
| At4g35930 |   |   | + |   |
| At4g35940 | + | + | + |   |
| At4g35950 | + | + | + |   |
| At4g35970 | + | + | + |   |
| At4g35980 | + | + | + |   |
| At4g35985 |   |   | + |   |
| At4g35990 | + | + | + |   |
| At4g36010 | + | + | + |   |
| At4g36020 | + | + | + |   |
| At4g36030 | + | + |   |   |
| At4g36040 | + | + | + |   |
| At4g36050 | + | + | + |   |
| At4g36105 | + | + | + |   |
| At4g36110 |   | + | + |   |
| At4g36140 | + | + | + |   |
| At4g36160 | + | + | + |   |
| At4g36180 | + | + | + |   |
| At4g36190 | + | + | + |   |
| At4g36210 | + | + | + |   |
| At4g36220 |   | + |   |   |
| At4g36250 | + | + | + |   |
| At4g36260 | + |   |   | + |
| At4g36270 | + | + | + | + |
| At4g36290 | + | + | + |   |
| At4g36350 | + |   |   | + |
| At4g36360 | + | + | + |   |
| At4g36380 | + | + | + |   |
| At4g36390 | + | + | + |   |
| At4g36400 | + | + | + |   |
| At4g36410 | + | + | + |   |
| At4g36420 | + | + | + |   |
| At4g36440 | + | + | + |   |
| At4g36480 | + | + | + |   |
| At4g36490 | + | + | + | + |
| At4g36500 | + | + | + |   |
| At4g36520 | + | + | + |   |

|           |   |   |   |   |
|-----------|---|---|---|---|
| At4g36530 | + | + | + |   |
| At4g36540 | + | + | + |   |
| At4g36550 | + | + | + |   |
| At4g36580 |   | + |   | + |
| At4g36590 |   |   | + |   |
| At4g36600 | + |   |   | + |
| At4g36610 |   | + | + |   |
| At4g36620 | + |   |   |   |
| At4g36630 | + | + | + |   |
| At4g36640 | + | + | + |   |
| At4g36650 | + | + | + |   |
| At4g36660 | + | + | + |   |
| At4g36670 |   | + |   |   |
| At4g36680 | + |   | + |   |
| At4g36690 | + | + | + |   |
| At4g36710 | + | + | + |   |
| At4g36730 | + | + | + |   |
| At4g36750 | + | + | + |   |
| At4g36760 | + | + | + |   |
| At4g36770 |   | + |   | + |
| At4g36780 | + | + | + |   |
| At4g36790 | + | + | + |   |
| At4g36800 | + | + | + |   |
| At4g36810 | + | + | + |   |
| At4g36860 | + | + | + |   |
| At4g36870 | + |   |   |   |
| At4g36880 | + | + | + |   |
| At4g36890 | + | + | + |   |
| At4g36910 | + | + | + |   |
| At4g36920 | + | + | + |   |
| At4g36930 | + | + | + |   |
| At4g36940 | + | + | + |   |
| At4g36960 | + | + | + |   |
| At4g36970 | + | + | + |   |
| At4g36980 | + | + | + |   |
| At4g36990 | + | + | + |   |
| At4g37000 | + | + | + |   |
| At4g37020 | + | + | + |   |
| At4g37040 | + | + | + |   |
| At4g37050 | + |   | + |   |
| At4g37080 | + | + | + |   |
| At4g37090 | + | + | + |   |
| At4g37110 | + | + | + |   |
| At4g37120 | + | + | + |   |
| At4g37130 | + | + | + |   |
| At4g37150 |   | + |   |   |
| At4g37180 | + | + | + |   |
| At4g37190 | + | + | + |   |
| At4g37200 | + | + | + |   |
| At4g37210 | + | + | + |   |
| At4g37240 | + | + | + |   |
| At4g37250 | + | + | + |   |

|           |   |   |   |
|-----------|---|---|---|
| At4g37260 | + | + | + |
| At4g37270 | + | + | + |
| At4g37280 | + | + | + |
| At4g37300 | + | + | + |
| At4g37310 | + | + | + |
| At4g37330 | + | + | + |
| At4g37360 |   |   | + |
| At4g37370 |   | + | + |
| At4g37430 | + | + | + |
| At4g37445 | + |   | + |
| At4g37450 | + | + | + |
| At4g37460 | + | + | + |
| At4g37470 | + | + | + |
| At4g37480 | + | + | + |
| At4g37490 | + | + | + |
| At4g37510 | + | + | + |
| At4g37530 | + | + | + |
| At4g37540 | + | + | + |
| At4g37550 | + | + | + |
| At4g37560 | + | + | + |
| At4g37590 | + | + | + |
| At4g37610 | + | + | + |
| At4g37630 | + | + | + |
| At4g37640 | + | + | + |
| At4g37650 | + | + | + |
| At4g37660 | + | + | + |
| At4g37680 | + | + | + |
| At4g37680 | + | + | + |
| At4g37730 | + |   |   |
| At4g37740 | + | + | + |
| At4g37750 | + | + | + |
| At4g37760 | + | + | + |
| At4g37790 | + | + | + |
| At4g37800 |   | + | + |
| At4g37820 | + | + | + |
| At4g37830 | + | + | + |
| At4g37870 | + | + | + |
| At4g37880 | + | + | + |
| At4g37890 | + | + | + |
| At4g37900 | + |   |   |
| At4g37910 | + | + | + |
| At4g37930 | + | + | + |
| At4g37980 | + | + | + |
| At4g37990 | + | + | + |
| At4g38000 | + |   |   |
| At4g38010 | + |   |   |
| At4g38020 | + | + | + |
| At4g38040 | + | + | + |
| At4g38050 | + | + | + |
| At4g38060 | + | + | + |
| At4g38070 | + | + |   |
| At4g38080 |   |   | + |

|           |   |   |   |   |
|-----------|---|---|---|---|
| At4g38090 | + | + | + |   |
| At4g38100 | + | + | + |   |
| At4g38110 | + | + | + |   |
| At4g38130 | + | + | + |   |
| At4g38150 | + | + | + |   |
| At4g38160 | + | + | + |   |
| At4g38170 | + | + | + |   |
| At4g38180 | + | + | + |   |
| At4g38190 | + | + | + | + |
| At4g38200 | + | + | + |   |
| At4g38220 | + | + | + |   |
| At4g38225 | + | + | + |   |
| At4g38230 | + | + | + |   |
| At4g38240 | + | + | + |   |
| At4g38250 | + | + | + |   |
| At4g38260 | + | + |   |   |
| At4g38270 | + | + | + |   |
| At4g38290 | + | + | + |   |
| At4g38300 | + | + | + |   |
| At4g38350 | + | + | + |   |
| At4g38360 | + | + | + |   |
| At4g38370 | + | + | + |   |
| At4g38390 | + |   |   |   |
| At4g38400 | + | + | + |   |
| At4g38430 | + | + | + |   |
| At4g38440 | + | + | + |   |
| At4g38460 | + | + | + |   |
| At4g38470 | + | + | + |   |
| At4g38490 | + | + | + |   |
| At4g38500 | + | + | + |   |
| At4g38510 | + | + | + |   |
| At4g38520 | + | + | + |   |
| At4g38530 | + | + | + |   |
| At4g38540 |   | + | + |   |
| At4g38550 | + | + |   |   |
| At4g38570 | + | + | + |   |
| At4g38580 | + | + | + |   |
| At4g38600 | + | + | + |   |
| At4g38610 | + | + | + |   |
| At4g38620 | + | + | + |   |
| At4g38630 | + | + | + |   |
| At4g38640 | + | + | + |   |
| At4g38660 | + | + | + |   |
| At4g38670 | + |   |   |   |
| At4g38680 | + | + | + |   |
| At4g38690 | + | + | + |   |
| At4g38700 | + | + | + |   |
| At4g38710 | + | + | + |   |
| At4g38740 | + | + | + |   |
| At4g38750 | + | + | + |   |
| At4g38770 | + | + | + |   |
| At4g38780 | + | + | + |   |

|           |   |   |   |   |
|-----------|---|---|---|---|
| At4g38800 | + | + | + |   |
| At4g38810 | + | + | + |   |
| At4g38840 | + | + | + |   |
| At4g38850 |   |   | + |   |
| At4g38860 | + | + | + |   |
| At4g38890 | + | + | + |   |
| At4g38900 | + | + | + |   |
| At4g38920 | + | + | + |   |
| At4g38930 | + | + | + |   |
| At4g38940 | + | + | + |   |
| At4g38950 | + | + | + |   |
| At4g38960 | + | + | + |   |
| At4g38970 | + | + | + |   |
| At4g38980 | + | + |   |   |
| At4g39010 | + |   | + |   |
| At4g39030 |   |   | + |   |
| At4g39040 | + | + | + |   |
| At4g39050 | + | + | + |   |
| At4g39070 | + |   |   |   |
| At4g39080 | + | + | + |   |
| At4g39090 | + | + | + |   |
| At4g39100 | + | + | + |   |
| At4g39110 | + | + | + | + |
| At4g39120 | + | + | + |   |
| At4g39130 | + |   |   | + |
| At4g39140 | + | + | + |   |
| At4g39150 | + | + | + |   |
| At4g39160 | + | + | + |   |
| At4g39170 | + | + | + |   |
| At4g39180 |   | + |   | + |
| At4g39190 | + | + | + |   |
| At4g39200 | + | + | + |   |
| At4g39210 | + | + | + |   |
| At4g39220 | + | + | + |   |
| At4g39230 | + | + | + |   |
| At4g39235 | + | + | + |   |
| At4g39240 | + | + | + |   |
| At4g39260 | + | + | + |   |
| At4g39270 |   |   | + |   |
| At4g39280 | + | + | + |   |
| At4g39300 | + | + | + |   |
| At4g39320 | + |   | + |   |
| At4g39330 | + | + | + |   |
| At4g39350 | + | + | + |   |
| At4g39370 | + | + | + |   |
| At4g39390 | + | + | + |   |
| At4g39400 | + | + | + |   |
| At4g39410 | + |   | + |   |
| At4g39450 | + | + | + |   |
| At4g39460 | + | + | + |   |
| At4g39480 | + | + | + |   |
| At4g39490 |   | + |   | + |



|           |   |   |   |   |
|-----------|---|---|---|---|
| At4g39510 | + | + | + |   |
| At4g39520 | + | + | + |   |
| At4g39530 | + |   | + |   |
| At4g39540 | + | + | + |   |
| At4g39550 | + | + | + |   |
| At4g39560 | + | + | + |   |
| At4g39570 | + | + | + |   |
| At4g39590 | + |   |   | + |
| At4g39610 | + | + |   | + |
| At4g39620 | + | + | + |   |
| At4g39630 | + | + | + |   |
| At4g39640 | + | + | + |   |
| At4g39660 | + | + | + |   |
| At4g39670 | + | + |   |   |
| At4g39680 | + | + | + |   |
| At4g39690 | + | + | + |   |
| At4g39710 | + | + | + |   |
| At4g39720 | + | + | + |   |
| At4g39730 | + | + | + |   |
| At4g39740 | + | + | + |   |
| At4g39753 | + |   |   |   |
| At4g39790 | + | + |   |   |
| At4g39800 | + | + | + |   |
| At4g39820 | + | + | + |   |
| At4g39830 | + | + | + |   |
| At4g39840 | + | + | + |   |
| At4g39850 | + | + | + |   |
| At4g39860 | + | + | + |   |
| At4g39870 | + | + | + |   |
| At4g39880 | + | + | + |   |
| At4g39900 | + | + | + |   |
| At4g39910 | + | + | + |   |
| At4g39920 | + | + | + |   |
| At4g39940 | + | + | + |   |
| At4g39950 |   | + |   |   |
| At4g39955 |   | + | + |   |
| At4g39960 | + | + | + |   |
| At4g39970 | + | + | + |   |
| At4g39980 | + | + | + |   |
| At4g39990 | + | + | + |   |
| At4g40000 | + | + | + |   |
| At4g40010 | + | + | + |   |
| At4g40020 | + | + |   |   |
| At4g40030 | + | + | + |   |
| At4g40040 | + | + | + |   |
| At4g40045 | + | + | + |   |
| At4g40050 | + | + | + |   |
| At4g40060 | + | + | + |   |
| At4g40070 |   |   | + |   |
| At5g01010 | + | + | + |   |
| At5g01015 | + | + | + |   |
| At5g01020 | + | + | + |   |

|           |   |   |   |   |
|-----------|---|---|---|---|
| At5g01030 | + | + | + |   |
| At5g01075 | + | + | + |   |
| At5g01090 | + | + | + |   |
| At5g01160 | + | + | + |   |
| At5g01180 | + | + | + |   |
| At5g01200 | + | + | + |   |
| At5g01210 | + | + | + |   |
| At5g01220 | + | + | + |   |
| At5g01230 | + | + | + |   |
| At5g01240 | + | + | + |   |
| At5g01260 | + | + | + |   |
| At5g01270 | + | + | + |   |
| At5g01290 | + | + | + |   |
| At5g01310 | + | + |   | + |
| At5g01340 | + | + | + |   |
| At5g01350 | + | + | + |   |
| At5g01360 | + |   | + |   |
| At5g01370 | + | + | + |   |
| At5g01380 |   |   | + | + |
| At5g01390 | + | + | + |   |
| At5g01400 | + | + | + |   |
| At5g01410 | + | + | + |   |
| At5g01430 | + | + | + |   |
| At5g01450 | + | + | + |   |
| At5g01460 | + | + | + |   |
| At5g01470 | + | + | + |   |
| At5g01500 | + | + | + |   |
| At5g01510 | + | + | + |   |
| At5g01520 | + | + | + |   |
| At5g01530 | + | + | + |   |
| At5g01540 |   | + | + |   |
| At5g01550 |   |   | + |   |
| At5g01590 | + | + | + |   |
| At5g01600 | + | + | + |   |
| At5g01610 | + | + | + |   |
| At5g01620 | + | + | + |   |
| At5g01650 | + | + | + |   |
| At5g01660 | + | + | + |   |
| At5g01670 | + | + | + |   |
| At5g01700 | + | + |   |   |
| At5g01710 | + | + | + |   |
| At5g01720 | + | + | + |   |
| At5g01730 | + | + | + |   |
| At5g01740 | + | + |   |   |
| At5g01750 | + | + | + |   |
| At5g01770 | + | + | + |   |
| At5g01780 | + | + | + |   |
| At5g01790 | + | + | + |   |
| At5g01800 | + | + | + |   |
| At5g01810 | + | + | + |   |
| At5g01820 | + | + | + |   |
| At5g01850 | + | + | + |   |

|           |   |   |   |   |
|-----------|---|---|---|---|
| At5g01870 | + | + | + |   |
| At5g01880 |   | + |   |   |
| At5g01890 | + | + | + |   |
| At5g01910 | + | + | + |   |
| At5g01920 | + | + | + |   |
| At5g01930 | + | + | + |   |
| At5g01940 | + | + | + |   |
| At5g01950 | + |   |   |   |
| At5g01960 | + | + | + |   |
| At5g01970 | + | + | + |   |
| At5g01980 | + | + | + |   |
| At5g01990 | + | + | + |   |
| At5g02010 | + | + | + |   |
| At5g02020 | + | + |   |   |
| At5g02030 | + | + | + |   |
| At5g02040 | + | + | + |   |
| At5g02050 | + | + | + |   |
| At5g02080 | + | + | + |   |
| At5g02100 | + | + |   |   |
| At5g02120 | + | + | + |   |
| At5g02130 | + |   | + |   |
| At5g02140 | + |   |   | + |
| At5g02150 | + | + | + |   |
| At5g02160 | + | + | + |   |
| At5g02170 | + | + | + |   |
| At5g02180 | + | + | + |   |
| At5g02190 | + | + | + | + |
| At5g02200 |   | + |   |   |
| At5g02220 | + |   |   |   |
| At5g02230 | + | + | + |   |
| At5g02240 | + | + | + |   |
| At5g02250 | + | + | + |   |
| At5g02260 | + | + | + |   |
| At5g02270 | + | + | + |   |
| At5g02280 | + | + | + |   |
| At5g02290 | + | + | + |   |
| At5g02300 | + |   |   |   |
| At5g02310 | + | + | + |   |
| At5g02370 | + | + |   |   |
| At5g02380 | + | + | + |   |
| At5g02410 | + | + | + |   |
| At5g02420 | + | + |   |   |
| At5g02430 | + | + | + |   |
| At5g02440 | + | + | + |   |
| At5g02450 | + | + | + |   |
| At5g02470 | + | + | + |   |
| At5g02480 | + | + | + |   |
| At5g02490 | + | + | + | + |
| At5g02500 | + | + | + |   |
| At5g02520 |   | + | + |   |
| At5g02530 | + | + | + |   |
| At5g02540 | + | + | + |   |

|           |   |   |   |   |
|-----------|---|---|---|---|
| At5g02550 | + | + | + |   |
| At5g02560 | + | + | + |   |
| At5g02570 | + | + | + | + |
| At5g02580 | + | + |   |   |
| At5g02590 | + | + | + |   |
| At5g02600 | + | + | + |   |
| At5g02610 | + | + | + |   |
| At5g02620 | + | + | + |   |
| At5g02630 | + |   |   |   |
| At5g02670 | + | + | + |   |
| At5g02680 | + | + | + |   |
| At5g02690 |   | + | + |   |
| At5g02710 | + | + | + |   |
| At5g02720 | + |   |   |   |
| At5g02740 | + | + | + |   |
| At5g02760 |   | + |   |   |
| At5g02770 | + | + | + |   |
| At5g02790 | + | + | + |   |
| At5g02810 | + | + | + |   |
| At5g02820 |   |   | + |   |
| At5g02830 | + | + | + |   |
| At5g02840 | + | + | + |   |
| At5g02850 | + | + | + |   |
| At5g02860 | + |   | + |   |
| At5g02870 | + | + | + |   |
| At5g02880 | + | + | + |   |
| At5g02890 | + | + | + |   |
| At5g02910 | + | + | + |   |
| At5g02940 | + | + | + |   |
| At5g02980 | + | + |   |   |
| At5g03000 | + | + | + |   |
| At5g03030 | + | + | + |   |
| At5g03040 | + | + | + |   |
| At5g03050 | + | + | + |   |
| At5g03060 |   | + |   |   |
| At5g03070 | + | + | + |   |
| At5g03080 | + | + | + |   |
| At5g03120 | + | + | + |   |
| At5g03140 | + | + | + |   |
| At5g03160 | + | + | + |   |
| At5g03170 | + | + | + |   |
| At5g03180 | + | + |   |   |
| At5g03190 | + | + | + |   |
| At5g03220 | + | + | + |   |
| At5g03230 | + |   | + |   |
| At5g03240 | + | + | + |   |
| At5g03250 | + |   | + |   |
| At5g03260 | + | + | + |   |
| At5g03270 | + |   |   |   |
| At5g03280 | + | + | + |   |
| At5g03290 | + | + | + |   |
| At5g03300 | + | + | + |   |

|           |   |   |   |   |
|-----------|---|---|---|---|
| At5g03320 | + | + | + |   |
| At5g03340 | + | + | + |   |
| At5g03345 | + | + | + |   |
| At5g03350 |   | + |   |   |
| At5g03370 | + | + | + |   |
| At5g03380 | + | + | + |   |
| At5g03390 | + | + | + | + |
| At5g03410 | + | + | + |   |
| At5g03420 | + | + | + |   |
| At5g03430 | + | + | + |   |
| At5g03440 | + | + | + |   |
| At5g03450 | + | + |   |   |
| At5g03455 | + | + | + |   |
| At5g03460 | + | + | + |   |
| At5g03470 | + | + | + |   |
| At5g03510 | + |   | + |   |
| At5g03520 | + | + | + |   |
| At5g03530 | + | + | + |   |
| At5g03540 | + | + | + |   |
| At5g03555 | + | + | + |   |
| At5g03560 | + | + | + |   |
| At5g03570 | + |   | + |   |
| At5g03590 | + |   |   | + |
| At5g03610 | + | + | + |   |
| At5g03620 | + | + |   | + |
| At5g03630 | + | + | + |   |
| At5g03650 | + | + | + |   |
| At5g03660 | + | + | + |   |
| At5g03670 | + | + |   |   |
| At5g03690 | + | + | + |   |
| At5g03730 | + | + | + |   |
| At5g03740 | + | + | + |   |
| At5g03760 | + | + | + |   |
| At5g03790 | + | + |   | + |
| At5g03800 |   |   | + |   |
| At5g03810 | + | + | + | + |
| At5g03850 | + | + | + |   |
| At5g03870 | + | + | + |   |
| At5g03880 | + | + | + |   |
| At5g03900 | + | + | + |   |
| At5g03905 | + | + | + |   |
| At5g03910 | + | + | + |   |
| At5g03920 |   |   | + | + |
| At5g03940 | + | + | + |   |
| At5g03960 | + |   | + |   |
| At5g03970 | + | + | + |   |
| At5g04020 | + | + | + |   |
| At5g04040 | + | + | + |   |
| At5g04050 | + |   | + |   |
| At5g04060 | + | + | + |   |
| At5g04070 | + | + | + |   |
| At5g04080 | + | + | + |   |

|           |   |   |   |   |
|-----------|---|---|---|---|
| At5g04100 | + | + | + |   |
| At5g04110 | + |   | + | + |
| At5g04140 | + | + | + |   |
| At5g04160 | + | + | + |   |
| At5g04170 | + | + | + |   |
| At5g04180 | + | + | + | + |
| At5g04200 | + | + | + |   |
| At5g04220 | + |   |   |   |
| At5g04230 | + | + | + |   |
| At5g04240 | + | + | + |   |
| At5g04250 | + | + | + |   |
| At5g04260 | + | + | + |   |
| At5g04270 | + | + | + |   |
| At5g04280 | + | + | + |   |
| At5g04290 | + | + | + |   |
| At5g04320 | + | + | + |   |
| At5g04340 | + | + | + |   |
| At5g04360 | + | + | + |   |
| At5g04410 | + | + | + |   |
| At5g04420 | + | + | + |   |
| At5g04430 | + | + | + |   |
| At5g04440 | + | + | + |   |
| At5g04460 | + | + | + |   |
| At5g04470 | + | + | + |   |
| At5g04480 | + |   | + | + |
| At5g04490 | + | + | + |   |
| At5g04500 | + |   | + | + |
| At5g04510 | + | + | + |   |
| At5g04520 | + | + | + |   |
| At5g04530 | + | + | + |   |
| At5g04540 | + | + | + |   |
| At5g04550 | + | + | + |   |
| At5g04560 | + |   |   |   |
| At5g04570 | + | + | + |   |
| At5g04580 | + | + | + |   |
| At5g04590 | + | + | + |   |
| At5g04600 | + | + | + |   |
| At5g04620 | + | + | + |   |
| At5g04660 | + | + | + |   |
| At5g04670 | + | + | + |   |
| At5g04710 | + | + | + |   |
| At5g04720 | + | + | + |   |
| At5g04740 | + | + | + |   |
| At5g04750 | + | + | + |   |
| At5g04760 | + | + | + |   |
| At5g04770 | + | + | + |   |
| At5g04790 | + | + | + |   |
| At5g04800 | + | + | + |   |
| At5g04810 | + | + | + |   |
| At5g04820 | + | + | + |   |
| At5g04830 | + | + | + |   |
| At5g04840 | + | + | + |   |

|           |   |   |   |
|-----------|---|---|---|
| At5g04850 | + | + | + |
| At5g04860 | + | + | + |
| At5g04870 | + | + | + |
| At5g04890 |   |   | + |
| At5g04900 | + | + | + |
| At5g04910 | + | + | + |
| At5g04920 | + | + | + |
| At5g04930 | + | + | + |
| At5g04940 | + | + | + |
| At5g04950 | + | + | + |
| At5g04980 |   | + | + |
| At5g05000 | + | + | + |
| At5g05010 | + | + | + |
| At5g05060 | + | + | + |
| At5g05080 | + | + | + |
| At5g05090 | + | + | + |
| At5g05100 | + | + | + |
| At5g05110 | + | + | + |
| At5g05130 | + | + | + |
| At5g05140 | + | + | + |
| At5g05160 | + | + | + |
| At5g05170 | + | + | + |
| At5g05180 | + | + | + |
| At5g05190 | + | + |   |
| At5g05200 | + | + | + |
| At5g05210 | + | + | + |
| At5g05230 | + | + | + |
| At5g05270 | + | + | + |
| At5g05280 |   | + | + |
| At5g05310 | + | + | + |
| At5g05340 |   | + | + |
| At5g05350 | + | + |   |
| At5g05370 | + | + | + |
| At5g05390 |   |   | + |
| At5g05410 | + | + | + |
| At5g05440 | + | + | + |
| At5g05450 | + | + | + |
| At5g05470 | + | + | + |
| At5g05480 | + | + | + |
| At5g05520 | + | + | + |
| At5g05540 | + | + | + |
| At5g05560 | + | + | + |
| At5g05570 | + |   |   |
| At5g05600 | + | + |   |
| At5g05610 | + | + | + |
| At5g05640 | + | + | + |
| At5g05660 | + | + | + |
| At5g05670 | + | + | + |
| At5g05680 | + | + | + |
| At5g05690 | + | + | + |
| At5g05700 | + | + | + |
| At5g05710 | + | + | + |

|           |   |   |   |   |
|-----------|---|---|---|---|
| At5g05740 | + | + | + |   |
| At5g05780 | + | + | + |   |
| At5g05790 |   | + |   |   |
| At5g05800 | + | + | + |   |
| At5g05820 | + | + | + |   |
| At5g05850 | + | + | + |   |
| At5g05860 | + |   |   |   |
| At5g05920 | + | + | + |   |
| At5g05930 | + | + | + |   |
| At5g05950 | + | + | + |   |
| At5g05960 |   | + | + |   |
| At5g05980 | + | + | + |   |
| At5g05990 | + | + | + |   |
| At5g06000 | + | + | + |   |
| At5g06050 | + | + | + |   |
| At5g06060 | + | + | + |   |
| At5g06100 | + | + | + |   |
| At5g06110 | + | + | + |   |
| At5g06120 | + | + | + |   |
| At5g06130 | + | + | + |   |
| At5g06140 | + | + | + |   |
| At5g06160 | + | + | + |   |
| At5g06170 |   | + |   | + |
| At5g06180 | + | + | + |   |
| At5g06190 | + | + | + |   |
| At5g06210 | + | + | + |   |
| At5g06240 | + | + | + |   |
| At5g06250 | + |   | + |   |
| At5g06260 | + | + | + |   |
| At5g06265 | + | + |   |   |
| At5g06270 | + | + | + |   |
| At5g06280 | + | + | + |   |
| At5g06290 | + | + | + |   |
| At5g06300 | + | + | + |   |
| At5g06320 | + | + | + |   |
| At5g06330 | + |   |   |   |
| At5g06340 | + | + | + |   |
| At5g06360 | + | + | + |   |
| At5g06370 | + | + | + |   |
| At5g06410 | + | + | + |   |
| At5g06420 | + | + | + |   |
| At5g06430 | + | + | + |   |
| At5g06440 | + | + | + |   |
| At5g06460 | + | + | + |   |
| At5g06480 | + | + | + |   |
| At5g06520 | + |   |   | + |
| At5g06530 | + | + | + |   |
| At5g06550 | + | + | + |   |
| At5g06560 | + | + | + |   |
| At5g06580 | + | + | + |   |
| At5g06590 | + | + | + |   |
| At5g06600 | + | + | + |   |



|           |   |   |   |   |
|-----------|---|---|---|---|
| At5g06610 | + | + | + |   |
| At5g06630 | + |   | + |   |
| At5g06660 | + | + | + |   |
| At5g06670 | + |   | + | + |
| At5g06680 | + | + | + |   |
| At5g06690 | + |   |   |   |
| At5g06700 | + | + | + |   |
| At5g06710 |   | + | + |   |
| At5g06720 | + | + | + |   |
| At5g06750 | + | + | + |   |
| At5g06760 | + |   |   |   |
| At5g06770 | + | + | + |   |
| At5g06780 | + | + | + |   |
| At5g06820 | + |   |   |   |
| At5g06830 | + | + | + |   |
| At5g06860 | + | + | + |   |
| At5g06870 | + | + | + |   |
| At5g06910 | + | + | + |   |
| At5g06930 | + | + |   |   |
| At5g06940 | + | + | + |   |
| At5g06950 | + | + | + |   |
| At5g06960 | + | + | + |   |
| At5g06970 | + | + | + |   |
| At5g06980 | + | + | + |   |
| At5g07000 |   | + |   |   |
| At5g07010 | + | + |   |   |
| At5g07020 | + | + | + |   |
| At5g07030 | + | + | + |   |
| At5g07040 | + |   |   |   |
| At5g07080 | + | + |   |   |
| At5g07090 | + | + | + |   |
| At5g07110 | + | + | + |   |
| At5g07130 |   |   | + |   |
| At5g07180 | + | + | + | + |
| At5g07220 | + | + | + |   |
| At5g07230 | + |   |   | + |
| At5g07240 | + | + | + |   |
| At5g07250 | + | + | + |   |
| At5g07270 | + | + | + |   |
| At5g07280 | + | + | + | + |
| At5g07290 | + | + | + |   |
| At5g07300 | + | + | + |   |
| At5g07320 | + | + | + |   |
| At5g07340 | + | + | + |   |
| At5g07350 | + | + | + |   |
| At5g07360 | + | + | + |   |
| At5g07370 | + | + | + |   |
| At5g07410 | + | + | + | + |
| At5g07420 | + | + |   | + |
| At5g07430 | + | + | + | + |
| At5g07440 | + | + | + |   |
| At5g07460 | + | + | + |   |

|           |   |   |   |   |
|-----------|---|---|---|---|
| At5g07470 | + | + | + |   |
| At5g07510 | + | + |   | + |
| At5g07520 | + |   |   | + |
| At5g07530 | + | + |   |   |
| At5g07540 | + | + |   | + |
| At5g07550 | + | + |   | + |
| At5g07560 | + | + |   | + |
| At5g07580 | + | + | + |   |
| At5g07590 | + |   | + |   |
| At5g07620 | + |   | + |   |
| At5g07630 | + | + | + |   |
| At5g07660 | + |   |   |   |
| At5g07680 | + | + |   |   |
| At5g07690 |   |   | + |   |
| At5g07710 | + | + | + |   |
| At5g07720 | + |   | + |   |
| At5g07730 | + | + | + |   |
| At5g07770 | + |   |   |   |
| At5g07800 | + |   | + |   |
| At5g07810 | + | + | + |   |
| At5g07820 |   |   | + |   |
| At5g07830 | + | + | + |   |
| At5g07840 | + | + | + |   |
| At5g07850 |   |   | + | + |
| At5g07860 | + |   | + |   |
| At5g07870 | + |   | + |   |
| At5g07890 | + | + | + |   |
| At5g07900 | + | + | + |   |
| At5g07910 | + | + | + |   |
| At5g07920 | + | + | + |   |
| At5g07940 | + | + | + |   |
| At5g07950 | + | + | + |   |
| At5g07960 | + | + | + |   |
| At5g07990 | + | + | + |   |
| At5g08000 | + | + | + |   |
| At5g08010 | + | + | + |   |
| At5g08020 | + | + | + |   |
| At5g08030 | + |   |   | + |
| At5g08040 | + | + | + |   |
| At5g08050 | + | + | + |   |
| At5g08060 | + | + | + |   |
| At5g08070 | + | + | + |   |
| At5g08080 | + | + | + |   |
| At5g08100 | + | + | + |   |
| At5g08110 | + |   | + |   |
| At5g08120 | + | + | + |   |
| At5g08130 | + | + | + |   |
| At5g08140 | + | + | + |   |
| At5g08160 | + | + | + |   |
| At5g08170 | + | + | + |   |
| At5g08180 | + | + | + |   |
| At5g08190 | + | + | + |   |

|           |   |   |   |
|-----------|---|---|---|
| At5g08200 | + | + | + |
| At5g08210 | + | + | + |
| At5g08240 | + | + |   |
| At5g08250 | + |   |   |
| At5g08260 | + | + | + |
| At5g08270 | + | + | + |
| At5g08280 | + | + | + |
| At5g08290 | + | + | + |
| At5g08300 | + | + | + |
| At5g08310 |   | + |   |
| At5g08320 | + | + | + |
| At5g08330 | + | + | + |
| At5g08335 | + | + | + |
| At5g08340 | + | + | + |
| At5g08350 | + | + | + |
| At5g08370 | + | + | + |
| At5g08380 | + | + | + |
| At5g08390 | + | + | + |
| At5g08400 | + | + | + |
| At5g08410 | + | + | + |
| At5g08415 | + | + | + |
| At5g08420 | + | + | + |
| At5g08430 | + | + | + |
| At5g08440 | + | + | + |
| At5g08450 | + | + | + |
| At5g08470 | + |   |   |
| At5g08480 | + |   | + |
| At5g08500 | + | + | + |
| At5g08510 | + | + | + |
| At5g08520 | + | + | + |
| At5g08530 | + | + | + |
| At5g08535 | + | + | + |
| At5g08540 | + | + | + |
| At5g08550 | + | + | + |
| At5g08560 | + | + | + |
| At5g08565 | + | + | + |
| At5g08570 | + | + | + |
| At5g08580 | + | + | + |
| At5g08590 | + | + | + |
| At5g08610 | + | + | + |
| At5g08620 | + | + | + |
| At5g08630 | + | + | + |
| At5g08640 | + | + | + |
| At5g08650 | + | + | + |
| At5g08690 | + | + | + |
| At5g08740 | + | + | + |
| At5g08750 | + | + | + |
| At5g09220 | + | + | + |
| At5g09230 | + | + | + |
| At5g09240 | + | + | + |
| At5g09250 | + | + | + |
| At5g09270 | + | + | + |

|           |   |   |   |   |
|-----------|---|---|---|---|
| At5g09300 | + | + | + |   |
| At5g09310 | + | + | + |   |
| At5g09330 | + | + | + |   |
| At5g09370 |   | + | + | + |
| At5g09380 | + | + | + |   |
| At5g09390 | + | + | + |   |
| At5g09400 | + | + | + |   |
| At5g09410 | + | + | + |   |
| At5g09420 | + | + | + |   |
| At5g09430 | + | + |   |   |
| At5g09440 | + | + | + |   |
| At5g09450 | + | + | + |   |
| At5g09460 | + | + | + |   |
| At5g09480 | + |   |   |   |
| At5g09490 |   |   | + | + |
| At5g09500 | + | + | + | + |
| At5g09510 | + | + | + |   |
| At5g09520 | + | + | + |   |
| At5g09530 |   | + | + |   |
| At5g09550 | + | + | + |   |
| At5g09570 | + | + | + |   |
| At5g09590 | + | + | + |   |
| At5g09620 | + | + | + |   |
| At5g09630 | + |   | + |   |
| At5g09650 | + | + | + |   |
| At5g09660 | + | + | + |   |
| At5g09670 | + | + | + |   |
| At5g09690 | + | + | + |   |
| At5g09730 | + | + | + | + |
| At5g09740 | + | + | + |   |
| At5g09760 | + | + | + |   |
| At5g09770 | + | + | + |   |
| At5g09790 | + |   |   | + |
| At5g09810 | + | + | + |   |
| At5g09820 | + | + | + |   |
| At5g09830 | + | + | + |   |
| At5g09840 | + |   |   | + |
| At5g09850 | + | + | + |   |
| At5g09860 | + | + | + |   |
| At5g09870 | + | + | + |   |
| At5g09880 | + | + | + |   |
| At5g09890 | + | + | + |   |
| At5g09900 | + | + | + |   |
| At5g09920 | + | + | + |   |
| At5g09960 | + | + | + |   |
| At5g09980 | + | + | + |   |
| At5g09990 | + | + | + |   |
| At5g09995 | + | + | + |   |
| At5g10010 | + | + | + |   |
| At5g10020 | + | + | + |   |
| At5g10030 | + | + |   |   |
| At5g10070 | + | + | + |   |

|           |   |   |   |   |
|-----------|---|---|---|---|
| At5g10100 |   |   | + | + |
| At5g10140 | + |   |   |   |
| At5g10160 | + | + | + |   |
| At5g10170 |   |   | + |   |
| At5g10180 | + | + | + |   |
| At5g10190 | + |   | + |   |
| At5g10220 |   |   | + | + |
| At5g10230 |   |   | + |   |
| At5g10240 | + | + | + |   |
| At5g10260 | + | + | + |   |
| At5g10270 | + | + | + |   |
| At5g10290 | + | + | + |   |
| At5g10300 | + | + | + |   |
| At5g10310 | + | + | + |   |
| At5g10320 | + | + | + |   |
| At5g10350 | + | + | + |   |
| At5g10360 | + | + | + |   |
| At5g10370 | + | + | + |   |
| At5g10380 | + | + | + |   |
| At5g10390 | + | + | + |   |
| At5g10400 | + | + | + |   |
| At5g10430 | + | + | + |   |
| At5g10450 | + | + | + |   |
| At5g10460 | + | + | + |   |
| At5g10470 | + | + | + |   |
| At5g10480 | + | + | + |   |
| At5g10490 | + | + | + |   |
| At5g10510 | + | + | + |   |
| At5g10540 | + | + | + |   |
| At5g10550 | + | + | + |   |
| At5g10560 | + | + | + |   |
| At5g10610 |   | + |   |   |
| At5g10630 | + | + | + |   |
| At5g10650 | + | + | + |   |
| At5g10660 | + |   | + |   |
| At5g10690 | + | + | + |   |
| At5g10695 | + | + | + |   |
| At5g10700 | + | + | + |   |
| At5g10710 | + | + | + |   |
| At5g10730 | + | + | + |   |
| At5g10740 | + | + | + |   |
| At5g10750 | + | + | + |   |
| At5g10760 |   | + |   |   |
| At5g10770 |   | + | + |   |
| At5g10780 | + | + | + |   |
| At5g10790 | + | + | + |   |
| At5g10800 |   | + |   | + |
| At5g10810 | + | + | + |   |
| At5g10820 | + | + | + |   |
| At5g10830 | + |   | + |   |
| At5g10840 | + | + | + |   |
| At5g10860 | + | + | + |   |

|           |   |   |   |   |
|-----------|---|---|---|---|
| At5g10870 | + | + | + |   |
| At5g10900 | + | + | + |   |
| At5g10910 | + | + | + |   |
| At5g10920 | + | + | + |   |
| At5g10930 | + | + | + |   |
| At5g10940 | + | + | + |   |
| At5g10950 | + | + | + |   |
| At5g10960 | + | + | + |   |
| At5g10980 | + | + | + |   |
| At5g11000 | + | + | + |   |
| At5g11010 | + | + | + |   |
| At5g11015 | + | + | + |   |
| At5g11030 | + | + | + |   |
| At5g11040 | + | + | + |   |
| At5g11060 | + | + | + |   |
| At5g11070 | + | + | + |   |
| At5g11090 | + | + | + |   |
| At5g11100 | + |   |   |   |
| At5g11110 | + | + | + |   |
| At5g11120 | + |   |   |   |
| At5g11150 | + | + | + |   |
| At5g11160 | + | + | + |   |
| At5g11200 | + | + | + |   |
| At5g11230 | + | + | + |   |
| At5g11240 | + | + | + |   |
| At5g11250 |   | + | + |   |
| At5g11260 | + | + | + |   |
| At5g11270 | + | + | + |   |
| At5g11280 | + | + | + |   |
| At5g11300 | + |   | + |   |
| At5g11340 | + | + | + |   |
| At5g11350 | + |   |   | + |
| At5g11360 |   | + | + | + |
| At5g11380 | + | + | + |   |
| At5g11390 | + | + | + |   |
| At5g11410 | + |   | + |   |
| At5g11420 | + | + | + |   |
| At5g11430 | + | + | + |   |
| At5g11450 | + | + | + |   |
| At5g11460 | + | + | + |   |
| At5g11470 | + |   |   |   |
| At5g11480 | + | + | + |   |
| At5g11490 | + | + | + |   |
| At5g11500 | + | + | + |   |
| At5g11510 | + | + | + | + |
| At5g11520 | + | + | + |   |
| At5g11530 | + |   |   |   |
| At5g11540 | + | + | + |   |
| At5g11550 | + | + | + |   |
| At5g11560 | + | + | + |   |
| At5g11580 | + | + | + |   |
| At5g11600 | + | + | + |   |

|           |   |   |   |   |
|-----------|---|---|---|---|
| At5g11630 | + | + | + |   |
| At5g11640 | + | + | + |   |
| At5g11650 | + | + | + |   |
| At5g11670 | + | + | + |   |
| At5g11680 | + | + | + |   |
| At5g11690 | + | + | + |   |
| At5g11700 | + | + | + |   |
| At5g11710 | + | + | + |   |
| At5g11720 | + | + | + |   |
| At5g11730 | + | + | + |   |
| At5g11740 | + | + | + |   |
| At5g11760 | + | + | + |   |
| At5g11770 | + | + | + |   |
| At5g11780 |   | + | + |   |
| At5g11790 | + | + | + |   |
| At5g11800 | + | + | + |   |
| At5g11810 | + | + | + |   |
| At5g11840 | + | + | + |   |
| At5g11850 | + | + | + |   |
| At5g11860 | + | + | + |   |
| At5g11890 |   | + | + |   |
| At5g11900 | + | + | + |   |
| At5g11910 | + | + | + |   |
| At5g11920 |   | + |   |   |
| At5g11950 | + | + | + |   |
| At5g11960 | + | + | + |   |
| At5g11970 | + | + | + |   |
| At5g11980 | + | + | + |   |
| At5g12000 | + | + | + | + |
| At5g12010 | + | + | + |   |
| At5g12020 |   |   | + |   |
| At5g12030 |   |   | + |   |
| At5g12040 | + | + | + |   |
| At5g12050 | + | + | + |   |
| At5g12060 |   |   | + | + |
| At5g12080 | + | + | + |   |
| At5g12100 | + | + | + |   |
| At5g12110 | + | + | + |   |
| At5g12120 | + | + | + |   |
| At5g12130 | + | + | + |   |
| At5g12140 | + | + | + |   |
| At5g12150 | + | + | + |   |
| At5g12170 | + | + | + |   |
| At5g12180 | + | + | + | + |
| At5g12190 | + | + | + |   |
| At5g12200 | + | + | + |   |
| At5g12210 | + | + | + |   |
| At5g12220 | + | + | + |   |
| At5g12230 | + | + | + |   |
| At5g12250 | + | + | + |   |
| At5g12260 | + | + | + |   |
| At5g12290 | + | + | + |   |

|           |   |   |   |   |
|-----------|---|---|---|---|
| At5g12310 | + | + | + |   |
| At5g12330 | + | + | + |   |
| At5g12350 | + | + | + |   |
| At5g12370 | + | + | + |   |
| At5g12380 |   | + |   |   |
| At5g12390 | + | + | + |   |
| At5g12400 | + | + | + |   |
| At5g12410 | + | + | + |   |
| At5g12430 | + | + | + |   |
| At5g12440 | + | + | + |   |
| At5g12470 | + | + | + |   |
| At5g12480 | + | + | + |   |
| At5g12840 | + | + | + |   |
| At5g12850 | + | + | + |   |
| At5g12860 | + | + | + |   |
| At5g12880 | + |   |   |   |
| At5g12890 | + | + | + |   |
| At5g12900 | + | + | + |   |
| At5g12930 | + | + | + | + |
| At5g12940 | + | + | + |   |
| At5g12950 | + | + | + |   |
| At5g12970 | + | + | + |   |
| At5g12980 | + | + | + |   |
| At5g12990 |   | + |   |   |
| At5g13000 | + | + | + |   |
| At5g13010 | + | + | + |   |
| At5g13020 | + | + | + |   |
| At5g13030 | + | + | + |   |
| At5g13040 | + | + | + |   |
| At5g13050 | + | + | + |   |
| At5g13070 | + | + | + |   |
| At5g13090 | + | + | + |   |
| At5g13100 | + | + | + |   |
| At5g13110 | + | + | + |   |
| At5g13120 | + | + | + |   |
| At5g13140 | + | + | + |   |
| At5g13150 | + | + |   |   |
| At5g13160 | + | + | + |   |
| At5g13170 | + | + | + | + |
| At5g13180 | + | + | + |   |
| At5g13190 | + | + | + |   |
| At5g13200 |   | + | + |   |
| At5g13220 | + | + | + |   |
| At5g13240 | + | + | + |   |
| At5g13260 | + | + | + |   |
| At5g13280 | + | + | + |   |
| At5g13290 | + | + | + |   |
| At5g13300 | + | + | + |   |
| At5g13310 | + | + | + |   |
| At5g13320 | + | + | + | + |
| At5g13330 |   | + | + |   |
| At5g13350 | + |   |   | + |



|           |   |   |   |   |
|-----------|---|---|---|---|
| At5g13360 | + |   | + |   |
| At5g13380 | + |   |   | + |
| At5g13390 | + | + | + |   |
| At5g13400 | + | + | + |   |
| At5g13410 | + | + | + |   |
| At5g13420 | + | + | + |   |
| At5g13430 | + | + | + |   |
| At5g13450 | + | + | + |   |
| At5g13460 | + | + | + |   |
| At5g13470 | + | + | + |   |
| At5g13480 | + | + | + |   |
| At5g13490 | + | + | + |   |
| At5g13500 | + | + | + |   |
| At5g13510 | + | + | + |   |
| At5g13520 | + | + | + |   |
| At5g13530 | + |   |   |   |
| At5g13540 | + | + | + |   |
| At5g13550 | + | + | + |   |
| At5g13560 | + | + | + |   |
| At5g13570 | + | + | + |   |
| At5g13580 | + | + |   |   |
| At5g13590 | + | + | + |   |
| At5g13600 | + |   |   |   |
| At5g13610 | + | + | + |   |
| At5g13630 | + | + | + |   |
| At5g13640 | + | + | + |   |
| At5g13650 | + | + | + |   |
| At5g13670 | + |   | + | + |
| At5g13680 |   | + |   |   |
| At5g13690 | + | + | + |   |
| At5g13700 | + |   |   |   |
| At5g13710 | + | + | + |   |
| At5g13720 | + | + | + |   |
| At5g13730 | + | + | + |   |
| At5g13740 | + | + | + |   |
| At5g13750 | + | + | + |   |
| At5g13760 | + | + | + |   |
| At5g13770 | + | + | + |   |
| At5g13780 | + | + | + |   |
| At5g13790 | + |   |   | + |
| At5g13800 | + | + | + |   |
| At5g13810 | + | + | + |   |
| At5g13820 | + | + |   |   |
| At5g13840 | + | + | + |   |
| At5g13850 | + | + | + |   |
| At5g13880 | + |   | + |   |
| At5g13890 | + | + | + |   |
| At5g13910 |   | + |   |   |
| At5g13930 | + | + | + |   |
| At5g13950 | + | + | + |   |
| At5g13960 | + | + | + |   |
| At5g13970 | + | + | + |   |

|           |   |   |   |   |
|-----------|---|---|---|---|
| At5g13980 | + | + | + |   |
| At5g13990 | + | + |   |   |
| At5g14000 | + | + |   |   |
| At5g14030 | + | + | + |   |
| At5g14040 | + | + | + |   |
| At5g14050 | + | + | + |   |
| At5g14080 | + |   |   |   |
| At5g14100 | + | + | + |   |
| At5g14105 | + | + | + |   |
| At5g14120 | + | + | + |   |
| At5g14130 |   |   | + |   |
| At5g14170 | + | + | + |   |
| At5g14180 | + |   |   |   |
| At5g14190 | + |   |   | + |
| At5g14210 | + | + | + |   |
| At5g14220 | + | + | + |   |
| At5g14230 | + |   |   |   |
| At5g14240 | + | + | + |   |
| At5g14250 | + | + | + |   |
| At5g14260 | + | + | + |   |
| At5g14270 | + | + | + |   |
| At5g14310 | + | + | + |   |
| At5g14320 | + | + | + |   |
| At5g14370 | + | + | + |   |
| At5g14380 | + | + | + |   |
| At5g14390 | + |   |   |   |
| At5g14410 | + | + | + |   |
| At5g14420 | + | + | + |   |
| At5g14430 | + | + | + |   |
| At5g14440 | + | + | + |   |
| At5g14450 | + | + | + |   |
| At5g14460 | + | + | + |   |
| At5g14500 | + | + | + |   |
| At5g14510 | + |   | + |   |
| At5g14520 | + | + | + |   |
| At5g14530 | + | + | + |   |
| At5g14540 | + | + | + |   |
| At5g14550 | + | + | + |   |
| At5g14570 | + | + | + |   |
| At5g14580 | + | + | + |   |
| At5g14590 | + | + | + |   |
| At5g14600 | + | + | + |   |
| At5g14610 | + | + | + |   |
| At5g14620 | + | + | + |   |
| At5g14630 | + | + | + |   |
| At5g14640 | + | + | + |   |
| At5g14660 | + | + | + |   |
| At5g14670 | + | + | + |   |
| At5g14680 | + | + | + |   |
| At5g14700 | + | + | + |   |
| At5g14710 | + | + | + |   |
| At5g14720 | + | + | + |   |

|           |   |   |   |   |
|-----------|---|---|---|---|
| At5g14740 | + | + | + |   |
| At5g14760 | + | + | + |   |
| At5g14770 | + |   |   | + |
| At5g14780 | + | + | + |   |
| At5g14790 | + | + | + |   |
| At5g14800 | + | + | + |   |
| At5g14850 | + | + | + |   |
| At5g14870 | + | + |   |   |
| At5g14880 | + | + | + |   |
| At5g14890 | + | + | + | + |
| At5g14910 | + | + | + |   |
| At5g14920 | + | + | + |   |
| At5g14930 | + | + | + |   |
| At5g14940 | + | + | + |   |
| At5g14950 | + | + | + |   |
| At5g14960 | + |   | + |   |
| At5g14970 | + | + | + |   |
| At5g14980 | + |   |   | + |
| At5g15020 | + | + | + |   |
| At5g15050 | + | + | + |   |
| At5g15070 | + |   |   | + |
| At5g15080 | + | + | + |   |
| At5g15090 | + | + | + |   |
| At5g15100 | + | + | + | + |
| At5g15110 | + | + | + | + |
| At5g15120 | + | + | + |   |
| At5g15140 | + | + | + | + |
| At5g15150 | + |   |   |   |
| At5g15160 | + | + | + |   |
| At5g15170 | + | + | + |   |
| At5g15190 | + |   |   |   |
| At5g15200 | + | + | + |   |
| At5g15210 | + | + | + |   |
| At5g15230 | + | + | + |   |
| At5g15240 | + |   | + |   |
| At5g15270 | + | + | + |   |
| At5g15280 | + |   | + |   |
| At5g15300 | + |   |   |   |
| At5g15310 | + | + | + |   |
| At5g15320 | + | + | + |   |
| At5g15330 | + | + | + |   |
| At5g15350 | + | + | + |   |
| At5g15360 | + | + | + |   |
| At5g15390 | + | + | + |   |
| At5g15400 | + | + | + |   |
| At5g15410 | + | + | + |   |
| At5g15440 | + | + | + |   |
| At5g15450 | + | + | + |   |
| At5g15460 | + | + | + |   |
| At5g15470 | + | + | + |   |
| At5g15490 | + | + | + |   |
| At5g15510 | + | + | + |   |

|           |   |   |   |   |
|-----------|---|---|---|---|
| At5g15520 | + | + | + |   |
| At5g15530 | + | + | + |   |
| At5g15540 | + | + | + |   |
| At5g15550 | + | + | + |   |
| At5g15570 | + | + | + |   |
| At5g15580 | + | + | + |   |
| At5g15600 | + | + | + |   |
| At5g15610 | + | + | + |   |
| At5g15630 | + | + | + |   |
| At5g15640 | + | + | + |   |
| At5g15680 | + | + | + |   |
| At5g15710 | + | + | + |   |
| At5g15720 | + |   |   | + |
| At5g15730 | + | + | + |   |
| At5g15740 | + | + | + |   |
| At5g15750 | + | + | + |   |
| At5g15760 |   | + | + |   |
| At5g15770 | + | + | + |   |
| At5g15780 | + | + | + |   |
| At5g15790 | + | + | + |   |
| At5g15800 | + | + | + | + |
| At5g15810 | + | + | + |   |
| At5g15850 | + | + | + |   |
| At5g15860 | + | + | + |   |
| At5g15870 | + | + | + |   |
| At5g15880 | + | + | + |   |
| At5g15910 | + | + | + |   |
| At5g15920 | + | + | + |   |
| At5g15930 | + | + | + |   |
| At5g15950 | + | + | + |   |
| At5g15960 | + | + | + |   |
| At5g15980 | + | + | + |   |
| At5g16000 | + | + | + |   |
| At5g16010 | + | + | + |   |
| At5g16030 | + | + | + |   |
| At5g16040 | + | + | + |   |
| At5g16050 | + | + | + |   |
| At5g16060 | + | + | + |   |
| At5g16070 | + | + | + |   |
| At5g16100 | + | + | + |   |
| At5g16110 | + | + | + |   |
| At5g16120 | + | + | + |   |
| At5g16130 | + | + | + |   |
| At5g16140 | + | + | + |   |
| At5g16150 | + | + | + |   |
| At5g16180 | + | + | + |   |
| At5g16190 | + | + | + | + |
| At5g16200 | + |   | + |   |
| At5g16210 | + | + | + |   |
| At5g16220 | + | + | + |   |
| At5g16240 | + | + | + |   |
| At5g16250 | + | + | + |   |

|           |   |   |   |   |
|-----------|---|---|---|---|
| At5g16260 | + | + | + |   |
| At5g16270 | + | + | + |   |
| At5g16280 | + | + | + |   |
| At5g16290 | + | + | + |   |
| At5g16300 | + | + | + |   |
| At5g16310 | + | + | + |   |
| At5g16320 |   | + |   |   |
| At5g16340 | + | + | + |   |
| At5g16380 | + | + | + |   |
| At5g16390 | + | + | + |   |
| At5g16400 | + | + | + |   |
| At5g16420 | + |   |   |   |
| At5g16440 | + | + | + |   |
| At5g16450 | + | + | + |   |
| At5g16470 | + | + | + |   |
| At5g16480 | + | + |   |   |
| At5g16490 | + | + | + |   |
| At5g16500 | + | + |   | + |
| At5g16505 | + | + | + |   |
| At5g16510 | + | + | + |   |
| At5g16520 | + | + | + |   |
| At5g16530 | + | + | + |   |
| At5g16540 | + | + | + |   |
| At5g16550 | + | + | + |   |
| At5g16570 | + |   | + |   |
| At5g16590 | + | + | + |   |
| At5g16600 | + |   | + |   |
| At5g16610 | + | + | + |   |
| At5g16620 | + | + | + |   |
| At5g16630 | + | + | + |   |
| At5g16650 | + | + | + |   |
| At5g16660 | + | + | + |   |
| At5g16680 | + | + | + |   |
| At5g16690 |   |   | + | + |
| At5g16710 | + | + | + |   |
| At5g16715 | + | + | + |   |
| At5g16720 | + | + | + |   |
| At5g16730 | + | + | + |   |
| At5g16750 | + | + | + |   |
| At5g16760 | + | + | + |   |
| At5g16780 | + | + | + |   |
| At5g16800 | + | + | + |   |
| At5g16810 | + | + | + |   |
| At5g16830 | + | + | + |   |
| At5g16840 | + | + | + |   |
| At5g16870 | + | + | + |   |
| At5g16880 | + | + | + |   |
| At5g16910 | + | + | + |   |
| At5g16920 | + |   |   | + |
| At5g16930 | + | + | + |   |
| At5g16940 | + | + | + |   |
| At5g16950 | + | + | + |   |

|           |   |   |   |   |
|-----------|---|---|---|---|
| At5g16960 | + |   |   | + |
| At5g16970 |   | + | + |   |
| At5g16990 | + | + | + |   |
| At5g17010 | + | + | + |   |
| At5g17020 | + | + | + |   |
| At5g17050 | + | + | + |   |
| At5g17060 | + | + | + |   |
| At5g17070 | + | + | + |   |
| At5g17100 | + | + | + |   |
| At5g17160 | + | + | + |   |
| At5g17170 | + | + | + |   |
| At5g17190 | + | + | + |   |
| At5g17210 | + | + | + |   |
| At5g17220 | + | + | + |   |
| At5g17230 | + | + | + |   |
| At5g17240 | + | + | + |   |
| At5g17250 | + | + | + |   |
| At5g17270 | + | + | + |   |
| At5g17280 | + | + | + |   |
| At5g17290 | + | + | + |   |
| At5g17300 | + | + | + |   |
| At5g17310 | + | + | + |   |
| At5g17320 |   |   | + |   |
| At5g17330 |   |   | + |   |
| At5g17340 | + |   |   |   |
| At5g17350 | + |   |   |   |
| At5g17370 |   |   | + |   |
| At5g17380 | + | + | + |   |
| At5g17400 | + | + | + |   |
| At5g17410 | + | + | + |   |
| At5g17420 | + | + | + |   |
| At5g17440 | + | + | + |   |
| At5g17450 |   | + |   |   |
| At5g17470 | + |   | + | + |
| At5g17480 | + | + |   | + |
| At5g17510 | + | + | + |   |
| At5g17520 | + | + | + |   |
| At5g17530 | + | + | + |   |
| At5g17560 | + | + | + |   |
| At5g17570 | + | + | + |   |
| At5g17600 | + | + | + |   |
| At5g17610 | + | + | + |   |
| At5g17620 | + | + | + |   |
| At5g17630 | + | + | + |   |
| At5g17640 | + | + | + |   |
| At5g17650 | + | + | + |   |
| At5g17660 | + | + | + |   |
| At5g17670 | + | + | + |   |
| At5g17680 |   | + |   |   |
| At5g17690 | + | + | + |   |
| At5g17700 | + | + | + |   |
| At5g17710 | + | + | + |   |

|           |   |   |   |   |
|-----------|---|---|---|---|
| At5g17760 | + | + | + |   |
| At5g17770 | + | + | + |   |
| At5g17780 |   |   | + |   |
| At5g17790 | + | + | + |   |
| At5g17800 | + |   |   |   |
| At5g17840 | + | + | + |   |
| At5g17850 |   | + |   |   |
| At5g17860 | + | + | + |   |
| At5g17870 | + | + | + |   |
| At5g17900 | + | + | + |   |
| At5g17910 | + | + | + |   |
| At5g17930 | + | + | + |   |
| At5g17980 | + | + | + |   |
| At5g17990 | + | + | + |   |
| At5g18000 | + | + | + | + |
| At5g18040 | + | + | + |   |
| At5g18060 | + | + | + |   |
| At5g18070 | + | + | + |   |
| At5g18090 | + | + | + |   |
| At5g18100 | + | + | + |   |
| At5g18110 | + | + | + |   |
| At5g18120 | + | + | + |   |
| At5g18130 | + | + | + |   |
| At5g18140 | + | + | + |   |
| At5g18150 | + | + | + |   |
| At5g18170 | + | + | + |   |
| At5g18180 | + |   |   |   |
| At5g18190 | + | + | + |   |
| At5g18200 | + | + | + |   |
| At5g18210 | + | + | + |   |
| At5g18230 | + | + | + |   |
| At5g18240 | + | + | + |   |
| At5g18250 | + | + | + |   |
| At5g18270 |   | + | + |   |
| At5g18280 | + | + | + |   |
| At5g18310 | + | + | + |   |
| At5g18340 | + |   |   | + |
| At5g18390 | + | + | + |   |
| At5g18400 | + | + | + |   |
| At5g18410 | + | + | + |   |
| At5g18420 | + | + | + |   |
| At5g18430 |   |   | + |   |
| At5g18440 | + | + | + |   |
| At5g18460 | + | + | + |   |
| At5g18470 | + | + | + |   |
| At5g18470 |   | + | + |   |
| At5g18490 | + | + |   |   |
| At5g18500 | + | + | + |   |
| At5g18520 | + | + | + |   |
| At5g18530 | + | + | + |   |
| At5g18540 |   |   | + |   |
| At5g18550 | + | + | + |   |

|           |   |   |   |   |
|-----------|---|---|---|---|
| At5g18560 | + |   |   |   |
| At5g18570 | + | + | + |   |
| At5g18580 | + | + | + |   |
| At5g18590 | + | + | + |   |
| At5g18600 | + | + | + |   |
| At5g18620 | + | + | + |   |
| At5g18630 | + | + | + |   |
| At5g18640 | + | + | + |   |
| At5g18650 | + | + | + |   |
| At5g18660 | + | + | + |   |
| At5g18670 | + | + | + |   |
| At5g18680 | + | + | + |   |
| At5g18690 | + | + | + |   |
| At5g18750 | + | + | + | + |
| At5g18760 | + | + | + |   |
| At5g18770 | + | + | + |   |
| At5g18780 | + | + | + |   |
| At5g18790 | + | + | + |   |
| At5g18800 | + | + | + |   |
| At5g18820 | + | + | + |   |
| At5g18830 | + | + | + |   |
| At5g18840 | + | + | + |   |
| At5g18850 | + | + | + |   |
| At5g18860 | + | + | + |   |
| At5g18900 | + | + | + |   |
| At5g18910 | + | + | + |   |
| At5g18920 |   | + | + |   |
| At5g18930 | + | + | + |   |
| At5g18940 | + | + | + |   |
| At5g18950 |   | + | + |   |
| At5g18960 | + | + | + |   |
| At5g18970 | + | + | + |   |
| At5g19000 | + | + | + |   |
| At5g19010 | + | + | + |   |
| At5g19020 |   |   | + |   |
| At5g19030 | + | + | + |   |
| At5g19050 | + | + | + |   |
| At5g19070 | + | + | + |   |
| At5g19090 | + | + | + |   |
| At5g19120 | + | + | + |   |
| At5g19130 | + | + | + |   |
| At5g19140 | + | + | + |   |
| At5g19150 | + | + | + |   |
| At5g19170 | + | + | + |   |
| At5g19180 | + | + | + |   |
| At5g19210 | + | + | + |   |
| At5g19220 | + | + | + |   |
| At5g19240 | + | + | + |   |
| At5g19250 | + | + | + |   |
| At5g19280 | + | + | + |   |
| At5g19290 | + | + | + |   |
| At5g19300 | + | + | + |   |



|           |   |   |   |   |
|-----------|---|---|---|---|
| At5g19310 | + | + | + |   |
| At5g19320 | + | + | + |   |
| At5g19330 | + | + | + |   |
| At5g19340 | + | + | + |   |
| At5g19350 | + | + | + |   |
| At5g19360 | + | + | + | + |
| At5g19370 | + | + | + |   |
| At5g19380 | + | + | + |   |
| At5g19400 | + | + | + |   |
| At5g19420 | + | + | + |   |
| At5g19430 | + | + | + |   |
| At5g19440 | + | + | + |   |
| At5g19450 | + | + | + |   |
| At5g19470 | + | + | + |   |
| At5g19480 | + | + | + |   |
| At5g19500 | + | + | + |   |
| At5g19510 | + | + | + |   |
| At5g19530 | + | + | + |   |
| At5g19540 | + | + | + |   |
| At5g19550 | + | + | + |   |
| At5g19570 | + | + | + |   |
| At5g19580 | + | + | + | + |
| At5g19590 | + | + | + |   |
| At5g19600 | + | + |   |   |
| At5g19610 | + |   |   | + |
| At5g19620 | + | + | + |   |
| At5g19630 | + | + | + |   |
| At5g19640 | + |   |   | + |
| At5g19660 | + | + | + |   |
| At5g19680 | + | + | + |   |
| At5g19690 | + | + | + |   |
| At5g19730 | + | + | + |   |
| At5g19750 | + | + | + |   |
| At5g19760 | + | + | + |   |
| At5g19770 | + | + | + |   |
| At5g19820 | + | + | + |   |
| At5g19830 | + | + |   |   |
| At5g19840 | + | + | + |   |
| At5g19850 | + | + | + |   |
| At5g19855 | + | + | + |   |
| At5g19860 | + | + | + |   |
| At5g19870 | + |   |   |   |
| At5g19875 | + | + | + |   |
| At5g19880 |   | + |   | + |
| At5g19890 |   | + | + |   |
| At5g19900 | + | + | + |   |
| At5g19910 | + | + | + |   |
| At5g19930 | + | + | + |   |
| At5g19940 | + | + | + |   |
| At5g19950 | + |   | + |   |
| At5g19960 | + | + | + |   |
| At5g19980 | + | + | + |   |

|           |   |   |   |   |
|-----------|---|---|---|---|
| At5g20000 | + | + | + |   |
| At5g20010 | + | + | + |   |
| At5g20030 | + |   |   |   |
| At5g20040 | + | + | + |   |
| At5g20050 | + | + | + |   |
| At5g20060 | + | + | + |   |
| At5g20070 | + | + | + |   |
| At5g20080 | + | + | + |   |
| At5g20090 | + | + | + |   |
| At5g20110 | + | + |   |   |
| At5g20120 | + | + | + |   |
| At5g20130 | + | + | + |   |
| At5g20140 | + | + | + |   |
| At5g20150 | + | + | + |   |
| At5g20160 | + | + | + |   |
| At5g20170 | + | + | + |   |
| At5g20180 | + | + | + |   |
| At5g20200 | + | + | + |   |
| At5g20220 | + | + | + |   |
| At5g20230 | + | + | + |   |
| At5g20240 | + | + | + |   |
| At5g20250 | + | + | + |   |
| At5g20270 | + | + | + |   |
| At5g20280 | + | + | + |   |
| At5g20290 | + | + | + |   |
| At5g20300 | + | + | + |   |
| At5g20320 | + | + | + |   |
| At5g20330 | + | + |   | + |
| At5g20350 | + | + | + |   |
| At5g20360 | + | + | + |   |
| At5g20380 | + | + | + |   |
| At5g20390 |   | + | + | + |
| At5g20410 | + | + | + |   |
| At5g20440 |   |   | + |   |
| At5g20460 | + | + |   |   |
| At5g20470 | + | + | + |   |
| At5g20480 | + | + |   |   |
| At5g20500 | + | + | + |   |
| At5g20510 | + | + | + |   |
| At5g20520 | + | + | + |   |
| At5g20530 |   |   | + |   |
| At5g20540 | + | + | + |   |
| At5g20570 | + | + | + |   |
| At5g20580 | + | + | + |   |
| At5g20590 | + | + | + |   |
| At5g20600 | + | + | + |   |
| At5g20610 | + | + | + |   |
| At5g20620 | + | + | + |   |
| At5g20630 | + | + | + |   |
| At5g20650 | + | + | + |   |
| At5g20660 | + | + | + |   |
| At5g20680 | + | + | + |   |

|           |   |   |   |   |
|-----------|---|---|---|---|
| At5g20690 | + | + | + |   |
| At5g20700 | + | + | + |   |
| At5g20710 | + | + | + | + |
| At5g20720 | + | + | + |   |
| At5g20730 | + | + | + |   |
| At5g20740 | + | + | + | + |
| At5g20790 | + |   |   |   |
| At5g20810 | + | + |   | + |
| At5g20820 |   | + |   |   |
| At5g20830 | + | + | + |   |
| At5g20840 | + | + | + |   |
| At5g20870 | + | + | + |   |
| At5g20880 | + | + | + |   |
| At5g20885 | + | + | + |   |
| At5g20890 | + | + | + |   |
| At5g20900 | + | + | + |   |
| At5g20910 | + | + | + |   |
| At5g20920 | + | + | + |   |
| At5g20930 | + | + | + |   |
| At5g20935 | + | + | + |   |
| At5g20940 | + |   |   | + |
| At5g20950 | + | + | + |   |
| At5g20960 |   | + |   |   |
| At5g20980 | + | + | + |   |
| At5g20990 | + | + | + |   |
| At5g21010 | + | + | + |   |
| At5g21040 | + | + | + |   |
| At5g21050 | + |   |   |   |
| At5g21060 | + | + | + |   |
| At5g21070 | + | + | + |   |
| At5g21090 | + | + | + |   |
| At5g21100 | + | + | + |   |
| At5g21105 | + | + | + |   |
| At5g21150 | + | + | + | + |
| At5g21160 | + | + | + |   |
| At5g21170 | + | + | + |   |
| At5g22000 | + | + | + |   |
| At5g22030 | + | + | + |   |
| At5g22060 | + | + | + |   |
| At5g22220 | + | + | + |   |
| At5g22250 | + | + | + |   |
| At5g22270 | + | + | + |   |
| At5g22280 | + | + | + |   |
| At5g22290 | + | + | + |   |
| At5g22300 | + | + | + |   |
| At5g22310 |   | + |   |   |
| At5g22320 | + | + | + |   |
| At5g22330 | + | + | + |   |
| At5g22340 | + | + | + |   |
| At5g22360 | + | + | + |   |
| At5g22370 | + | + | + |   |
| At5g22390 | + |   |   |   |

|           |   |   |   |   |
|-----------|---|---|---|---|
| At5g22400 | + | + | + |   |
| At5g22420 | + | + |   |   |
| At5g22430 | + | + | + | + |
| At5g22440 | + | + | + |   |
| At5g22450 | + | + | + |   |
| At5g22460 | + | + | + |   |
| At5g22480 | + | + | + |   |
| At5g22500 | + | + | + |   |
| At5g22510 | + | + | + |   |
| At5g22540 | + |   |   |   |
| At5g22570 |   | + |   |   |
| At5g22580 | + | + | + |   |
| At5g22620 | + | + | + |   |
| At5g22630 | + | + | + |   |
| At5g22640 | + | + | + |   |
| At5g22650 | + | + | + |   |
| At5g22690 | + | + |   |   |
| At5g22700 | + | + | + |   |
| At5g22710 | + | + | + |   |
| At5g22730 | + | + | + |   |
| At5g22740 | + | + | + |   |
| At5g22760 | + | + | + |   |
| At5g22770 | + | + | + |   |
| At5g22790 | + | + | + |   |
| At5g22820 | + | + | + |   |
| At5g22830 | + | + | + |   |
| At5g22840 | + | + | + |   |
| At5g22850 | + | + | + |   |
| At5g22860 | + | + |   |   |
| At5g22870 | + | + | + |   |
| At5g22875 | + | + | + |   |
| At5g22880 | + | + | + |   |
| At5g22920 | + | + | + |   |
| At5g22940 | + | + | + |   |
| At5g22950 | + | + | + |   |
| At5g22970 |   | + | + |   |
| At5g22980 |   |   | + | + |
| At5g23010 | + |   |   |   |
| At5g23020 | + |   |   |   |
| At5g23050 | + | + | + |   |
| At5g23060 | + | + | + |   |
| At5g23070 | + | + | + |   |
| At5g23080 | + | + | + |   |
| At5g23090 | + | + | + |   |
| At5g23110 | + | + | + |   |
| At5g23120 | + | + | + |   |
| At5g23130 | + | + | + |   |
| At5g23140 | + | + | + |   |
| At5g23150 | + | + | + |   |
| At5g23170 | + | + | + |   |
| At5g23180 | + |   |   |   |
| At5g23210 | + | + | + |   |

|           |   |   |   |   |
|-----------|---|---|---|---|
| At5g23250 | + | + | + |   |
| At5g23260 | + | + | + |   |
| At5g23270 | + | + | + |   |
| At5g23290 | + | + | + |   |
| At5g23300 | + | + | + |   |
| At5g23310 | + | + | + |   |
| At5g23330 | + | + | + |   |
| At5g23340 | + | + | + |   |
| At5g23350 | + | + | + |   |
| At5g23380 | + |   |   |   |
| At5g23390 | + | + | + |   |
| At5g23400 | + | + | + |   |
| At5g23405 | + | + | + |   |
| At5g23420 | + | + | + |   |
| At5g23430 | + | + | + |   |
| At5g23440 | + | + | + |   |
| At5g23450 | + | + | + |   |
| At5g23460 | + |   |   |   |
| At5g23510 | + | + | + |   |
| At5g23520 |   | + | + |   |
| At5g23530 | + | + | + |   |
| At5g23540 | + | + | + |   |
| At5g23550 | + | + | + |   |
| At5g23570 | + | + | + |   |
| At5g23580 | + | + | + |   |
| At5g23590 | + | + | + |   |
| At5g23610 | + | + | + |   |
| At5g23630 | + | + | + |   |
| At5g23660 | + | + | + |   |
| At5g23670 | + | + | + |   |
| At5g23680 | + |   |   |   |
| At5g23690 |   | + | + |   |
| At5g23710 | + | + | + |   |
| At5g23720 | + | + | + |   |
| At5g23730 | + | + | + |   |
| At5g23740 | + | + | + |   |
| At5g23750 | + | + | + |   |
| At5g23760 | + | + | + |   |
| At5g23770 | + | + | + |   |
| At5g23780 |   | + |   | + |
| At5g23810 | + | + | + |   |
| At5g23820 |   | + | + |   |
| At5g23850 | + | + | + |   |
| At5g23860 | + | + | + |   |
| At5g23870 | + | + | + |   |
| At5g23880 | + | + | + |   |
| At5g23890 | + | + | + |   |
| At5g23900 | + | + | + |   |
| At5g23910 | + | + | + |   |
| At5g23920 | + | + | + |   |
| At5g23940 | + | + | + |   |
| At5g23960 |   | + |   | + |

|           |   |   |   |   |
|-----------|---|---|---|---|
| At5g23970 | + |   | + |   |
| At5g24000 | + | + | + |   |
| At5g24010 | + | + | + |   |
| At5g24020 | + | + | + |   |
| At5g24030 | + | + | + |   |
| At5g24090 | + |   |   |   |
| At5g24120 | + | + | + |   |
| At5g24130 | + |   |   |   |
| At5g24150 | + | + | + |   |
| At5g24160 | + | + | + |   |
| At5g24165 | + | + | + |   |
| At5g24170 | + | + | + |   |
| At5g24210 |   | + |   |   |
| At5g24240 | + | + |   |   |
| At5g24260 | + | + | + |   |
| At5g24270 |   | + |   |   |
| At5g24280 | + | + | + |   |
| At5g24290 | + | + | + |   |
| At5g24300 | + | + | + |   |
| At5g24310 | + | + | + |   |
| At5g24316 |   | + | + | + |
| At5g24320 | + | + | + |   |
| At5g24340 | + |   | + |   |
| At5g24350 | + | + | + |   |
| At5g24360 | + | + | + |   |
| At5g24390 | + |   | + |   |
| At5g24400 | + | + | + |   |
| At5g24420 | + | + | + |   |
| At5g24430 | + | + | + |   |
| At5g24450 | + | + | + |   |
| At5g24460 | + | + | + |   |
| At5g24480 | + | + |   |   |
| At5g24490 | + | + | + |   |
| At5g24500 | + | + | + |   |
| At5g24510 |   |   | + | + |
| At5g24520 | + | + | + |   |
| At5g24530 | + | + | + |   |
| At5g24570 | + | + | + |   |
| At5g24580 | + | + | + |   |
| At5g24590 | + | + | + |   |
| At5g24600 | + | + | + |   |
| At5g24610 | + | + | + |   |
| At5g24620 | + | + | + |   |
| At5g24630 | + | + | + |   |
| At5g24650 | + | + | + |   |
| At5g24655 | + | + |   |   |
| At5g24660 | + | + | + |   |
| At5g24670 | + | + | + |   |
| At5g24690 | + | + | + |   |
| At5g24690 | + | + | + |   |
| At5g24710 | + |   |   |   |
| At5g24710 | + | + | + |   |

|           |   |   |   |   |
|-----------|---|---|---|---|
| At5g24740 | + | + | + |   |
| At5g24760 | + | + | + |   |
| At5g24780 | + | + | + |   |
| At5g24800 | + | + | + |   |
| At5g24810 | + | + | + |   |
| At5g24830 | + | + | + |   |
| At5g24840 | + | + | + |   |
| At5g24850 | + | + | + |   |
| At5g24860 | + | + | + |   |
| At5g24870 | + | + | + |   |
| At5g24890 | + | + | + |   |
| At5g24910 | + |   | + |   |
| At5g24930 | + | + | + |   |
| At5g24970 | + | + | + |   |
| At5g24980 |   |   | + |   |
| At5g25020 | + | + | + |   |
| At5g25040 | + | + | + |   |
| At5g25060 | + | + | + |   |
| At5g25070 | + | + | + |   |
| At5g25080 | + | + | + |   |
| At5g25090 | + | + | + |   |
| At5g25100 | + | + | + |   |
| At5g25130 |   | + |   |   |
| At5g25150 | + | + | + |   |
| At5g25170 | + | + | + |   |
| At5g25190 | + | + | + |   |
| At5g25210 | + |   | + |   |
| At5g25220 | + | + | + |   |
| At5g25240 | + | + | + |   |
| At5g25270 | + | + | + |   |
| At5g25280 | + | + | + |   |
| At5g25340 | + | + | + | + |
| At5g25350 | + | + | + |   |
| At5g25360 | + | + | + |   |
| At5g25380 | + | + | + |   |
| At5g25390 | + | + | + | + |
| At5g25400 | + |   |   | + |
| At5g25430 |   | + |   | + |
| At5g25450 | + | + | + |   |
| At5g25460 | + | + | + |   |
| At5g25470 | + | + | + | + |
| At5g25475 | + | + | + |   |
| At5g25480 | + | + | + |   |
| At5g25490 | + | + | + |   |
| At5g25510 | + | + | + |   |
| At5g25520 | + | + | + |   |
| At5g25530 |   | + |   |   |
| At5g25540 | + | + | + |   |
| At5g25550 | + |   |   | + |
| At5g25560 | + | + | + |   |
| At5g25570 | + | + | + |   |
| At5g25580 | + | + | + | + |

|           |   |   |   |   |
|-----------|---|---|---|---|
| At5g25590 | + | + | + |   |
| At5g25610 | + | + | + |   |
| At5g25620 |   |   | + | + |
| At5g25630 | + | + | + |   |
| At5g25760 | + | + | + |   |
| At5g25770 | + | + | + |   |
| At5g25780 | + | + | + |   |
| At5g25800 | + | + | + |   |
| At5g25810 |   |   | + |   |
| At5g25830 | + | + | + |   |
| At5g25840 | + |   |   |   |
| At5g25880 | + | + | + |   |
| At5g25890 |   | + | + |   |
| At5g25900 | + | + | + |   |
| At5g25930 | + | + | + |   |
| At5g25940 | + | + | + |   |
| At5g25980 | + | + | + |   |
| At5g26030 | + | + | + |   |
| At5g26040 | + | + |   |   |
| At5g26060 | + | + |   | + |
| At5g26110 | + | + | + |   |
| At5g26190 | + |   | + |   |
| At5g26210 | + | + | + |   |
| At5g26220 | + | + | + |   |
| At5g26230 | + |   |   |   |
| At5g26240 | + | + | + |   |
| At5g26270 | + | + | + |   |
| At5g26310 |   | + |   |   |
| At5g26330 | + |   | + |   |
| At5g26340 | + | + | + |   |
| At5g26360 | + | + | + |   |
| At5g26570 | + | + | + |   |
| At5g26595 | + | + | + |   |
| At5g26605 | + | + | + |   |
| At5g26625 |   |   | + | + |
| At5g26655 |   | + | + |   |
| At5g26665 | + | + | + |   |
| At5g26675 | + | + | + |   |
| At5g26696 | + | + | + | + |
| At5g26707 | + | + | + |   |
| At5g26718 | + | + | + |   |
| At5g26731 | + | + | + |   |
| At5g26734 | + | + | + |   |
| At5g26760 | + | + | + |   |
| At5g26770 | + |   |   |   |
| At5g26780 | + | + | + |   |
| At5g26790 | + | + | + |   |
| At5g26820 | + | + | + |   |
| At5g26830 | + | + | + |   |
| At5g26850 | + | + | + |   |
| At5g26860 | + | + | + |   |
| At5g26880 | + | + | + |   |



|           |   |   |   |
|-----------|---|---|---|
| At5g26910 | + | + | + |
| At5g26940 | + | + | + |
| At5g26960 | + | + | + |
| At5g26990 | + | + | + |
| At5g27000 | + | + |   |
| At5g27010 | + | + | + |
| At5g27110 |   | + |   |
| At5g27120 | + | + | + |
| At5g27150 | + | + | + |
| At5g27200 | + |   |   |
| At5g27210 | + | + | + |
| At5g27220 | + | + | + |
| At5g27240 | + | + | + |
| At5g27280 | + | + | + |
| At5g27290 | + | + | + |
| At5g27320 | + |   |   |
| At5g27330 | + | + | + |
| At5g27350 | + | + | + |
| At5g27360 | + | + | + |
| At5g27380 | + | + | + |
| At5g27390 | + | + | + |
| At5g27400 | + | + | + |
| At5g27410 | + | + | + |
| At5g27430 | + | + | + |
| At5g27440 |   |   | + |
| At5g27450 | + | + | + |
| At5g27460 | + | + |   |
| At5g27470 | + | + | + |
| At5g27490 | + | + | + |
| At5g27520 | + | + | + |
| At5g27540 | + | + | + |
| At5g27550 | + | + | + |
| At5g27560 | + | + | + |
| At5g27600 | + | + | + |
| At5g27620 | + |   | + |
| At5g27630 | + | + | + |
| At5g27650 | + | + | + |
| At5g27660 | + | + | + |
| At5g27670 | + | + | + |
| At5g27680 | + |   |   |
| At5g27700 | + | + | + |
| At5g27710 | + | + | + |
| At5g27720 | + | + | + |
| At5g27730 | + | + | + |
| At5g27740 | + | + | + |
| At5g27750 | + | + |   |
| At5g27760 | + | + | + |
| At5g27770 | + | + | + |
| At5g27800 |   | + |   |
| At5g27820 | + | + | + |
| At5g27830 | + | + | + |
| At5g27840 | + | + | + |

|           |   |   |   |   |
|-----------|---|---|---|---|
| At5g27850 | + | + | + |   |
| At5g27860 | + | + | + |   |
| At5g27870 | + | + |   | + |
| At5g27920 | + | + | + |   |
| At5g27930 | + | + | + |   |
| At5g27950 | + | + | + |   |
| At5g27970 | + | + | + |   |
| At5g27980 | + |   |   | + |
| At5g27990 | + | + | + |   |
| At5g28020 | + | + | + |   |
| At5g28030 | + | + | + |   |
| At5g28040 | + | + | + |   |
| At5g28050 | + | + | + |   |
| At5g28060 | + | + | + |   |
| At5g28150 | + | + | + |   |
| At5g28220 | + | + | + |   |
| At5g28290 | + | + | + |   |
| At5g28300 | + | + | + |   |
| At5g28350 | + | + | + |   |
| At5g28400 | + | + |   |   |
| At5g28460 | + | + | + |   |
| At5g28470 | + |   |   | + |
| At5g28500 | + | + | + |   |
| At5g28530 | + | + | + |   |
| At5g28540 | + | + | + |   |
| At5g28640 | + | + | + |   |
| At5g28680 | + | + | + | + |
| At5g28740 | + | + | + |   |
| At5g28750 | + | + | + |   |
| At5g28770 | + | + | + |   |
| At5g28800 | + |   |   |   |
| At5g28840 | + | + | + |   |
| At5g28900 | + | + | + |   |
| At5g28910 | + | + | + |   |
| At5g29000 |   | + | + |   |
| At5g29771 | + | + | + |   |
| At5g30145 | + | + | + |   |
| At5g32440 | + | + | + |   |
| At5g32450 | + | + | + |   |
| At5g32460 |   | + | + |   |
| At5g32470 | + | + | + |   |
| At5g33280 | + | + | + |   |
| At5g33290 | + | + | + |   |
| At5g33300 | + | + | + |   |
| At5g33320 | + | + | + |   |
| At5g33340 |   | + | + | + |
| At5g33370 | + | + | + | + |
| At5g33390 |   | + |   | + |
| At5g34850 | + | + | + |   |
| At5g34885 |   | + |   | + |
| At5g34930 | + | + | + |   |
| At5g34940 | + | + | + |   |

|           |   |   |   |   |
|-----------|---|---|---|---|
| At5g35080 | + | + | + |   |
| At5g35090 | + | + |   | + |
| At5g35100 | + | + | + |   |
| At5g35130 |   |   | + |   |
| At5g35160 | + | + | + |   |
| At5g35170 | + | + | + |   |
| At5g35180 | + | + | + |   |
| At5g35200 | + | + | + |   |
| At5g35210 | + | + | + |   |
| At5g35320 | + | + |   |   |
| At5g35330 | + | + | + |   |
| At5g35350 | + |   |   |   |
| At5g35360 | + | + | + |   |
| At5g35390 |   | + |   |   |
| At5g35400 | + | + | + |   |
| At5g35410 | + | + | + |   |
| At5g35430 | + |   | + |   |
| At5g35440 | + | + | + |   |
| At5g35450 |   | + |   |   |
| At5g35460 | + | + | + |   |
| At5g35530 | + | + | + |   |
| At5g35550 |   |   | + | + |
| At5g35560 | + | + | + |   |
| At5g35570 | + | + | + |   |
| At5g35620 | + | + | + |   |
| At5g35630 | + | + | + |   |
| At5g35670 | + | + | + |   |
| At5g35680 | + | + | + |   |
| At5g35700 | + | + | + |   |
| At5g35730 | + | + | + |   |
| At5g35735 |   | + | + |   |
| At5g35740 | + |   | + |   |
| At5g35750 | + | + | + |   |
| At5g35790 | + | + | + |   |
| At5g35840 | + | + | + |   |
| At5g35910 | + | + | + |   |
| At5g35930 | + | + | + |   |
| At5g35970 | + | + | + |   |
| At5g35980 | + | + | + |   |
| At5g35990 | + | + | + |   |
| At5g36120 | + | + | + |   |
| At5g36150 | + |   |   |   |
| At5g36160 | + | + | + |   |
| At5g36170 | + | + | + |   |
| At5g36210 | + | + | + |   |
| At5g36230 | + | + | + |   |
| At5g36250 | + | + | + |   |
| At5g36260 | + | + | + |   |
| At5g36290 | + | + | + |   |
| At5g36670 | + | + | + | + |
| At5g36700 | + | + | + |   |
| At5g36710 | + | + | + |   |

|           |   |   |   |   |
|-----------|---|---|---|---|
| At5g36880 | + | + | + |   |
| At5g36890 | + | + | + |   |
| At5g36940 | + | + |   |   |
| At5g36950 | + | + | + |   |
| At5g37010 | + | + | + |   |
| At5g37020 | + | + | + |   |
| At5g37055 | + | + | + |   |
| At5g37060 | + |   |   | + |
| At5g37070 | + | + | + |   |
| At5g37130 | + | + | + |   |
| At5g37170 | + | + |   | + |
| At5g37180 | + | + | + |   |
| At5g37230 | + |   |   |   |
| At5g37260 | + | + | + |   |
| At5g37300 | + | + | + | + |
| At5g37310 | + | + | + |   |
| At5g37350 | + | + | + |   |
| At5g37360 | + | + | + |   |
| At5g37370 | + | + | + |   |
| At5g37380 | + | + | + |   |
| At5g37440 | + | + |   |   |
| At5g37480 | + | + | + |   |
| At5g37490 |   | + |   |   |
| At5g37500 |   |   | + |   |
| At5g37510 | + | + | + |   |
| At5g37530 | + | + | + | + |
| At5g37540 | + | + | + |   |
| At5g37550 |   | + |   |   |
| At5g37580 | + | + | + |   |
| At5g37590 | + |   |   |   |
| At5g37600 | + | + | + |   |
| At5g37670 |   |   | + |   |
| At5g37680 | + | + | + |   |
| At5g37690 |   |   | + |   |
| At5g37710 | + | + | + |   |
| At5g37730 |   |   | + | + |
| At5g37740 | + | + | + |   |
| At5g37770 | + | + | + |   |
| At5g37780 | + | + | + |   |
| At5g37790 | + | + | + |   |
| At5g37810 | + | + |   | + |
| At5g37830 | + | + | + |   |
| At5g37850 | + | + | + |   |
| At5g37890 | + | + | + |   |
| At5g37930 | + | + | + |   |
| At5g38070 | + | + | + |   |
| At5g38110 | + | + | + |   |
| At5g38120 | + | + | + |   |
| At5g38130 |   | + | + | + |
| At5g38140 | + | + | + |   |
| At5g38150 | + | + | + |   |
| At5g38195 |   |   | + | + |

|           |   |   |   |   |
|-----------|---|---|---|---|
| At5g38220 | + | + | + |   |
| At5g38240 |   | + | + |   |
| At5g38290 |   | + | + |   |
| At5g38310 | + | + |   |   |
| At5g38330 |   | + |   | + |
| At5g38340 |   |   | + |   |
| At5g38360 | + | + | + |   |
| At5g38380 | + | + | + |   |
| At5g38440 | + | + |   |   |
| At5g38460 | + | + | + |   |
| At5g38470 | + | + | + |   |
| At5g38480 | + | + | + |   |
| At5g38510 | + | + | + |   |
| At5g38520 | + | + | + |   |
| At5g38530 |   | + | + |   |
| At5g38560 | + | + | + |   |
| At5g38630 | + | + | + |   |
| At5g38650 | + | + | + |   |
| At5g38660 | + | + | + |   |
| At5g38690 | + | + | + |   |
| At5g38710 | + | + | + |   |
| At5g38720 | + | + | + |   |
| At5g38730 | + | + | + |   |
| At5g38760 | + | + | + | + |
| At5g38820 | + | + | + |   |
| At5g38830 | + | + | + |   |
| At5g38840 | + | + | + |   |
| At5g38850 |   | + |   |   |
| At5g38880 | + | + | + |   |
| At5g38890 | + | + | + |   |
| At5g38895 | + | + | + |   |
| At5g38900 |   | + | + |   |
| At5g38980 | + | + | + |   |
| At5g38990 | + | + | + |   |
| At5g39040 | + | + | + |   |
| At5g39050 | + | + | + |   |
| At5g39080 |   | + | + |   |
| At5g39100 |   | + |   |   |
| At5g39130 |   |   | + | + |
| At5g39190 |   |   | + |   |
| At5g39210 | + |   | + |   |
| At5g39220 | + | + | + |   |
| At5g39250 | + | + | + |   |
| At5g39280 |   |   | + | + |
| At5g39310 | + |   |   | + |
| At5g39320 | + | + | + |   |
| At5g39340 | + | + | + |   |
| At5g39360 | + | + | + |   |
| At5g39400 | + | + | + | + |
| At5g39410 | + | + | + |   |
| At5g39420 | + | + | + | + |
| At5g39500 | + | + | + |   |

|           |   |   |   |   |
|-----------|---|---|---|---|
| At5g39510 | + | + | + |   |
| At5g39520 |   | + | + |   |
| At5g39550 | + | + | + |   |
| At5g39560 | + |   |   |   |
| At5g39570 | + | + | + |   |
| At5g39580 | + | + | + |   |
| At5g39590 | + | + | + |   |
| At5g39600 | + | + | + |   |
| At5g39610 | + | + | + |   |
| At5g39650 | + |   |   | + |
| At5g39660 | + | + | + |   |
| At5g39670 | + | + | + |   |
| At5g39710 | + | + | + |   |
| At5g39730 | + | + | + |   |
| At5g39740 | + | + | + |   |
| At5g39760 | + | + |   |   |
| At5g39780 | + | + | + | + |
| At5g39785 | + | + | + |   |
| At5g39790 | + | + | + |   |
| At5g39800 | + | + | + |   |
| At5g39830 | + | + | + |   |
| At5g39840 | + | + | + | + |
| At5g39850 | + | + | + |   |
| At5g39860 | + | + | + |   |
| At5g39870 | + |   |   | + |
| At5g39880 | + | + | + | + |
| At5g39890 | + | + | + |   |
| At5g39900 | + | + | + |   |
| At5g39910 | + |   |   | + |
| At5g39940 | + | + | + |   |
| At5g39950 | + | + | + |   |
| At5g39960 | + | + | + |   |
| At5g39980 |   |   | + |   |
| At5g39990 | + | + | + |   |
| At5g40020 |   |   | + |   |
| At5g40040 | + |   |   | + |
| At5g40060 | + | + | + |   |
| At5g40140 |   |   | + |   |
| At5g40150 | + | + | + |   |
| At5g40155 |   | + | + | + |
| At5g40160 | + | + | + |   |
| At5g40170 | + | + | + |   |
| At5g40190 | + | + | + |   |
| At5g40200 | + | + | + |   |
| At5g40210 | + | + | + |   |
| At5g40250 | + | + | + |   |
| At5g40260 | + | + | + | + |
| At5g40270 | + | + | + |   |
| At5g40280 |   |   | + | + |
| At5g40300 | + | + | + |   |
| At5g40340 | + | + | + |   |
| At5g40350 | + | + |   | + |

|           |   |   |   |   |
|-----------|---|---|---|---|
| At5g40370 | + | + | + |   |
| At5g40380 | + | + | + |   |
| At5g40390 | + | + | + |   |
| At5g40440 | + | + | + | + |
| At5g40450 | + | + | + |   |
| At5g40460 | + | + | + |   |
| At5g40470 | + | + | + |   |
| At5g40480 | + | + | + |   |
| At5g40490 | + | + |   |   |
| At5g40500 | + | + | + |   |
| At5g40520 | + | + |   |   |
| At5g40530 | + | + | + |   |
| At5g40540 |   |   | + |   |
| At5g40550 | + | + | + |   |
| At5g40580 | + | + | + |   |
| At5g40600 | + | + | + |   |
| At5g40610 | + | + | + |   |
| At5g40630 | + |   |   |   |
| At5g40640 | + | + | + |   |
| At5g40650 | + | + | + |   |
| At5g40660 | + | + | + |   |
| At5g40670 | + | + | + |   |
| At5g40690 |   | + | + |   |
| At5g40710 | + | + | + |   |
| At5g40730 | + | + | + |   |
| At5g40740 | + | + | + |   |
| At5g40760 | + | + | + |   |
| At5g40770 | + | + | + |   |
| At5g40780 | + | + | + |   |
| At5g40810 | + | + | + |   |
| At5g40820 | + | + | + |   |
| At5g40830 | + | + | + |   |
| At5g40840 | + | + | + |   |
| At5g40850 | + | + | + |   |
| At5g40870 | + | + | + |   |
| At5g40880 | + | + | + |   |
| At5g40890 | + | + | + |   |
| At5g40910 | + | + | + |   |
| At5g40920 | + | + | + |   |
| At5g40930 | + | + | + |   |
| At5g40950 | + | + | + |   |
| At5g40960 | + | + | + |   |
| At5g40970 | + | + | + |   |
| At5g40980 | + | + | + |   |
| At5g41000 | + |   | + |   |
| At5g41010 | + | + | + |   |
| At5g41040 | + | + | + |   |
| At5g41050 | + | + | + |   |
| At5g41060 | + | + | + |   |
| At5g41070 | + | + | + | + |
| At5g41080 | + | + | + |   |
| At5g41090 | + |   |   |   |

|           |   |   |   |   |
|-----------|---|---|---|---|
| At5g41100 | + | + | + |   |
| At5g41150 | + | + | + |   |
| At5g41180 | + | + | + |   |
| At5g41190 | + | + | + |   |
| At5g41210 | + | + | + |   |
| At5g41220 | + | + | + |   |
| At5g41240 | + |   | + |   |
| At5g41260 | + | + | + |   |
| At5g41270 | + | + | + |   |
| At5g41330 | + | + | + |   |
| At5g41340 | + | + | + |   |
| At5g41350 | + | + | + |   |
| At5g41370 | + | + | + |   |
| At5g41400 |   | + | + |   |
| At5g41410 | + | + | + |   |
| At5g41460 | + | + | + |   |
| At5g41480 | + | + | + |   |
| At5g41520 | + | + | + |   |
| At5g41560 | + | + | + |   |
| At5g41580 | + | + | + |   |
| At5g41600 | + | + | + |   |
| At5g41610 |   |   | + |   |
| At5g41670 | + | + | + |   |
| At5g41685 | + | + | + |   |
| At5g41700 | + | + | + |   |
| At5g41740 | + | + |   |   |
| At5g41760 | + | + | + |   |
| At5g41770 | + | + | + |   |
| At5g41780 | + |   |   | + |
| At5g41790 | + | + | + |   |
| At5g41810 | + | + | + |   |
| At5g41850 | + | + | + |   |
| At5g41870 | + | + | + | + |
| At5g41880 | + | + | + |   |
| At5g41900 | + | + | + |   |
| At5g41920 | + |   | + |   |
| At5g41940 | + | + | + |   |
| At5g41950 | + | + | + |   |
| At5g41960 | + | + | + |   |
| At5g41970 | + | + | + |   |
| At5g41990 | + | + | + |   |
| At5g42000 | + | + | + |   |
| At5g42010 | + | + |   |   |
| At5g42030 | + | + | + |   |
| At5g42050 | + | + | + |   |
| At5g42060 | + | + | + |   |
| At5g42070 | + | + | + |   |
| At5g42080 | + | + | + |   |
| At5g42090 | + | + | + |   |
| At5g42100 | + | + | + |   |
| At5g42110 | + |   |   |   |
| At5g42130 | + | + | + |   |



|           |   |   |   |   |
|-----------|---|---|---|---|
| At5g42140 | + | + | + |   |
| At5g42150 | + | + | + |   |
| At5g42170 | + | + | + |   |
| At5g42180 |   |   | + |   |
| At5g42190 | + | + | + |   |
| At5g42200 | + | + | + |   |
| At5g42220 | + | + | + |   |
| At5g42230 | + | + | + | + |
| At5g42240 | + | + | + |   |
| At5g42250 |   | + |   |   |
| At5g42260 | + | + |   | + |
| At5g42270 | + | + | + |   |
| At5g42280 | + |   |   |   |
| At5g42300 | + | + | + |   |
| At5g42310 | + | + | + |   |
| At5g42320 | + | + | + |   |
| At5g42340 | + | + |   | + |
| At5g42360 | + | + | + |   |
| At5g42370 | + | + | + |   |
| At5g42390 | + | + | + |   |
| At5g42400 | + | + | + |   |
| At5g42420 | + | + | + |   |
| At5g42450 |   |   | + |   |
| At5g42470 | + | + | + |   |
| At5g42480 | + | + | + |   |
| At5g42490 | + | + |   | + |
| At5g42520 | + | + | + |   |
| At5g42540 | + | + | + |   |
| At5g42560 | + | + | + |   |
| At5g42570 | + | + | + |   |
| At5g42620 | + | + | + |   |
| At5g42630 | + | + | + |   |
| At5g42640 |   |   | + | + |
| At5g42650 | + | + | + |   |
| At5g42660 | + | + | + |   |
| At5g42670 | + | + | + |   |
| At5g42680 |   | + | + |   |
| At5g42690 | + |   | + |   |
| At5g42700 | + |   | + |   |
| At5g42720 | + | + | + |   |
| At5g42740 | + | + | + |   |
| At5g42750 | + | + | + |   |
| At5g42760 | + | + | + |   |
| At5g42765 | + | + | + |   |
| At5g42780 | + | + | + |   |
| At5g42790 | + | + | + |   |
| At5g42800 |   | + | + |   |
| At5g42810 | + | + | + |   |
| At5g42820 | + | + | + |   |
| At5g42850 | + | + | + |   |
| At5g42860 | + | + | + |   |
| At5g42870 | + | + | + |   |

|           |   |   |   |   |
|-----------|---|---|---|---|
| At5g42880 | + | + | + |   |
| At5g42890 | + | + | + |   |
| At5g42900 | + |   |   |   |
| At5g42920 | + | + | + |   |
| At5g42940 | + | + | + |   |
| At5g42950 | + | + | + |   |
| At5g42955 |   | + |   | + |
| At5g42960 | + | + | + |   |
| At5g42970 | + | + | + |   |
| At5g42980 | + | + | + |   |
| At5g42990 | + | + | + |   |
| At5g43010 | + | + | + |   |
| At5g43020 | + | + | + |   |
| At5g43040 | + |   | + |   |
| At5g43060 | + | + | + |   |
| At5g43070 | + | + | + |   |
| At5g43080 | + | + | + |   |
| At5g43100 | + | + | + |   |
| At5g43130 | + | + | + |   |
| At5g43140 | + | + | + |   |
| At5g43150 | + | + | + |   |
| At5g43170 | + |   | + |   |
| At5g43180 |   |   | + |   |
| At5g43190 | + | + | + |   |
| At5g43230 | + | + |   |   |
| At5g43260 | + | + | + |   |
| At5g43270 | + | + | + |   |
| At5g43280 | + | + | + |   |
| At5g43310 | + | + | + |   |
| At5g43320 | + | + | + |   |
| At5g43330 | + | + | + |   |
| At5g43340 | + |   |   | + |
| At5g43380 | + | + | + |   |
| At5g43430 | + | + | + |   |
| At5g43450 | + | + | + |   |
| At5g43460 | + | + | + |   |
| At5g43490 | + | + | + |   |
| At5g43500 | + | + | + |   |
| At5g43510 |   | + |   | + |
| At5g43560 | + | + | + |   |
| At5g43600 | + | + | + |   |
| At5g43640 |   |   | + |   |
| At5g43670 | + |   | + |   |
| At5g43680 | + | + | + |   |
| At5g43700 | + | + | + |   |
| At5g43710 | + | + | + |   |
| At5g43720 | + | + | + |   |
| At5g43730 |   |   | + |   |
| At5g43740 | + | + |   |   |
| At5g43745 | + |   | + |   |
| At5g43750 | + | + | + |   |
| At5g43760 | + | + | + |   |

|           |   |   |   |   |
|-----------|---|---|---|---|
| At5g43780 | + | + | + |   |
| At5g43790 |   |   | + |   |
| At5g43810 | + | + | + |   |
| At5g43820 | + | + | + |   |
| At5g43830 | + | + | + |   |
| At5g43850 | + | + | + |   |
| At5g43870 | + | + | + |   |
| At5g43880 | + | + | + |   |
| At5g43900 | + | + | + |   |
| At5g43910 |   | + | + |   |
| At5g43920 | + | + | + |   |
| At5g43930 | + | + | + |   |
| At5g43940 | + | + | + |   |
| At5g43960 | + | + | + |   |
| At5g43970 | + | + | + |   |
| At5g43990 | + | + | + |   |
| At5g44000 | + | + | + |   |
| At5g44020 | + | + | + |   |
| At5g44030 | + | + | + |   |
| At5g44060 | + | + | + |   |
| At5g44070 | + | + | + |   |
| At5g44080 | + | + | + |   |
| At5g44090 | + | + | + |   |
| At5g44110 | + | + | + |   |
| At5g44130 | + | + | + |   |
| At5g44150 | + | + | + |   |
| At5g44170 | + | + | + |   |
| At5g44180 | + | + | + |   |
| At5g44190 | + | + | + |   |
| At5g44200 | + | + | + |   |
| At5g44210 |   | + |   |   |
| At5g44240 | + | + | + |   |
| At5g44250 | + | + | + |   |
| At5g44290 | + | + | + |   |
| At5g44300 | + |   |   | + |
| At5g44320 | + | + | + |   |
| At5g44340 | + | + | + |   |
| At5g44350 | + | + | + |   |
| At5g44370 | + | + | + |   |
| At5g44390 |   |   | + |   |
| At5g44400 | + |   |   |   |
| At5g44410 | + | + | + |   |
| At5g44450 | + | + | + |   |
| At5g44500 | + | + | + | + |
| At5g44510 | + |   |   |   |
| At5g44520 | + | + | + |   |
| At5g44530 | + | + | + |   |
| At5g44560 | + | + | + |   |
| At5g44580 |   | + | + |   |
| At5g44610 |   | + | + |   |
| At5g44620 | + | + | + | + |
| At5g44630 | + | + | + | + |

|           |   |   |   |   |
|-----------|---|---|---|---|
| At5g44650 | + | + | + |   |
| At5g44660 | + |   |   |   |
| At5g44670 | + | + | + |   |
| At5g44680 | + | + | + |   |
| At5g44700 | + | + | + |   |
| At5g44710 | + | + | + |   |
| At5g44720 | + | + | + |   |
| At5g44730 | + | + | + |   |
| At5g44750 | + | + | + |   |
| At5g44780 | + | + | + |   |
| At5g44785 | + | + | + |   |
| At5g44790 | + | + | + |   |
| At5g44800 | + | + | + |   |
| At5g44820 |   |   | + |   |
| At5g44860 | + | + | + |   |
| At5g44870 | + | + | + |   |
| At5g44880 | + | + |   |   |
| At5g44930 | + |   |   |   |
| At5g44980 | + |   |   |   |
| At5g45010 | + | + | + |   |
| At5g45020 | + | + | + |   |
| At5g45040 | + | + | + |   |
| At5g45050 | + | + | + |   |
| At5g45110 | + | + | + |   |
| At5g45130 | + | + | + |   |
| At5g45140 | + | + | + |   |
| At5g45160 | + | + | + |   |
| At5g45170 | + | + | + |   |
| At5g45190 | + | + | + |   |
| At5g45260 | + |   | + |   |
| At5g45270 | + | + | + |   |
| At5g45280 | + | + | + |   |
| At5g45300 | + | + | + |   |
| At5g45320 |   |   | + |   |
| At5g45340 | + | + | + |   |
| At5g45350 | + | + | + |   |
| At5g45360 | + | + | + |   |
| At5g45370 | + | + | + |   |
| At5g45380 | + | + | + |   |
| At5g45390 | + | + | + |   |
| At5g45400 |   |   | + |   |
| At5g45410 | + | + | + |   |
| At5g45430 | + | + | + |   |
| At5g45490 | + | + | + |   |
| At5g45530 |   |   | + |   |
| At5g45540 | + | + | + |   |
| At5g45550 | + | + | + |   |
| At5g45560 | + | + | + | + |
| At5g45590 | + | + | + |   |
| At5g45600 | + | + | + |   |
| At5g45610 | + | + | + |   |
| At5g45620 | + | + | + |   |

|           |   |   |   |   |
|-----------|---|---|---|---|
| At5g45630 | + | + |   |   |
| At5g45650 | + | + | + |   |
| At5g45670 | + | + | + |   |
| At5g45680 | + | + | + |   |
| At5g45700 | + | + | + |   |
| At5g45710 | + | + | + |   |
| At5g45750 | + | + | + |   |
| At5g45760 | + | + | + |   |
| At5g45800 | + | + | + |   |
| At5g45820 | + | + |   |   |
| At5g45840 | + | + | + |   |
| At5g45880 | + | + | + | + |
| At5g45890 |   | + | + | + |
| At5g45900 | + | + | + |   |
| At5g45910 |   | + | + |   |
| At5g45920 | + | + | + |   |
| At5g45930 | + | + | + |   |
| At5g45940 | + | + | + |   |
| At5g45950 | + | + | + |   |
| At5g45960 | + | + |   | + |
| At5g46010 |   |   | + | + |
| At5g46020 | + | + | + |   |
| At5g46030 | + | + | + |   |
| At5g46040 |   |   | + |   |
| At5g46050 | + | + |   |   |
| At5g46070 | + | + | + |   |
| At5g46080 |   |   | + |   |
| At5g46100 | + | + |   |   |
| At5g46110 | + | + | + |   |
| At5g46115 |   | + |   | + |
| At5g46140 | + | + | + |   |
| At5g46150 | + | + | + |   |
| At5g46160 | + | + | + |   |
| At5g46180 | + | + | + |   |
| At5g46190 | + | + | + |   |
| At5g46200 | + | + |   | + |
| At5g46210 | + | + | + |   |
| At5g46230 | + |   |   |   |
| At5g46240 | + | + | + |   |
| At5g46250 | + | + | + |   |
| At5g46270 | + | + | + |   |
| At5g46280 | + | + | + |   |
| At5g46290 | + | + | + |   |
| At5g46300 |   |   | + | + |
| At5g46320 |   |   | + | + |
| At5g46330 | + | + | + |   |
| At5g46340 | + | + | + |   |
| At5g46390 | + | + | + |   |
| At5g46400 | + | + | + |   |
| At5g46410 | + | + |   |   |
| At5g46420 | + | + | + |   |
| At5g46450 | + |   | + |   |

|           |   |   |   |   |
|-----------|---|---|---|---|
| At5g46460 | + |   | + |   |
| At5g46470 | + | + |   |   |
| At5g46480 | + | + | + |   |
| At5g46540 |   |   | + |   |
| At5g46550 | + | + | + |   |
| At5g46570 | + |   | + |   |
| At5g46580 | + | + | + |   |
| At5g46620 | + | + | + |   |
| At5g46630 | + | + | + |   |
| At5g46640 | + | + | + |   |
| At5g46680 | + |   |   |   |
| At5g46690 | + | + | + |   |
| At5g46700 | + | + | + |   |
| At5g46710 | + | + | + |   |
| At5g46730 | + |   | + |   |
| At5g46750 | + | + | + |   |
| At5g46760 | + | + | + |   |
| At5g46770 | + | + | + | + |
| At5g46780 | + | + | + |   |
| At5g46790 | + | + | + |   |
| At5g46795 | + |   |   | + |
| At5g46800 | + | + | + |   |
| At5g46840 | + | + | + |   |
| At5g46850 | + |   |   |   |
| At5g46860 | + | + | + |   |
| At5g46880 | + |   |   |   |
| At5g46910 | + | + | + |   |
| At5g46920 | + | + | + |   |
| At5g46940 | + |   |   | + |
| At5g46960 | + | + | + | + |
| At5g47000 | + | + | + | + |
| At5g47010 | + | + | + |   |
| At5g47020 | + | + | + |   |
| At5g47030 | + | + | + |   |
| At5g47040 | + | + | + |   |
| At5g47050 | + | + | + |   |
| At5g47060 | + | + | + |   |
| At5g47070 | + | + | + |   |
| At5g47080 | + | + | + |   |
| At5g47090 | + |   | + |   |
| At5g47100 | + | + | + |   |
| At5g47110 | + | + | + |   |
| At5g47120 | + | + | + |   |
| At5g47150 | + | + | + | + |
| At5g47160 | + |   |   | + |
| At5g47180 | + | + | + |   |
| At5g47190 | + | + | + |   |
| At5g47200 | + | + | + |   |
| At5g47210 | + | + | + |   |
| At5g47230 | + |   |   |   |
| At5g47240 | + | + | + |   |
| At5g47250 | + | + | + |   |

|           |   |   |   |   |
|-----------|---|---|---|---|
| At5g47310 | + | + | + |   |
| At5g47320 | + | + | + |   |
| At5g47330 | + | + | + | + |
| At5g47340 |   |   | + |   |
| At5g47350 | + | + | + |   |
| At5g47360 |   |   | + |   |
| At5g47370 | + | + | + |   |
| At5g47390 | + | + | + |   |
| At5g47400 | + | + | + |   |
| At5g47410 | + | + | + |   |
| At5g47420 | + | + | + |   |
| At5g47430 | + | + | + |   |
| At5g47435 | + | + | + |   |
| At5g47455 |   | + | + |   |
| At5g47470 | + | + |   |   |
| At5g47480 | + | + | + |   |
| At5g47490 | + | + | + |   |
| At5g47500 | + | + | + |   |
| At5g47520 | + | + | + |   |
| At5g47530 | + | + | + |   |
| At5g47540 | + | + | + |   |
| At5g47550 | + | + | + |   |
| At5g47560 | + | + | + |   |
| At5g47570 | + | + | + |   |
| At5g47580 | + | + |   |   |
| At5g47600 | + |   |   | + |
| At5g47610 | + | + | + |   |
| At5g47620 | + | + | + |   |
| At5g47630 | + | + | + |   |
| At5g47635 | + |   |   |   |
| At5g47640 | + | + | + |   |
| At5g47650 | + | + | + |   |
| At5g47680 | + | + | + |   |
| At5g47690 | + | + | + |   |
| At5g47700 | + | + | + |   |
| At5g47710 | + | + | + |   |
| At5g47720 | + |   | + |   |
| At5g47730 | + | + | + |   |
| At5g47750 | + | + | + |   |
| At5g47760 | + | + | + |   |
| At5g47770 | + | + | + |   |
| At5g47780 | + | + | + |   |
| At5g47790 | + |   | + |   |
| At5g47800 | + | + | + |   |
| At5g47820 | + | + | + |   |
| At5g47830 | + | + | + |   |
| At5g47840 | + | + | + |   |
| At5g47870 | + | + | + |   |
| At5g47880 | + | + | + |   |
| At5g47890 | + | + | + |   |
| At5g47900 | + | + | + |   |
| At5g47910 | + | + | + |   |

|           |   |   |   |   |
|-----------|---|---|---|---|
| At5g47920 | + | + | + |   |
| At5g47930 | + | + | + |   |
| At5g47940 | + | + | + |   |
| At5g47970 | + | + | + |   |
| At5g48020 | + | + | + |   |
| At5g48030 | + | + | + |   |
| At5g48090 | + | + | + |   |
| At5g48120 | + | + | + |   |
| At5g48140 | + | + | + | + |
| At5g48150 | + | + | + |   |
| At5g48170 | + | + | + |   |
| At5g48180 | + | + | + |   |
| At5g48210 | + |   |   | + |
| At5g48220 | + | + | + |   |
| At5g48230 | + | + | + |   |
| At5g48240 | + | + | + |   |
| At5g48250 | + | + | + |   |
| At5g48260 | + | + | + |   |
| At5g48270 | + |   |   | + |
| At5g48300 | + | + | + |   |
| At5g48310 | + | + | + |   |
| At5g48330 | + |   |   | + |
| At5g48340 | + | + | + |   |
| At5g48350 | + | + | + |   |
| At5g48360 | + | + | + |   |
| At5g48370 | + | + | + |   |
| At5g48380 | + | + | + |   |
| At5g48400 |   | + | + |   |
| At5g48410 |   |   | + |   |
| At5g48430 |   | + |   |   |
| At5g48450 | + | + | + |   |
| At5g48460 | + | + | + |   |
| At5g48470 | + | + | + |   |
| At5g48480 | + | + | + |   |
| At5g48485 | + | + | + |   |
| At5g48490 | + | + | + |   |
| At5g48500 | + | + | + |   |
| At5g48520 | + | + | + |   |
| At5g48540 | + | + | + |   |
| At5g48560 |   | + | + |   |
| At5g48570 | + | + | + |   |
| At5g48580 | + | + | + |   |
| At5g48590 | + | + | + |   |
| At5g48600 | + | + | + |   |
| At5g48630 | + | + | + |   |
| At5g48640 | + | + | + |   |
| At5g48650 | + | + | + | + |
| At5g48655 | + | + | + |   |
| At5g48720 | + | + | + |   |
| At5g48730 | + | + | + |   |
| At5g48760 | + | + | + |   |
| At5g48790 | + | + | + |   |



|           |   |   |   |   |
|-----------|---|---|---|---|
| At5g48800 |   | + | + |   |
| At5g48810 | + | + | + |   |
| At5g48820 | + | + | + |   |
| At5g48830 | + | + | + |   |
| At5g48840 | + | + | + |   |
| At5g48850 | + |   | + |   |
| At5g48870 | + | + | + |   |
| At5g48880 | + | + | + |   |
| At5g48900 | + | + | + |   |
| At5g48910 | + | + | + |   |
| At5g48930 | + | + | + |   |
| At5g48950 | + | + |   |   |
| At5g48960 | + | + | + |   |
| At5g48970 | + | + | + |   |
| At5g48990 | + | + | + |   |
| At5g49000 | + | + | + |   |
| At5g49010 | + | + | + |   |
| At5g49020 | + | + | + |   |
| At5g49030 | + | + | + |   |
| At5g49060 | + | + | + |   |
| At5g49070 | + |   |   |   |
| At5g49100 | + | + | + |   |
| At5g49120 | + | + | + |   |
| At5g49130 | + | + |   | + |
| At5g49160 | + | + | + |   |
| At5g49170 |   | + |   |   |
| At5g49180 | + | + | + | + |
| At5g49210 | + | + | + |   |
| At5g49220 | + | + | + |   |
| At5g49230 | + | + | + |   |
| At5g49270 | + |   |   |   |
| At5g49280 | + | + | + |   |
| At5g49320 | + | + | + |   |
| At5g49330 | + | + | + | + |
| At5g49360 | + | + | + |   |
| At5g49390 | + |   |   |   |
| At5g49400 | + | + | + |   |
| At5g49410 |   | + | + |   |
| At5g49430 | + | + | + |   |
| At5g49450 | + | + | + |   |
| At5g49460 | + | + | + |   |
| At5g49470 | + |   |   | + |
| At5g49480 | + | + | + |   |
| At5g49500 |   |   | + |   |
| At5g49510 | + | + | + |   |
| At5g49520 | + | + | + |   |
| At5g49530 | + | + | + |   |
| At5g49540 | + | + | + |   |
| At5g49550 | + | + | + |   |
| At5g49555 | + | + | + |   |
| At5g49560 | + | + | + |   |
| At5g49570 | + | + | + |   |

|           |   |   |   |
|-----------|---|---|---|
| At5g49580 | + | + | + |
| At5g49610 | + | + | + |
| At5g49630 | + | + | + |
| At5g49640 |   | + |   |
| At5g49650 | + | + | + |
| At5g49660 | + | + | + |
| At5g49680 | + |   |   |
| At5g49710 | + | + | + |
| At5g49720 | + | + | + |
| At5g49730 | + | + | + |
| At5g49760 | + | + | + |
| At5g49810 | + | + | + |
| At5g49820 | + | + | + |
| At5g49830 | + | + | + |
| At5g49840 | + | + | + |
| At5g49880 | + | + | + |
| At5g49890 | + | + | + |
| At5g49900 | + | + | + |
| At5g49910 | + | + | + |
| At5g49930 | + | + | + |
| At5g49940 | + | + | + |
| At5g49945 | + | + | + |
| At5g49950 | + | + | + |
| At5g49970 | + | + | + |
| At5g49980 | + | + | + |
| At5g49990 | + | + | + |
| At5g50000 | + | + | + |
| At5g50010 | + | + | + |
| At5g50020 | + | + | + |
| At5g50030 | + | + | + |
| At5g50100 | + | + | + |
| At5g50110 | + | + | + |
| At5g50130 | + | + | + |
| At5g50160 | + | + | + |
| At5g50170 | + | + | + |
| At5g50180 | + | + | + |
| At5g50200 | + | + | + |
| At5g50210 | + | + | + |
| At5g50230 | + | + | + |
| At5g50240 | + | + | + |
| At5g50250 | + | + | + |
| At5g50260 |   | + | + |
| At5g50270 | + |   | + |
| At5g50280 | + | + | + |
| At5g50310 | + | + | + |
| At5g50320 | + | + | + |
| At5g50330 | + | + | + |
| At5g50335 | + | + | + |
| At5g50340 | + | + | + |
| At5g50350 | + | + | + |
| At5g50370 | + | + | + |
| At5g50375 | + | + | + |

|           |   |   |   |   |
|-----------|---|---|---|---|
| At5g50380 | + | + | + |   |
| At5g50390 | + |   | + |   |
| At5g50400 | + | + | + |   |
| At5g50410 | + | + | + |   |
| At5g50420 | + | + | + |   |
| At5g50440 | + | + | + |   |
| At5g50450 | + | + | + |   |
| At5g50460 | + | + | + |   |
| At5g50530 | + | + | + |   |
| At5g50550 | + | + | + |   |
| At5g50570 | + | + | + |   |
| At5g50580 | + | + | + |   |
| At5g50630 | + | + | + |   |
| At5g50720 | + | + | + |   |
| At5g50730 | + | + | + |   |
| At5g50740 | + |   |   |   |
| At5g50780 | + |   |   |   |
| At5g50790 | + | + | + |   |
| At5g50800 | + | + |   |   |
| At5g50810 | + | + | + |   |
| At5g50820 |   | + |   |   |
| At5g50830 | + | + | + | + |
| At5g50840 | + | + | + |   |
| At5g50850 | + | + | + |   |
| At5g50860 | + | + | + |   |
| At5g50870 | + | + | + |   |
| At5g50900 | + | + | + |   |
| At5g50915 | + | + | + |   |
| At5g50920 | + | + | + |   |
| At5g50930 | + | + | + |   |
| At5g50940 |   |   | + |   |
| At5g50950 | + | + | + |   |
| At5g50960 | + | + | + |   |
| At5g50970 | + | + | + |   |
| At5g51010 | + | + | + |   |
| At5g51020 | + | + | + |   |
| At5g51030 | + | + |   |   |
| At5g51040 | + | + | + |   |
| At5g51050 | + | + | + |   |
| At5g51060 | + |   |   |   |
| At5g51070 | + | + | + |   |
| At5g51080 | + | + |   |   |
| At5g51100 | + | + | + |   |
| At5g51110 | + | + | + |   |
| At5g51120 | + | + | + |   |
| At5g51130 | + | + | + |   |
| At5g51140 | + | + | + |   |
| At5g51170 | + | + | + |   |
| At5g51180 | + | + | + |   |
| At5g51190 | + | + |   |   |
| At5g51200 | + | + | + |   |
| At5g51210 | + | + | + |   |

|           |   |   |   |   |
|-----------|---|---|---|---|
| At5g51220 | + | + | + |   |
| At5g51230 | + |   | + |   |
| At5g51240 | + |   | + |   |
| At5g51260 | + | + | + |   |
| At5g51280 | + | + | + |   |
| At5g51290 | + |   |   |   |
| At5g51300 | + | + | + |   |
| At5g51340 | + | + | + |   |
| At5g51350 | + | + | + |   |
| At5g51390 |   | + | + |   |
| At5g51400 | + | + | + |   |
| At5g51410 | + | + | + |   |
| At5g51430 | + | + | + |   |
| At5g51440 |   |   | + |   |
| At5g51460 | + | + | + |   |
| At5g51480 | + | + | + | + |
| At5g51510 | + | + | + |   |
| At5g51540 | + | + | + |   |
| At5g51550 | + | + | + |   |
| At5g51560 | + | + | + |   |
| At5g51570 | + | + |   |   |
| At5g51590 | + | + | + |   |
| At5g51600 | + |   | + |   |
| At5g51620 | + | + | + |   |
| At5g51630 | + |   |   |   |
| At5g51640 | + | + | + |   |
| At5g51660 | + | + | + |   |
| At5g51690 | + | + | + |   |
| At5g51700 | + | + | + |   |
| At5g51710 | + | + | + |   |
| At5g51720 | + | + | + |   |
| At5g51740 | + | + | + |   |
| At5g51750 | + | + | + |   |
| At5g51770 | + |   | + |   |
| At5g51810 | + | + | + |   |
| At5g51820 | + | + | + |   |
| At5g51830 | + | + | + |   |
| At5g51840 | + | + | + |   |
| At5g51850 | + | + | + | + |
| At5g51880 | + | + | + |   |
| At5g51890 | + | + | + |   |
| At5g51910 | + | + | + |   |
| At5g51940 | + | + | + |   |
| At5g51950 | + | + | + |   |
| At5g51960 | + | + | + |   |
| At5g51970 | + | + | + |   |
| At5g51980 | + | + | + |   |
| At5g52010 | + | + | + |   |
| At5g52030 |   | + | + |   |
| At5g52040 | + | + | + |   |
| At5g52060 | + | + | + |   |
| At5g52070 | + | + | + |   |

|           |   |   |   |   |
|-----------|---|---|---|---|
| At5g52100 | + | + | + |   |
| At5g52110 | + | + | + |   |
| At5g52160 | + |   |   | + |
| At5g52180 | + | + | + |   |
| At5g52190 | + | + | + |   |
| At5g52200 | + | + | + |   |
| At5g52210 | + | + | + |   |
| At5g52220 | + | + | + |   |
| At5g52230 | + | + | + |   |
| At5g52240 | + | + | + |   |
| At5g52250 | + | + | + |   |
| At5g52280 | + | + | + |   |
| At5g52310 | + |   |   |   |
| At5g52320 | + | + | + |   |
| At5g52330 | + |   |   | + |
| At5g52340 | + |   |   | + |
| At5g52360 | + | + | + | + |
| At5g52370 | + | + | + |   |
| At5g52380 | + | + | + |   |
| At5g52390 | + |   | + |   |
| At5g52400 | + | + |   |   |
| At5g52410 | + | + |   | + |
| At5g52420 | + | + | + |   |
| At5g52430 | + | + | + |   |
| At5g52440 | + | + | + |   |
| At5g52450 | + | + | + |   |
| At5g52460 |   | + |   |   |
| At5g52470 | + | + | + |   |
| At5g52510 | + | + | + |   |
| At5g52520 | + | + | + |   |
| At5g52530 | + | + | + |   |
| At5g52540 | + | + | + |   |
| At5g52550 | + | + | + |   |
| At5g52560 | + | + | + |   |
| At5g52570 | + | + | + |   |
| At5g52580 | + | + | + |   |
| At5g52590 | + | + | + |   |
| At5g52620 | + |   |   | + |
| At5g52630 | + | + | + |   |
| At5g52640 | + | + | + |   |
| At5g52650 | + | + | + |   |
| At5g52660 | + | + | + |   |
| At5g52750 | + |   | + |   |
| At5g52780 | + | + | + |   |
| At5g52800 | + |   |   |   |
| At5g52810 | + | + | + |   |
| At5g52820 | + | + | + |   |
| At5g52830 | + | + |   |   |
| At5g52840 | + | + | + |   |
| At5g52860 | + | + | + | + |
| At5g52880 | + | + | + |   |
| At5g52890 | + |   |   | + |

|           |   |   |   |   |
|-----------|---|---|---|---|
| At5g52900 | + | + |   |   |
| At5g52910 |   |   | + |   |
| At5g52920 | + | + | + |   |
| At5g52960 | + | + | + |   |
| At5g52970 | + | + | + |   |
| At5g52975 |   | + |   |   |
| At5g52980 | + | + | + |   |
| At5g53000 | + | + | + |   |
| At5g53010 |   | + | + |   |
| At5g53020 | + | + | + |   |
| At5g53050 | + |   |   |   |
| At5g53060 | + | + | + |   |
| At5g53090 | + |   | + |   |
| At5g53100 |   |   | + |   |
| At5g53110 |   | + |   |   |
| At5g53120 | + | + | + |   |
| At5g53130 | + | + | + |   |
| At5g53140 | + | + | + |   |
| At5g53150 | + | + | + |   |
| At5g53160 | + | + | + |   |
| At5g53170 | + | + | + |   |
| At5g53180 | + | + | + |   |
| At5g53190 | + | + |   | + |
| At5g53200 | + | + | + |   |
| At5g53220 | + | + | + |   |
| At5g53250 | + | + | + |   |
| At5g53280 | + | + | + |   |
| At5g53310 | + | + | + |   |
| At5g53330 | + | + | + |   |
| At5g53340 | + | + | + |   |
| At5g53350 | + | + | + |   |
| At5g53360 | + | + | + |   |
| At5g53370 | + | + | + |   |
| At5g53400 | + | + | + |   |
| At5g53420 | + | + | + |   |
| At5g53430 | + | + | + |   |
| At5g53440 | + | + | + |   |
| At5g53450 | + | + | + |   |
| At5g53460 | + | + | + |   |
| At5g53470 | + | + | + |   |
| At5g53480 | + | + | + |   |
| At5g53485 | + | + | + |   |
| At5g53490 | + | + | + |   |
| At5g53500 | + | + | + |   |
| At5g53510 | + |   |   |   |
| At5g53520 |   |   | + | + |
| At5g53530 | + | + | + |   |
| At5g53540 | + | + | + |   |
| At5g53550 | + | + | + |   |
| At5g53560 | + | + | + |   |
| At5g53570 | + | + | + |   |
| At5g53580 | + | + | + |   |

|           |   |   |   |   |
|-----------|---|---|---|---|
| At5g53590 | + | + | + |   |
| At5g53620 | + | + | + |   |
| At5g53650 | + | + | + |   |
| At5g53660 | + |   |   |   |
| At5g53710 | + |   |   | + |
| At5g53760 | + | + | + |   |
| At5g53800 | + | + | + |   |
| At5g53820 | + | + | + |   |
| At5g53830 |   | + | + |   |
| At5g53840 |   |   | + |   |
| At5g53850 | + | + | + |   |
| At5g53860 | + | + | + |   |
| At5g53870 | + | + | + |   |
| At5g53880 | + | + | + |   |
| At5g53890 | + | + | + |   |
| At5g53900 | + | + | + |   |
| At5g53940 | + | + | + |   |
| At5g53950 | + |   | + |   |
| At5g53970 | + | + | + |   |
| At5g54010 | + |   |   | + |
| At5g54060 |   | + | + |   |
| At5g54080 | + | + | + |   |
| At5g54090 | + | + | + |   |
| At5g54095 | + | + | + | + |
| At5g54100 | + | + | + |   |
| At5g54110 | + | + | + |   |
| At5g54120 | + | + | + |   |
| At5g54130 | + | + | + |   |
| At5g54140 | + | + | + |   |
| At5g54160 | + | + | + |   |
| At5g54170 | + | + | + |   |
| At5g54180 | + | + | + |   |
| At5g54190 |   |   | + |   |
| At5g54200 | + | + | + |   |
| At5g54220 |   |   | + | + |
| At5g54250 | + | + | + |   |
| At5g54260 | + |   | + |   |
| At5g54270 | + | + | + |   |
| At5g54280 | + | + | + |   |
| At5g54290 | + | + | + |   |
| At5g54300 | + | + | + |   |
| At5g54310 | + | + | + |   |
| At5g54380 | + | + | + |   |
| At5g54390 | + | + | + |   |
| At5g54400 | + | + | + |   |
| At5g54430 | + | + | + |   |
| At5g54440 | + | + | + |   |
| At5g54470 | + |   |   |   |
| At5g54490 | + |   |   |   |
| At5g54500 | + | + | + |   |
| At5g54510 | + | + | + |   |
| At5g54530 | + | + | + |   |

|           |   |   |   |   |
|-----------|---|---|---|---|
| At5g54540 | + | + | + |   |
| At5g54570 | + | + | + |   |
| At5g54580 | + | + | + |   |
| At5g54590 | + |   | + |   |
| At5g54600 | + | + | + |   |
| At5g54610 |   | + | + |   |
| At5g54630 | + | + | + |   |
| At5g54640 | + | + | + |   |
| At5g54650 | + | + | + |   |
| At5g54660 | + | + | + |   |
| At5g54670 | + | + | + |   |
| At5g54680 | + | + | + |   |
| At5g54690 | + | + | + |   |
| At5g54730 | + | + | + |   |
| At5g54750 | + | + | + |   |
| At5g54760 | + | + | + |   |
| At5g54770 | + | + | + |   |
| At5g54780 | + | + | + |   |
| At5g54800 | + | + | + |   |
| At5g54830 | + | + | + |   |
| At5g54840 | + | + | + |   |
| At5g54855 | + | + | + |   |
| At5g54860 | + | + | + |   |
| At5g54870 | + | + | + |   |
| At5g54880 | + | + | + |   |
| At5g54900 | + | + | + |   |
| At5g54910 | + | + | + |   |
| At5g54930 | + | + | + |   |
| At5g54940 | + | + | + |   |
| At5g54960 |   | + | + |   |
| At5g54970 | + | + | + |   |
| At5g54980 | + | + | + |   |
| At5g55000 | + | + | + |   |
| At5g55030 | + | + | + |   |
| At5g55040 |   |   | + | + |
| At5g55050 |   | + | + |   |
| At5g55060 | + | + | + |   |
| At5g55070 | + | + | + |   |
| At5g55080 |   |   | + |   |
| At5g55100 | + | + | + |   |
| At5g55120 | + | + | + |   |
| At5g55130 | + | + | + |   |
| At5g55140 | + | + | + |   |
| At5g55160 | + | + | + |   |
| At5g55180 | + | + | + |   |
| At5g55190 | + | + | + |   |
| At5g55200 | + | + | + |   |
| At5g55210 | + | + | + |   |
| At5g55220 | + | + | + |   |
| At5g55230 | + | + | + |   |
| At5g55250 | + | + | + |   |
| At5g55260 | + | + | + |   |



|           |   |   |   |   |
|-----------|---|---|---|---|
| At5g55280 | + | + | + |   |
| At5g55290 | + | + | + |   |
| At5g55300 | + | + | + |   |
| At5g55310 | + | + | + |   |
| At5g55320 |   |   | + |   |
| At5g55330 |   | + | + | + |
| At5g55360 | + |   |   |   |
| At5g55380 | + | + | + |   |
| At5g55390 | + | + | + |   |
| At5g55400 | + | + | + |   |
| At5g55450 | + | + | + |   |
| At5g55470 | + |   |   |   |
| At5g55480 | + | + | + |   |
| At5g55490 | + | + |   |   |
| At5g55500 | + | + | + |   |
| At5g55520 |   | + | + |   |
| At5g55530 | + | + | + |   |
| At5g55540 | + | + | + |   |
| At5g55550 | + | + | + |   |
| At5g55560 | + | + | + |   |
| At5g55570 | + | + | + |   |
| At5g55580 |   | + | + |   |
| At5g55590 | + |   |   |   |
| At5g55600 | + | + | + |   |
| At5g55610 | + | + | + |   |
| At5g55620 | + | + | + |   |
| At5g55630 | + | + | + |   |
| At5g55640 | + | + | + |   |
| At5g55660 | + | + | + |   |
| At5g55670 | + | + | + |   |
| At5g55700 | + | + | + |   |
| At5g55710 | + | + | + |   |
| At5g55720 | + |   | + | + |
| At5g55730 | + | + | + |   |
| At5g55740 | + | + | + |   |
| At5g55760 | + | + | + |   |
| At5g55820 | + | + | + |   |
| At5g55830 | + |   |   |   |
| At5g55840 | + | + | + |   |
| At5g55850 | + | + | + |   |
| At5g55860 | + | + | + |   |
| At5g55910 | + | + | + |   |
| At5g55915 | + | + | + |   |
| At5g55930 | + | + | + |   |
| At5g55940 | + | + | + |   |
| At5g55960 | + | + | + |   |
| At5g55970 | + | + |   |   |
| At5g55990 | + | + | + |   |
| At5g56000 | + | + | + |   |
| At5g56020 | + | + | + |   |
| At5g56030 | + | + | + |   |
| At5g56040 | + | + | + |   |

|           |   |   |   |   |
|-----------|---|---|---|---|
| At5g56090 | + | + | + |   |
| At5g56100 | + | + | + |   |
| At5g56110 | + |   |   |   |
| At5g56130 | + | + | + |   |
| At5g56140 | + | + | + |   |
| At5g56150 | + | + | + |   |
| At5g56160 | + | + |   |   |
| At5g56170 | + | + | + |   |
| At5g56180 | + | + | + |   |
| At5g56185 | + | + | + |   |
| At5g56190 | + | + | + |   |
| At5g56220 | + | + | + |   |
| At5g56230 |   | + | + |   |
| At5g56240 | + | + | + |   |
| At5g56250 | + | + | + |   |
| At5g56260 | + | + | + |   |
| At5g56270 | + | + | + |   |
| At5g56280 | + | + | + |   |
| At5g56290 | + | + | + |   |
| At5g56300 | + | + | + |   |
| At5g56340 | + | + | + |   |
| At5g56350 | + | + | + |   |
| At5g56360 | + | + | + |   |
| At5g56450 | + | + | + |   |
| At5g56460 | + | + | + |   |
| At5g56490 | + | + | + | + |
| At5g56500 | + | + | + |   |
| At5g56510 | + | + | + | + |
| At5g56540 | + | + | + |   |
| At5g56580 | + | + | + |   |
| At5g56590 | + | + | + |   |
| At5g56600 | + | + | + |   |
| At5g56610 | + | + | + |   |
| At5g56630 | + | + | + |   |
| At5g56640 | + | + |   | + |
| At5g56650 | + | + | + |   |
| At5g56670 | + | + | + |   |
| At5g56710 | + | + | + |   |
| At5g56720 |   |   | + |   |
| At5g56730 | + | + | + |   |
| At5g56740 | + | + | + |   |
| At5g56750 | + | + | + |   |
| At5g56760 | + | + | + |   |
| At5g56790 | + | + | + |   |
| At5g56850 | + | + | + |   |
| At5g56870 | + | + | + |   |
| At5g56900 | + | + | + |   |
| At5g56910 | + | + | + |   |
| At5g56940 | + | + | + |   |
| At5g56950 | + | + | + |   |
| At5g56970 | + |   | + |   |
| At5g56980 | + | + |   |   |

|           |   |   |   |   |
|-----------|---|---|---|---|
| At5g57000 | + | + | + |   |
| At5g57020 | + | + | + |   |
| At5g57030 | + | + | + |   |
| At5g57040 | + | + | + |   |
| At5g57060 | + | + | + |   |
| At5g57070 | + | + | + |   |
| At5g57080 | + | + |   |   |
| At5g57100 | + | + | + |   |
| At5g57110 | + | + | + |   |
| At5g57120 | + | + | + |   |
| At5g57130 | + | + | + |   |
| At5g57140 | + |   | + |   |
| At5g57150 | + | + | + |   |
| At5g57160 | + | + | + |   |
| At5g57170 | + | + | + |   |
| At5g57180 | + | + | + |   |
| At5g57190 | + | + |   |   |
| At5g57200 | + |   |   | + |
| At5g57230 | + | + | + |   |
| At5g57240 | + | + |   | + |
| At5g57250 | + | + | + |   |
| At5g57280 | + | + | + |   |
| At5g57290 | + | + | + |   |
| At5g57300 | + | + | + |   |
| At5g57320 | + | + | + | + |
| At5g57330 | + | + | + |   |
| At5g57340 |   | + |   |   |
| At5g57345 | + | + | + |   |
| At5g57350 | + | + | + |   |
| At5g57360 | + | + | + |   |
| At5g57370 | + | + | + |   |
| At5g57390 | + | + |   |   |
| At5g57440 | + | + | + |   |
| At5g57460 | + | + | + |   |
| At5g57490 | + | + | + |   |
| At5g57500 | + | + |   |   |
| At5g57520 | + | + | + | + |
| At5g57550 |   | + |   |   |
| At5g57560 | + | + | + |   |
| At5g57570 |   | + |   |   |
| At5g57580 | + | + | + |   |
| At5g57590 | + | + | + |   |
| At5g57610 | + | + | + |   |
| At5g57630 |   |   | + |   |
| At5g57655 | + | + | + |   |
| At5g57660 | + | + | + |   |
| At5g57670 | + |   |   | + |
| At5g57680 | + |   |   |   |
| At5g57690 | + | + |   |   |
| At5g57700 | + | + | + |   |
| At5g57710 | + | + | + |   |
| At5g57720 | + |   |   |   |

|           |   |   |   |   |
|-----------|---|---|---|---|
| At5g57740 | + | + | + |   |
| At5g57760 |   | + |   |   |
| At5g57780 | + | + | + |   |
| At5g57785 | + | + | + |   |
| At5g57800 | + | + | + |   |
| At5g57810 | + | + |   | + |
| At5g57815 | + | + | + |   |
| At5g57830 | + | + | + |   |
| At5g57850 | + | + | + |   |
| At5g57860 | + | + | + |   |
| At5g57870 | + | + | + |   |
| At5g57880 | + |   |   |   |
| At5g57900 | + | + | + |   |
| At5g57910 | + | + | + |   |
| At5g57920 |   |   | + |   |
| At5g57930 | + | + | + |   |
| At5g57940 | + | + | + |   |
| At5g57950 | + |   | + |   |
| At5g57960 | + | + | + |   |
| At5g57970 | + | + | + |   |
| At5g57990 | + | + | + |   |
| At5g58000 | + | + | + |   |
| At5g58020 | + | + | + |   |
| At5g58030 | + | + | + |   |
| At5g58040 | + | + | + |   |
| At5g58050 | + | + |   | + |
| At5g58060 | + | + | + |   |
| At5g58070 | + | + | + |   |
| At5g58090 | + | + | + |   |
| At5g58100 | + | + | + |   |
| At5g58110 | + | + | + |   |
| At5g58120 | + | + |   |   |
| At5g58130 | + | + | + |   |
| At5g58140 | + | + | + |   |
| At5g58160 | + |   |   |   |
| At5g58170 | + | + | + |   |
| At5g58190 | + | + | + |   |
| At5g58200 | + | + | + |   |
| At5g58210 | + | + | + |   |
| At5g58220 | + | + | + |   |
| At5g58230 | + | + | + |   |
| At5g58240 | + | + | + |   |
| At5g58250 | + | + | + |   |
| At5g58260 | + | + | + |   |
| At5g58270 | + | + | + |   |
| At5g58290 | + | + | + |   |
| At5g58300 | + | + | + |   |
| At5g58310 | + | + | + |   |
| At5g58330 | + | + | + |   |
| At5g58340 | + |   |   |   |
| At5g58350 | + | + | + |   |
| At5g58370 | + | + | + |   |

|           |   |   |   |   |
|-----------|---|---|---|---|
| At5g58375 | + | + | + |   |
| At5g58380 | + | + | + |   |
| At5g58390 | + |   |   |   |
| At5g58400 | + | + |   | + |
| At5g58410 | + | + | + |   |
| At5g58420 | + | + | + |   |
| At5g58430 | + | + | + |   |
| At5g58440 | + | + | + |   |
| At5g58450 | + | + | + |   |
| At5g58460 | + |   |   | + |
| At5g58470 | + | + | + |   |
| At5g58480 | + | + | + |   |
| At5g58490 | + | + | + |   |
| At5g58500 |   |   | + |   |
| At5g58510 | + | + | + |   |
| At5g58520 | + | + | + |   |
| At5g58530 | + | + | + |   |
| At5g58550 | + |   | + |   |
| At5g58560 | + | + | + |   |
| At5g58570 | + | + | + |   |
| At5g58575 | + | + | + |   |
| At5g58590 | + | + | + |   |
| At5g58600 | + | + | + |   |
| At5g58620 | + | + |   |   |
| At5g58630 |   |   | + |   |
| At5g58640 | + | + | + |   |
| At5g58650 | + | + | + |   |
| At5g58660 |   |   | + |   |
| At5g58690 | + | + | + |   |
| At5g58700 | + | + | + |   |
| At5g58710 | + | + | + |   |
| At5g58720 | + | + | + |   |
| At5g58730 | + | + | + |   |
| At5g58740 | + | + | + |   |
| At5g58760 | + | + | + |   |
| At5g58770 | + | + |   |   |
| At5g58782 |   | + | + | + |
| At5g58787 | + | + |   |   |
| At5g58790 | + | + | + |   |
| At5g58800 | + | + | + |   |
| At5g58830 |   | + | + | + |
| At5g58840 |   |   | + | + |
| At5g58870 | + | + | + |   |
| At5g58900 | + | + | + |   |
| At5g58920 | + | + | + |   |
| At5g58930 | + | + | + |   |
| At5g58950 | + | + | + |   |
| At5g58960 | + | + | + |   |
| At5g58970 | + | + | + |   |
| At5g58980 | + | + |   |   |
| At5g59000 | + | + | + |   |
| At5g59010 | + | + | + |   |

|           |   |   |   |   |
|-----------|---|---|---|---|
| At5g59020 | + | + |   |   |
| At5g59030 | + | + | + |   |
| At5g59040 | + |   |   | + |
| At5g59050 | + | + | + |   |
| At5g59080 | + | + |   |   |
| At5g59105 |   |   | + | + |
| At5g59120 | + | + | + | + |
| At5g59130 | + |   | + |   |
| At5g59140 | + | + | + |   |
| At5g59150 | + | + | + |   |
| At5g59160 | + | + | + |   |
| At5g59180 | + | + | + |   |
| At5g59210 | + | + | + |   |
| At5g59220 | + | + | + |   |
| At5g59240 | + | + | + |   |
| At5g59250 | + | + | + |   |
| At5g59290 | + | + | + |   |
| At5g59300 | + | + | + |   |
| At5g59310 | + | + | + |   |
| At5g59320 | + | + | + |   |
| At5g59330 |   | + | + | + |
| At5g59350 | + | + | + |   |
| At5g59360 |   |   | + |   |
| At5g59370 | + | + | + | + |
| At5g59380 | + | + | + |   |
| At5g59400 | + | + | + |   |
| At5g59410 | + | + | + |   |
| At5g59420 | + | + | + |   |
| At5g59430 | + | + | + |   |
| At5g59440 | + | + | + |   |
| At5g59450 | + | + | + |   |
| At5g59460 | + | + | + |   |
| At5g59480 | + | + | + |   |
| At5g59500 | + | + | + |   |
| At5g59520 | + |   |   |   |
| At5g59540 |   | + |   |   |
| At5g59550 | + | + | + |   |
| At5g59560 | + | + | + |   |
| At5g59590 | + |   |   | + |
| At5g59610 | + | + | + |   |
| At5g59650 | + | + | + |   |
| At5g59690 | + | + | + |   |
| At5g59700 | + |   |   |   |
| At5g59710 | + | + | + |   |
| At5g59730 | + | + | + |   |
| At5g59740 | + | + | + |   |
| At5g59750 | + | + | + |   |
| At5g59770 | + | + | + |   |
| At5g59780 | + | + |   |   |
| At5g59800 | + | + | + |   |
| At5g59810 | + | + | + |   |
| At5g59820 | + | + | + |   |

|           |   |   |   |   |
|-----------|---|---|---|---|
| At5g59830 | + | + | + |   |
| At5g59840 | + | + | + |   |
| At5g59845 | + | + | + |   |
| At5g59850 | + | + | + |   |
| At5g59870 | + | + | + |   |
| At5g59880 | + | + | + |   |
| At5g59890 | + | + | + |   |
| At5g59900 | + |   |   |   |
| At5g59910 | + | + | + |   |
| At5g59940 | + | + |   |   |
| At5g59950 | + | + | + |   |
| At5g59960 | + | + | + |   |
| At5g59980 | + | + | + |   |
| At5g60010 | + | + |   |   |
| At5g60020 | + | + | + |   |
| At5g60040 | + | + | + |   |
| At5g60090 | + |   |   | + |
| At5g60120 | + | + | + |   |
| At5g60140 | + | + | + | + |
| At5g60150 | + |   | + |   |
| At5g60160 | + | + | + |   |
| At5g60170 | + | + | + |   |
| At5g60190 | + |   |   |   |
| At5g60200 | + | + | + |   |
| At5g60210 | + | + | + |   |
| At5g60230 | + | + | + |   |
| At5g60250 | + |   |   |   |
| At5g60270 |   |   | + |   |
| At5g60360 | + | + | + |   |
| At5g60390 | + | + | + |   |
| At5g60400 | + | + | + |   |
| At5g60410 | + | + |   |   |
| At5g60420 | + | + | + |   |
| At5g60440 |   |   | + |   |
| At5g60450 | + | + | + |   |
| At5g60460 | + | + | + |   |
| At5g60490 | + | + | + |   |
| At5g60500 | + |   |   | + |
| At5g60540 | + | + | + |   |
| At5g60550 | + | + | + |   |
| At5g60570 | + | + | + |   |
| At5g60590 | + | + | + |   |
| At5g60600 | + | + | + |   |
| At5g60610 | + | + |   |   |
| At5g60620 | + | + | + |   |
| At5g60630 | + | + | + |   |
| At5g60640 | + | + | + |   |
| At5g60660 | + |   | + |   |
| At5g60670 | + | + | + |   |
| At5g60680 | + | + | + |   |
| At5g60690 | + | + | + |   |
| At5g60710 | + | + | + |   |

|           |   |   |   |   |
|-----------|---|---|---|---|
| At5g60720 | + | + | + |   |
| At5g60730 | + | + |   |   |
| At5g60740 | + | + | + |   |
| At5g60750 | + | + | + |   |
| At5g60760 | + |   |   |   |
| At5g60790 | + | + | + |   |
| At5g60800 | + |   |   |   |
| At5g60820 | + | + | + |   |
| At5g60840 | + |   |   |   |
| At5g60850 | + | + | + |   |
| At5g60860 | + | + | + |   |
| At5g60870 | + |   | + |   |
| At5g60900 |   | + |   |   |
| At5g60910 | + | + | + |   |
| At5g60920 | + | + | + |   |
| At5g60930 | + | + | + |   |
| At5g60940 | + | + | + |   |
| At5g60960 | + | + | + |   |
| At5g60970 |   | + |   |   |
| At5g60980 | + | + | + |   |
| At5g60990 | + | + | + |   |
| At5g61000 | + | + | + |   |
| At5g61010 |   | + | + |   |
| At5g61020 | + | + | + |   |
| At5g61030 | + | + | + |   |
| At5g61040 | + | + | + |   |
| At5g61060 | + | + | + |   |
| At5g61090 | + | + | + |   |
| At5g61120 | + | + | + | + |
| At5g61130 | + | + | + |   |
| At5g61140 | + | + | + |   |
| At5g61150 | + | + | + |   |
| At5g61170 | + | + | + |   |
| At5g61190 | + | + | + |   |
| At5g61210 | + | + | + |   |
| At5g61220 | + | + | + |   |
| At5g61230 | + | + | + |   |
| At5g61240 | + | + | + |   |
| At5g61290 |   |   | + |   |
| At5g61310 | + | + | + |   |
| At5g61320 | + |   |   | + |
| At5g61330 | + | + | + |   |
| At5g61340 | + | + |   |   |
| At5g61360 | + | + | + |   |
| At5g61370 | + |   | + |   |
| At5g61380 | + | + | + |   |
| At5g61410 | + | + | + |   |
| At5g61420 | + | + | + |   |
| At5g61430 | + | + |   |   |
| At5g61440 | + | + | + |   |
| At5g61450 | + | + |   |   |
| At5g61460 | + | + | + |   |



|           |   |   |   |   |
|-----------|---|---|---|---|
| At5g61480 | + | + | + |   |
| At5g61500 | + | + | + |   |
| At5g61510 | + | + | + |   |
| At5g61530 | + | + | + |   |
| At5g61540 | + | + | + |   |
| At5g61560 | + | + | + |   |
| At5g61570 | + |   | + |   |
| At5g61580 | + | + | + |   |
| At5g61590 | + | + | + |   |
| At5g61600 | + | + | + |   |
| At5g61605 | + |   |   | + |
| At5g61640 | + | + | + |   |
| At5g61660 | + | + | + |   |
| At5g61670 | + | + | + |   |
| At5g61700 | + |   |   |   |
| At5g61720 | + | + | + | + |
| At5g61730 | + | + | + |   |
| At5g61740 | + | + | + |   |
| At5g61760 | + | + | + |   |
| At5g61770 | + | + | + |   |
| At5g61780 | + | + | + |   |
| At5g61790 | + | + | + |   |
| At5g61810 | + | + | + |   |
| At5g61820 | + | + | + |   |
| At5g61830 | + | + | + |   |
| At5g61840 | + | + | + |   |
| At5g61880 | + | + | + |   |
| At5g61900 | + | + | + |   |
| At5g61910 | + | + | + |   |
| At5g61930 | + | + | + |   |
| At5g61940 | + |   |   | + |
| At5g61960 | + | + | + |   |
| At5g61970 | + | + | + |   |
| At5g61980 | + | + | + |   |
| At5g61990 | + |   | + |   |
| At5g62000 | + | + | + |   |
| At5g62010 | + | + | + |   |
| At5g62020 | + | + |   |   |
| At5g62030 | + | + | + |   |
| At5g62040 |   |   | + |   |
| At5g62050 | + | + | + |   |
| At5g62070 | + | + | + |   |
| At5g62080 | + |   |   |   |
| At5g62090 | + | + |   |   |
| At5g62100 |   | + |   |   |
| At5g62130 | + | + | + |   |
| At5g62140 | + | + | + |   |
| At5g62150 | + | + |   |   |
| At5g62160 | + | + |   |   |
| At5g62165 | + | + | + |   |
| At5g62170 |   | + | + |   |
| At5g62190 | + | + | + |   |

|           |   |   |   |   |
|-----------|---|---|---|---|
| At5g62200 | + | + | + |   |
| At5g62210 | + | + | + |   |
| At5g62220 | + | + | + |   |
| At5g62230 | + | + | + |   |
| At5g62260 | + | + | + |   |
| At5g62280 | + |   |   |   |
| At5g62290 | + | + | + |   |
| At5g62310 | + | + |   |   |
| At5g62350 | + | + | + |   |
| At5g62360 | + | + | + |   |
| At5g62390 | + | + | + |   |
| At5g62410 | + | + | + |   |
| At5g62430 | + | + | + |   |
| At5g62440 | + | + | + |   |
| At5g62450 | + | + | + |   |
| At5g62460 | + | + | + |   |
| At5g62470 | + | + | + |   |
| At5g62500 | + | + | + |   |
| At5g62520 | + |   |   |   |
| At5g62530 | + | + | + |   |
| At5g62540 | + | + | + |   |
| At5g62550 | + | + | + |   |
| At5g62570 | + | + | + |   |
| At5g62575 | + | + | + |   |
| At5g62580 | + | + | + |   |
| At5g62590 | + | + | + |   |
| At5g62610 | + | + | + |   |
| At5g62620 | + | + | + |   |
| At5g62640 | + | + | + |   |
| At5g62650 | + | + | + |   |
| At5g62670 | + | + | + |   |
| At5g62680 | + | + | + |   |
| At5g62690 | + | + | + |   |
| At5g62710 | + | + | + |   |
| At5g62720 | + | + | + |   |
| At5g62730 | + | + | + |   |
| At5g62740 | + | + | + |   |
| At5g62750 | + | + | + | + |
| At5g62760 | + |   | + |   |
| At5g62770 |   | + |   |   |
| At5g62790 | + | + | + |   |
| At5g62810 | + | + | + |   |
| At5g62840 | + | + | + |   |
| At5g62850 | + |   |   | + |
| At5g62860 | + |   |   |   |
| At5g62880 | + | + | + |   |
| At5g62890 | + | + | + |   |
| At5g62900 | + | + | + |   |
| At5g62910 | + | + | + |   |
| At5g62920 | + |   | + |   |
| At5g62930 | + | + | + |   |
| At5g62940 | + |   | + |   |

|           |   |   |   |   |
|-----------|---|---|---|---|
| At5g62950 | + | + | + |   |
| At5g62960 | + | + | + |   |
| At5g62980 | + | + | + |   |
| At5g63000 | + | + | + |   |
| At5g63010 | + | + | + |   |
| At5g63030 | + | + | + |   |
| At5g63040 |   | + | + |   |
| At5g63050 | + | + | + |   |
| At5g63060 | + | + | + |   |
| At5g63070 | + |   |   | + |
| At5g63080 | + | + | + |   |
| At5g63100 | + |   | + |   |
| At5g63110 | + | + | + |   |
| At5g63120 | + | + | + |   |
| At5g63130 | + |   |   |   |
| At5g63135 | + | + | + |   |
| At5g63140 | + | + | + |   |
| At5g63150 | + | + | + |   |
| At5g63180 | + | + | + |   |
| At5g63190 | + | + | + |   |
| At5g63200 | + |   | + |   |
| At5g63210 | + | + | + |   |
| At5g63220 | + | + | + |   |
| At5g63260 | + | + | + |   |
| At5g63280 | + | + |   |   |
| At5g63290 | + | + |   |   |
| At5g63310 | + | + | + |   |
| At5g63320 | + | + | + |   |
| At5g63330 | + | + | + |   |
| At5g63370 | + | + | + |   |
| At5g63380 | + | + | + |   |
| At5g63400 | + | + | + |   |
| At5g63410 | + | + | + |   |
| At5g63420 | + | + | + |   |
| At5g63430 | + | + | + |   |
| At5g63440 | + | + | + |   |
| At5g63450 |   | + |   |   |
| At5g63460 | + |   |   |   |
| At5g63470 | + | + | + |   |
| At5g63480 | + | + |   |   |
| At5g63490 | + | + | + |   |
| At5g63510 | + | + | + |   |
| At5g63520 | + | + | + |   |
| At5g63530 | + | + | + |   |
| At5g63570 | + | + | + |   |
| At5g63580 |   |   | + |   |
| At5g63610 | + | + | + |   |
| At5g63620 | + | + | + |   |
| At5g63630 | + | + | + |   |
| At5g63640 | + | + | + |   |
| At5g63650 | + | + | + |   |
| At5g63670 | + | + | + |   |

|           |   |   |   |   |
|-----------|---|---|---|---|
| At5g63680 | + | + | + |   |
| At5g63700 | + | + | + |   |
| At5g63710 | + | + | + |   |
| At5g63750 | + |   |   | + |
| At5g63760 | + | + | + |   |
| At5g63770 | + | + | + |   |
| At5g63780 | + | + | + |   |
| At5g63790 |   | + | + |   |
| At5g63800 | + | + | + |   |
| At5g63810 | + | + | + |   |
| At5g63830 | + | + | + |   |
| At5g63840 | + | + | + |   |
| At5g63850 | + | + | + |   |
| At5g63860 | + | + | + |   |
| At5g63870 | + | + | + |   |
| At5g63880 | + | + | + |   |
| At5g63890 | + | + | + |   |
| At5g63900 |   |   | + |   |
| At5g63905 | + | + | + |   |
| At5g63910 | + | + | + |   |
| At5g63920 | + | + | + |   |
| At5g63930 | + | + | + |   |
| At5g63940 | + | + | + |   |
| At5g63950 | + | + | + |   |
| At5g63960 | + | + | + |   |
| At5g63970 |   | + | + |   |
| At5g63980 | + | + | + |   |
| At5g63990 | + | + | + |   |
| At5g64010 | + | + | + |   |
| At5g64030 | + | + | + |   |
| At5g64040 | + | + | + |   |
| At5g64050 | + | + | + |   |
| At5g64060 | + | + | + | + |
| At5g64070 | + | + | + |   |
| At5g64080 | + | + | + |   |
| At5g64090 | + | + | + |   |
| At5g64120 |   | + | + |   |
| At5g64130 | + | + | + |   |
| At5g64140 | + | + | + |   |
| At5g64150 | + | + | + |   |
| At5g64160 | + | + | + |   |
| At5g64170 | + | + | + |   |
| At5g64180 | + | + | + |   |
| At5g64200 | + | + | + |   |
| At5g64220 | + | + | + |   |
| At5g64230 |   | + | + | + |
| At5g64240 | + | + | + |   |
| At5g64250 | + | + | + |   |
| At5g64260 | + | + | + |   |
| At5g64270 | + | + | + |   |
| At5g64280 | + | + | + |   |
| At5g64290 | + | + | + |   |

|           |   |   |   |   |
|-----------|---|---|---|---|
| At5g64300 | + | + | + |   |
| At5g64310 | + | + | + |   |
| At5g64330 | + | + | + |   |
| At5g64340 | + | + | + |   |
| At5g64350 | + | + | + |   |
| At5g64360 | + | + | + |   |
| At5g64370 | + | + | + |   |
| At5g64380 | + | + | + |   |
| At5g64390 | + | + | + |   |
| At5g64400 | + | + | + |   |
| At5g64410 | + | + | + |   |
| At5g64420 | + | + | + |   |
| At5g64440 | + | + | + |   |
| At5g64460 | + | + | + |   |
| At5g64470 | + | + | + |   |
| At5g64480 | + | + | + |   |
| At5g64500 | + | + | + |   |
| At5g64510 | + | + | + |   |
| At5g64550 | + | + | + |   |
| At5g64560 | + | + | + |   |
| At5g64570 | + | + | + |   |
| At5g64580 | + | + | + |   |
| At5g64600 | + | + | + |   |
| At5g64610 | + | + | + |   |
| At5g64620 | + | + | + |   |
| At5g64630 | + | + | + |   |
| At5g64640 | + | + | + |   |
| At5g64650 | + | + | + |   |
| At5g64660 | + | + | + |   |
| At5g64670 | + | + | + |   |
| At5g64680 | + | + | + |   |
| At5g64690 | + |   |   |   |
| At5g64700 | + |   | + |   |
| At5g64730 | + | + | + |   |
| At5g64740 | + | + | + |   |
| At5g64760 | + | + | + |   |
| At5g64780 | + | + | + |   |
| At5g64790 | + | + |   | + |
| At5g64813 | + | + | + |   |
| At5g64816 | + | + | + |   |
| At5g64830 | + | + | + |   |
| At5g64840 | + | + | + |   |
| At5g64850 | + | + | + |   |
| At5g64860 | + | + | + |   |
| At5g64870 | + | + | + | + |
| At5g64880 | + | + | + |   |
| At5g64900 | + | + | + |   |
| At5g64920 | + | + | + |   |
| At5g64930 | + | + | + |   |
| At5g64940 | + | + | + |   |
| At5g64950 | + | + | + |   |
| At5g64960 | + | + | + |   |

|           |   |   |   |   |
|-----------|---|---|---|---|
| At5g64970 | + | + | + |   |
| At5g64980 | + | + | + |   |
| At5g64990 | + | + | + |   |
| At5g65000 | + | + | + |   |
| At5g65010 | + | + | + |   |
| At5g65020 | + | + | + |   |
| At5g65040 | + |   | + |   |
| At5g65050 | + | + |   |   |
| At5g65080 | + |   |   |   |
| At5g65090 | + | + |   |   |
| At5g65110 | + | + | + |   |
| At5g65120 | + | + | + |   |
| At5g65140 | + | + | + |   |
| At5g65180 | + | + | + |   |
| At5g65205 | + |   |   | + |
| At5g65210 |   | + |   |   |
| At5g65220 | + | + | + |   |
| At5g65240 | + | + | + |   |
| At5g65250 | + | + | + |   |
| At5g65260 | + | + | + |   |
| At5g65270 | + | + | + |   |
| At5g65280 | + | + | + |   |
| At5g65290 | + | + | + |   |
| At5g65300 | + |   | + |   |
| At5g65310 | + | + | + |   |
| At5g65360 | + | + | + |   |
| At5g65380 | + | + | + |   |
| At5g65390 | + | + | + |   |
| At5g65420 | + | + | + |   |
| At5g65430 | + | + | + |   |
| At5g65440 | + | + | + |   |
| At5g65450 | + | + | + |   |
| At5g65460 | + | + | + |   |
| At5g65470 | + | + | + |   |
| At5g65480 | + | + | + |   |
| At5g65490 | + | + | + |   |
| At5g65520 | + | + | + |   |
| At5g65530 | + | + | + |   |
| At5g65540 | + | + | + |   |
| At5g65560 | + | + | + |   |
| At5g65620 | + | + | + |   |
| At5g65630 | + | + | + |   |
| At5g65640 | + | + | + |   |
| At5g65650 | + | + | + |   |
| At5g65660 | + | + | + |   |
| At5g65670 | + | + | + |   |
| At5g65685 | + | + | + |   |
| At5g65700 | + | + | + |   |
| At5g65710 | + | + | + |   |
| At5g65720 | + | + | + |   |
| At5g65730 | + | + | + |   |
| At5g65750 | + | + | + |   |

|           |   |   |   |
|-----------|---|---|---|
| At5g65760 | + | + | + |
| At5g65770 | + | + | + |
| At5g65780 | + | + | + |
| At5g65810 | + | + | + |
| At5g65830 | + | + | + |
| At5g65840 | + | + | + |
| At5g65860 | + | + | + |
| At5g65870 | + | + | + |
| At5g65880 | + | + | + |
| At5g65890 | + | + | + |
| At5g65900 | + | + | + |
| At5g65910 | + | + | + |
| At5g65930 | + | + | + |
| At5g65940 | + | + | + |
| At5g65950 | + | + | + |
| At5g65960 | + | + | + |
| At5g65990 | + | + | + |
| At5g66000 |   |   | + |
| At5g66010 | + | + | + |
| At5g66020 | + |   | + |
| At5g66030 | + | + | + |
| At5g66040 | + | + | + |
| At5g66050 | + | + | + |
| At5g66055 | + | + | + |
| At5g66060 |   |   | + |
| At5g66070 | + | + | + |
| At5g66080 | + | + | + |
| At5g66090 | + | + | + |
| At5g66120 | + | + | + |
| At5g66130 | + | + | + |
| At5g66140 | + | + | + |
| At5g66150 | + |   |   |
| At5g66160 | + | + | + |
| At5g66170 | + | + | + |
| At5g66180 | + | + | + |
| At5g66190 | + | + | + |
| At5g66200 | + | + | + |
| At5g66210 | + | + | + |
| At5g66230 | + | + | + |
| At5g66240 | + | + | + |
| At5g66250 | + | + | + |
| At5g66260 |   | + |   |
| At5g66310 | + | + | + |
| At5g66320 | + | + | + |
| At5g66330 | + | + | + |
| At5g66360 | + | + | + |
| At5g66380 | + | + | + |
| At5g66400 | + |   |   |
| At5g66410 | + | + | + |
| At5g66420 | + | + | + |
| At5g66440 | + | + | + |
| At5g66460 | + | + | + |

|           |   |   |   |   |
|-----------|---|---|---|---|
| At5g66470 | + | + | + |   |
| At5g66490 | + | + | + |   |
| At5g66510 | + | + | + |   |
| At5g66520 | + |   | + |   |
| At5g66530 | + | + | + |   |
| At5g66540 | + | + | + |   |
| At5g66550 | + |   | + |   |
| At5g66560 | + | + | + |   |
| At5g66570 | + | + | + |   |
| At5g66590 | + | + | + |   |
| At5g66620 | + |   | + |   |
| At5g66650 | + |   |   |   |
| At5g66680 | + | + | + |   |
| At5g66700 | + |   | + |   |
| At5g66710 | + |   |   |   |
| At5g66730 | + | + | + |   |
| At5g66740 | + | + |   | + |
| At5g66750 | + | + | + |   |
| At5g66760 | + | + | + |   |
| At5g66770 | + | + | + |   |
| At5g66800 | + | + | + |   |
| At5g66810 | + | + | + |   |
| At5g66820 | + | + | + |   |
| At5g66850 | + | + | + |   |
| At5g66880 | + | + | + |   |
| At5g66890 |   |   | + |   |
| At5g66900 | + | + | + |   |
| At5g66920 | + | + | + |   |
| At5g66930 | + | + | + |   |
| At5g66940 | + | + |   |   |
| At5g66950 | + | + | + |   |
| At5g66960 | + | + | + |   |
| At5g67020 |   | + |   |   |
| At5g67030 | + | + | + |   |
| At5g67060 | + |   |   |   |
| At5g67070 | + | + | + |   |
| At5g67090 |   |   | + |   |
| At5g67100 | + | + | + |   |
| At5g67110 | + | + | + |   |
| At5g67130 | + | + | + |   |
| At5g67150 | + | + | + |   |
| At5g67160 | + | + | + |   |
| At5g67180 | + | + | + |   |
| At5g67200 | + | + | + |   |
| At5g67210 | + | + | + |   |
| At5g67220 | + | + | + |   |
| At5g67230 | + | + | + |   |
| At5g67240 | + | + | + |   |
| At5g67250 | + | + | + |   |
| At5g67260 | + | + | + |   |
| At5g67270 | + | + | + |   |
| At5g67280 | + | + | + |   |



|           |   |   |   |
|-----------|---|---|---|
| At5g67290 | + | + | + |
| At5g67300 | + | + | + |
| At5g67320 | + | + | + |
| At5g67330 | + | + | + |
| At5g67340 |   | + |   |
| At5g67350 | + | + | + |
| At5g67360 | + | + | + |
| At5g67370 | + | + | + |
| At5g67380 | + | + | + |
| At5g67420 | + | + | + |
| At5g67440 | + | + | + |
| At5g67460 | + | + | + |
| At5g67470 | + | + | + |
| At5g67480 | + | + | + |
| At5g67490 | + | + | + |
| At5g67500 | + | + | + |
| At5g67510 | + | + | + |
| At5g67520 | + | + | + |
| At5g67530 | + | + | + |
| At5g67560 | + | + | + |
| At5g67570 | + | + |   |
| At5g67580 | + | + | + |
| At5g67590 | + | + | + |
| At5g67600 | + | + | + |
| At5g67630 | + | + | + |
| AtMg00170 | + | + |   |
| AtMg00220 |   | + |   |
| AtMg00290 | + | + | + |
| AtMg00410 | + | + | + |
| AtMg00480 | + | + | + |
| AtMg00560 | + | + | + |
| AtMg00610 | + | + | + |
| AtMg00730 | + | + | + |
| AtMg01190 | + | + | + |
| AtMg01280 |   |   | + |

**Table S2. Genes specific to flowers.**

| <b>Probe set</b> | <b>Gene</b> | <b>Model</b> | <b>Annotation</b>                                                     |
|------------------|-------------|--------------|-----------------------------------------------------------------------|
| 249351_at        | At5g40440   | 1            | MAP kinase kinase 3 (ATMKK3)                                          |
| 259656_at        | At1g55200   | 1            | protein kinase, putative                                              |
| 266908_at        | At2g34650   | 1            | putative protein kinase                                               |
| 265268_at        | At2g42960   | 1            | putative protein kinase                                               |
| 250616_at        | At5g07280   | 1            | receptor-like protein kinase-like protein                             |
| 257870_at        | At3g28490   | 1            | 2-oxoglutarate-dependent dioxygenase family                           |
| 263907_at        | At2g36270   | 1            | ABA-responsive element binding protein, putative                      |
| 248277_at        | At5g52860   | 1            | ABC transporter family protein                                        |
| 247344_at        | At5g63750   | 1            | ARI-like RING zinc finger protein-like                                |
| 253788_at        | At4g28680   | 1            | aromatic amino-acid decarboxylase - like protein                      |
| 246282_at        | At4g36580   | 1            | ATPase-like protein                                                   |
| 246544_at        | At5g15100   | 1            | auxin transport protein - like                                        |
| 250286_at        | At5g13320   | 1            | auxin-responsive - like protein                                       |
| 260483_at        | At1g11000   | 1            | Barley Mlo protein isolog                                             |
| 258306_at        | At3g30530   | 1            | bZIP family transcription factor                                      |
| 260136_at        | At1g66360   | 1            | C2 domain-containing protein                                          |
| 256031_at        | At1g34100   | 1            | choline kinase (GmCK2p), putative                                     |
| 264310_at        | At1g62030   | 1            | CHP-rich zinc finger protein, putative                                |
| 251728_at        | At3g56300   | 1            | cysteine-tRNA ligase-like protein                                     |
| 266921_at        | At2g45970   | 1            | cytochrome P450, putative                                             |
| 245437_at        | At4g16630   | 1            | DEAD/DEAH box RNA helicase, putative                                  |
| 245719_at        | At5g04110   | 1            | DNA gyrase subunit B - like protein                                   |
| 256830_at        | At3g22860   | 1            | eukaryotic translation initiation factor 3 (subunit 8)                |
| 264606_at        | At1g04660   | 1            | expressed protein                                                     |
| 255768_at        | At1g16705   | 1            | Expressed protein                                                     |
| 246581_at        | At1g31760   | 1            | expressed protein                                                     |
| 262726_at        | At1g43640   | 1            | expressed protein                                                     |
| 259662_at        | At1g55255   | 1            | Expressed protein                                                     |
| 256363_at        | At1g66510   | 1            | expressed protein                                                     |
| 259956_at        | At1g75110   | 1            | expressed protein                                                     |
| 264094_at        | At1g79200   | 1            | expressed protein                                                     |
| 265997_at        | At2g24250   | 1            | Expressed protein                                                     |
| 263474_at        | At2g31725   | 1            | expressed protein                                                     |
| 257136_at        | At3g12890   | 1            | expressed protein                                                     |
| 257845_at        | At3g28430   | 1            | expressed protein                                                     |
| 255480_at        | At4g02485   | 1            | expressed protein                                                     |
| 262989_at        | At1g23420   | 1            | F28C11.5                                                              |
| 249405_at        | At5g40280   | 1            | farnesyltransferase beta subunit (ERA1) (protein farnesyltransferase) |
| 259124_at        | At3g02310   | 1            | floral homeotic protein AGL4                                          |
| 250258_at        | At5g13790   | 1            | floral homeotic protein, AGL15                                        |
| 253623_at        | At4g30570   | 1            | GDP-mannose pyrophosphorylase like protein                            |
| 260023_at        | At1g30040   | 1            | gibberellin 2-oxidase (GA2-oxidase) (ga2ox2)                          |
| 251197_at        | At3g62960   | 1            | glutaredoxin -like protein                                            |
| 260632_at        | At1g62360   | 1            | homeobox protein, putative                                            |
| 245585_at        | At4g14970   | 1            | hypothetical                                                          |
| 261575_at        | At1g01130   | 1            | hypothetical protein                                                  |
| 264830_at        | At1g03710   | 1            | hypothetical protein                                                  |
| 265082_at        | At1g03830   | 1            | hypothetical protein                                                  |

|             |           |   |                                               |
|-------------|-----------|---|-----------------------------------------------|
| 260945_at   | At1g05950 | 1 | hypothetical protein                          |
| 259394_at   | At1g06420 | 1 | hypothetical protein                          |
| 260654_at   | At1g19290 | 1 | hypothetical protein                          |
| 261000_at   | At1g26540 | 1 | hypothetical protein                          |
| 264267_at   | At1g60210 | 1 | hypothetical protein                          |
| 264426_at   | At1g61760 | 1 | hypothetical protein                          |
| 262640_at   | At1g62763 | 1 | hypothetical protein                          |
| 262925_at   | At1g65730 | 1 | hypothetical protein                          |
| 261917_at   | At1g65920 | 1 | hypothetical protein                          |
| 264478_at   | At1g77270 | 1 | hypothetical protein                          |
| 263741_at   | At2g20620 | 1 | hypothetical protein                          |
| 265430_at   | At2g20700 | 1 | hypothetical protein                          |
| 265428_at   | At2g20720 | 1 | hypothetical protein                          |
| 265420_s_at | At2g21030 | 1 | hypothetical protein                          |
| 265609_at   | At2g25420 | 1 | hypothetical protein                          |
| 266540_at   | At2g35310 | 1 | hypothetical protein                          |
| 266970_at   | At2g39560 | 1 | hypothetical protein                          |
| 245109_at   | At2g41520 | 1 | hypothetical protein                          |
| 245110_at   | At2g41550 | 1 | hypothetical protein                          |
| 263974_at   | At2g42720 | 1 | hypothetical protein                          |
| 259089_at   | At3g04960 | 1 | hypothetical protein                          |
| 256418_at   | At3g06160 | 1 | hypothetical protein                          |
| 257579_at   | At3g11000 | 1 | hypothetical protein                          |
| 258781_at   | At3g11740 | 1 | hypothetical protein                          |
| 256285_at   | At3g12510 | 1 | hypothetical protein                          |
| 256957_at   | At3g13420 | 1 | hypothetical protein                          |
| 257878_at   | At3g17150 | 1 | hypothetical protein                          |
| 257248_at   | At3g24150 | 1 | hypothetical protein                          |
| 252288_at   | At3g49090 | 1 | hypothetical protein                          |
| 245515_at   | At4g15810 | 1 | hypothetical protein                          |
| 253363_at   | At4g33130 | 1 | hypothetical protein                          |
| 259087_at   | At3g04980 | 1 | hypothetical protein, contains DnaJ motif     |
| 254400_at   | At4g21270 | 1 | kinesin-like protein A (katA)                 |
| 250685_at   | At5g06670 | 1 | kinesin-related protein                       |
| 257483_at   | At1g49620 | 1 | Kip-related protein 7                         |
| 245571_at   | At4g14695 | 1 | light induced protein like                    |
| 258741_at   | At3g05790 | 1 | Lon protease, putative                        |
| 246531_at   | At5g15800 | 1 | MADS-box protein AGL2                         |
| 260461_at   | At1g10980 | 1 | membrane protein PTM1 precursor isolog        |
| 255081_at   | At4g09140 | 1 | MLH1 protein                                  |
| 251223_at   | At3g62610 | 1 | myb family transcription factor               |
| 250386_at   | At5g11510 | 1 | MYB like protein                              |
| 255409_at   | At4g03090 | 1 | NDX1 homeobox protein homolog                 |
| 264973_at   | At1g27040 | 1 | nitrate transporter, putative                 |
| 247208_at   | At5g64870 | 1 | nodulin-like                                  |
| 248660_at   | At5g48650 | 1 | NTF2-containing RNA-binding protein, putative |
| 262124_at   | At1g59660 | 1 | nucleoporin 98-like protein                   |
| 251979_at   | At3g53140 | 1 | O-diphenol-O-methyl transferase, putative     |
| 258240_at   | At3g27660 | 1 | oleosin                                       |
| 253370_at   | At4g33230 | 1 | pectinesterase family                         |
| 247857_at   | At5g58400 | 1 | peroxidase, putative                          |
| 249275_at   | At5g41870 | 1 | polygalacturonase, putative                   |

|             |           |   |                                                    |
|-------------|-----------|---|----------------------------------------------------|
| 254373_at   | At4g21730 | 1 | pseudogene, expressed protein                      |
| 248022_at   | At5g56510 | 1 | pumilio-family RNA-binding protein, putative       |
| 265318_at   | At2g22650 | 1 | putative D-amino acid dehydrogenase                |
| 263963_at   | At2g36080 | 1 | putative DNA-binding protein RAV2                  |
| 263231_at   | At1g05680 | 1 | putative indole-3-acetate beta-glucosyltransferase |
| 262654_at   | At1g14180 | 1 | putative mandelonitrile lyase                      |
| 267576_at   | At2g30640 | 1 | putative Mutator-like transposase                  |
| 245162_at   | At2g33240 | 1 | putative myosin heavy chain                        |
| 262773_at   | At1g13220 | 1 | putative nuclear matrix constituent protein        |
| 252495_at   | At3g46770 | 1 | putative protein                                   |
| 252227_at   | At3g49900 | 1 | putative protein                                   |
| 252129_at   | At3g50890 | 1 | putative protein                                   |
| 252088_at   | At3g52100 | 1 | putative protein                                   |
| 251844_at   | At3g54630 | 1 | putative protein                                   |
| 251576_at   | At3g58200 | 1 | putative protein                                   |
| 251521_at   | At3g59420 | 1 | putative protein                                   |
| 254704_at   | At4g18020 | 1 | putative protein                                   |
| 254203_at   | At4g24150 | 1 | putative protein                                   |
| 254142_at   | At4g24630 | 1 | putative protein                                   |
| 253887_at   | At4g27730 | 1 | putative protein                                   |
| 253488_at   | At4g31610 | 1 | putative protein                                   |
| 253168_at   | At4g35070 | 1 | putative protein                                   |
| 253085_s_at | At4g36270 | 1 | putative protein                                   |
| 251111_at   | At5g01310 | 1 | putative protein                                   |
| 251025_at   | At5g02190 | 1 | putative protein                                   |
| 250920_at   | At5g03390 | 1 | putative protein                                   |
| 250847_at   | At5g04480 | 1 | putative protein                                   |
| 250492_at   | At5g09790 | 1 | putative protein                                   |
| 250504_at   | At5g09840 | 1 | putative protein                                   |
| 250359_at   | At5g11350 | 1 | putative protein                                   |
| 250078_at   | At5g16690 | 1 | putative protein                                   |
| 250071_at   | At5g18000 | 1 | putative protein                                   |
| 250004_at   | At5g18750 | 1 | putative protein                                   |
| 246889_at   | At5g25470 | 1 | putative protein                                   |
| 246898_at   | At5g25580 | 1 | putative protein                                   |
| 249692_s_at | At5g36670 | 1 | putative protein                                   |
| 249621_at   | At5g37530 | 1 | putative protein                                   |
| 249418_at   | At5g39780 | 1 | putative protein                                   |
| 249003_at   | At5g44500 | 1 | putative protein                                   |
| 248948_at   | At5g45560 | 1 | putative protein                                   |
| 248830_at   | At5g47150 | 1 | putative protein                                   |
| 248372_at   | At5g51850 | 1 | putative protein                                   |
| 248143_at   | At5g55040 | 1 | putative protein                                   |
| 247562_at   | At5g61120 | 1 | putative protein                                   |
| 247317_at   | At5g64060 | 1 | putative protein                                   |
| 249426_at   | At5g39840 | 1 | putative RNA helicase                              |
| 267639_at   | At2g42200 | 1 | putative squamosa-promoter binding protein         |
| 264444_at   | At1g27360 | 1 | putative squamosa-promoter binding protein 2       |
| 265905_at   | At2g25640 | 1 | putative transcription elongation factor S-II      |
| 248693_at   | At5g48330 | 1 | regulator of chromosome condensation like          |
| 261306_at   | At1g48610 | 1 | regulatory protein HAL3B                           |
| 261100_at   | At1g63020 | 1 | RNA polymerase IIA large subunit, putative         |

|             |           |   |                                                            |
|-------------|-----------|---|------------------------------------------------------------|
| 256780_at   | At3g13640 | 1 | RNase L inhibitor protein, putative                        |
| 266539_at   | At2g35160 | 1 | similar to mammalian MHC III region protein G9a            |
| 260335_at   | At1g74000 | 1 | strictosidine synthase family                              |
| 251021_at   | At5g02140 | 1 | thaumatin-like protein                                     |
| 261168_at   | At1g04940 | 1 | unknown protein                                            |
| 259461_at   | At1g18900 | 1 | unknown protein                                            |
| 256175_at   | At1g51670 | 1 | unknown protein                                            |
| 264483_at   | At1g77230 | 1 | unknown protein                                            |
| 261889_at   | At1g80810 | 1 | unknown protein                                            |
| 267284_at   | At2g23700 | 1 | unknown protein                                            |
| 266562_at   | At2g23970 | 1 | unknown protein                                            |
| 266987_at   | At2g39280 | 1 | unknown protein                                            |
| 252320_at   | At3g48580 | 1 | xyloglucan endotransglycosylase, putative                  |
| 246025_at   | At5g21150 | 1 | zwille/pinhead-like protein                                |
| 252450_s_at | At3g47090 | 2 | leucine-rich repeat transmembrane protein kinase, putative |
| 259439_at   | At1g01480 | 2 | 1-aminocyclopropane-1-carboxylate synthase (ACC synthase)  |
| 251448_at   | At3g59845 | 2 | allyl alcohol dehydrogenase-like protein                   |
| 254336_at   | At4g22050 | 2 | aspartic proteinase like protein                           |
| 260242_at   | At1g63650 | 2 | bHLH protein                                               |
| 255644_at   | At4g00870 | 2 | bHLH protein                                               |
| 249207_at   | At5g42640 | 2 | C2H2-type zinc finger protein-like                         |
| 265020_at   | At1g24540 | 2 | cytochrome P450, putative                                  |
| 253461_at   | At4g32170 | 2 | cytochrome P450, putative                                  |
| 267554_at   | At2g32790 | 2 | E2, ubiquitin-conjugating enzyme, putative                 |
| 264363_at   | At1g03170 | 2 | expressed protein                                          |
| 260942_s_at | At1g45190 | 2 | expressed protein                                          |
| 262290_at   | At1g70985 | 2 | Expressed protein                                          |
| 263518_at   | At2g21655 | 2 | Expressed protein                                          |
| 255823_at   | At2g40470 | 2 | expressed protein                                          |
| 259107_at   | At3g05460 | 2 | expressed protein                                          |
| 249757_at   | At5g24316 | 2 | Expressed protein                                          |
| 246641_s_at | At5g34885 | 2 | Expressed protein                                          |
| 249402_at   | At5g40155 | 2 | Expressed protein                                          |
| 248887_at   | At5g46115 | 2 | Expressed protein                                          |
| 247287_at   | At5g64230 | 2 | expressed protein                                          |
| 255073_at   | At4g09090 | 2 | glycosyl hydrolase family 17                               |
| 250499_at   | At5g09730 | 2 | glycosyl hydrolase family 3                                |
| 265091_s_at | At1g03940 | 2 | hypothetical protein                                       |
| 256109_at   | At1g16950 | 2 | hypothetical protein                                       |
| 261001_at   | At1g26530 | 2 | hypothetical protein                                       |
| 257468_at   | At1g47470 | 2 | hypothetical protein                                       |
| 260319_at   | At1g63950 | 2 | hypothetical protein                                       |
| 264341_at   | At1g70270 | 2 | hypothetical protein                                       |
| 261533_at   | At1g71690 | 2 | hypothetical protein                                       |
| 251606_at   | At3g57840 | 2 | hypothetical protein                                       |
| 253984_at   | At4g26590 | 2 | isp4 like protein                                          |
| 260333_at   | At1g70500 | 2 | polygalacturonase, putative                                |
| 257077_at   | At3g19690 | 2 | PR-1 protein, putative                                     |
| 255804_at   | At4g10220 | 2 | putative protein                                           |
| 254777_at   | At4g12960 | 2 | putative protein                                           |
| 254186_at   | At4g24010 | 2 | putative protein                                           |
| 250894_s_at | At5g03810 | 2 | putative protein                                           |

|             |           |   |                                                                    |
|-------------|-----------|---|--------------------------------------------------------------------|
| 250325_s_at | At5g12060 | 2 | putative protein                                                   |
| 246684_at   | At5g33340 | 2 | putative protein                                                   |
| 249614_at   | At5g37300 | 2 | putative protein                                                   |
| 249578_at   | At5g37730 | 2 | putative protein                                                   |
| 247713_at   | At5g59330 | 2 | putative protein                                                   |
| 260170_at   | At1g71890 | 2 | putative sucrose transport protein                                 |
| 253632_at   | At4g30430 | 2 | senescence-associated protein homolog                              |
| 248918_at   | At5g45890 | 2 | senescence-specific cysteine protease SAG12                        |
| 249241_at   | At5g42230 | 2 | serine carboxypeptidase-II like                                    |
| 247798_at   | At5g58830 | 2 | subtilisin-like serine protease                                    |
| 250716_at   | At5g06170 | 2 | sucrose transporter protein                                        |
| 258130_at   | At3g24510 | 2 | unknown protein                                                    |
| 248930_at   | At5g46010 | 2 | unknown protein                                                    |
| 257130_at   | At3g20210 | 2 | vacuolar processing enzyme/asparaginyl endopeptidase, putative     |
| 248111_at   | At5g55330 | 2 | wax synthase-like protein                                          |
| 250473_at   | At5g10220 | 3 | annexin -like protein                                              |
| 246939_at   | At5g25390 | 3 | AP2 domain containing protein                                      |
| 261137_at   | At1g19830 | 3 | auxin-induced protein, putative                                    |
| 246430_at   | At5g17470 | 3 | calmodulin-like protein                                            |
| 260891_at   | At1g29080 | 3 | cysteine protease                                                  |
| 266723_at   | At2g03190 | 3 | E3 ubiquitin ligase SCF complex subunit SKP1/ASK1 (At16), putative |
| 265899_s_at | At2g25700 | 3 | E3 ubiquitin ligase SCF complex subunit SKP1/ASK1 (At3), putative  |
| 249502_s_at | At5g39280 | 3 | expansin, putative                                                 |
| 249556_at   | At5g38195 | 3 | Expressed protein                                                  |
| 261182_at   | At1g34575 | 3 | FAD-linked oxidoreductase family                                   |
| 249491_at   | At5g39130 | 3 | germin - like protein                                              |
| 260299_at   | At1g80330 | 3 | gibberellin 3 beta-hydroxylase, putative                           |
| 245275_at   | At4g15210 | 3 | glycosyl hydrolase family 14 (beta-amylase)                        |
| 267620_at   | At2g39640 | 3 | glycosyl hydrolase family 17                                       |
| 267394_s_at | At2g44540 | 3 | glycosyl hydrolase family 9                                        |
| 262102_at   | At1g02980 | 3 | hypothetical protein                                               |
| 263203_at   | At1g05490 | 3 | hypothetical protein                                               |
| 262862_at   | At1g64830 | 3 | hypothetical protein                                               |
| 266912_at   | At2g45900 | 3 | hypothetical protein                                               |
| 258873_at   | At3g03240 | 3 | hypothetical protein                                               |
| 257521_at   | At3g09140 | 3 | hypothetical protein                                               |
| 258932_at   | At3g10150 | 3 | hypothetical protein                                               |
| 257123_at   | At3g20030 | 3 | hypothetical protein                                               |
| 258289_at   | At3g23450 | 3 | hypothetical protein                                               |
| 254900_at   | At4g11510 | 3 | hypothetical protein                                               |
| 245467_at   | At4g16610 | 3 | hypothetical protein                                               |
| 253818_at   | At4g28330 | 3 | hypothetical protein                                               |
| 250870_at   | At5g03920 | 3 | hypothetical protein                                               |
| 253769_at   | At4g28560 | 3 | leucine rich repeat protein family (fragment)                      |
| 264214_s_at | At1g65330 | 3 | MADS-box protein                                                   |
| 267403_at   | At2g26320 | 3 | MADS-box protein                                                   |
| 259607_at   | At1g27940 | 3 | multidrug resistance P-glycoprotein, putative                      |
| 249704_at   | At5g35550 | 3 | myb family transcription factor                                    |
| 263161_at   | At1g54020 | 3 | myrosinase-associated protein, putative                            |
| 257841_at   | At3g25260 | 3 | nitrate transporter, putative                                      |
| 263734_at   | At1g60030 | 3 | permease, putative                                                 |
| 253655_at   | At4g30070 | 3 | plant defensin-fusion protein, putative                            |

|             |           |   |                                                                    |
|-------------|-----------|---|--------------------------------------------------------------------|
| 250578_at   | At5g07850 | 3 | proanthranilate N-benzoyltransferase -like protein                 |
| 267122_at   | At2g23550 | 3 | putative acetone-cyanohydrin lyase                                 |
| 267585_s_at | At2g42090 | 3 | putative actin                                                     |
| 266169_at   | At2g38900 | 3 | putative protease inhibitor                                        |
| 250889_at   | At5g04500 | 3 | putative protein                                                   |
| 246494_at   | At5g16190 | 3 | putative protein                                                   |
| 246900_at   | At5g25620 | 3 | putative protein                                                   |
| 255491_at   | At4g02670 | 3 | putative zinc finger protein                                       |
| 245890_at   | At5g09490 | 3 | ribosomal protein S15-like                                         |
| 247799_at   | At5g58840 | 3 | subtilisin-like serine protease                                    |
| 266245_at   | At2g27700 | 3 | translation initiation factor eIF-2, putative                      |
| 250467_at   | At5g10100 | 3 | trehalose-6-phosphate phosphatase -like protein                    |
| 256102_at   | At1g13680 | 3 | unknown protein                                                    |
| 248892_at   | At5g46300 | 3 | unknown protein                                                    |
| 248202_at   | At5g54220 | 3 | unknown protein                                                    |
| 267552_at   | At2g32770 | 4 | putative purple acid phosphatase precursor                         |
| 258182_at   | At3g21500 | 4 | 1-D-deoxyxylulose 5-phosphate synthase, putative                   |
| 249738_at   | At5g24510 | 4 | 60s acidic ribosomal protein P1                                    |
| 264066_at   | At2g27880 | 4 | Argonaute (AGO1)-like protein                                      |
| 266134_s_at | At2g45110 | 4 | beta-expansin, putative                                            |
| 255056_at   | At4g09820 | 4 | bHLH protein                                                       |
| 259045_at   | At3g03410 | 4 | calmodulin-like protein                                            |
| 247869_at   | At5g57520 | 4 | CCHH finger protein 2-like protein (pir  S55882)                   |
| 253683_at   | At4g29650 | 4 | cytidine deaminase 4 (CDA4)                                        |
| 246380_at   | At1g57750 | 4 | cytochrome P450, putative                                          |
| 266736_at   | At2g46960 | 4 | cytochrome P450, putative                                          |
| 247796_at   | At5g58782 | 4 | dehydrodolichyl diphosphate synthase (DEDOL-PP synthase), putative |
| 264401_at   | At1g61720 | 4 | dihydroflavonol 4-reductase, putative                              |
| 250994_at   | At5g02490 | 4 | dnaK-type molecular chaperone hsc70.1 - like                       |
| 265590_at   | At2g20160 | 4 | E3 ubiquitin ligase SCF complex subunit SKP1/ASK1 (At17), putative |
| 264610_at   | At1g04645 | 4 | Expressed protein                                                  |
| 262445_at   | At1g47485 | 4 | Expressed protein                                                  |
| 264163_at   | At1g65445 | 4 | Expressed protein                                                  |
| 267218_at   | At2g02515 | 4 | Expressed protein                                                  |
| 258490_at   | At3g02670 | 4 | expressed protein                                                  |
| 245371_at   | At4g15750 | 4 | expressed protein                                                  |
| 253164_at   | At4g35725 | 4 | Expressed protein                                                  |
| 248823_s_at | At5g46960 | 4 | expressed protein                                                  |
| 247757_at   | At5g59105 | 4 | Expressed protein                                                  |
| 264400_at   | At1g61800 | 4 | glucose-6-phosphate/phosphate-translocator precursor, putative     |
| 254591_at   | At4g18870 | 4 | heat shock transcription factor - like protein                     |
| 263204_at   | At1g05480 | 4 | hypothetical protein                                               |
| 264500_at   | At1g09370 | 4 | hypothetical protein                                               |
| 263026_at   | At1g24000 | 4 | hypothetical protein                                               |
| 263027_at   | At1g24010 | 4 | hypothetical protein                                               |
| 256492_at   | At1g31490 | 4 | hypothetical protein                                               |
| 262083_at   | At1g56100 | 4 | hypothetical protein                                               |
| 262895_at   | At1g59800 | 4 | hypothetical protein                                               |
| 257411_s_at | At1g61320 | 4 | hypothetical protein                                               |
| 256335_at   | At1g72110 | 4 | hypothetical protein                                               |
| 267541_at   | At2g32750 | 4 | hypothetical protein                                               |
| 257681_at   | At3g13370 | 4 | hypothetical protein                                               |

|             |           |   |                                                            |
|-------------|-----------|---|------------------------------------------------------------|
| 257089_at   | At3g20520 | 4 | hypothetical protein                                       |
| 257567_at   | At3g23930 | 4 | hypothetical protein                                       |
| 264461_s_at | At4g15050 | 4 | hypothetical protein                                       |
| 259844_at   | At1g73560 | 4 | lipid transfer protein, putative                           |
| 251555_at   | At3g58780 | 4 | MADS-box protein                                           |
| 255014_at   | At4g09960 | 4 | MADS-box protein                                           |
| 246834_at   | At5g26625 | 4 | MADS-box protein                                           |
| 256985_at   | At3g13540 | 4 | myb-related protein 5                                      |
| 266563_at   | At2g23990 | 4 | nodulin-like protein                                       |
| 245738_at   | At1g44130 | 4 | nucellin, putative                                         |
| 248405_at   | At5g51480 | 4 | pectinesterase (pectin methylesterase) family              |
| 260848_at   | At1g21850 | 4 | pectinesterase (pectin methylesterase), putative           |
| 265224_at   | At2g36710 | 4 | pectinesterase family                                      |
| 248593_at   | At5g49180 | 4 | pectinesterase family                                      |
| 252342_at   | At3g48950 | 4 | polygalacturonase, putative                                |
| 264554_at   | At1g09510 | 4 | putative cinnamyl alcohol dehydrogenase                    |
| 245892_at   | At5g09370 | 4 | putative lipid transfer protein                            |
| 258760_at   | At3g10780 | 4 | putative membrane protein                                  |
| 245389_at   | At4g17480 | 4 | putative protein                                           |
| 250360_at   | At5g11360 | 4 | putative protein                                           |
| 250267_at   | At5g12930 | 4 | putative protein                                           |
| 247666_at   | At5g60140 | 4 | putative protein                                           |
| 258590_at   | At3g04280 | 4 | putative response regulator protein (receiver component)   |
| 249856_at   | At5g22980 | 4 | serine carboxypeptidase                                    |
| 254394_at   | At4g21630 | 4 | subtilisin-like serine protease                            |
| 258116_at   | At3g14520 | 4 | terpene synthase/cyclase family                            |
| 251114_at   | At5g01380 | 4 | transcription factor GT-3a                                 |
| 261059_at   | At1g01250 | 4 | transcription factor TINY, putative                        |
| 267166_at   | At2g37720 | 4 | unknown protein                                            |
| 265954_at   | At2g37260 | 4 | WRKY family transcription factor                           |
| 250308_at   | At5g12180 | 5 | calcium-dependent protein kinase                           |
| 246065_at   | At5g19360 | 5 | calcium-dependent protein kinase - like                    |
| 261875_at   | At1g50610 | 5 | leucine-rich repeat transmembrane protein kinase, putative |
| 266494_at   | At2g07040 | 5 | leucine-rich repeat transmembrane protein kinase, putative |
| 257119_at   | At3g20190 | 5 | leucine-rich repeat transmembrane protein kinase, putative |
| 248604_at   | At5g49470 | 5 | protein kinase                                             |
| 250121_at   | At5g16500 | 5 | protein kinase-like protein                                |
| 263450_at   | At2g31500 | 5 | putative calcium-dependent protein kinase                  |
| 267531_at   | At2g41860 | 5 | putative calcium-dependent protein kinase                  |
| 259886_at   | At1g76370 | 5 | putative protein kinase                                    |
| 265923_at   | At2g18470 | 5 | putative protein kinase                                    |
| 265681_at   | At2g24370 | 5 | putative protein kinase                                    |
| 258600_at   | At3g02810 | 5 | putative protein kinase                                    |
| 258843_at   | At3g04690 | 5 | putative protein kinase                                    |
| 255006_at   | At4g10010 | 5 | putative protein kinase                                    |
| 250349_at   | At5g12000 | 5 | putative receptor - like kinase                            |
| 252933_at   | At4g39110 | 5 | putative receptor-like protein kinase                      |
| 246106_at   | At5g28680 | 5 | receptor-like protein kinase precursor - like              |
| 260737_at   | At1g17540 | 5 | receptor-like serine threonine kinase, putative            |
| 264369_at   | At1g70430 | 5 | Ste-20 related kinase SPAK, putative                       |
| 267571_at   | At2g30650 | 5 | 3-hydroxyisobutyryl-coenzyme A hydrolase                   |
| 259425_at   | At1g01460 | 5 | 4,5 PIP kinase, putative                                   |



|             |           |   |                                                         |
|-------------|-----------|---|---------------------------------------------------------|
| 248367_at   | At5g52360 | 5 | actin depolymerizing factor-like                        |
| 267168_at   | At2g37770 | 5 | aldo/keto reductase family                              |
| 247843_at   | At5g58050 | 5 | aluminium tolerance associated - like protein           |
| 253181_at   | At4g35180 | 5 | amino acid permease - like protein                      |
| 256521_at   | At1g66120 | 5 | AMP-binding enzyme, putative                            |
| 246942_at   | At5g25430 | 5 | anion exchanger-like protein                            |
| 251716_at   | At3g55870 | 5 | anthranilate synthase alpha-1 chain - like protein      |
| 252440_at   | At3g47440 | 5 | aquaporin-like protein                                  |
| 259189_at   | At3g01700 | 5 | arabinogalactan-protein (AGP11)                         |
| 254123_at   | At4g24640 | 5 | Bnm1 like protein                                       |
| 262022_at   | At1g35490 | 5 | bZIP family transcription factor                        |
| 245700_at   | At5g04180 | 5 | carbonate dehydratase - like protein                    |
| 249448_at   | At5g39420 | 5 | cdc2-like protein                                       |
| 263043_at   | At1g23350 | 5 | conserved hypothetical protein                          |
| 267559_at   | At2g45570 | 5 | cytochrome p450 family                                  |
| 257035_at   | At3g19270 | 5 | cytochrome P450, putative                               |
| 257065_at   | At3g18220 | 5 | diacylglycerol pyrophosphate phosphatase, putative      |
| 259799_at   | At1g72290 | 5 | drought induced protein, putative                       |
| 258686_at   | At3g07840 | 5 | exopolygalacturonase                                    |
| 260933_at   | At1g02470 | 5 | expressed protein                                       |
| 261687_at   | At1g47280 | 5 | expressed protein                                       |
| 265007_s_at | At1g61566 | 5 | Expressed protein                                       |
| 259370_at   | At1g69050 | 5 | expressed protein                                       |
| 263084_at   | At2g27180 | 5 | expressed protein                                       |
| 267431_at   | At2g34870 | 5 | expressed protein                                       |
| 263950_at   | At2g36020 | 5 | expressed protein                                       |
| 258591_at   | At3g04360 | 5 | expressed protein                                       |
| 258337_at   | At3g16040 | 5 | expressed protein                                       |
| 257819_at   | At3g25165 | 5 | Expressed protein                                       |
| 257821_at   | At3g25170 | 5 | Expressed protein                                       |
| 258077_at   | At3g26110 | 5 | expressed protein                                       |
| 253831_at   | At4g27580 | 5 | Expressed protein                                       |
| 246208_at   | At4g36490 | 5 | expressed protein                                       |
| 248840_at   | At5g46770 | 5 | expressed protein                                       |
| 248194_at   | At5g54095 | 5 | Expressed protein                                       |
| 253318_at   | At4g33970 | 5 | extensin-like protein                                   |
| 257392_at   | At2g24450 | 5 | fasciclin-like arabinogalactan-protein, putative (FLA3) |
| 258748_at   | At3g05930 | 5 | germin-like protein                                     |
| 246256_at   | At4g36770 | 5 | glucosyltransferase-like protein                        |
| 260513_at   | At1g51490 | 5 | glycosyl hydrolase family 1                             |
| 249243_s_at | At5g42260 | 5 | glycosyl hydrolase family 1                             |
| 247253_at   | At5g64790 | 5 | glycosyl hydrolase family 17                            |
| 251228_at   | At3g62710 | 5 | glycosyl hydrolase family 3                             |
| 246183_at   | At5g20940 | 5 | glycosyl hydrolase family 3                             |
| 263905_at   | At2g36190 | 5 | glycosyl hydrolase family 32                            |
| 252052_at   | At3g52600 | 5 | glycosyl hydrolase family 32                            |
| 265404_at   | At2g16730 | 5 | glycosyl hydrolase family 35 (beta-galactosidase)       |
| 253226_at   | At4g35010 | 5 | glycosyl hydrolase family 35 (beta-galactosidase)       |
| 252710_at   | At3g43860 | 5 | glycosyl hydrolase family 9                             |
| 245057_at   | At2g26490 | 5 | G-protein beta family                                   |
| 245640_at   | At1g25330 | 5 | helix-loop-helix protein homolog, putative              |
| 263655_at   | At1g04500 | 5 | hypothetical protein                                    |

|             |           |   |                                                    |
|-------------|-----------|---|----------------------------------------------------|
| 264601_at   | At1g04540 | 5 | hypothetical protein                               |
| 259464_at   | At1g18990 | 5 | hypothetical protein                               |
| 260661_at   | At1g19500 | 5 | hypothetical protein                               |
| 255950_at   | At1g22110 | 5 | hypothetical protein                               |
| 245658_at   | At1g28270 | 5 | hypothetical protein                               |
| 260888_at   | At1g29140 | 5 | hypothetical protein                               |
| 262389_at   | At1g49270 | 5 | hypothetical protein                               |
| 257469_at   | At1g49290 | 5 | hypothetical protein                               |
| 262393_at   | At1g49490 | 5 | hypothetical protein                               |
| 246392_at   | At1g58120 | 5 | hypothetical protein                               |
| 264269_at   | At1g60240 | 5 | hypothetical protein                               |
| 262696_at   | At1g75870 | 5 | hypothetical protein                               |
| 264139_at   | At1g78940 | 5 | hypothetical protein                               |
| 265368_at   | At2g13350 | 5 | hypothetical protein                               |
| 257433_at   | At2g21990 | 5 | hypothetical protein                               |
| 266160_at   | At2g28180 | 5 | hypothetical protein                               |
| 266607_at   | At2g46300 | 5 | hypothetical protein                               |
| 259266_at   | At3g01240 | 5 | hypothetical protein                               |
| 257523_at   | At3g01620 | 5 | hypothetical protein                               |
| 257532_at   | At3g04700 | 5 | hypothetical protein                               |
| 256389_at   | At3g06220 | 5 | hypothetical protein                               |
| 258753_at   | At3g09530 | 5 | hypothetical protein                               |
| 256945_at   | At3g19020 | 5 | hypothetical protein                               |
| 257082_at   | At3g20580 | 5 | hypothetical protein                               |
| 258168_at   | At3g21570 | 5 | hypothetical protein                               |
| 258290_at   | At3g23460 | 5 | hypothetical protein                               |
| 253153_at   | At4g35700 | 5 | hypothetical protein                               |
| 252733_at   | At3g43120 | 5 | indole-3-acetic acid induced protein, related      |
| 245997_at   | At5g20810 | 5 | indole-3-acetic acid induced protein, related      |
| 254640_at   | At4g18790 | 5 | ion transporter - like protein                     |
| 256450_at   | At1g75290 | 5 | isoflavone reductase homolog P3, putative          |
| 256509_at   | At1g75300 | 5 | isoflavone reductase homolog P3, putative          |
| 249194_at   | At5g42490 | 5 | kinesin heavy chain-like protein                   |
| 251835_at   | At3g55180 | 5 | lipase -like protein                               |
| 264137_at   | At1g78960 | 5 | lupeol synthase (LUP1), putative                   |
| 262146_at   | At1g52580 | 5 | membrane protein, putative                         |
| 245443_at   | At4g16730 | 5 | monoterpene synthase/cyclase family                |
| 258237_at   | At3g27810 | 5 | myb family transcription factor (ATMYB3)           |
| 257220_at   | At3g27812 | 5 | MYB family transcription factor (Atmyb3), putative |
| 265984_at   | At2g24210 | 5 | myrcene/ocimene synthase                           |
| 246841_at   | At5g26696 | 5 | nectarin - like protein                            |
| 248926_at   | At5g45880 | 5 | Ole e I (main olive allergen)-like protein         |
| 261045_at   | At1g01310 | 5 | pathogenesis related protein, putative             |
| 246751_at   | At5g27870 | 5 | pectin methyl-esterase - like protein              |
| 245053_at   | At2g26450 | 5 | pectin methylesterase, putative                    |
| 265127_at   | At1g55560 | 5 | pectinesterase (pectin methylesterase) family      |
| 266750_s_at | At2g47040 | 5 | pectinesterase family                              |
| 250631_at   | At5g07430 | 5 | pectinesterase family                              |
| 245959_at   | At5g19640 | 5 | peptide transport protein-like                     |
| 246145_at   | At5g19880 | 5 | peroxidase, putative                               |
| 248822_at   | At5g47000 | 5 | peroxidase, putative                               |
| 259740_at   | At1g64300 | 5 | phytochrome, putative                              |

|             |           |   |                                                     |
|-------------|-----------|---|-----------------------------------------------------|
| 266115_at   | At2g02140 | 5 | plant defensin protein, putative (PDF2.6)           |
| 262122_at   | At1g02790 | 5 | polygalacturonase, putative                         |
| 258639_at   | At3g07820 | 5 | polygalacturonase, putative                         |
| 251434_at   | At3g59850 | 5 | polygalacturonase, putative                         |
| 253151_at   | At4g35670 | 5 | polygalacturonase, putative                         |
| 248714_at   | At5g48140 | 5 | polygalacturonase, putative                         |
| 261528_at   | At1g14420 | 5 | polysaccharide lyase family 1 (pectate lyase)       |
| 267476_at   | At2g02720 | 5 | polysaccharide lyase family 1 (pectate lyase)       |
| 246545_at   | At5g15110 | 5 | polysaccharide lyase family 1 (pectate lyase)       |
| 249447_at   | At5g39400 | 5 | PTEN -like protein                                  |
| 250154_at   | At5g15140 | 5 | putative aldose 1-epimerase - like protein          |
| 260013_at   | At1g68090 | 5 | putative annexin                                    |
| 259353_at   | At3g05190 | 5 | putative branched-chain amino acid aminotransferase |
| 253833_at   | At4g27790 | 5 | putative calcium binding protein                    |
| 255423_at   | At4g03290 | 5 | putative calmodulin                                 |
| 245159_at   | At2g33100 | 5 | putative cellulose synthase                         |
| 256392_at   | At3g06260 | 5 | putative glycosyl transferase                       |
| 253807_at   | At4g28280 | 5 | putative GPI-anchored protein                       |
| 264387_at   | At1g11990 | 5 | putative growth regulator protein                   |
| 263230_at   | At1g05670 | 5 | putative indole-3-acetate beta-glucosyltransferase  |
| 266918_at   | At2g45800 | 5 | putative LIM-domain protein                         |
| 264648_at   | At1g09080 | 5 | putative luminal binding protein                    |
| 266126_at   | At2g45040 | 5 | putative metalloproteinase                          |
| 265587_at   | At2g19980 | 5 | putative pathogenesis-related protein               |
| 266764_at   | At2g47050 | 5 | putative pectinesterase                             |
| 258889_at   | At3g05610 | 5 | putative pectinesterase                             |
| 255515_at   | At4g02250 | 5 | putative pistil-specific protein                    |
| 265903_at   | At2g25600 | 5 | putative potassium transporter/channel              |
| 251697_at   | At3g56600 | 5 | putative protein                                    |
| 251250_at   | At3g62180 | 5 | putative protein                                    |
| 251252_at   | At3g62230 | 5 | putative protein                                    |
| 251180_at   | At3g62640 | 5 | putative protein                                    |
| 255425_s_at | At4g03360 | 5 | putative protein                                    |
| 254001_at   | At4g26260 | 5 | putative protein                                    |
| 253924_at   | At4g27110 | 5 | putative protein                                    |
| 253084_at   | At4g36260 | 5 | putative protein                                    |
| 253031_at   | At4g38190 | 5 | putative protein                                    |
| 252881_at   | At4g39610 | 5 | putative protein                                    |
| 246592_at   | At5g14890 | 5 | putative protein                                    |
| 249803_at   | At5g23780 | 5 | putative protein                                    |
| 246918_at   | At5g25340 | 5 | putative protein                                    |
| 246878_at   | At5g26060 | 5 | putative protein                                    |
| 246646_at   | At5g35090 | 5 | putative protein                                    |
| 249429_at   | At5g39880 | 5 | putative protein                                    |
| 249336_at   | At5g41070 | 5 | putative protein                                    |
| 249270_at   | At5g41780 | 5 | putative protein                                    |
| 248711_at   | At5g48270 | 5 | putative protein                                    |
| 248643_at   | At5g49130 | 5 | putative protein                                    |
| 248534_at   | At5g50030 | 5 | putative protein                                    |
| 247981_at   | At5g56640 | 5 | putative protein                                    |
| 247920_at   | At5g57670 | 5 | putative protein                                    |
| 247502_at   | At5g61940 | 5 | putative protein                                    |

|             |           |   |                                                                  |
|-------------|-----------|---|------------------------------------------------------------------|
| 247402_at   | At5g62750 | 5 | putative protein                                                 |
| 251874_at   | At3g54240 | 5 | putative protein (fragment)                                      |
| 263166_at   | At1g03050 | 5 | putative protein destination factor                              |
| 265491_s_at | At2g15650 | 5 | putative retroelement pol polyprotein                            |
| 255847_at   | At2g33270 | 5 | putative thioredoxin                                             |
| 250447_at   | At5g10800 | 5 | RRM-containing protein                                           |
| 261150_at   | At1g19640 | 5 | S-adenosyl-L-methionine:jasmonic acid carboxyl methyltransferase |
| 252937_at   | At4g39180 | 5 | SEC14 - like protein                                             |
| 252085_s_at | At3g52000 | 5 | serine-type carboxypeptidase like protein                        |
| 264791_at   | At2g17845 | 5 | similar to oxidoreductase -like protein                          |
| 256636_at   | At3g12000 | 5 | S-locus related protein SLR1 homolog (AtS1)                      |
| 259820_at   | At1g66210 | 5 | subtilisin-like serine protease                                  |
| 252499_s_at | At3g46840 | 5 | subtilisin-like serine protease                                  |
| 247758_at   | At5g59120 | 5 | subtilisin-like serine protease                                  |
| 262511_at   | At1g11250 | 5 | syntaxin SYP125                                                  |
| 259338_at   | At3g03800 | 5 | syntaxin SYP131                                                  |
| 264430_at   | At1g61680 | 5 | terpene synthase/cyclase family                                  |
| 249005_at   | At5g44630 | 5 | terpene synthase/cyclase family                                  |
| 260355_at   | At1g69180 | 5 | transcription factor CRC                                         |
| 256701_at   | At3g52270 | 5 | transcription initiation factor IIF, beta subunit, putative      |
| 263659_at   | At1g04470 | 5 | unknown protein                                                  |
| 265133_s_at | At1g51250 | 5 | unknown protein                                                  |
| 263144_at   | At1g54070 | 5 | unknown protein                                                  |
| 264626_at   | At1g65620 | 5 | unknown protein                                                  |
| 262976_at   | At1g75520 | 5 | unknown protein                                                  |
| 265705_at   | At2g03410 | 5 | unknown protein                                                  |
| 263440_at   | At2g28640 | 5 | unknown protein                                                  |
| 255835_at   | At2g33420 | 5 | unknown protein                                                  |
| 257358_at   | At2g40990 | 5 | unknown protein                                                  |
| 267097_at   | At2g41440 | 5 | unknown protein                                                  |
| 256584_at   | At3g28750 | 5 | unknown protein                                                  |
| 257106_at   | At3g29060 | 5 | unknown protein                                                  |
| 255251_at   | At4g04980 | 5 | unknown protein                                                  |
| 248470_at   | At5g50830 | 5 | unknown protein                                                  |
| 248359_at   | At5g52410 | 5 | unknown protein                                                  |
| 251592_at   | At3g57670 | 5 | zinc finger - like protein                                       |
| 259635_at   | At1g56360 | 6 | purple acid phosphatase, putative                                |
| 252004_at   | At3g52780 | 6 | purple acid phosphatase-like protein                             |
| 252005_at   | At3g52810 | 6 | purple acid phosphatase-like protein                             |
| 260424_at   | At1g72460 | 6 | leucine-rich repeat transmembrane protein kinase, putative       |
| 257261_s_at | At3g21920 | 6 | pollen coat receptor kinase, putative                            |
| 247662_at   | At5g60090 | 6 | protein kinase - like                                            |
| 267281_at   | At2g19400 | 6 | putative protein kinase                                          |
| 262508_at   | At1g11300 | 6 | serine/threonine kinase, putative                                |
| 247416_at   | At5g63070 | 6 | 40S ribosomal protein S15-like protein                           |
| 252090_at   | At3g52130 | 6 | 5B protein like protein                                          |
| 250619_at   | At5g07230 | 6 | A9                                                               |
| 251825_at   | At3g55100 | 6 | ABC transporter family protein                                   |
| 253863_at   | At4g27420 | 6 | ABC transporter family protein                                   |
| 252531_at   | At3g46520 | 6 | actin 12                                                         |
| 245820_at   | At1g26320 | 6 | allyl alcohol dehydrogenase, putative                            |
| 261532_at   | At1g71680 | 6 | amino acid permease, putative                                    |

|             |           |   |                                                                         |
|-------------|-----------|---|-------------------------------------------------------------------------|
| 253792_at   | At4g28700 | 6 | ammonium transporter - like protein                                     |
| 252769_at   | At3g42850 | 6 | arabinose kinase - like protein                                         |
| 250294_at   | At5g13380 | 6 | auxin reponsive - like protein                                          |
| 249048_at   | At5g44300 | 6 | auxin-repressed protein-like                                            |
| 250288_at   | At5g13350 | 6 | auxin-responsive - like protein                                         |
| 252035_at   | At3g52160 | 6 | beta-ketoacyl-CoA synthase family                                       |
| 257491_at   | At1g06170 | 6 | bHLH protein                                                            |
| 264117_at   | At2g31210 | 6 | bHLH protein                                                            |
| 261246_at   | At1g20080 | 6 | C2 domain-containing protein                                            |
| 263011_at   | At1g23250 | 6 | Ca <sup>2+</sup> -binding EF-hand common family protein, putative       |
| 260621_at   | At1g08065 | 6 | carbonic anhydrase, putative                                            |
| 253222_at   | At4g34850 | 6 | chalcone and stilbene synthase family                                   |
| 255805_at   | At4g10240 | 6 | CONSTANS B-box zinc finger family protein                               |
| 255649_at   | At4g00920 | 6 | contains region of similarity to mouse microtubule-associated protein 2 |
| 247759_at   | At5g59040 | 6 | copper transport protein - like                                         |
| 260788_at   | At1g06260 | 6 | cysteine proteinase                                                     |
| 261051_at   | At1g01280 | 6 | cytochrome p450 family                                                  |
| 261499_at   | At1g28430 | 6 | cytochrome p450 family                                                  |
| 247579_at   | At5g61320 | 6 | cytochrome p450 family                                                  |
| 260228_at   | At1g74540 | 6 | cytochrome p450 monooxygenase, putative                                 |
| 262765_at   | At1g13150 | 6 | cytochrome P450, putative                                               |
| 259615_at   | At1g47980 | 6 | desiccation-related protein, putative                                   |
| 261061_at   | At1g07540 | 6 | DNA-binding protein, putative                                           |
| 256354_at   | At1g54870 | 6 | dormancy related protein, putative                                      |
| 253271_s_at | At4g34210 | 6 | E3 ubiquitin ligase SCF complex subunit SKP1/ASK1 (At11), putative      |
| 249503_at   | At5g39310 | 6 | expansin-like protein                                                   |
| 256059_at   | At1g06990 | 6 | expressed protein                                                       |
| 261670_at   | At1g18520 | 6 | expressed protein                                                       |
| 255956_at   | At1g22015 | 6 | Expressed protein                                                       |
| 261442_at   | At1g28375 | 6 | Expressed protein                                                       |
| 246349_at   | At1g51915 | 6 | Expressed protein                                                       |
| 264187_at   | At1g54860 | 6 | expressed protein                                                       |
| 260038_at   | At1g68875 | 6 | Expressed protein                                                       |
| 263627_at   | At2g04675 | 6 | Expressed protein                                                       |
| 265473_at   | At2g15535 | 6 | Expressed protein                                                       |
| 265280_at   | At2g28355 | 6 | Expressed protein                                                       |
| 254762_at   | At4g13230 | 6 | Expressed protein                                                       |
| 245322_at   | At4g14815 | 6 | Expressed protein                                                       |
| 254607_at   | At4g18920 | 6 | expressed protein                                                       |
| 253772_at   | At4g28395 | 6 | Expressed protein                                                       |
| 253721_at   | At4g29250 | 6 | expressed protein                                                       |
| 253641_at   | At4g29980 | 6 | expressed protein                                                       |
| 249939_at   | At5g22430 | 6 | expressed protein                                                       |
| 246940_at   | At5g25400 | 6 | expressed protein                                                       |
| 248872_at   | At5g46795 | 6 | Expressed protein                                                       |
| 248716_at   | At5g48210 | 6 | expressed protein                                                       |
| 248218_at   | At5g53710 | 6 | expressed protein                                                       |
| 247546_at   | At5g61605 | 6 | Expressed protein                                                       |
| 247178_at   | At5g65205 | 6 | Expressed protein                                                       |
| 246896_at   | At5g25550 | 6 | extensin - like protein                                                 |
| 262681_at   | At1g75890 | 6 | family II extracellular lipase 2 (EXL2)                                 |
| 262674_at   | At1g75910 | 6 | family II extracellular lipase 4 (EXL4)                                 |

|             |           |   |                                                            |
|-------------|-----------|---|------------------------------------------------------------|
| 262683_at   | At1g75920 | 6 | family II extracellular lipase 5 (EXL5)                    |
| 262675_at   | At1g75930 | 6 | family II extracellular lipase 6 (EXL6)                    |
| 257691_at   | At3g12660 | 6 | fasciclin-like arabinogalactan-protein, family (FLA14)     |
| 258267_at   | At3g15870 | 6 | fatty acid desaturase family protein                       |
| 253240_at   | At4g34510 | 6 | fatty acid elongase 1 (FAE1), putative                     |
| 254595_at   | At4g18960 | 6 | floral homeotic protein agamous (AGAMOUS)                  |
| 267295_at   | At2g23800 | 6 | geranylgeranyl pyrophosphate synthase (GGPS2/GGPS5)        |
| 260773_at   | At1g78440 | 6 | gibberellin 2- oxidase (GA2-oxidase) (ga2ox1)              |
| 261305_at   | At1g48470 | 6 | glutamine synthetase, putative                             |
| 250561_at   | At5g08030 | 6 | glycerophosphodiester phosphodiesterase - like protein     |
| 250635_at   | At5g07510 | 6 | glycine-rich protein GRP14                                 |
| 250638_at   | At5g07540 | 6 | glycine-rich protein GRP16                                 |
| 250636_at   | At5g07520 | 6 | glycine-rich protein GRP18                                 |
| 250610_at   | At5g07550 | 6 | glycine-rich protein GRP19                                 |
| 250639_at   | At5g07560 | 6 | glycine-rich protein GRP20                                 |
| 262697_at   | At1g75940 | 6 | glycosyl hydrolase family 1, beta-glucosidase(ATA27)       |
| 257170_at   | At3g23770 | 6 | glycosyl hydrolase family 17                               |
| 245622_at   | At4g14080 | 6 | glycosyl hydrolase family 17 (anther-specific protein, A6) |
| 245970_at   | At5g20710 | 6 | glycosyl hydrolase family 35 (beta-galactosidase)          |
| 255958_at   | At1g22150 | 6 | high affinity sulphate transporter, putative               |
| 265821_at   | At2g17950 | 6 | homeodomain transcription factor, WUSCHEL                  |
| 264180_at   | At1g02190 | 6 | hypothetical protein                                       |
| 260909_at   | At1g02670 | 6 | hypothetical protein                                       |
| 264827_at   | At1g03390 | 6 | hypothetical protein                                       |
| 264603_at   | At1g04670 | 6 | hypothetical protein                                       |
| 261462_at   | At1g07850 | 6 | hypothetical protein                                       |
| 259527_at   | At1g12600 | 6 | hypothetical protein                                       |
| 262836_at   | At1g14680 | 6 | hypothetical protein                                       |
| 261468_s_at | At1g28500 | 6 | hypothetical protein                                       |
| 260886_at   | At1g29200 | 6 | hypothetical protein                                       |
| 245246_at   | At1g44254 | 6 | hypothetical protein                                       |
| 260195_at   | At1g67540 | 6 | hypothetical protein                                       |
| 259905_s_at | At1g74140 | 6 | hypothetical protein                                       |
| 261392_at   | At1g79780 | 6 | hypothetical protein                                       |
| 263271_s_at | At2g11480 | 6 | hypothetical protein                                       |
| 263611_at   | At2g16450 | 6 | hypothetical protein                                       |
| 265803_at   | At2g18115 | 6 | hypothetical protein                                       |
| 263245_at   | At2g31470 | 6 | hypothetical protein                                       |
| 267643_at   | At2g32890 | 6 | hypothetical protein                                       |
| 267449_at   | At2g33690 | 6 | hypothetical protein                                       |
| 267633_at   | At2g42180 | 6 | hypothetical protein                                       |
| 265881_at   | At2g42480 | 6 | hypothetical protein                                       |
| 256259_at   | At3g12460 | 6 | hypothetical protein                                       |
| 257726_at   | At3g18360 | 6 | hypothetical protein                                       |
| 257256_at   | At3g21970 | 6 | hypothetical protein                                       |
| 258294_at   | At3g23350 | 6 | hypothetical protein                                       |
| 252493_at   | At3g46750 | 6 | hypothetical protein                                       |
| 255530_at   | At4g02140 | 6 | hypothetical protein                                       |
| 249150_at   | At5g43340 | 6 | inorganic phosphate transporter (dbj BAA34390.1)           |
| 257442_at   | At2g28680 | 6 | legumin-like protein                                       |
| 247424_at   | At5g62850 | 6 | LIM7 - like protein                                        |
| 261673_at   | At1g18280 | 6 | lipid transfer protein, putative                           |

|             |           |   |                                                                   |
|-------------|-----------|---|-------------------------------------------------------------------|
| 256381_at   | At1g66850 | 6 | lipid transfer protein, putative                                  |
| 252063_at   | At3g51590 | 6 | lipid transfer protein-like protein                               |
| 246377_at   | At1g57550 | 6 | low-temperature-specific protein, putative                        |
| 246569_at   | At5g14980 | 6 | lysophospholipase -like protein                                   |
| 256662_at   | At3g11980 | 6 | male sterility protein 2 (MS2)                                    |
| 258195_at   | At3g13890 | 6 | myb family transcription factor                                   |
| 248596_at   | At5g49330 | 6 | myb family transcription factor                                   |
| 261274_at   | At1g26780 | 6 | myb-related protein, putative                                     |
| 253149_at   | At4g35650 | 6 | NAD <sup>+</sup> dependent isocitrate dehydrogenase -like protein |
| 264882_at   | At1g61110 | 6 | NAM protein, putative                                             |
| 263195_at   | At1g36150 | 6 | non-specific lipid transfer protein, putative                     |
| 253862_at   | At4g27330 | 6 | NOZZLE SPOROCTELESS                                               |
| 265176_at   | At1g23520 | 6 | OBP32pep protein, putative                                        |
| 266654_at   | At2g25890 | 6 | oleosin                                                           |
| 256827_at   | At3g18570 | 6 | oleosin                                                           |
| 262949_at   | At1g75790 | 6 | pectinesterase (pectin methylesterase) family                     |
| 253850_at   | At4g28090 | 6 | pectinesterase (pectin methylesterase), putative                  |
| 246136_at   | At5g28470 | 6 | peptide transporter - like protein                                |
| 260757_at   | At1g48940 | 6 | phytoeyanin, putative                                             |
| 259719_at   | At1g61070 | 6 | plant defensin protein, putative (PDF2.4)                         |
| 261943_at   | At1g80660 | 6 | plasma membrane ATPase, putative                                  |
| 249584_s_at | At5g37810 | 6 | pollen-specific membrane integral protein, putative               |
| 264208_at   | At1g22760 | 6 | polyadenylate-binding protein 3 (PABP3)                           |
| 258685_at   | At3g07830 | 6 | polygalacturonase, putative                                       |
| 249431_at   | At5g39910 | 6 | polygalacturonase, putative                                       |
| 248073_at   | At5g55720 | 6 | polysaccharide lyase family 1 (pectate lyase)                     |
| 245335_at   | At4g16160 | 6 | pore protein homolog                                              |
| 253434_at   | At4g32500 | 6 | potassium channel - protein                                       |
| 256833_at   | At3g22910 | 6 | potential calcium-transporting ATPase 13, plasma membrane-type    |
| 267255_at   | At2g22950 | 6 | potential calcium-transporting ATPase 7, plasma membrane-type     |
| 252160_at   | At3g50570 | 6 | proline-rich protein                                              |
| 259063_at   | At3g07450 | 6 | putative 5B-anther specific protein                               |
| 267440_at   | At2g19070 | 6 | putative anthranilate N-hydroxycinnamoyl/benzoyltransferase       |
| 267150_at   | At2g23510 | 6 | putative anthranilate N-hydroxycinnamoyl/benzoyltransferase       |
| 265261_at   | At2g42990 | 6 | putative APG isolog protein                                       |
| 259975_at   | At1g76470 | 6 | putative cinnamoyl-CoA reductase                                  |
| 264039_at   | At2g03740 | 6 | putative cold-regulated protein                                   |
| 265945_at   | At2g19500 | 6 | putative cytokinin oxidase                                        |
| 263753_at   | At2g21490 | 6 | putative dehydrin                                                 |
| 265263_at   | At2g42940 | 6 | putative DNA binding protein                                      |
| 263754_at   | At2g21510 | 6 | putative DnaJ protein                                             |
| 258984_at   | At3g08970 | 6 | putative DnaJ protein                                             |
| 267466_at   | At2g19010 | 6 | putative GDSL-motif lipase hydrolase                              |
| 257441_at   | At2g04020 | 6 | putative GDSL-motif lipase/hydrolase                              |
| 258561_at   | At3g05960 | 6 | putative hexose transporter                                       |
| 267453_at   | At2g33880 | 6 | putative homeodomain transcription factor                         |
| 267231_at   | At2g43900 | 6 | putative inositol polyphosphate 5'-phosphatase                    |
| 260075_at   | At1g73700 | 6 | putative integral membrane protein                                |
| 258940_at   | At3g09930 | 6 | putative lipase acylhydrolase                                     |
| 256398_at   | At3g06100 | 6 | putative major intrinsic protein                                  |
| 265181_at   | At1g23510 | 6 | putative OBP32pep protein                                         |
| 265163_at   | At1g23580 | 6 | putative OBP32pep protein                                         |

|             |           |   |                                               |
|-------------|-----------|---|-----------------------------------------------|
| 265180_at   | At1g23590 | 6 | putative OBP32pep protein                     |
| 265164_at   | At1g23600 | 6 | putative OBP32pep protein                     |
| 265552_at   | At2g07560 | 6 | putative plasma membrane proton ATPase        |
| 267317_at   | At2g34700 | 6 | putative proline-rich glycoprotein            |
| 252140_at   | At3g51070 | 6 | putative protein                              |
| 251981_at   | At3g53080 | 6 | putative protein                              |
| 251595_at   | At3g57620 | 6 | putative protein                              |
| 251620_at   | At3g58060 | 6 | putative protein                              |
| 254716_at   | At4g13560 | 6 | putative protein                              |
| 257558_s_at | At4g20680 | 6 | putative protein                              |
| 254104_at   | At4g25040 | 6 | putative protein                              |
| 253846_at   | At4g28000 | 6 | putative protein                              |
| 253652_at   | At4g30040 | 6 | putative protein                              |
| 253258_at   | At4g34400 | 6 | putative protein                              |
| 253195_at   | At4g35420 | 6 | putative protein                              |
| 246242_at   | At4g36600 | 6 | putative protein                              |
| 250902_at   | At5g03590 | 6 | putative protein                              |
| 250219_at   | At5g14190 | 6 | putative protein                              |
| 246586_at   | At5g14770 | 6 | putative protein                              |
| 246551_at   | At5g15070 | 6 | putative protein                              |
| 246526_at   | At5g15720 | 6 | putative protein                              |
| 246416_at   | At5g16920 | 6 | putative protein                              |
| 249428_at   | At5g39870 | 6 | putative protein                              |
| 249401_at   | At5g40260 | 6 | putative protein                              |
| 248880_at   | At5g46200 | 6 | putative protein                              |
| 248824_at   | At5g46940 | 6 | putative protein                              |
| 248350_at   | At5g52160 | 6 | putative protein                              |
| 248354_at   | At5g52330 | 6 | putative protein                              |
| 248355_at   | At5g52340 | 6 | putative protein                              |
| 248278_at   | At5g52890 | 6 | putative protein                              |
| 247941_at   | At5g57200 | 6 | putative protein                              |
| 247824_at   | At5g58460 | 6 | putative protein                              |
| 263087_s_at | At2g16120 | 6 | putative sugar transporter                    |
| 245086_at   | At2g39820 | 6 | putative translation initiation factor        |
| 258671_at   | At3g08560 | 6 | putative vacuolar ATP synthase subunit E      |
| 255861_at   | At2g30290 | 6 | putative vacuolar sorting receptor            |
| 255580_at   | At4g01470 | 6 | putative water channel protein                |
| 246418_at   | At5g16960 | 6 | quinone oxidoreductase -like protein          |
| 245883_at   | At5g09500 | 6 | ribosomal protein S15-like                    |
| 246002_at   | At5g20740 | 6 | ripening-related protein - like               |
| 264431_at   | At1g61700 | 6 | RNA polymerase II subunit (hsRPB10), putative |
| 257275_at   | At3g14450 | 6 | RNA-binding protein, putative                 |
| 262385_at   | At1g72960 | 6 | root hair defective, putative                 |
| 265331_at   | At2g18420 | 6 | similar to gibberellin-regulated proteins     |
| 253798_at   | At4g28500 | 6 | similar to NAM protein, putative              |
| 250904_at   | At5g03620 | 6 | subtilisin-like serine protease               |
| 261169_at   | At1g04920 | 6 | sucrose-phosphate synthase, putative          |
| 252107_at   | At3g51490 | 6 | sugar transporter-like protein                |
| 265323_at   | At2g18260 | 6 | syntaxin SYP112                               |
| 257107_at   | At3g29070 | 6 | transmembrane trafficking protein, putative   |
| 261702_at   | At1g32760 | 6 | unknown protein                               |
| 263369_at   | At2g20480 | 6 | unknown protein                               |



|             |           |   |                                                             |
|-------------|-----------|---|-------------------------------------------------------------|
| 266665_at   | At2g29790 | 6 | unknown protein                                             |
| 257349_at   | At2g30630 | 6 | unknown protein                                             |
| 259376_at   | At3g16320 | 6 | unknown protein                                             |
| 258465_at   | At3g17220 | 6 | unknown protein                                             |
| 257862_s_at | At3g17720 | 6 | unknown protein                                             |
| 256580_s_at | At3g28820 | 6 | unknown protein                                             |
| 256582_at   | At3g28840 | 6 | unknown protein                                             |
| 254033_at   | At4g25950 | 6 | V-ATPase G-subunit like protein                             |
| 253961_at   | At4g26440 | 6 | WRKY family transcription factor                            |
| 257102_at   | At3g25050 | 6 | xyloglucan endotransglycosylase, putative                   |
| 253087_at   | At4g36350 | 7 | purple acid phosphatase like protein                        |
| 245577_at   | At4g14780 | 7 | kinase like protein                                         |
| 257850_at   | At3g13065 | 7 | leucine-rich repeat transmembrane protein kinase, putative  |
| 255765_at   | At1g16760 | 7 | protein kinase, putative                                    |
| 257120_at   | At3g20200 | 7 | protein kinase, putative                                    |
| 257090_at   | At3g20530 | 7 | protein kinase, putative                                    |
| 266199_at   | At2g38910 | 7 | putative calcium-dependent protein kinase                   |
| 250642_at   | At5g07180 | 7 | receptor-like protein kinase                                |
| 261015_at   | At1g26480 | 7 | 14-3-3 protein GF14 iota (grf12)                            |
| 267147_at   | At2g38240 | 7 | 2-oxoglutarate-dependent dioxygenase family                 |
| 266972_at   | At2g39590 | 7 | 40S ribosomal protein S15A                                  |
| 261096_at   | At1g62940 | 7 | 4-coumarate:coenzyme A ligase, putative                     |
| 257183_at   | At3g13220 | 7 | ABC transporter family protein                              |
| 247736_at   | At5g59370 | 7 | actin 4                                                     |
| 245232_at   | At4g25590 | 7 | actin depolymerizing factor-like protein                    |
| 258451_at   | At3g22360 | 7 | alternative oxidase 1b precursor                            |
| 260921_at   | At1g21540 | 7 | amp-binding protein, putative                               |
| 261222_at   | At1g20120 | 7 | anter-specific proline-rich protein APG precursor, putative |
| 258392_at   | At3g15400 | 7 | anther development protein, ATA20                           |
| 257986_at   | At3g20865 | 7 | arabinogalactan-protein, putative (AGP)                     |
| 249250_at   | At5g42340 | 7 | arm repeat containing protein                               |
| 257508_at   | At1g64320 | 7 | bZIP transcription factor, putative                         |
| 246431_at   | At5g17480 | 7 | calcium-binding protein                                     |
| 264112_at   | At2g13675 | 7 | callose synthase (1,3-beta-glucan synthase) family          |
| 260702_at   | At1g32250 | 7 | calmodulin, putative                                        |
| 260518_at   | At1g51410 | 7 | cinnamyl alcohol dehydrogenase, putative                    |
| 255717_at   | At4g00350 | 7 | coded for by A. thaliana cDNA H76622                        |
| 256297_at   | At1g69500 | 7 | cytochrome P450, putative                                   |
| 246761_at   | At5g27980 | 7 | embryonic abundant protein - like                           |
| 258645_s_at | At3g07850 | 7 | exopolygalacturonase                                        |
| 261580_at   | At1g01110 | 7 | expressed protein                                           |
| 262156_at   | At1g52680 | 7 | expressed protein                                           |
| 259693_at   | At1g63060 | 7 | expressed protein                                           |
| 265401_at   | At2g10970 | 7 | expressed protein                                           |
| 267443_at   | At2g19000 | 7 | expressed protein                                           |
| 266550_s_at | At2g35070 | 7 | Expressed protein                                           |
| 251654_at   | At3g57140 | 7 | expressed protein                                           |
| 245314_at   | At4g16745 | 7 | Expressed protein                                           |
| 254627_at   | At4g18395 | 7 | Expressed protein                                           |
| 247897_at   | At5g57810 | 7 | expressed protein                                           |
| 256416_at   | At3g11050 | 7 | ferritin subunit, putative                                  |
| 259372_at   | At1g69120 | 7 | floral homeotic gene APETALA1                               |

|             |           |   |                                                               |
|-------------|-----------|---|---------------------------------------------------------------|
| 251898_at   | At3g54340 | 7 | floral homeotic protein APETALA3 (AP3)                        |
| 255806_at   | At4g10260 | 7 | fructokinase - like protein                                   |
| 248924_at   | At5g45960 | 7 | GDSL-motif lipase/hydrolase protein                           |
| 247731_at   | At5g59590 | 7 | glucuronosyl transferase - like protein                       |
| 258767_at   | At3g10890 | 7 | glycosyl hydrolase family 5/cellulase                         |
| 262121_at   | At1g02800 | 7 | glycosyl hydrolase family 9 (endo-1,4-beta-glucanase, ATCEL2) |
| 248211_at   | At5g54010 | 7 | glycosyltransferase family                                    |
| 245958_at   | At5g19610 | 7 | GNOM-like protein                                             |
| 262742_at   | At1g28550 | 7 | GTP-binding protein, putative                                 |
| 267447_at   | At2g33870 | 7 | GTP-binding protein, putative                                 |
| 255815_at   | At1g19890 | 7 | histone H3, putative                                          |
| 256587_at   | At3g28780 | 7 | histone-H4-like protein                                       |
| 250915_at   | At5g03790 | 7 | homeodomain protein                                           |
| 265215_at   | At1g05040 | 7 | hypothetical protein                                          |
| 264564_at   | At1g05290 | 7 | hypothetical protein                                          |
| 257489_at   | At1g07330 | 7 | hypothetical protein                                          |
| 257402_at   | At1g23570 | 7 | hypothetical protein                                          |
| 245741_at   | At1g44120 | 7 | hypothetical protein                                          |
| 262998_at   | At1g54280 | 7 | hypothetical protein                                          |
| 262179_at   | At1g77980 | 7 | hypothetical protein                                          |
| 262936_at   | At1g79400 | 7 | hypothetical protein                                          |
| 261396_at   | At1g79800 | 7 | hypothetical protein                                          |
| 263092_at   | At2g16210 | 7 | hypothetical protein                                          |
| 266773_at   | At2g29040 | 7 | hypothetical protein                                          |
| 266132_at   | At2g45130 | 7 | hypothetical protein                                          |
| 259265_at   | At3g01250 | 7 | hypothetical protein                                          |
| 258968_at   | At3g10460 | 7 | hypothetical protein                                          |
| 256445_at   | At3g11160 | 7 | hypothetical protein                                          |
| 257255_at   | At3g21960 | 7 | hypothetical protein                                          |
| 258344_at   | At3g22650 | 7 | hypothetical protein                                          |
| 257921_at   | At3g23270 | 7 | hypothetical protein                                          |
| 258129_at   | At3g24620 | 7 | hypothetical protein                                          |
| 256581_at   | At3g28830 | 7 | hypothetical protein                                          |
| 252623_at   | At3g45320 | 7 | hypothetical protein                                          |
| 252061_at   | At3g52620 | 7 | hypothetical protein                                          |
| 255715_s_at | At4g00320 | 7 | hypothetical protein                                          |
| 255609_s_at | At4g01180 | 7 | hypothetical protein                                          |
| 251836_at   | At3g55190 | 7 | lipase -like protein                                          |
| 255952_at   | At1g22130 | 7 | MADS-box protein                                              |
| 266793_at   | At2g03060 | 7 | MADS-box protein                                              |
| 267528_at   | At2g45650 | 7 | MADS-box protein (AGL6)                                       |
| 248245_at   | At5g53190 | 7 | MtN3 protein-like                                             |
| 249349_at   | At5g40350 | 7 | myb family transcription factor                               |
| 245643_at   | At1g25340 | 7 | myb-related transcription factor (cpm7), putative             |
| 251564_at   | At3g58160 | 7 | myosin heavy chain MYA3                                       |
| 254419_at   | At4g21490 | 7 | NADH dehydrogenase like protein                               |
| 256857_at   | At3g15170 | 7 | NAM-like protein                                              |
| 247951_at   | At5g57240 | 7 | oxysterol-binding protein-like                                |
| 248812_at   | At5g47330 | 7 | palmitoyl-protein thioesterase precursor-like                 |
| 265080_at   | At1g55570 | 7 | pectinesterase (pectin methylesterase) family                 |
| 256955_at   | At3g13390 | 7 | pectinesterase (pectin methylesterase) family                 |
| 250606_s_at | At5g07410 | 7 | pectinesterase family                                         |

|             |           |   |                                                               |
|-------------|-----------|---|---------------------------------------------------------------|
| 250608_at   | At5g07420 | 7 | pectinesterase family                                         |
| 259044_at   | At3g03430 | 7 | pollen allergen Bra r II                                      |
| 249536_at   | At5g38760 | 7 | pollen coat -like protein                                     |
| 251258_at   | At3g62170 | 7 | pollen-specific pectin esterase, putative                     |
| 256307_at   | At1g30350 | 7 | polysaccharide lyase family 1 (pectate lyase)                 |
| 266697_at   | At2g19770 | 7 | profilin 4                                                    |
| 252161_at   | At3g50580 | 7 | proline-rich protein                                          |
| 264614_s_at | At1g04580 | 7 | putative aldehyde oxidase                                     |
| 258732_at   | At3g05820 | 7 | putative alkaline/neutral invertase                           |
| 263718_at   | At2g13570 | 7 | putative CCAAT-box binding transcription factor               |
| 263363_at   | At2g03850 | 7 | putative cold-regulated protein                               |
| 262595_at   | At1g15360 | 7 | putative ethylene responsive element                          |
| 264395_at   | At1g12070 | 7 | putative GDP-dissociation inhibitor                           |
| 255101_at   | At4g08670 | 7 | putative lipid transfer protein                               |
| 252571_at   | At3g45280 | 7 | putative protein                                              |
| 251569_at   | At3g58290 | 7 | putative protein                                              |
| 251433_at   | At3g59830 | 7 | putative protein                                              |
| 251339_at   | At3g60780 | 7 | putative protein                                              |
| 254917_at   | At4g11350 | 7 | putative protein                                              |
| 253781_at   | At4g28580 | 7 | putative protein                                              |
| 253661_at   | At4g30130 | 7 | putative protein                                              |
| 253356_at   | At4g33390 | 7 | putative protein                                              |
| 252914_at   | At4g39130 | 7 | putative protein                                              |
| 250997_at   | At5g02570 | 7 | putative protein                                              |
| 250677_at   | At5g06520 | 7 | putative protein                                              |
| 250535_at   | At5g08480 | 7 | putative protein                                              |
| 250036_at   | At5g18340 | 7 | putative protein                                              |
| 245946_at   | At5g19580 | 7 | putative protein                                              |
| 249468_at   | At5g39650 | 7 | putative protein                                              |
| 248831_at   | At5g47160 | 7 | putative protein                                              |
| 247512_at   | At5g61720 | 7 | putative protein                                              |
| 247122_at   | At5g66020 | 7 | putative protein                                              |
| 247055_at   | At5g66740 | 7 | putative protein                                              |
| 258278_at   | At3g26860 | 7 | putative self-incompatibility protein                         |
| 267253_at   | At2g22960 | 7 | putative serine carboxypeptidase I                            |
| 249649_at   | At5g37060 | 7 | putative transporter protein                                  |
| 256261_at   | At3g12160 | 7 | ras-related GTP-binding protein, putative                     |
| 259286_at   | At3g11480 | 7 | S-adenosyl-L-methionine:carboxyl methyltransferase family     |
| 267250_at   | At2g23060 | 7 | similar to hookless1 (HLS1)                                   |
| 265379_at   | At2g18340 | 7 | similar to late embryogenesis abundant proteins               |
| 267458_at   | At2g33670 | 7 | similar to Mlo proteins from <i>H. vulgare</i>                |
| 259451_at   | At1g13890 | 7 | synaptosomal associated protein (SNAP25A), putative           |
| 259986_at   | At1g75050 | 7 | thaumatin-like protein                                        |
| 258258_at   | At3g26790 | 7 | transcriptional regulator (FUSCA3)                            |
| 247639_s_at | At5g60500 | 7 | undecaprenyl pyrophosphate synthetase (UPP synthetase) family |
| 264320_at   | At1g04090 | 7 | unknown protein                                               |
| 261171_at   | At1g04880 | 7 | unknown protein                                               |
| 260158_at   | At1g79910 | 7 | unknown protein                                               |
| 263360_at   | At2g03830 | 7 | unknown protein                                               |
| 267527_at   | At2g45610 | 7 | unknown protein                                               |
| 259262_at   | At3g01020 | 7 | unknown protein                                               |
| 256975_at   | At3g21000 | 7 | unknown protein                                               |

|             |           |   |                                                                     |
|-------------|-----------|---|---------------------------------------------------------------------|
| 256588_at   | At3g28790 | 7 | unknown protein                                                     |
| 258058_at   | At3g28980 | 7 | unknown protein                                                     |
| 248752_at   | At5g47600 | 7 | unknown protein                                                     |
| 257737_at   | At3g27440 | 7 | uridine kinase/uracil phosphoribosyl transferas, putative           |
| 247928_at   | At5g57320 | 7 | villin                                                              |
| 252212_at   | At3g50310 | 8 | protein kinase -like protein                                        |
| 265216_at   | At1g05100 | 8 | putative NPK1-related MAP kinase                                    |
| 260116_at   | At1g33960 | 8 | AIG1                                                                |
| 249541_at   | At5g38130 | 8 | anthranilate N-benzoyltransferase -like protein                     |
| 259368_at   | At1g69100 | 8 | aspartic protease, putative                                         |
| 257460_at   | At1g75580 | 8 | auxin induced protein, putative                                     |
| 258082_at   | At3g25905 | 8 | CLE27, putative                                                     |
| 267129_at   | At2g23380 | 8 | curly leaf protein (polycomb-group)                                 |
| 251838_at   | At3g54940 | 8 | cysteine proteinase                                                 |
| 252897_at   | At4g39490 | 8 | cytochrome P450 - like protein                                      |
| 251301_at   | At3g61880 | 8 | cytochrome p450 (CYP78A9)                                           |
| 252674_at   | At3g44250 | 8 | cytochrome p450 family                                              |
| 251988_at   | At3g53300 | 8 | cytochrome p450 family                                              |
| 249012_at   | At5g44620 | 8 | cytochrome p450 family                                              |
| 256782_at   | At3g13660 | 8 | disease resistance responseprotein-related/ dirigentprotein-related |
| 261088_at   | At1g07590 | 8 | DNA-binding protein, putative                                       |
| 260124_at   | At1g36340 | 8 | E2, ubiquitin-conjugating enzyme, putative                          |
| 264499_at   | At1g30795 | 8 | Expressed protein                                                   |
| 263713_at   | At2g20595 | 8 | Expressed protein                                                   |
| 258370_at   | At3g14395 | 8 | Expressed protein                                                   |
| 245717_at   | At5g33390 | 8 | Expressed protein                                                   |
| 249179_at   | At5g42955 | 8 | Expressed protein                                                   |
| 261623_at   | At1g01980 | 8 | FAD-linked oxidoreductase family                                    |
| 263215_at   | At1g30710 | 8 | FAD-linked oxidoreductase family                                    |
| 254459_at   | At4g21200 | 8 | gibberellin 20-oxidase family                                       |
| 266270_at   | At2g29470 | 8 | glutathione transferase, putative                                   |
| 246096_at   | At5g20330 | 8 | glycosyl hydrolase family 17 (beta-1,3-glucanase bg4)               |
| 246123_at   | At5g20390 | 8 | glycosyl hydrolase family 17 (beta-1,3-glucanase)                   |
| 252555_at   | At3g45940 | 8 | glycosyl hydrolase family 31                                        |
| 267398_at   | At2g44560 | 8 | glycosyl hydrolase family 9                                         |
| 261243_at   | At1g20180 | 8 | hypothetical protein                                                |
| 265158_at   | At1g31040 | 8 | hypothetical protein                                                |
| 259809_at   | At1g49800 | 8 | hypothetical protein                                                |
| 261313_at   | At1g52970 | 8 | hypothetical protein                                                |
| 264241_at   | At1g54840 | 8 | hypothetical protein                                                |
| 257439_at   | At2g17000 | 8 | hypothetical protein                                                |
| 257350_x_at | At2g19040 | 8 | hypothetical protein                                                |
| 265625_at   | At2g27240 | 8 | hypothetical protein                                                |
| 245158_at   | At2g33130 | 8 | hypothetical protein                                                |
| 265854_at   | At2g42370 | 8 | hypothetical protein                                                |
| 258798_at   | At3g04540 | 8 | hypothetical protein                                                |
| 252330_at   | At3g48770 | 8 | hypothetical protein                                                |
| 254647_at   | At4g18540 | 8 | hypothetical protein                                                |
| 254597_at   | At4g18980 | 8 | hypothetical protein                                                |
| 264151_at   | At1g02070 | 8 | hypothetical protein predicted by genefinder                        |
| 248020_at   | At5g56490 | 8 | hypothetical protein common family                                  |
| 259187_at   | At3g01530 | 8 | myb family transcription factor                                     |

|             |           |   |                                                              |
|-------------|-----------|---|--------------------------------------------------------------|
| 249632_at   | At5g37170 | 8 | O-methyltransferase, family 2 family                         |
| 257886_at   | At3g17060 | 8 | pectinesterase family                                        |
| 264863_at   | At1g24110 | 8 | peroxidase, putative                                         |
| 249560_at   | At5g38330 | 8 | plant defensin-fusion protein, putative                      |
| 266558_at   | At2g23900 | 8 | polygalacturonase, putative                                  |
| 262779_at   | At1g13070 | 8 | pseudogene, putative cytochrome P450 monooxygenase           |
| 259601_s_at | At2g11060 | 8 | pseudogene, TNP1-like transposon protein                     |
| 260193_at   | At1g67640 | 8 | putative amino acid permease                                 |
| 265200_s_at | At2g36790 | 8 | putative glucosyl transferase                                |
| 264453_at   | At1g10300 | 8 | putative GTP-binding protein                                 |
| 251698_at   | At3g56610 | 8 | putative protein                                             |
| 266029_at   | At2g05850 | 8 | putative serine carboxypeptidase II                          |
| 265878_at   | At2g42410 | 8 | putative SUPERMAN-like C2H2 zinc finger transcription factor |
| 250795_at   | At5g05280 | 8 | RING zinc finger protein-like                                |
| 245982_at   | At5g13170 | 8 | senescence-associated protein (SAG29)                        |
| 260386_at   | At1g74010 | 8 | strictosidine synthase family                                |
| 249760_at   | At5g23960 | 8 | terpene synthase/cyclase family                              |
| 255489_at   | At4g02650 | 8 | unknown protein                                              |
| 249157_at   | At5g43510 | 8 | unknown protein                                              |
| 254598_at   | At4g18990 | 8 | xyloglucan endotransglycosylase, putative                    |
| 264549_at   | At1g09440 | 9 | putative ser/thr protein kinase                              |
| 254009_at   | At4g26390 | 9 | pyruvate kinase like protein                                 |
| 249381_at   | At5g40040 | 9 | acidic ribosomal protein P2 -like                            |
| 265829_at   | At2g14490 | 9 | ARF GTPase-activating domain-containing protein              |
| 245465_at   | At4g16590 | 9 | cellulose synthase like protein                              |
| 257835_at   | At3g25180 | 9 | cytochrome p450 family                                       |
| 259429_at   | At1g01600 | 9 | cytochrome P450, putative                                    |
| 260241_at   | At1g63710 | 9 | cytochrome P450, putative                                    |
| 258962_at   | At3g10570 | 9 | cytochrome p450, putative                                    |
| 263982_at   | At2g42860 | 9 | expressed protein                                            |
| 262795_at   | At1g13130 | 9 | glycosyl hydrolase family 5/cellulase                        |
| 259390_at   | At1g06340 | 9 | hypothetical protein                                         |
| 259526_at   | At1g12570 | 9 | hypothetical protein                                         |
| 259917_at   | At1g72580 | 9 | hypothetical protein                                         |
| 261773_at   | At1g76250 | 9 | hypothetical protein                                         |
| 265860_at   | At2g01810 | 9 | hypothetical protein                                         |
| 267156_at   | At2g37610 | 9 | hypothetical protein                                         |
| 257210_at   | At3g14950 | 9 | hypothetical protein                                         |
| 257161_at   | At3g24280 | 9 | hypothetical protein                                         |
| 248275_at   | At5g53520 | 9 | isp4 protein                                                 |
| 254622_at   | At4g18375 | 9 | KH domain protein                                            |
| 256544_at   | At1g42560 | 9 | Mlo-like protein                                             |
| 260433_at   | At1g68170 | 9 | MtN21-like protein                                           |
| 259432_at   | At1g01520 | 9 | myb family transcription factor                              |
| 245842_at   | At1g58430 | 9 | proline-rich protein, putative                               |
| 261752_at   | At1g76290 | 9 | putative AMP-binding protein                                 |
| 264016_at   | At2g21220 | 9 | putative auxin-regulated protein                             |
| 266475_at   | At2g31100 | 9 | putative lipase                                              |
| 255369_at   | At4g04080 | 9 | putative NifU-like metallocluster assembly factor            |
| 255666_at   | At4g00390 | 9 | putative protein                                             |
| 254956_at   | At4g10850 | 9 | putative protein                                             |
| 254028_s_at | At4g25860 | 9 | putative protein                                             |

|           |           |   |                  |
|-----------|-----------|---|------------------|
| 252910_at | At4g39590 | 9 | putative protein |
| 250251_at | At5g13670 | 9 | putative protein |
| 246687_at | At5g33370 | 9 | putative protein |
| 248314_at | At5g52620 | 9 | putative protein |
| 257493_at | At1g48180 | 9 | unknown protein  |
| 258503_at | At3g02500 | 9 | unknown protein  |
| 248894_at | At5g46320 | 9 | unknown protein  |
